# Supplementary material for: Integrated metabolome and transcriptome revealed the flavonoid biosynthetic pathway in developing Vernonia amygdalina leaves
Source: PeerJ. 2021 Apr 26;9:e11239. doi: 10.7717/peerj.11239 (PMC8083182; doi:10.7717/peerj.11239)
Supplement: Supplemental Information 4 [file peerj-09-11239-s004.xlsx]

## Sheet: Sheet1
Supplementary Table S1 The primers for qRT-PCR analysis.
Genes	Forward primer	Reverse primer
Actin	TGCAGGATGCTGGATGTAAG	CCGGACCCATATTAGGTGATTG
Va-PAL1.3	GCATTGTTGTCGGAAGTCTTATC	CTGACCAGGGTGATGCTTTA
Va-PAL2	TAAGCCAAGTAGCCAAGAAGG	CAAAGACGTACTCACGGTCTAC
Va-C4H1	AGTGGAGGCGAATGGTAATG	GGATCGGCAATGCAAGGATA
Va-4CL3	GGCGACAAAGAGAACGATAGA	GAGCCGATCAACGATGAAGA
Va-CHS1	CAGGACCGAATCCAAACAGA	CCTTGACGAGATGCGAAAGA
Va-CHI	TGAGTGGCCTGAAGGTTATTT	GCTTCCTCATCTAGCCCTATTG
Va-FNSII	CGAGGATACACACAGAAGGTATG	CCCTTTCCCATCTTCTCTCTTC
Va-IFS3	TTCCCAACGACTTGGTCTATTT	AACAGACACCTCTGCGATAAC
Va-F3'5'H	GGAGAGGGAGAGAAGCTATCA	CAGAAGCGACGGACTACAAA
