# Supplementary material for: Integrated metabolome and transcriptome revealed the flavonoid biosynthetic pathway in developing Vernonia amygdalina leaves
Source: PeerJ. 2021 Apr 26;9:e11239. doi: 10.7717/peerj.11239 (PMC8083182; doi:10.7717/peerj.11239)
Supplement: Supplemental Information 5 [file peerj-09-11239-s005.xlsx]

## Sheet: Sheet1
Supplementary Table S2 The flavonoid profilings in developing Vernonia amygdalina leaves.
									Relative content (%)			Mean peak area			Dtandard deviation of peak area
	Alignment ID	Ontology	Abbreviation	Adduct ion name	Average Rt(min)	Average Mz	Formula	INCHIKEY	10DAG	20DAG	30DAG	10DAG	20DAG	30DAG	10DAG	20DAG	30DAG
Substrates for flavonoid biosynthesis	neg_399	Phenylalanine	Phenylalanine	[M-H]-	1.83	164.072	C9H11NO2	COLNVLDHVKWLRT-UHFFFAOYNA-N	0.246622	0.14463	0.0985965	504901	284047	175364	10719.7	15621.5	13074.8
	neg_337	trans-cinnamic acid	TCA	[M-H]-	1.83	147.045	C9H8O2	WBYWAXJHAXSJNI-VOTSOKGWSA-N	0.00693544	6.14406e-05	6.22211e-05	14198.7	120.667	110.667	2753.19	3.78594	10.504
	pos_193	p-coumaric acid	p-coumaric acid	[M+H]+	1.07	165.055	C9H8O3	NGSWKAQJJWESNS-ZZXKWVIFSA-N	0.0166968	0.0111503	0.0121311	34182.7	21898.7	21576.3	2060.38	1064.66	1636.53
Dihydroflavone	neg_711	6-Hydroxyflavanone	6-HF	[M-H]-	0.7	239.076	C15H12O3	XYHWPQUEOOBIOW-UHFFFAOYNA-N	0.00904818	0.0153513	0	18524	30149.3	0	2421.21	1897.55	0
	neg_810	Naringenin	Naringenin	[M-H]-	7.97	271.06	C15H12O5	FTVWIRXFELQLPI-UHFFFAOYNA-N	0.00668795	0	0	13692	0	0	1480.18	0	0
	neg_1227	6,8-Diprenylnaringenin	6,9-DRNA	[M-H]-	5.1	407.207	C25H28O5	HCNLDGTUMBOHKT-NRFANRHFSA-N	0	0.00793195	0	0	15578	0	0	3819.72	0
	neg_1454	Eriodictyol	Eriodictyol	[M-H]-	12.77	575.115	C15H12O6	SBHXYTNGIZCORC-ZDUSSCGKSA-N	0.0494024	0.0466682	0.0526895	101140	91654.3	93713.7	4901.79	4759.11	6416.88
	pos_383	2' - Hydroxyflavanone	2' - HF	[M+H]+	7.46	241.086	C15H12O3	KZKWCKFDCPVDFJ-UHFFFAOYNA-N	0.01261	0.0134623	0.0149848	25816	26439.3	26652	3683.48	3171.77	1200.17
	pos_827	8-(2,3-Dihydroxy-3-methylbutyl)-5,7-dimethoxy-2-phenyl-2,3-dihydro-4H-chromen-4-one	8-MButDMPCr	[M+Na]+	10.03	409.162	C22H26O6	SDEUJZQQWGXEEM-UHFFFAOYNA-N	0.0290611	0.0274269	0.0239396	59495.7	53865.3	42579	3103.37	2419.69	2924.68
Flavone	neg_700	7-Hydroxyflavone	7-HF	[M-H]-	0.61	237.06	C15H10O3	MQGPSCMMNJKMHQ-UHFFFAOYSA-N	0.0157283	0.0235757	0.0299278	32200	46301.7	53229.7	2066.65	6110.38	4604.14
	neg_701	3'-Hydroxyflavone	3'-HF	[M-H2O-H]-	0.95	237.097	C15H10O3	ISZWRZGKEWQACU-UHFFFAOYSA-N	0	0.034812	0.0337808	0	68369.3	60082.7	0	7939.29	2699.73
	neg_803	Pratol	Pratol	[M-H]-	0.83	267.105	C16H12O4	SQVXWIUVAILQRH-UHFFFAOYSA-N	0	0.0141339	0.0125574	0	27758.3	22334.7	0	3751.78	482.446
	neg_805	Baicalein	Baicalein	[M-H]-	4.77	269.045	C15H10O5	FXNFHKRTJBSTCS-UHFFFAOYSA-N	0.00849573	0.00984	0.0138386	17393	19325.3	24613.3	2531.84	3894.6	3350.55
	neg_807	Apigenin	Apigenin	[M-C6H10O5-H]-	6.04	269.046	C15H10O5	KZNIFHPLKGYRTM-UHFFFAOYSA-N	0.00626381	0	0	12823.7	0	0	1614.17	0	0
	neg_913	Diosmetin	Diosmetin	[M-H]-	7.48	299.057	C16H12O6	MBNGWHIJMBWFHU-UHFFFAOYSA-N	0.0756086	0.236801	0.205771	154791	465068	365985	33184.8	52960.9	40768
	neg_971	Nepetin	Nepetin	[M-H]-	6.74	315.051	C16H12O7	FHHSEFRSDKWJKJ-UHFFFAOYSA-N	0.165643	0.0708512	0.130976	339115	139149	232954	33428.1	13207.8	33033.2
	neg_1294	Apigetrin	Apigetrin	[M-H]-	6.04	431.098	C21H20O10	KMOUJOKENFFTPU-QNDFHXLGSA-N	0.016876	0	0	34549.7	0	0	3258.45	0	0
	neg_1312	Baicalin	Baicalin	[M-H]-	4.76	445.077	C21H18O11	IKIIZLYTISPENI-ZFORQUDYSA-N	0.0323253	0.0420999	0.0556309	66178.3	82682.3	98945.3	6093.52	9859.2	2638.17
	neg_1462	Rhoifolin	Rhoifolin	[M-H]-	5.77	577.152	C27H30O14	RPMNUQRUHXIGHK-PYXJVEIZSA-N	0	0.00690969	0.00841353	0	13570.3	14964.3	0	1709.5	2763.72
	pos_948	Orientin	Orientin	[M+H]+	5.98	449.103	C21H20O11	PLAPMLGJVGLZOV-YJQKKJGLSA-N	0.00538475	0	0	11024	0	0	784.189	0	0
	pos_1008	5-Hydroxy-2-(4-hydroxyphenyl)-4-oxo-4H-chromen-7-yl 6-O-acetyl-β-D-glucopyranoside	HPCA-β-D-Glc	[M+H]+	5.98	475.128	C23H22O11	LYFXRHUNCZZUTQ-UHFFFAOYNA-N	0.00719823	0	0	14736.7	0	0	2570.03	0	0
	pos_1013	5-Hydroxy-2-(3-hydroxy-4-methoxyphenyl)-4-oxo-4H-chromen-7-yl β-D-glucopyranosiduronic acid	MOPC-β-D-GlcA	[M+H]+	7.29	477.106	C22H20O12	XCKMDTYMOHXUHG-UHFFFAOYNA-N	0.00551501	0	0	11290.7	0	0	2695.73	0	0
	neg_865	Luteolin	Luteolin	[M-H]-	7.31	285.039	C15H10O6	IQPNAANSBPBGFQ-UHFFFAOYSA-N	0.0368547	0.0395279	0.0373735	75451.3	77631	66472.7	13864.2	2805.08	1971.14
Isoflavone	neg_802	3-(4-Methoxyphenyl)-4-oxo-4H-chromen-7-yl 4-O-(carboxyacetyl)-β-D-glucopyranoside	MCCA-β-D-Glc	[M-H]-	0.6	267.071	C25H24O12	QMHKWODSZRYFTD-FSIWAFGDSA-N	0.0134943	0.0166037	0.0151651	27626.3	32609	26972.7	2161.51	1156.23	167.285
	neg_808	Genistein	Genistein	[M-H]-	4.33	269.103	C15H10O5	TZBJGXHYKVUXJN-UHFFFAOYSA-N	0.0273629	0.0687479	0.0585907	56019	135018	104210	3041.57	9461.17	11990.9
	neg_859	Prunetin	Prunetin	[M-C6H10O5-H]-	0.75	283.104	C16H12O5	KQMVAGISDHMXJJ-UHFFFAOYSA-N	0.00830035	0.0291962	0.0179137	16993	57340	31861.3	1732.41	2506.27	2382.26
	neg_1285	Ononin	Ononin	[M-H]-	7.26	429.117	C22H22O9	MGJLSBDCWOSMHL-UHFFFAOYNA-N	0.012566	0	0	25726	0	0	8020.38	0	0
	neg_1314	Biochanin A-β-D-glucoside	BA-β-D-G	[M-H]-	0.75	445.12	C22H22O10	LFEUICHQZGNOHD-RECXWPGBSA-N	0	0.012538	0	0	24624	0	0	1737.89	0
	neg_1413	Isoflavonoid O-glycosides	IF O-G	[M-H]-	6.66	517.099	C24H22O13	FRAUJUKWSKMNJY-UHFFFAOYNA-N	0	0	0.00700568	0	0	12460.3	0	0	1159.53
	pos_548	Tectorigenin	Tectorigenin	[M-H]-	7.52	301.071	C16H12O6	OBBCRPUNCUPUOS-UHFFFAOYSA-N	0.0343423	0.0229976	0.0276352	70307.7	45166.3	49152	5153.48	5786.35	6011.05
	pos_1057	Malonyldaidzin	Malonyldaidzin	[M+H]+	7.46	503.123	C24H22O12	MTXMHWSVSZKYBT-UHFFFAOYNA-N	0.00890718	0.00771249	0.0098598	18235.3	15147	17536.7	1786.64	2281.75	734.401
Flavonol	neg_912	Kaempferide	Kaempferide	[M-H]-	8.2	299.056	C16H12O6	SQFSKOYWJBQGKQ-UHFFFAOYSA-N	0	0.0132584	0.0124268	0	26039	22102.3	0	3621.86	2133.15
	neg_1139	Bonanzin	Bonanzin	[M-H]-	7.41	373.093	C19H18O8	SDTFURCSGWUESP-UHFFFAOYSA-N	0.0065021	0.00650065	0.00821656	13311.5	12767	14614	1310.27	735.391	89.0955
	neg_1315	kaempferol 7-O-β-D-glucopyranoside	KF 7-O-β-D-Glc	[M-H2O-H]-	5.57	447.092	C21H19O11	YPWHZCPMOQGCDQ-HMGRVEAOSA-N	0.00853237	0	0	17468	0	0	841.457	0	0
	neg_1467	Tiliroside	Tiliroside	[M-H]-	8.21	593.13	C30H26O13	DVGGLGXQSFURLP-VWMSDXGPSA-N	0.0070937	0.00615772	0	14522.7	12093.5	0	734.763	968.029	0
	pos_504	Kaempferol	Kaempferol	[M-H]-	7.32	287.055	C15H10O6	IYRMWMYZSQPJKC-UHFFFAOYSA-N	0.00159351	0	0	3262.33	0	0	342.231	0	0
	pos_585	Isorhamnetin	Isorhamnetin	[M+H]+	6.77	317.066	C16H12O7	IZQSVPBOUDKVDZ-UHFFFAOYSA-N	0.013949	0.0077276	0.0113861	28557.3	15176.7	20251.3	986.461	1721.79	2139.11
	pos_978	Kaempferol-3-Glucuronide	KF-3-GlcA	[M+NH4]+	6.15	463.091	C21H18O12	FNTJVYCFNVUBOL-ZUGPOPFOSA-N	0.00907089	0	0	18570.5	0	0	755.897	0	0
	pos_1413	5-[3-(α-L-glycero-Hexopyranosyloxy)-5,7-dihydroxy-4-oxo-4H-chromen-2-yl]-2,3-dihydroxyphenyl α-L-erythro-hexopyranoside	α-L-GHCHPEH	[M+H]+	12.66	643.144	C27H30O18	FEWRYXXFMHQZRI-UHFFFAOYNA-N	0.0038637	0	0	7910	0	0	483.661	0	0
	pos_1633	2-(3,4-Dihydroxyphenyl)-5,7-dihydroxy-4-oxo-4H-chromen-3-yl β-D-xylopyranosyl-(1->2)-β-D-glucopyranosyl-(1->3)-β-D-glucopyranoside	R-β-D-xyl-β-D-Glc	[M+Na]+	7.06	759.206	C32H38O21	RWMOXJYSVNRRGE-UKBOIMOLSA-N	0.031694	0	0	64886	0	0	6155.55	0	0
Xanthone	neg_1268	Mangiferin	Mangiferin	[M-H]-	10.34	421.08	C19H18O11	AEDDIBAIWPIIBD-ZJKJAXBQSA-N	0.00667819	0.00610434	0.00570129	13672	11988.7	10140.3	503.256	910.144	654.444
	neg_1296	Irisxanthone	Irisxanthone	[M-H]-	5.13	435.094	C20H20O11	MTQVPZUZBBTLNO-HSLVGEKZSA-N	0.018733	0.0163234	0.0155467	38351.3	32058.4	27651.3	1256.73	4245.39	1417.06
Chalcone	neg_816	Naringenin chalcone	NC	[M+H]+	7.41	272.253	C15H12O5	YQHMWTPYORBCMF-ZZXKWVIFSA-N	0.00934142	0.00748574	0.00751713	19124.3	14701.7	13370	1974.61	1093.71	2372.44
Cyanidin	neg_865	7-hydroxyflavonoids	7-HF	[M+H]+	7.31	285.039	C15H11O6	VEVZSMAEJFVWIL-UHFFFAOYSA-O	0.0244794	0.0327388	0.0504924	50115.7	64297.7	89806	15143.5	10421.2	5440.78
Dihydroflavonol	neg_923	Taxifolin	Taxifolin	[M-2H]-	0.62	303.047	C15H12O7	CXQWRCVTCMQVQX-UHFFFAOYNA-N	0.000537791	0.00067364	0.02187	1101	1323	38898	0	0	3075.91
