# Supplementary material for: Integrated metabolome and transcriptome revealed the flavonoid biosynthetic pathway in developing Vernonia amygdalina leaves
Source: PeerJ. 2021 Apr 26;9:e11239. doi: 10.7717/peerj.11239 (PMC8083182; doi:10.7717/peerj.11239)
Supplement: Supplemental Information 6 [file peerj-09-11239-s006.xlsx]

## Sheet: Table S3
Supplementary Table S3 The function annotations of genes generated from Vernonia amygdalina leaves.
	Length	Tair_id	tair_annotation	Nr.ID	Nr.annotation	Swissprot.ID	Swissprot.annotation	KOG.Protein.or.Domain	KOG.ID	KOG.Function.Description	KO.ID	KEGG.Gene	GO.BiologicalProcess	GO.MolecularFunction	GO.CellularComponent
Unigene000001	343	--	--	--	--	--	--	--	--	--	--	--	-	-	-
Unigene000002	697	--	--	--	--	--	--	--	--	--	--	--	-	-	-
Unigene000003	241	--	--	--	--	--	--	--	--	--	--	--	-	-	-
Unigene000004	343	--	--	--	--	--	--	--	--	--	--	--	-	-	-
Unigene000005	451	AT2G23170.1	Auxin-responsive GH3 family protein|Chr2:9864125-9866502 REVERSE LENGTH=595	KVI08942.1	GH3 auxin-responsive promoter [Cynara cardunculus var. scolymus]	sp|O22190|GH33_ARATH	Indole-3-acetic acid-amido synthetase GH3.3 OS=Arabidopsis thaliana GN=GH3.3 PE=1 SV=1	--	--	--	K14487//auxin responsive GH3 gene family	vvi:100250868	-	-	-
Unigene000006	658	--	--	--	--	--	--	--	--	--	--	--	-	-	-
Unigene000007	475	--	--	--	--	--	--	--	--	--	--	--	-	-	-
Unigene000008	426	--	--	--	--	--	--	--	--	--	--	--	-	-	-
Unigene000009	380	--	--	KVH98882.1	Glucose/ribitol dehydrogenase [Cynara cardunculus var. scolymus]	sp|Q5C9I9|ISPD_MENPI	(-)-isopiperitenol/(-)-carveol dehydrogenase, mitochondrial OS=Mentha piperita PE=1 SV=1	At2g47150	KOG0725	Reductases with broad range of substrate specificities	--	--	-	-	-
Unigene000010	224	--	--	KVH93998.1	Protein kinase, catalytic domain-containing protein [Cynara cardunculus var. scolymus]	--	--	--	--	--	--	--	-	-	-
Unigene000011	432	--	--	--	--	--	--	--	--	--	--	--	-	-	-
Unigene000012	234	--	--	--	--	--	--	--	--	--	--	--	-	-	-
Unigene000013	265	--	--	--	--	--	--	--	--	--	--	--	-	-	-
Unigene000014	384	AT1G11040.1	HSP40/DnaJ peptide-binding protein|Chr1:3679225-3680924 REVERSE LENGTH=438	XP_015078889.1	PREDICTED: dnaJ homolog subfamily B member 4 [Solanum pennellii]	sp|Q9D832|DNJB4_MOUSE	DnaJ homolog subfamily B member 4 OS=Mus musculus GN=Dnajb4 PE=1 SV=1	At1g11040	KOG0714	Molecular chaperone (DnaJ superfamily)	K09519//DnaJ homolog subfamily B member 13	sly:101263125	GO:0009987//cellular process	GO:0005515//protein binding;GO:0005488//binding	-
Unigene000015	719	AT1G64160.1	Disease resistance-responsive (dirigent-like protein) family protein|Chr1:23814063-23814611 FORWARD LENGTH=182	KVH95339.1	Plant disease resistance response protein [Cynara cardunculus var. scolymus]	sp|P13240|DR206_PEA	Disease resistance response protein 206 OS=Pisum sativum GN=PI206 PE=1 SV=2	--	--	--	--	--	-	-	-
Unigene000016	963	--	--	--	--	--	--	--	--	--	--	--	-	-	-
Unigene000017	579	--	--	--	--	--	--	--	--	--	--	--	-	-	-
Unigene000018	407	--	--	--	--	--	--	--	--	--	--	--	-	-	-
Unigene000019	208	--	--	--	--	--	--	--	--	--	--	--	-	-	-
Unigene000020	280	--	--	--	--	--	--	--	--	--	--	--	-	-	-
Unigene000021	259	--	--	--	--	--	--	--	--	--	--	--	-	-	-
Unigene000022	575	--	--	--	--	--	--	--	--	--	--	--	-	-	-
Unigene000023	224	--	--	--	--	--	--	--	--	--	--	--	-	-	-
Unigene000024	353	--	--	KYP66582.1	Retrovirus-related Pol polyprotein from transposon TNT 1-94 [Cajanus cajan]	--	--	At3g60170	KOG0017	FOG: Transposon-encoded proteins with TYA, reverse transcriptase, integrase domains in various combinations	--	--	-	-	-
Unigene000025	554	--	--	XP_015877784.1	PREDICTED: (R)-mandelonitrile lyase 1-like [Ziziphus jujuba]	--	--	At1g32590	KOG0017	FOG: Transposon-encoded proteins with TYA, reverse transcriptase, integrase domains in various combinations	--	--	-	-	-
Unigene000026	497	--	--	--	--	--	--	--	--	--	--	--	-	-	-
Unigene000027	242	--	--	--	--	--	--	--	--	--	--	--	-	-	-
Unigene000028	681	--	--	--	--	--	--	--	--	--	--	--	-	-	-
Unigene000029	409	--	--	--	--	--	--	--	--	--	--	--	-	-	-
Unigene000030	209	--	--	--	--	--	--	--	--	--	--	--	-	-	-
Unigene000031	335	--	--	--	--	--	--	--	--	--	--	--	-	-	-
Unigene000032	436	--	--	JAT47000.1	Nuclear protein 1, partial [Anthurium amnicola]	--	--	7297905	KOG4319	DNA-binding nuclear protein p8	--	--	-	-	-
Unigene000033	432	--	--	--	--	--	--	--	--	--	--	--	-	-	-
Unigene000034	528	--	--	--	--	--	--	--	--	--	--	--	-	-	-
Unigene000035	418	AT3G51520.1	diacylglycerol acyltransferase family|Chr3:19110739-19112518 FORWARD LENGTH=314	KVI08706.1	Diacylglycerol acyltransferase [Cynara cardunculus var. scolymus]	sp|Q9ASU1|DGAT2_ARATH	Diacylglycerol O-acyltransferase 2 OS=Arabidopsis thaliana GN=DGAT2 PE=2 SV=1	At3g51520	KOG0831	Acyl-CoA:diacylglycerol acyltransferase (DGAT)	K14457//2-acylglycerol O-acyltransferase 2 [EC:2.3.1.22]	bvg:104896112	-	-	-
Unigene000036	894	AT3G51520.1	diacylglycerol acyltransferase family|Chr3:19110739-19112518 FORWARD LENGTH=314	XP_016559155.1	PREDICTED: diacylglycerol O-acyltransferase 2 isoform X2 [Capsicum annuum]	sp|Q9ASU1|DGAT2_ARATH	Diacylglycerol O-acyltransferase 2 OS=Arabidopsis thaliana GN=DGAT2 PE=2 SV=1	At3g51520	KOG0831	Acyl-CoA:diacylglycerol acyltransferase (DGAT)	K14457//2-acylglycerol O-acyltransferase 2 [EC:2.3.1.22]	sot:102582278	-	-	-
Unigene000037	1519	AT4G18700.1	CBL-interacting protein kinase 12|Chr4:10289110-10290579 REVERSE LENGTH=489	KVH88569.1	NAF domain-containing protein [Cynara cardunculus var. scolymus]	sp|Q9SN43|CIPKC_ARATH	CBL-interacting serine/threonine-protein kinase 12 OS=Arabidopsis thaliana GN=CIPK12 PE=1 SV=1	At4g18700	KOG0583	Serine/threonine protein kinase	--	--	GO:0019538//protein metabolic process;GO:0044237//cellular metabolic process;GO:0044699//single-organism process;GO:0071704//organic substance metabolic process;GO:0009987//cellular process;GO:0007154//cell communication;GO:0044267//cellular protein metabolic process;GO:0006793//phosphorus metabolic process;GO:0008152//metabolic process;GO:0006796//phosphate-containing compound metabolic process;…	GO:0001883//purine nucleoside binding;GO:0004672//protein kinase activity;GO:0032550//purine ribonucleoside binding;GO:0097367//carbohydrate derivative binding;GO:0032549//ribonucleoside binding;GO:0097159//organic cyclic compound binding;GO:0001882//nucleoside binding;GO:0016301//kinase activity;GO:0003824//catalytic activity;GO:0036094//small molecule binding;GO:1901363//heterocyclic compound b…	GO:0016020//membrane;GO:0044425//membrane part;GO:0031224//intrinsic component of membrane
Unigene000038	692	--	--	--	--	--	--	--	--	--	--	--	-	-	-
Unigene000039	234	--	--	--	--	--	--	--	--	--	--	--	-	-	-
Unigene000040	731	--	--	--	--	--	--	--	--	--	--	--	-	-	-
Unigene000041	250	--	--	--	--	--	--	--	--	--	--	--	-	-	-
Unigene000042	288	--	--	--	--	--	--	--	--	--	--	--	-	-	-
Unigene000043	360	--	--	--	--	--	--	--	--	--	--	--	-	-	-
Unigene000044	413	--	--	EOY21478.1	DNA/RNA polymerases superfamily protein [Theobroma cacao]	sp|P10401|POLY_DROME	Retrovirus-related Pol polyprotein from transposon gypsy OS=Drosophila melanogaster GN=pol PE=3 SV=1	At2g14650	KOG0017	FOG: Transposon-encoded proteins with TYA, reverse transcriptase, integrase domains in various combinations	--	--	GO:0008152//metabolic process;GO:0009987//cellular process;GO:0043170//macromolecule metabolic process;GO:0006259//DNA metabolic process;GO:0034641//cellular nitrogen compound metabolic process;GO:0046483//heterocycle metabolic process;GO:0071704//organic substance metabolic process;GO:0006725//cellular aromatic compound metabolic process;GO:0044238//primary metabolic process;GO:0044260//cellular…	GO:0046872//metal ion binding;GO:0005488//binding;GO:0046914//transition metal ion binding;GO:0043167//ion binding;GO:0043169//cation binding	-
Unigene000045	406	--	--	--	--	--	--	--	--	--	--	--	-	-	-
Unigene000046	689	--	--	KVI11146.1	hypothetical protein Ccrd_010448 [Cynara cardunculus var. scolymus]	--	--	--	--	--	--	--	-	-	-
Unigene000047	809	--	--	--	--	--	--	--	--	--	--	--	-	-	-
Unigene000048	266	--	--	--	--	--	--	--	--	--	--	--	-	-	-
Unigene000049	358	--	--	--	--	--	--	--	--	--	--	--	-	-	-
Unigene000050	638	AT5G10620.2	methyltransferase|Chr5:3355466-3356615 REVERSE LENGTH=193	KVI09545.1	SPOUT methyltransferase, predicted [Cynara cardunculus var. scolymus]	--	--	--	--	--	K00783//23S rRNA (pseudouridine1915-N3)-methyltransferase [EC:2.1.1.177]	tcc:TCM_036796	-	-	-
Unigene000051	328	--	--	BAJ33519.1	CACTA transposable element [Dahlia pinnata]	--	--	--	--	--	--	--	-	-	-
Unigene000052	421	--	--	BAJ33519.1	CACTA transposable element [Dahlia pinnata]	--	--	--	--	--	--	--	-	-	-
Unigene000053	330	--	--	--	--	--	--	--	--	--	--	--	-	-	-
Unigene000054	512	--	--	--	--	--	--	--	--	--	--	--	-	-	-
Unigene000055	354	--	--	--	--	--	--	--	--	--	--	--	-	-	-
Unigene000056	341	--	--	--	--	--	--	--	--	--	--	--	-	-	-
Unigene000057	291	--	--	KVI06482.1	hypothetical protein Ccrd_015179 [Cynara cardunculus var. scolymus]	--	--	--	--	--	--	--	-	-	-
Unigene000058	237	--	--	--	--	--	--	--	--	--	--	--	-	-	-
Unigene000059	236	--	--	--	--	--	--	--	--	--	--	--	-	-	-
Unigene000060	411	--	--	--	--	--	--	--	--	--	--	--	-	-	-
Unigene000061	945	--	--	--	--	--	--	--	--	--	--	--	-	-	-
Unigene000062	201	--	--	--	--	--	--	--	--	--	--	--	-	-	-
Unigene000063	240	--	--	XP_016457243.1	PREDICTED: sialidase-like isoform X3 [Nicotiana tabacum]	--	--	--	--	--	--	--	-	-	-
Unigene000064	347	--	--	KVH92642.1	Armadillo-like helical, partial [Cynara cardunculus var. scolymus]	sp|Q9SRU2|BIG_ARATH	Auxin transport protein BIG OS=Arabidopsis thaliana GN=BIG PE=1 SV=2	At3g02260	KOG1776	Zn-binding protein Push	K10691//E3 ubiquitin-protein ligase UBR4 [EC:2.3.2.27]	vvi:100256705	GO:0032502//developmental process;GO:0044699//single-organism process;GO:0048856//anatomical structure development;GO:0044767//single-organism developmental process	-	-
Unigene000065	370	--	--	--	--	--	--	--	--	--	--	--	-	-	-
Unigene000066	246	--	--	--	--	--	--	--	--	--	--	--	-	-	-
Unigene000067	234	--	--	--	--	--	--	--	--	--	--	--	-	-	-
Unigene000068	231	--	--	--	--	--	--	--	--	--	--	--	-	-	-
Unigene000069	219	--	--	--	--	--	--	--	--	--	--	--	-	-	-
Unigene000070	585	--	--	--	--	--	--	--	--	--	--	--	-	-	-
Unigene000071	468	--	--	--	--	--	--	--	--	--	--	--	-	-	-
Unigene000072	205	--	--	--	--	--	--	--	--	--	--	--	-	-	-
Unigene000073	431	--	--	--	--	--	--	--	--	--	--	--	-	-	-
Unigene000074	545	--	--	--	--	--	--	--	--	--	--	--	-	-	-
Unigene000075	267	--	--	--	--	--	--	--	--	--	--	--	-	-	-
Unigene000076	453	--	--	--	--	--	--	--	--	--	--	--	-	-	-
Unigene000077	259	--	--	--	--	--	--	--	--	--	--	--	-	-	-
Unigene000078	262	--	--	--	--	--	--	--	--	--	--	--	-	-	-
Unigene000079	246	--	--	JAU33129.1	Retrovirus-related Pol polyprotein from transposon TNT 1-94, partial [Noccaea caerulescens]	--	--	At1g32590	KOG0017	FOG: Transposon-encoded proteins with TYA, reverse transcriptase, integrase domains in various combinations	K12604//CCR4-NOT transcription complex subunit 1	vvi:100259605	-	-	-
Unigene000080	204	--	--	KYP58383.1	Retrovirus-related Pol polyprotein from transposon TNT 1-94, partial [Cajanus cajan]	sp|P10978|POLX_TOBAC	Retrovirus-related Pol polyprotein from transposon TNT 1-94 OS=Nicotiana tabacum PE=2 SV=1	At2g15650	KOG0017	FOG: Transposon-encoded proteins with TYA, reverse transcriptase, integrase domains in various combinations	--	--	-	-	-
Unigene000081	1198	AT1G50920.1	Nucleolar GTP-binding protein|Chr1:18870555-18872570 FORWARD LENGTH=671	XP_007767148.1	GTP binding protein 4 [Coniophora puteana RWD-64-598 SS2]// EIW83366.1 GTP binding protein 4 [Coniophora puteana RWD-64-598 SS2]	sp|Q02892|NOG1_YEAST	Nucleolar GTP-binding protein 1 OS=Saccharomyces cerevisiae (strain ATCC 204508 / S288c) GN=NOG1 PE=1 SV=1	YPL093w	KOG1490	GTP-binding protein CRFG/NOG1 (ODN superfamily)	K06943//nucleolar GTP-binding protein	mdm:103409453	GO:0044085//cellular component biogenesis;GO:0022613//ribonucleoprotein complex biogenesis;GO:0071840//cellular component organization or biogenesis	-	GO:0031981//nuclear lumen;GO:0044464//cell part;GO:0043231//intracellular membrane-bounded organelle;GO:0043227//membrane-bounded organelle;GO:0005622//intracellular;GO:0043226//organelle;GO:0044446//intracellular organelle part;GO:0043229//intracellular organelle;GO:0043233//organelle lumen;GO:0044424//intracellular part;GO:0070013//intracellular organelle lumen;GO:0044422//organelle part;GO:000…
Unigene000082	333	--	--	--	--	--	--	--	--	--	--	--	-	-	-
Unigene000083	669	--	--	--	--	--	--	--	--	--	--	--	-	-	-
Unigene000084	342	--	--	--	--	--	--	--	--	--	--	--	-	-	-
Unigene000085	221	--	--	--	--	--	--	--	--	--	--	--	-	-	-
Unigene000086	225	--	--	KVI10720.1	Organ specific protein [Cynara cardunculus var. scolymus]	sp|P17772|OSS2_PEA	Organ-specific protein S2 OS=Pisum sativum PE=2 SV=1	--	--	--	--	--	-	-	-
Unigene000087	248	--	--	KVI10720.1	Organ specific protein [Cynara cardunculus var. scolymus]	sp|P17772|OSS2_PEA	Organ-specific protein S2 OS=Pisum sativum PE=2 SV=1	--	--	--	--	--	-	-	-
Unigene000088	240	--	--	--	--	--	--	--	--	--	--	--	-	-	-
Unigene000089	361	--	--	--	--	--	--	--	--	--	--	--	-	-	-
Unigene000090	352	--	--	--	--	--	--	--	--	--	--	--	-	-	-
Unigene000091	396	--	--	--	--	--	--	--	--	--	--	--	-	-	-
Unigene000092	295	--	--	--	--	--	--	--	--	--	--	--	-	-	-
Unigene000093	392	--	--	--	--	--	--	--	--	--	--	--	-	-	-
Unigene000094	215	--	--	--	--	--	--	--	--	--	--	--	-	-	-
Unigene000095	321	--	--	--	--	--	--	--	--	--	--	--	-	-	-
Unigene000096	683	--	--	--	--	--	--	--	--	--	--	--	-	-	-
Unigene000097	685	--	--	--	--	--	--	--	--	--	--	--	-	-	-
Unigene000098	245	--	--	--	--	--	--	--	--	--	--	--	-	-	-
Unigene000099	575	--	--	--	--	--	--	--	--	--	--	--	-	-	-
Unigene000100	271	--	--	--	--	--	--	--	--	--	--	--	-	-	-
Unigene000101	237	AT5G61380.1	CCT motif -containing response regulator protein|Chr5:24675540-24678176 FORWARD LENGTH=618	KVH98515.1	CCT domain-containing protein [Cynara cardunculus var. scolymus]	sp|Q9LKL2|APRR1_ARATH	Two-component response regulator-like APRR1 OS=Arabidopsis thaliana GN=APRR1 PE=1 SV=1	At5g61380	KOG1601	GATA-4/5/6 transcription factors	K12127//pseudo-response regulator 1	cmo:103487922	-	-	-
Unigene000102	237	--	--	--	--	--	--	--	--	--	--	--	-	-	-
Unigene000103	306	AT3G06240.1	F-box family protein|Chr3:1887336-1888619 FORWARD LENGTH=427	KVH88881.1	F-box associated interaction domain-containing protein [Cynara cardunculus var. scolymus]	sp|Q8GXC7|FBK50_ARATH	F-box/kelch-repeat protein At3g06240 OS=Arabidopsis thaliana GN=At3g06240 PE=2 SV=1	--	--	--	--	--	-	-	-
Unigene000104	304	AT3G23880.1	F-box and associated interaction domains-containing protein|Chr3:8622061-8623155 REVERSE LENGTH=364	KVH88881.1	F-box associated interaction domain-containing protein [Cynara cardunculus var. scolymus]	--	--	--	--	--	--	--	-	-	-
Unigene000105	432	AT5G18600.1	Thioredoxin superfamily protein|Chr5:6183466-6183774 REVERSE LENGTH=102	KVI00933.1	Glutaredoxin [Cynara cardunculus var. scolymus]	sp|Q8L8Z8|GRXS2_ARATH	Monothiol glutaredoxin-S2 OS=Arabidopsis thaliana GN=GRXS2 PE=3 SV=1	At5g18600	KOG1752	Glutaredoxin and related proteins	K03676//glutaredoxin 3	tcc:TCM_004554	-	-	-
Unigene000106	570	--	--	--	--	--	--	--	--	--	--	--	-	-	-
Unigene000107	365	--	--	--	--	--	--	--	--	--	--	--	-	-	-
Unigene000108	210	--	--	--	--	--	--	--	--	--	--	--	-	-	-
Unigene000109	262	--	--	KYP65845.1	Transposon TX1 uncharacterized, partial [Cajanus cajan]	--	--	--	--	--	--	--	-	-	-
Unigene000110	272	--	--	KHN27546.1	LINE-1 reverse transcriptase like, partial [Glycine soja]	--	--	--	--	--	--	--	-	-	-
Unigene000111	741	AT3G18020.1	Pentatricopeptide repeat (PPR) superfamily protein|Chr3:6165449-6167515 FORWARD LENGTH=688	KVI01449.1	Pentatricopeptide repeat-containing protein [Cynara cardunculus var. scolymus]	sp|Q9LSK8|PP240_ARATH	Pentatricopeptide repeat-containing protein At3g18020 OS=Arabidopsis thaliana GN=At3g18020 PE=2 SV=1	At3g18020	KOG4197	FOG: PPR repeat	--	--	-	-	-
Unigene000112	431	--	--	JAU28342.1	Retrovirus-related Pol polyprotein from transposon TNT 1-94, partial [Noccaea caerulescens]	--	--	At1g32590	KOG0017	FOG: Transposon-encoded proteins with TYA, reverse transcriptase, integrase domains in various combinations	--	--	-	-	-
Unigene000113	637	AT2G31940.1	oxidoreductase/transition metal ion-binding protein|Chr2:13580600-13580962 FORWARD LENGTH=120	CDX88869.1	BnaA03g07800D [Brassica napus]	--	--	--	--	--	--	--	-	-	-
Unigene000114	313	--	--	KZV25122.1	DNA/RNA polymerase superfamily protein [Dorcoceras hygrometricum]	sp|Q7LHG5|YI31B_YEAST	Transposon Ty3-I Gag-Pol polyprotein OS=Saccharomyces cerevisiae (strain ATCC 204508 / S288c) GN=TY3B-I PE=3 SV=2	At2g10780	KOG0017	FOG: Transposon-encoded proteins with TYA, reverse transcriptase, integrase domains in various combinations	--	--	-	-	-
Unigene000115	274	--	--	--	--	--	--	--	--	--	--	--	-	-	-
Unigene000116	285	--	--	--	--	--	--	--	--	--	--	--	-	-	-
Unigene000117	209	--	--	--	--	--	--	--	--	--	--	--	-	-	-
Unigene000118	530	AT1G62280.1	SLAC1 homologue 1|Chr1:23007309-23008540 REVERSE LENGTH=385	KVI09381.1	C4-dicarboxylate transporter/malic acid transport protein [Cynara cardunculus var. scolymus]	sp|Q5E930|SLAH1_ARATH	S-type anion channel SLAH1 OS=Arabidopsis thaliana GN=SLAH1 PE=2 SV=1	--	--	--	--	--	-	-	-
Unigene000119	205	--	--	--	--	--	--	--	--	--	--	--	-	-	-
Unigene000120	308	--	--	--	--	--	--	--	--	--	--	--	-	-	-
Unigene000121	504	--	--	BAK64102.1	gag-pol polyprotein [Eustoma exaltatum subsp. russellianum]	--	--	At1g36620	KOG0017	FOG: Transposon-encoded proteins with TYA, reverse transcriptase, integrase domains in various combinations	--	--	-	-	-
Unigene000122	410	--	--	--	--	--	--	--	--	--	--	--	-	-	-
Unigene000123	457	--	--	--	--	--	--	--	--	--	--	--	-	-	-
Unigene000124	217	--	--	--	--	--	--	--	--	--	--	--	-	-	-
Unigene000125	276	--	--	AAQ73141.1	resistance protein RGC2, partial [Lactuca saligna]	--	--	--	--	--	--	--	-	-	-
Unigene000126	297	--	--	--	--	--	--	--	--	--	--	--	-	-	-
Unigene000127	542	--	--	--	--	--	--	--	--	--	--	--	-	-	-
Unigene000128	353	--	--	--	--	--	--	--	--	--	--	--	-	-	-
Unigene000129	857	--	--	--	--	--	--	--	--	--	--	--	-	-	-
Unigene000130	348	--	--	--	--	--	--	--	--	--	--	--	-	-	-
Unigene000131	396	--	--	--	--	--	--	--	--	--	--	--	-	-	-
Unigene000132	341	--	--	--	--	--	--	--	--	--	--	--	-	-	-
Unigene000133	403	AT3G51690.1	PIF1 helicase|Chr3:19176731-19178107 REVERSE LENGTH=331	XP_020091122.1	ATP-dependent DNA helicase PIF1-like [Ananas comosus]	--	--	At2g05640	KOG0987	DNA helicase PIF1/RRM3	--	--	GO:0009987//cellular process	GO:0004386//helicase activity;GO:0016462//pyrophosphatase activity;GO:0003824//catalytic activity;GO:0016818//hydrolase activity, acting on acid anhydrides, in phosphorus-containing anhydrides;GO:0016787//hydrolase activity;GO:0017111//nucleoside-triphosphatase activity;GO:0016817//hydrolase activity, acting on acid anhydrides	-
Unigene000134	585	AT5G66440.1	tRNA-methyltransferase non-catalytic subunit trm6MTase subunit|Chr5:26530274-26531032 REVERSE LENGTH=252	CDY57650.1	BnaAnng14910D [Brassica napus]	--	--	--	--	--	--	--	-	-	-
Unigene000135	230	--	--	--	--	--	--	--	--	--	--	--	-	-	-
Unigene000136	343	--	--	--	--	--	--	--	--	--	--	--	-	-	-
Unigene000137	249	--	--	KVI03148.1	Endonuclease/exonuclease/phosphatase [Cynara cardunculus var. scolymus]	--	--	--	--	--	--	--	-	-	-
Unigene000138	403	--	--	--	--	--	--	--	--	--	--	--	-	-	-
Unigene000139	409	--	--	KVH96764.1	Endonuclease/exonuclease/phosphatase [Cynara cardunculus var. scolymus]	--	--	--	--	--	--	--	-	-	-
Unigene000140	512	--	--	--	--	--	--	--	--	--	--	--	-	-	-
Unigene000141	266	--	--	ABG37667.2	transposase tnp2, partial [Populus trichocarpa]	--	--	--	--	--	--	--	-	-	-
Unigene000142	359	--	--	--	--	--	--	--	--	--	--	--	-	-	-
Unigene000143	288	AT5G66900.3	Disease resistance protein (CC-NBS-LRR class) family|Chr5:26715845-26717901 REVERSE LENGTH=591	KVH87519.1	Disease resistance protein [Cynara cardunculus var. scolymus]	sp|Q9FKZ1|DRL42_ARATH	Probable disease resistance protein At5g66900 OS=Arabidopsis thaliana GN=At5g66900 PE=3 SV=1	At1g61190	KOG4658	Apoptotic ATPase	--	--	-	-	-
Unigene000144	229	--	--	--	--	--	--	--	--	--	--	--	-	-	-
Unigene000145	451	--	--	--	--	--	--	--	--	--	--	--	-	-	-
Unigene000146	716	AT5G25450.1	Cytochrome bd ubiquinol oxidase%2C 14kDa subunit|Chr5:8857036-8857849 FORWARD LENGTH=122	KVI11636.1	cytochrome b-c1 complex subunit 7 [Cynara cardunculus var. scolymus]	sp|F4JWS8|QCR72_ARATH	Cytochrome b-c1 complex subunit 7-2 OS=Arabidopsis thaliana GN=QCR7-2 PE=1 SV=1	At5g25450	KOG3440	Ubiquinol cytochrome c reductase, subunit QCR7	K00417//ubiquinol-cytochrome c reductase subunit 7	atr:18448800	GO:0044763//single-organism cellular process;GO:0045333//cellular respiration;GO:0022900//electron transport chain;GO:0055114//oxidation-reduction process;GO:0022904//respiratory electron transport chain;GO:0044710//single-organism metabolic process;GO:0006091//generation of precursor metabolites and energy;GO:0044237//cellular metabolic process;GO:0009987//cellular process;GO:0044699//single-org…	GO:0015077//monovalent inorganic cation transmembrane transporter activity;GO:0005215//transporter activity;GO:0015075//ion transmembrane transporter activity;GO:0022892//substrate-specific transporter activity;GO:0022857//transmembrane transporter activity;GO:0022890//inorganic cation transmembrane transporter activity;GO:0015078//hydrogen ion transmembrane transporter activity;GO:0022891//subst…	GO:0005739//mitochondrion;GO:0005737//cytoplasm;GO:0044464//cell part;GO:0043231//intracellular membrane-bounded organelle;GO:0043229//intracellular organelle;GO:0044444//cytoplasmic part;GO:0044424//intracellular part;GO:0005623//cell;GO:0005622//intracellular;GO:0043227//membrane-bounded organelle;GO:0043226//organelle
Unigene000147	415	--	--	--	--	--	--	--	--	--	--	--	-	-	-
Unigene000148	758	--	--	--	--	--	--	--	--	--	--	--	-	-	-
Unigene000149	754	--	--	--	--	--	--	--	--	--	--	--	-	-	-
Unigene000150	225	--	--	XP_015072012.1	PREDICTED: kinesin-4 [Solanum pennellii]	--	--	--	--	--	K10406//kinesin family member C2/C3	sly:101249066	-	-	-
Unigene000151	1696	AT4G35920.5	PLAC8 family protein|Chr4:17012106-17014192 REVERSE LENGTH=421	XP_002272810.2	PREDICTED: protein MID1-COMPLEMENTING ACTIVITY 1 [Vitis vinifera]	sp|Q8L7E9|MCAC1_ARATH	Protein MID1-COMPLEMENTING ACTIVITY 1 OS=Arabidopsis thaliana GN=MCA1 PE=1 SV=1	--	--	--	--	--	-	-	-
Unigene000152	403	AT3G29750.1	Eukaryotic aspartyl protease family protein|Chr3:11579125-11580600 REVERSE LENGTH=421	KYP32370.1	Retrovirus-related Pol polyprotein from transposon opus [Cajanus cajan]	--	--	--	--	--	--	--	-	-	-
Unigene000153	201	AT1G21140.1	Vacuolar iron transporter (VIT) family protein|Chr1:7404464-7405066 FORWARD LENGTH=200	XP_008370515.1	PREDICTED: vacuolar iron transporter homolog 4-like [Malus domestica]	sp|Q9LPU9|VITH1_ARATH	Vacuolar iron transporter homolog 1 OS=Arabidopsis thaliana GN=At1g21140 PE=2 SV=1	At1g21140	KOG4473	Uncharacterized membrane protein	--	--	-	-	GO:0031224//intrinsic component of membrane;GO:0044425//membrane part;GO:0016020//membrane
Unigene000154	207	AT1G04110.1	Subtilase family protein|Chr1:1061457-1063784 REVERSE LENGTH=775	KVH90040.1	Peptidase S8/S53 domain-containing protein [Cynara cardunculus var. scolymus]	sp|O64495|SBT12_ARATH	Subtilisin-like protease SBT1.2 OS=Arabidopsis thaliana GN=SBT1.2 PE=2 SV=1	--	--	--	--	--	-	-	-
Unigene000155	222	--	--	--	--	--	--	--	--	--	--	--	-	-	-
Unigene000156	250	AT2G16360.1	40S ribosomal protein S25|Chr2:7076713-7077310 REVERSE LENGTH=109	JAT43960.1	40S ribosomal protein S25, partial [Anthurium amnicola]	sp|Q8ISN9|RS25_BRABE	40S ribosomal protein S25 OS=Branchiostoma belcheri GN=RPS25 PE=2 SV=1	Hs18546781	KOG1767	40S ribosomal protein S25	K02975//small subunit ribosomal protein S25e	atr:18444874	-	-	-
Unigene000157	296	--	--	--	--	--	--	--	--	--	--	--	-	-	-
Unigene000158	420	AT5G41980.1	nuclease|Chr5:16793765-16794889 FORWARD LENGTH=374	GAV84065.1	DDE_4 domain-containing protein [Cephalotus follicularis]	--	--	At5g41980	KOG4585	Predicted transposase	--	--	-	-	-
Unigene000159	420	AT5G28730.1	nuclease|Chr5:10779003-10780218 FORWARD LENGTH=296	GAV92358.1	DDE_4 domain-containing protein [Cephalotus follicularis]	--	--	At5g28730	KOG4585	Predicted transposase	--	--	-	-	-
Unigene000160	606	--	--	--	--	--	--	--	--	--	--	--	-	-	-
Unigene000161	208	--	--	--	--	--	--	--	--	--	--	--	-	-	-
Unigene000162	874	--	--	--	--	--	--	--	--	--	--	--	-	-	-
Unigene000163	237	AT1G11950.3	Transcription factor jumonji (jmjC) domain-containing protein|Chr1:4034747-4038310 REVERSE LENGTH=875	XP_010418217.1	PREDICTED: lysine-specific demethylase JMJ25-like [Camelina sativa]	sp|Q9SSE9|JMJ25_ARATH	Lysine-specific demethylase JMJ25 OS=Arabidopsis thaliana GN=JMJ25 PE=1 SV=1	At1g11950	KOG1356	Putative transcription factor 5qNCA, contains JmjC domain	K15601//lysine-specific demethylase 3 [EC:1.14.11.-]	aly:ARALYDRAFT_471347	-	-	-
Unigene000164	470	--	--	--	--	--	--	--	--	--	--	--	-	-	-
Unigene000165	226	--	--	KVH97283.1	Protein of unknown function DUF3133 [Cynara cardunculus var. scolymus]	--	--	--	--	--	--	--	-	-	-
Unigene000166	209	--	--	--	--	--	--	--	--	--	--	--	-	-	-
Unigene000167	369	--	--	KVH97342.1	NLE-like protein, partial [Cynara cardunculus var. scolymus]	--	--	--	--	--	K14855//ribosome assembly protein 4	cit:102619181	-	-	-
Unigene000168	201	--	--	KYP44575.1	LINE-1 reverse transcriptase isogeny, partial [Cajanus cajan]	--	--	--	--	--	--	--	-	-	-
Unigene000169	489	--	--	GAV57030.1	UBN2 domain-containing protein, partial [Cephalotus follicularis]	--	--	At1g32590	KOG0017	FOG: Transposon-encoded proteins with TYA, reverse transcriptase, integrase domains in various combinations	--	--	-	-	-
Unigene000170	296	--	--	--	--	--	--	--	--	--	--	--	-	-	-
Unigene000171	486	AT3G22880.2	DNA repair (Rad51) family protein|Chr3:8098080-8100740 REVERSE LENGTH=333	KVI01551.1	AAA+ ATPase domain-containing protein [Cynara cardunculus var. scolymus]	sp|Q96449|DMC1_SOYBN	Meiotic recombination protein DMC1 homolog OS=Glycine max PE=2 SV=1	At3g22880	KOG1434	Meiotic recombination protein Dmc1	K10872//meiotic recombination protein DMC1	csv:101221817	GO:0022414//reproductive process;GO:1903046//meiotic cell cycle process;GO:0071704//organic substance metabolic process;GO:0034641//cellular nitrogen compound metabolic process;GO:0043170//macromolecule metabolic process;GO:0071840//cellular component organization or biogenesis;GO:0000280//nuclear division;GO:0009987//cellular process;GO:0044237//cellular metabolic process;GO:0008152//metabolic p…	GO:0016817//hydrolase activity, acting on acid anhydrides;GO:1901363//heterocyclic compound binding;GO:0016818//hydrolase activity, acting on acid anhydrides, in phosphorus-containing anhydrides;GO:0016787//hydrolase activity;GO:0016462//pyrophosphatase activity;GO:0036094//small molecule binding;GO:0016887//ATPase activity;GO:0032549//ribonucleoside binding;GO:0001883//purine nucleoside binding;…	GO:0005623//cell;GO:0043227//membrane-bounded organelle;GO:0043226//organelle;GO:0005622//intracellular;GO:0044424//intracellular part;GO:0043229//intracellular organelle;GO:0043231//intracellular membrane-bounded organelle;GO:0044464//cell part
Unigene000172	235	AT3G47110.1	Leucine-rich repeat protein kinase family protein|Chr3:17347103-17350296 REVERSE LENGTH=1025	KVI06720.1	Concanavalin A-like lectin/glucanase, subgroup [Cynara cardunculus var. scolymus]	sp|C0LGT6|EFR_ARATH	LRR receptor-like serine/threonine-protein kinase EFR OS=Arabidopsis thaliana GN=EFR PE=1 SV=1	At3g19230	KOG0619	FOG: Leucine rich repeat	--	--	GO:0008152//metabolic process;GO:0009987//cellular process;GO:0044237//cellular metabolic process;GO:0006793//phosphorus metabolic process;GO:0006796//phosphate-containing compound metabolic process	-	GO:0016020//membrane
Unigene000173	207	--	--	KVI06697.1	Leucine-rich repeat-containing protein [Cynara cardunculus var. scolymus]	--	--	--	--	--	--	--	-	GO:0003824//catalytic activity;GO:0016740//transferase activity	-
Unigene000174	397	--	--	GAW03407.1	Protein SET [Lentinula edodes]	sp|Q01105|SET_HUMAN	Protein SET OS=Homo sapiens GN=SET PE=1 SV=3	Hs4506891	KOG1508	DNA replication factor/protein phosphatase inhibitor SET/SPR-2	--	--	-	-	-
Unigene000175	356	AT5G27280.1	Zim17-type zinc finger protein|Chr5:9617548-9618369 FORWARD LENGTH=212	KVH88722.1	Mitochondrial import protein TIM15 [Cynara cardunculus var. scolymus]	--	--	At5g27280	KOG3277	Uncharacterized conserved protein	--	--	-	-	-
Unigene000176	403	--	--	--	--	--	--	--	--	--	--	--	-	-	-
Unigene000177	436	--	--	--	--	--	--	--	--	--	--	--	-	-	-
Unigene000178	632	AT1G27410.1	DNA repair metallo-beta-lactamase family protein|Chr1:9517226-9518743 FORWARD LENGTH=422	KVG51517.1	DNA repair metallo-beta-lactamase, partial [Cynara cardunculus var. scolymus]	--	--	At1g27410	KOG1361	Predicted hydrolase involved in interstrand cross-link repair	K15341//DNA cross-link repair 1B protein [EC:3.1.-.-]	vvi:100263032	-	-	-
Unigene000179	264	--	--	--	--	--	--	--	--	--	--	--	-	-	-
Unigene000180	229	AT5G57670.2	Protein kinase superfamily protein|Chr5:23360531-23363694 REVERSE LENGTH=579	KVI01391.1	Concanavalin A-like lectin/glucanase, subgroup [Cynara cardunculus var. scolymus]	sp|Q5XF57|Y5576_ARATH	Probable receptor-like serine/threonine-protein kinase At5g57670 OS=Arabidopsis thaliana GN=At5g57670 PE=2 SV=1	At5g57670	KOG1187	Serine/threonine protein kinase	--	--	-	-	-
Unigene000181	220	--	--	--	--	--	--	--	--	--	--	--	-	-	-
Unigene000182	310	--	--	--	--	--	--	--	--	--	--	--	-	-	-
Unigene000183	437	--	--	--	--	--	--	--	--	--	--	--	-	-	-
Unigene000184	819	AT2G29130.1	laccase 2|Chr2:12525189-12527699 REVERSE LENGTH=573	KVH94647.1	Cupredoxin [Cynara cardunculus var. scolymus]	sp|O81081|LAC2_ARATH	Laccase-2 OS=Arabidopsis thaliana GN=LAC2 PE=2 SV=1	At2g29130	KOG1263	Multicopper oxidases	K05909//laccase [EC:1.10.3.2]	egu:105045644	GO:0006725//cellular aromatic compound metabolic process;GO:0044710//single-organism metabolic process;GO:0071704//organic substance metabolic process;GO:0044237//cellular metabolic process;GO:0044699//single-organism process;GO:0044763//single-organism cellular process;GO:0019748//secondary metabolic process;GO:0008152//metabolic process;GO:1901360//organic cyclic compound metabolic process;GO:0…	GO:0016682//oxidoreductase activity, acting on diphenols and related substances as donors, oxygen as acceptor;GO:0016679//oxidoreductase activity, acting on diphenols and related substances as donors;GO:0043167//ion binding;GO:0016491//oxidoreductase activity;GO:0005488//binding;GO:0003824//catalytic activity;GO:0043169//cation binding	GO:0005576//extracellular region
Unigene000185	335	--	--	--	--	--	--	--	--	--	--	--	-	-	-
Unigene000186	235	AT5G14390.1	alpha/beta-Hydrolases superfamily protein|Chr5:4637551-4639575 REVERSE LENGTH=369	XP_015070758.1	PREDICTED: alpha/beta hydrolase domain-containing protein 17B [Solanum pennellii]	--	--	At5g14390	KOG1552	Predicted alpha/beta hydrolase	--	--	-	-	-
Unigene000187	248	AT1G26500.1	Pentatricopeptide repeat (PPR) superfamily protein|Chr1:9158380-9159897 FORWARD LENGTH=505	EOY01727.1	Pentatricopeptide repeat (PPR) superfamily protein [Theobroma cacao]	sp|Q9SXD1|PPR91_ARATH	Pentatricopeptide repeat-containing protein At1g62670, mitochondrial OS=Arabidopsis thaliana GN=At1g62670 PE=3 SV=2	At1g26500	KOG4197	FOG: PPR repeat	--	--	-	-	-
Unigene000188	1551	AT3G48000.1	aldehyde dehydrogenase 2B4|Chr3:17717082-17719843 REVERSE LENGTH=538	KEQ89394.1	aldehyde dehydrogenase, allergen Cla h 10 [Aureobasidium pullulans EXF-150]// KEQ89394.1 aldehyde dehydrogenase, allergen Cla h 10 [Aureobasidium pullulans EXF-150]	sp|P41751|ALDH_ASPNG	Aldehyde dehydrogenase OS=Aspergillus niger GN=aldA PE=3 SV=1	SPAC9E9.09c	KOG2450	Aldehyde dehydrogenase	K00128//aldehyde dehydrogenase (NAD+) [EC:1.2.1.3]	gmx:100782019	GO:0044710//single-organism metabolic process;GO:0008152//metabolic process;GO:0044699//single-organism process	GO:0016491//oxidoreductase activity;GO:0016903//oxidoreductase activity, acting on the aldehyde or oxo group of donors;GO:0003824//catalytic activity	GO:0043231//intracellular membrane-bounded organelle;GO:0043229//intracellular organelle;GO:0044464//cell part;GO:0043227//membrane-bounded organelle;GO:0044444//cytoplasmic part;GO:0005623//cell;GO:0044424//intracellular part;GO:0043226//organelle;GO:0005737//cytoplasm;GO:0005622//intracellular
Unigene000189	276	--	--	--	--	--	--	--	--	--	--	--	-	-	-
Unigene000190	422	AT2G33690.1	Late embryogenesis abundant protein%2C group 6|Chr2:14252187-14252414 FORWARD LENGTH=75	KVI02717.1	Late embryogenesis abundant protein, LEA-18 [Cynara cardunculus var. scolymus]	--	--	--	--	--	--	--	-	-	-
Unigene000191	464	--	--	--	--	--	--	--	--	--	--	--	-	-	-
Unigene000192	202	AT4G04220.1	receptor like protein 46|Chr4:2033427-2035946 FORWARD LENGTH=811	KVH90892.1	Leucine-rich repeat-containing protein [Cynara cardunculus var. scolymus]	sp|C0LGJ1|Y1743_ARATH	Probable LRR receptor-like serine/threonine-protein kinase At1g74360 OS=Arabidopsis thaliana GN=At1g74360 PE=2 SV=1	At4g04220	KOG0619	FOG: Leucine rich repeat	--	--	-	-	-
Unigene000193	594	--	--	--	--	--	--	--	--	--	--	--	-	-	-
Unigene000194	234	--	--	--	--	--	--	--	--	--	--	--	-	-	-
Unigene000195	226	--	--	--	--	--	--	--	--	--	--	--	-	-	-
Unigene000196	270	--	--	--	--	--	--	--	--	--	--	--	-	-	-
Unigene000197	237	--	--	--	--	--	--	--	--	--	--	--	-	-	-
Unigene000198	1957	--	--	--	--	--	--	--	--	--	--	--	-	-	-
Unigene000199	228	--	--	--	--	--	--	--	--	--	--	--	-	-	-
Unigene000200	412	--	--	--	--	--	--	--	--	--	--	--	-	-	-
Unigene000201	223	--	--	--	--	--	--	--	--	--	--	--	-	-	-
Unigene000202	378	AT4G21820.1	binding / calmodulin binding protein|Chr4:11577558-11583871 FORWARD LENGTH=1255	KVH89621.1	Calponin homology domain-containing protein [Cynara cardunculus var. scolymus]	sp|F4I507|MYO3_ARATH	Myosin-3 OS=Arabidopsis thaliana GN=VIII-A PE=2 SV=1	At1g50360	KOG0160	Myosin class V heavy chain	K16743//abnormal spindle-like microcephaly-associated protein	vvi:104878611	-	-	-
Unigene000203	477	--	--	--	--	--	--	--	--	--	--	--	-	-	-
Unigene000204	369	--	--	--	--	--	--	--	--	--	--	--	-	-	-
Unigene000205	494	--	--	KVH94271.1	Non-heme dioxygenase N-terminal domain-containing protein, partial [Cynara cardunculus var. scolymus]	--	--	--	--	--	--	--	-	-	-
Unigene000206	495	AT1G10200.1	GATA type zinc finger transcription factor family protein|Chr1:3346677-3347763 REVERSE LENGTH=190	XP_011092491.1	PREDICTED: LIM domain-containing protein WLIM1-like [Sesamum indicum]	sp|P29675|SF3_HELAN	Pollen-specific protein SF3 OS=Helianthus annuus GN=SF3 PE=2 SV=1	At1g10200	KOG1700	Regulatory protein MLP and related LIM proteins	K09377//cysteine and glycine-rich protein	zma:541782	-	GO:0046872//metal ion binding;GO:0005488//binding;GO:0043167//ion binding;GO:0043169//cation binding	-
Unigene000207	453	--	--	--	--	--	--	--	--	--	--	--	-	-	-
Unigene000208	592	--	--	--	--	--	--	--	--	--	--	--	-	-	-
Unigene000209	255	AT1G34210.2	somatic embryogenesis receptor-like kinase 2|Chr1:12459078-12462752 FORWARD LENGTH=628	KVH90955.1	Leucine-rich repeat-containing protein [Cynara cardunculus var. scolymus]	sp|Q9XIC7|SERK2_ARATH	Somatic embryogenesis receptor kinase 2 OS=Arabidopsis thaliana GN=SERK2 PE=1 SV=1	At4g04220	KOG0619	FOG: Leucine rich repeat	--	--	-	-	-
Unigene000210	539	--	--	KZV24902.1	Zinc finger FYVE domain-containing protein 26 isoform 1 [Dorcoceras hygrometricum]	--	--	--	--	--	--	--	-	-	-
Unigene000211	275	--	--	--	--	--	--	--	--	--	--	--	-	-	-
Unigene000212	401	--	--	--	--	--	--	--	--	--	--	--	-	-	-
Unigene000213	556	AT1G65910.1	NAC domain containing protein 28|Chr1:24520933-24524108 REVERSE LENGTH=631	KVI08685.1	No apical meristem (NAM) protein [Cynara cardunculus var. scolymus]	sp|Q9FFI5|NAC86_ARATH	NAC domain-containing protein 86 OS=Arabidopsis thaliana GN=NAC086 PE=2 SV=1	At1g64100	KOG4197	FOG: PPR repeat	--	--	GO:0044271//cellular nitrogen compound biosynthetic process;GO:0006807//nitrogen compound metabolic process;GO:0090304//nucleic acid metabolic process;GO:0032774//RNA biosynthetic process;GO:0071704//organic substance metabolic process;GO:0018130//heterocycle biosynthetic process;GO:0034641//cellular nitrogen compound metabolic process;GO:0044260//cellular macromolecule metabolic process;GO:19013…	-	GO:0005623//cell;GO:0044424//intracellular part;GO:0043231//intracellular membrane-bounded organelle;GO:0043229//intracellular organelle;GO:0044464//cell part;GO:0043227//membrane-bounded organelle;GO:0005622//intracellular;GO:0043226//organelle
Unigene000214	244	--	--	--	--	--	--	--	--	--	--	--	-	-	-
Unigene000215	452	--	--	--	--	--	--	--	--	--	--	--	-	-	-
Unigene000216	329	--	--	--	--	--	--	--	--	--	--	--	-	-	-
Unigene000217	201	--	--	--	--	--	--	--	--	--	--	--	-	-	-
Unigene000218	234	--	--	--	--	--	--	--	--	--	--	--	-	-	-
Unigene000219	351	--	--	--	--	--	--	--	--	--	--	--	-	-	-
Unigene000220	299	AT5G56220.2	P-loop containing nucleoside triphosphate hydrolases superfamily protein|Chr5:22754871-22757792 FORWARD LENGTH=973	KVI10272.1	AAA+ ATPase domain-containing protein [Cynara cardunculus var. scolymus]	--	--	--	--	--	--	--	GO:0009987//cellular process;GO:0044699//single-organism process;GO:0007154//cell communication;GO:0044763//single-organism cellular process	GO:0001883//purine nucleoside binding;GO:0097159//organic cyclic compound binding;GO:0036094//small molecule binding;GO:0005488//binding;GO:0001882//nucleoside binding;GO:0032550//purine ribonucleoside binding;GO:0097367//carbohydrate derivative binding;GO:1901363//heterocyclic compound binding;GO:0032549//ribonucleoside binding	-
Unigene000221	216	--	--	--	--	--	--	--	--	--	--	--	-	-	-
Unigene000222	347	AT2G37010.2	non-intrinsic ABC protein 12|Chr2:15541720-15546159 FORWARD LENGTH=1082	XP_010651209.1	PREDICTED: ABC transporter G family member 28 [Vitis vinifera]	sp|Q9MAG3|AB24G_ARATH	ABC transporter G family member 24 OS=Arabidopsis thaliana GN=ABCG24 PE=2 SV=2	At1g53390	KOG0061	Transporter, ABC superfamily (Breast cancer resistance protein)	--	--	-	-	-
Unigene000223	365	AT3G14000.2	DZC (Disease resistance/zinc finger/chromosome condensation-like region) domain containing protein|Chr3:4631170-4633353 REVERSE LENGTH=374	XP_015571804.1	PREDICTED: protein Brevis radix-like 4 [Ricinus communis]// XP_015571805.1 PREDICTED: protein Brevis radix-like 4 [Ricinus communis]	sp|Q8GYL9|BRXL2_ARATH	Protein Brevis radix-like 2 OS=Arabidopsis thaliana GN=BRXL2 PE=2 SV=1	--	--	--	--	--	-	-	-
Unigene000224	214	AT3G11940.2	ribosomal protein 5A|Chr3:3778175-3779354 REVERSE LENGTH=207	JAT64122.1	40S ribosomal protein S5, partial [Anthurium amnicola]	sp|P46782|RS5_HUMAN	40S ribosomal protein S5 OS=Homo sapiens GN=RPS5 PE=1 SV=4	Hs13904870	KOG3291	Ribosomal protein S7	K02989//small subunit ribosomal protein S5e	gsl:Gasu_44440	GO:0043170//macromolecule metabolic process;GO:0008152//metabolic process;GO:0071704//organic substance metabolic process;GO:0010467//gene expression	GO:0005198//structural molecule activity	GO:0005622//intracellular;GO:0044464//cell part;GO:0044444//cytoplasmic part;GO:0044424//intracellular part;GO:0043226//organelle;GO:0030529//intracellular ribonucleoprotein complex;GO:0043228//non-membrane-bounded organelle;GO:1990904//ribonucleoprotein complex;GO:0005623//cell;GO:0044446//intracellular organelle part;GO:0005737//cytoplasm;GO:0044391//ribosomal subunit;GO:0032991//macromolecular…
Unigene000225	204	--	--	--	--	--	--	--	--	--	--	--	-	-	-
Unigene000226	204	AT4G13820.1	Leucine-rich repeat (LRR) family protein|Chr4:8008535-8010694 REVERSE LENGTH=719	KVI10573.1	Leucine-rich repeat-containing protein [Cynara cardunculus var. scolymus]	--	--	At4g13900	KOG0619	FOG: Leucine rich repeat	--	--	-	-	-
Unigene000227	264	--	--	--	--	--	--	--	--	--	--	--	-	-	-
Unigene000228	511	--	--	--	--	--	--	--	--	--	--	--	-	-	-
Unigene000229	416	--	--	--	--	--	--	--	--	--	--	--	-	-	-
Unigene000230	357	--	--	--	--	--	--	--	--	--	--	--	-	-	-
Unigene000231	380	--	--	--	--	--	--	--	--	--	--	--	-	-	-
Unigene000232	271	--	--	--	--	--	--	--	--	--	--	--	-	-	-
Unigene000233	292	AT5G59970.2	Histone superfamily protein|Chr5:24146352-24146663 REVERSE LENGTH=103	EWY86807.1	histone H4 [Fusarium oxysporum FOSC 3-a]// EWZ34882.1 histone H4 [Fusarium oxysporum Fo47]// EWZ95022.1 histone H4 [Fusarium oxysporum f. sp. lycopersici MN25]// EXA38843.1 histone H4 [Fusarium oxysporum f. sp. pisi HDV247]// EXK95001.1 histone H4 [Fusarium oxysporum f. sp. raphani 54005]// EXL48599.1 histone H4 [Fusarium oxysporum f. sp. radicis-lycopersici 26381]// EXM05174.1 histone H4 [Fusari…	sp|Q8NIQ8|H42_TALFU	Histone H4.2 OS=Talaromyces funiculosus GN=H4.2 PE=3 SV=3	Hs4504301	KOG3467	Histone H4	K11254//histone H4	jcu:105628184	GO:0071824//protein-DNA complex subunit organization;GO:0009987//cellular process;GO:0019438//aromatic compound biosynthetic process;GO:0044249//cellular biosynthetic process;GO:0006139//nucleobase-containing compound metabolic process;GO:0051604//protein maturation;GO:0044237//cellular metabolic process;GO:0071840//cellular component organization or biogenesis;GO:0034641//cellular nitrogen compo…	GO:1901363//heterocyclic compound binding;GO:0005515//protein binding;GO:0097159//organic cyclic compound binding;GO:0046983//protein dimerization activity;GO:0005488//binding;GO:0003676//nucleic acid binding	GO:0043228//non-membrane-bounded organelle;GO:0016020//membrane;GO:0043227//membrane-bounded organelle;GO:0044424//intracellular part;GO:0043229//intracellular organelle;GO:0043226//organelle;GO:0005622//intracellular;GO:0044464//cell part;GO:0031224//intrinsic component of membrane;GO:0005623//cell;GO:0043232//intracellular non-membrane-bounded organelle;GO:0044425//membrane part;GO:0043231//int…
Unigene000234	640	--	--	--	--	--	--	--	--	--	--	--	-	-	-
Unigene000235	509	--	--	--	--	--	--	--	--	--	--	--	-	-	-
Unigene000236	279	--	--	--	--	--	--	--	--	--	--	--	-	-	-
Unigene000237	307	--	--	--	--	--	--	--	--	--	--	--	-	-	-
Unigene000238	674	--	--	--	--	--	--	--	--	--	--	--	-	-	-
Unigene000239	378	AT3G07650.4	CONSTANS-like 9|Chr3:2442494-2443901 FORWARD LENGTH=372	XP_019194504.1	PREDICTED: zinc finger protein CONSTANS-LIKE 9-like isoform X2 [Ipomoea nil]	sp|Q9SSE5|COL9_ARATH	Zinc finger protein CONSTANS-LIKE 9 OS=Arabidopsis thaliana GN=COL9 PE=2 SV=1	At3g02380	KOG1601	GATA-4/5/6 transcription factors	--	--	-	-	-
Unigene000240	242	--	--	--	--	--	--	--	--	--	--	--	-	-	-
Unigene000241	470	--	--	--	--	--	--	--	--	--	--	--	-	-	-
Unigene000242	405	--	--	--	--	--	--	--	--	--	--	--	-	-	-
Unigene000243	284	--	--	--	--	--	--	--	--	--	--	--	-	-	-
Unigene000244	1630	AT3G15010.2	RNA-binding (RRM/RBD/RNP motifs) family protein|Chr3:5052844-5054058 FORWARD LENGTH=404	KVH93129.1	Nucleotide-binding, alpha-beta plait [Cynara cardunculus var. scolymus]	sp|Q9LKA4|UBA2C_ARATH	UBP1-associated protein 2C OS=Arabidopsis thaliana GN=UBA2C PE=2 SV=1	At3g15010	KOG0118	FOG: RRM domain	K12741//heterogeneous nuclear ribonucleoprotein A1/A3	vvi:100248626	-	-	-
Unigene000245	637	--	--	--	--	--	--	--	--	--	--	--	-	-	-
Unigene000246	232	--	--	--	--	--	--	--	--	--	--	--	-	-	-
Unigene000247	768	--	--	--	--	--	--	--	--	--	--	--	-	-	-
Unigene000248	238	--	--	--	--	--	--	--	--	--	--	--	-	-	-
Unigene000249	309	--	--	--	--	--	--	--	--	--	--	--	-	-	-
Unigene000250	209	--	--	--	--	--	--	--	--	--	--	--	-	-	-
Unigene000251	287	--	--	--	--	--	--	--	--	--	--	--	-	-	-
Unigene000252	209	--	--	--	--	--	--	--	--	--	--	--	-	-	-
Unigene000253	219	AT5G36180.1	serine carboxypeptidase-like 1|Chr5:14239198-14241862 FORWARD LENGTH=441	XP_018832174.1	PREDICTED: serine carboxypeptidase-like 7, partial [Juglans regia]	sp|O64811|SCP9_ARATH	Serine carboxypeptidase-like 9 OS=Arabidopsis thaliana GN=SCPL9 PE=2 SV=1	At2g23010	KOG1282	Serine carboxypeptidases (lysosomal cathepsin A)	K16296//serine carboxypeptidase-like clade I [EC:3.4.16.-]	jcu:105650876	-	-	-
Unigene000254	478	--	--	--	--	--	--	--	--	--	--	--	-	-	-
Unigene000255	217	--	--	--	--	--	--	--	--	--	--	--	-	-	-
Unigene000256	904	--	--	--	--	--	--	--	--	--	--	--	-	-	-
Unigene000257	210	--	--	--	--	--	--	--	--	--	--	--	-	-	-
Unigene000258	280	--	--	--	--	--	--	--	--	--	--	--	-	-	-
Unigene000259	377	--	--	--	--	--	--	--	--	--	--	--	-	-	-
Unigene000260	624	AT1G65820.1	microsomal glutathione s-transferase|Chr1:24485213-24486682 FORWARD LENGTH=146	KVI08692.1	Membrane associated eicosanoid/glutathione metabolism-like domain-containing protein [Cynara cardunculus var. scolymus]	sp|O14880|MGST3_HUMAN	Microsomal glutathione S-transferase 3 OS=Homo sapiens GN=MGST3 PE=1 SV=1	--	--	--	K00799//glutathione S-transferase [EC:2.5.1.18]	jcu:105635645	-	GO:0016740//transferase activity;GO:0016765//transferase activity, transferring alkyl or aryl (other than methyl) groups;GO:0003824//catalytic activity	GO:0005623//cell;GO:0043229//intracellular organelle;GO:0005622//intracellular;GO:0031224//intrinsic component of membrane;GO:0044464//cell part;GO:0016020//membrane;GO:0043231//intracellular membrane-bounded organelle;GO:0044425//membrane part;GO:0043227//membrane-bounded organelle;GO:0044424//intracellular part;GO:0043226//organelle
Unigene000261	249	--	--	--	--	--	--	--	--	--	--	--	-	-	-
Unigene000262	214	--	--	--	--	--	--	--	--	--	--	--	-	-	-
Unigene000263	242	--	--	EYU45004.1	hypothetical protein MIMGU_mgv1a017783mg [Erythranthe guttata]	--	--	--	--	--	--	--	-	-	-
Unigene000264	363	--	--	--	--	--	--	--	--	--	--	--	-	-	-
Unigene000265	355	--	--	--	--	--	--	--	--	--	--	--	-	-	-
Unigene000266	222	--	--	--	--	--	--	--	--	--	--	--	-	-	-
Unigene000267	269	AT1G11000.2	Seven transmembrane MLO family protein|Chr1:3672567-3675909 REVERSE LENGTH=424	XP_015878954.1	PREDICTED: MLO-like protein 4 [Ziziphus jujuba]	sp|O23693|MLO4_ARATH	MLO-like protein 4 OS=Arabidopsis thaliana GN=MLO4 PE=2 SV=2	--	--	--	K08472//mlo protein	fve:101301108	-	-	-
Unigene000268	350	AT4G13180.1	NAD(P)-binding Rossmann-fold superfamily protein|Chr4:7657373-7658164 REVERSE LENGTH=263	KEQ82752.1	ESC reductase [Aureobasidium pullulans EXF-150]	sp|P87025|THR1_COLOR	Trihydroxynaphthalene reductase OS=Colletotrichum orbiculare (strain 104-T / ATCC 96160 / CBS 514.97 / LARS 414 / MAFF 240422) GN=THR1 PE=3 SV=4	At4g13180	KOG0725	Reductases with broad range of substrate specificities	K00059//3-oxoacyl-[acyl-carrier protein] reductase [EC:1.1.1.100]	sita:101767979	GO:0044763//single-organism cellular process;GO:0042440//pigment metabolic process;GO:0044699//single-organism process;GO:0006725//cellular aromatic compound metabolic process;GO:0009987//cellular process;GO:1901615//organic hydroxy compound metabolic process;GO:0044237//cellular metabolic process;GO:0008152//metabolic process;GO:0044710//single-organism metabolic process;GO:0071704//organic subs…	GO:0003824//catalytic activity;GO:0016614//oxidoreductase activity, acting on CH-OH group of donors;GO:0016616//oxidoreductase activity, acting on the CH-OH group of donors, NAD or NADP as acceptor;GO:0016491//oxidoreductase activity	-
Unigene000269	297	AT1G75820.1	Leucine-rich receptor-like protein kinase family protein|Chr1:28463631-28466652 REVERSE LENGTH=980	KVH87728.1	Concanavalin A-like lectin/glucanase, subgroup [Cynara cardunculus var. scolymus]	sp|Q9SYQ8|CLV1_ARATH	Receptor protein kinase CLAVATA1 OS=Arabidopsis thaliana GN=CLV1 PE=1 SV=3	At5g25910	KOG0619	FOG: Leucine rich repeat	--	--	-	-	-
Unigene000270	503	AT2G19130.1	S-locus lectin protein kinase family protein|Chr2:8293789-8296275 FORWARD LENGTH=828	KVI06709.1	Apple-like protein [Cynara cardunculus var. scolymus]	sp|O64477|Y2913_ARATH	G-type lectin S-receptor-like serine/threonine-protein kinase At2g19130 OS=Arabidopsis thaliana GN=At2g19130 PE=2 SV=1	--	--	--	--	--	GO:0009987//cellular process;GO:0008152//metabolic process;GO:0044237//cellular metabolic process;GO:0006793//phosphorus metabolic process;GO:0006796//phosphate-containing compound metabolic process	GO:0003824//catalytic activity;GO:0005488//binding;GO:0016773//phosphotransferase activity, alcohol group as acceptor;GO:0016740//transferase activity;GO:0016301//kinase activity;GO:0004672//protein kinase activity;GO:0016772//transferase activity, transferring phosphorus-containing groups	GO:0016020//membrane
Unigene000271	538	--	--	--	--	--	--	--	--	--	--	--	-	-	-
Unigene000272	406	AT4G34350.1	4-hydroxy-3-methylbut-2-enyl diphosphate reductase|Chr4:16428681-16431038 REVERSE LENGTH=466	AMB19711.1	4-hydroxy-3-methylbut-2-enyl diphosphate reductase 1, partial [Taraxacum kok-saghyz]	sp|Q94B35|ISPH_ARATH	4-hydroxy-3-methylbut-2-enyl diphosphate reductase, chloroplastic OS=Arabidopsis thaliana GN=ISPH PE=2 SV=1	--	--	--	K03527//4-hydroxy-3-methylbut-2-enyl diphosphate reductase [EC:1.17.1.2]	sot:102592556	-	-	-
Unigene000273	221	--	--	--	--	--	--	--	--	--	--	--	-	-	-
Unigene000274	243	--	--	KYP69047.1	Retrovirus-related Pol polyprotein from transposon TNT 1-94 [Cajanus cajan]	sp|P10978|POLX_TOBAC	Retrovirus-related Pol polyprotein from transposon TNT 1-94 OS=Nicotiana tabacum PE=2 SV=1	At2g13930	KOG0017	FOG: Transposon-encoded proteins with TYA, reverse transcriptase, integrase domains in various combinations	--	--	-	-	-
Unigene000275	275	AT4G21310.1	transmembrane protein%2C putative (DUF1218)|Chr4:11339134-11339787 REVERSE LENGTH=168	KVH74767.1	Protein of unknown function DUF1218 [Cynara cardunculus var. scolymus]	--	--	--	--	--	--	--	-	-	-
Unigene000276	227	--	--	--	--	--	--	--	--	--	--	--	-	-	-
Unigene000277	462	--	--	--	--	--	--	--	--	--	--	--	-	-	-
Unigene000278	351	--	--	--	--	--	--	--	--	--	--	--	-	-	-
Unigene000279	544	--	--	--	--	--	--	--	--	--	--	--	-	-	-
Unigene000280	234	--	--	--	--	--	--	--	--	--	--	--	-	-	-
Unigene000281	319	--	--	--	--	--	--	--	--	--	--	--	-	-	-
Unigene000282	279	--	--	--	--	--	--	--	--	--	--	--	-	-	-
Unigene000283	365	--	--	BAD66815.1	orf174 (mitochondrion) [Beta vulgaris subsp. vulgaris]	--	--	--	--	--	--	--	-	-	-
Unigene000284	484	AT2G27660.1	Cysteine/Histidine-rich C1 domain family protein|Chr2:11798694-11800850 REVERSE LENGTH=718	KVH88739.1	C1-like protein [Cynara cardunculus var. scolymus]	--	--	--	--	--	--	--	-	-	-
Unigene000285	1584	AT2G36970.1	UDP-Glycosyltransferase superfamily protein|Chr2:15529050-15530712 FORWARD LENGTH=490	KVI09513.1	UDP-glucuronosyl/UDP-glucosyltransferase, partial [Cynara cardunculus var. scolymus]	sp|Q9SJL0|U86A1_ARATH	UDP-glycosyltransferase 86A1 OS=Arabidopsis thaliana GN=UGT86A1 PE=2 SV=1	At2g36970	KOG1192	UDP-glucuronosyl and UDP-glucosyl transferase	--	--	-	GO:0016757//transferase activity, transferring glycosyl groups;GO:0016740//transferase activity;GO:0003824//catalytic activity	-
Unigene000286	387	--	--	--	--	--	--	--	--	--	--	--	-	-	-
Unigene000287	423	--	--	--	--	--	--	--	--	--	--	--	-	-	-
Unigene000288	201	--	--	--	--	--	--	--	--	--	--	--	-	-	-
Unigene000289	219	--	--	--	--	--	--	--	--	--	--	--	-	-	-
Unigene000290	364	--	--	--	--	--	--	--	--	--	--	--	-	-	-
Unigene000291	226	--	--	ELQ34627.1	phosphate transporter family protein [Magnaporthe oryzae Y34]// ELQ34627.1 phosphate transporter family protein [Magnaporthe oryzae Y34]	sp|P15710|PHO4_NEUCR	Phosphate-repressible phosphate permease pho-4 OS=Neurospora crassa (strain ATCC 24698 / 74-OR23-1A / CBS 708.71 / DSM 1257 / FGSC 987) GN=pho-4 PE=1 SV=1	--	--	--	--	--	GO:0051179//localization;GO:0015698//inorganic anion transport;GO:0044763//single-organism cellular process;GO:0051234//establishment of localization;GO:0006811//ion transport;GO:0044699//single-organism process;GO:0006810//transport;GO:0009987//cellular process;GO:0006820//anion transport	-	GO:0016020//membrane;GO:0044425//membrane part;GO:0031224//intrinsic component of membrane
Unigene000292	392	--	--	--	--	--	--	--	--	--	--	--	-	-	-
Unigene000293	333	--	--	--	--	--	--	--	--	--	--	--	-	-	-
Unigene000294	587	--	--	--	--	--	--	--	--	--	--	--	-	-	-
Unigene000295	352	--	--	--	--	--	--	--	--	--	--	--	-	-	-
Unigene000296	229	--	--	--	--	--	--	--	--	--	--	--	-	-	-
Unigene000297	344	AT4G21065.2	Tetratricopeptide repeat (TPR)-like superfamily protein|Chr4:11246375-11247763 FORWARD LENGTH=462	KVI12120.1	Pentatricopeptide repeat-containing protein [Cynara cardunculus var. scolymus]	sp|A8MQA3|PP330_ARATH	Pentatricopeptide repeat-containing protein At4g21065 OS=Arabidopsis thaliana GN=PCMP-H28 PE=2 SV=2	At4g21070_1	KOG4197	FOG: PPR repeat	--	--	-	-	-
Unigene000298	385	--	--	--	--	--	--	--	--	--	--	--	-	-	-
Unigene000299	368	AT1G13440.2	glyceraldehyde-3-phosphate dehydrogenase C2|Chr1:4608465-4610494 REVERSE LENGTH=310	ABD58899.1	glyceraldehyde-3-phosphate dehydrogenase, partial [Mesostigma viride]	sp|Q5RAB4|G3P_PONAB	Glyceraldehyde-3-phosphate dehydrogenase OS=Pongo abelii GN=GAPDH PE=2 SV=3	Hs7669492	KOG0657	Glyceraldehyde 3-phosphate dehydrogenase	K00134//glyceraldehyde 3-phosphate dehydrogenase [EC:1.2.1.12]	bdi:100843479	GO:0005996//monosaccharide metabolic process;GO:0008152//metabolic process;GO:0019752//carboxylic acid metabolic process;GO:0071704//organic substance metabolic process;GO:0019318//hexose metabolic process;GO:0044723//single-organism carbohydrate metabolic process;GO:0006082//organic acid metabolic process;GO:0044710//single-organism metabolic process;GO:0044237//cellular metabolic process;GO:003…	GO:0036094//small molecule binding;GO:1901265//nucleoside phosphate binding;GO:0005488//binding;GO:0016491//oxidoreductase activity;GO:0000166//nucleotide binding;GO:0003824//catalytic activity;GO:0097159//organic cyclic compound binding;GO:0016903//oxidoreductase activity, acting on the aldehyde or oxo group of donors;GO:1901363//heterocyclic compound binding	-
Unigene000300	212	--	--	--	--	--	--	--	--	--	--	--	-	-	-
Unigene000301	551	AT4G22463.1	transmembrane protein|Chr4:11838997-11839571 FORWARD LENGTH=179	XP_016716259.1	PREDICTED: 14 kDa proline-rich protein DC2.15-like [Gossypium hirsutum]	sp|P14009|14KD_DAUCA	14 kDa proline-rich protein DC2.15 OS=Daucus carota PE=2 SV=1	--	--	--	--	--	-	-	-
Unigene000302	208	--	--	--	--	--	--	--	--	--	--	--	-	-	-
Unigene000303	339	--	--	--	--	--	--	--	--	--	--	--	-	-	-
Unigene000304	422	AT2G33420.1	hypothetical protein (DUF810)|Chr2:14158782-14162304 FORWARD LENGTH=1039	KVH91035.1	Mammalian uncoordinated homology 13, domain 2 [Cynara cardunculus var. scolymus]	--	--	--	--	--	--	--	-	-	-
Unigene000305	290	--	--	--	--	--	--	--	--	--	--	--	-	-	-
Unigene000306	481	--	--	--	--	--	--	--	--	--	--	--	-	-	-
Unigene000307	1375	AT1G22340.1	UDP-glucosyl transferase 85A7|Chr1:7890464-7892090 REVERSE LENGTH=487	KVI07929.1	UDP-glucuronosyl/UDP-glucosyltransferase [Cynara cardunculus var. scolymus]	sp|F8WKW1|UGT2_GARJA	7-deoxyloganetin glucosyltransferase OS=Gardenia jasminoides GN=UGT85A24 PE=1 SV=1	At1g22340	KOG1192	UDP-glucuronosyl and UDP-glucosyl transferase	--	--	-	GO:0016740//transferase activity;GO:0016757//transferase activity, transferring glycosyl groups;GO:0003824//catalytic activity	-
Unigene000308	1076	AT2G36460.1	Aldolase superfamily protein|Chr2:15296929-15298387 REVERSE LENGTH=358	KVH99921.1	Aldolase-type TIM barrel, partial [Cynara cardunculus var. scolymus]	sp|P29356|ALF_SPIOL	Fructose-bisphosphate aldolase, cytoplasmic isozyme OS=Spinacia oleracea PE=2 SV=1	At2g36460	KOG1557	Fructose-biphosphate aldolase	K01623//fructose-bisphosphate aldolase, class I [EC:4.1.2.13]	pxb:103944294	-	-	-
Unigene000309	323	--	--	--	--	--	--	--	--	--	--	--	-	-	-
Unigene000310	277	--	--	--	--	--	--	--	--	--	--	--	-	-	-
Unigene000311	770	--	--	--	--	--	--	--	--	--	--	--	-	-	-
Unigene000312	731	--	--	--	--	--	--	--	--	--	--	--	-	-	-
Unigene000313	213	--	--	--	--	--	--	--	--	--	--	--	-	-	-
Unigene000314	375	AT3G62890.1	Pentatricopeptide repeat (PPR) superfamily protein|Chr3:23246168-23247973 FORWARD LENGTH=573	KVI06305.1	Pentatricopeptide repeat-containing protein [Cynara cardunculus var. scolymus]	sp|Q683I9|PP295_ARATH	Pentatricopeptide repeat-containing protein At3g62890 OS=Arabidopsis thaliana GN=PCMP-H82 PE=2 SV=1	At3g08820	KOG4197	FOG: PPR repeat	--	--	-	-	-
Unigene000315	331	AT3G53760.1	GAMMA-TUBULIN COMPLEX PROTEIN 4|Chr3:19918182-19922264 REVERSE LENGTH=745	JAU57850.1	Gamma-tubulin complex component 4 [Noccaea caerulescens]	sp|Q9M350|GACP4_ARATH	Gamma-tubulin complex component 4 OS=Arabidopsis thaliana GN=GCP4 PE=2 SV=2	At3g53760	KOG2065	Gamma-tubulin ring complex protein	K16571//gamma-tubulin complex component 4	bvg:104898941	GO:0007017//microtubule-based process;GO:0016043//cellular component organization;GO:1902589//single-organism organelle organization;GO:0044763//single-organism cellular process;GO:0006996//organelle organization;GO:0044699//single-organism process;GO:0000226//microtubule cytoskeleton organization;GO:0007010//cytoskeleton organization;GO:0071840//cellular component organization or biogenesis;GO:0…	GO:0005515//protein binding;GO:0015631//tubulin binding;GO:0008092//cytoskeletal protein binding;GO:0005488//binding	GO:0044424//intracellular part;GO:0044446//intracellular organelle part;GO:0044430//cytoskeletal part;GO:0044422//organelle part;GO:0005622//intracellular;GO:0043229//intracellular organelle;GO:0015630//microtubule cytoskeleton;GO:0005819//spindle;GO:0043228//non-membrane-bounded organelle;GO:0005623//cell;GO:0043232//intracellular non-membrane-bounded organelle;GO:0044464//cell part;GO:0043226//…
Unigene000316	544	--	--	--	--	sp|P05411|JUN_AVIS1	Viral jun-transforming protein OS=Avian sarcoma virus (strain 17) GN=JUN PE=1 SV=2	Hs4758616	KOG0837	Transcriptional activator of the JUN family	--	--	-	-	-
Unigene000317	454	--	--	EQB53948.1	bZIP transcription factor [Colletotrichum gloeosporioides Cg-14]	sp|P18289|JRA_DROME	Transcription factor AP-1 OS=Drosophila melanogaster GN=Jra PE=1 SV=2	7303798	KOG0837	Transcriptional activator of the JUN family	--	--	GO:0051171//regulation of nitrogen compound metabolic process;GO:0008152//metabolic process;GO:0010468//regulation of gene expression;GO:0051252//regulation of RNA metabolic process;GO:0050794//regulation of cellular process;GO:0050896//response to stimulus;GO:0006355//regulation of transcription, DNA-templated;GO:0044763//single-organism cellular process;GO:0044710//single-organism metabolic pro…	GO:0003676//nucleic acid binding;GO:0003677//DNA binding;GO:1901363//heterocyclic compound binding;GO:0097159//organic cyclic compound binding;GO:0005488//binding	-
Unigene000318	327	--	--	--	--	--	--	--	--	--	--	--	-	-	-
Unigene000319	303	--	--	--	--	--	--	--	--	--	--	--	-	-	-
Unigene000320	226	AT3G16730.1	condensin-2 complex subunit H2-like protein|Chr3:5695633-5698863 REVERSE LENGTH=683	KVH95130.1	Non-SMC condensin II complex, subunit H2-like protein, partial [Cynara cardunculus var. scolymus]	sp|Q9LUR0|CNDH2_ARATH	Condensin-2 complex subunit H2 OS=Arabidopsis thaliana GN=CAPH2 PE=2 SV=1	At3g16730	KOG2359	Uncharacterized conserved protein	K11490//condensin-2 complex subunit H2	egu:105051445	-	-	-
Unigene000321	1033	--	--	--	--	--	--	--	--	--	--	--	-	-	-
Unigene000322	296	--	--	--	--	--	--	--	--	--	--	--	-	-	-
Unigene000323	516	--	--	--	--	--	--	--	--	--	--	--	-	-	-
Unigene000324	1798	--	--	--	--	--	--	--	--	--	--	--	-	-	-
Unigene000325	429	AT3G06250.3	FAR1-related sequence 7|Chr3:1889771-1892065 REVERSE LENGTH=764	KVI06843.1	FAR1 DNA binding domain-containing protein [Cynara cardunculus var. scolymus]	sp|Q9M8J3|FRS7_ARATH	Protein FAR1-RELATED SEQUENCE 7 OS=Arabidopsis thaliana GN=FRS7 PE=2 SV=1	--	--	--	--	--	-	-	-
Unigene000326	281	--	--	--	--	--	--	--	--	--	--	--	-	-	-
Unigene000327	220	AT2G44940.1	Integrase-type DNA-binding superfamily protein|Chr2:18537294-18538181 FORWARD LENGTH=295	XP_019244119.1	PREDICTED: ethylene-responsive transcription factor ERF039 [Nicotiana attenuata]// OIT07744.1 ethylene-responsive transcription factor erf034 [Nicotiana attenuata]	sp|Q8LBQ7|ERF34_ARATH	Ethylene-responsive transcription factor ERF034 OS=Arabidopsis thaliana GN=ERF034 PE=2 SV=2	--	--	--	--	--	-	-	-
Unigene000328	754	--	--	--	--	--	--	--	--	--	--	--	-	-	-
Unigene000329	930	--	--	--	--	--	--	--	--	--	--	--	-	-	-
Unigene000330	1006	--	--	--	--	--	--	--	--	--	--	--	-	-	-
Unigene000331	415	--	--	--	--	--	--	--	--	--	--	--	-	-	-
Unigene000332	548	--	--	--	--	--	--	--	--	--	--	--	-	-	-
Unigene000333	1051	AT1G66960.2	Terpenoid cyclases family protein|Chr1:24985155-24991659 REVERSE LENGTH=772	KVH95176.1	Squalene cyclase [Cynara cardunculus var. scolymus]	sp|F8WQD0|SHS1_ASTTA	Shionone synthase OS=Aster tataricus GN=SHS1 PE=1 SV=1	At1g66960	KOG0497	Oxidosqualene-lanosterol cyclase and related proteins	K15813//beta-amyrin synthase [EC:5.4.99.39]	egr:104450716	-	-	-
Unigene000334	320	--	--	KYP39598.1	Retrovirus-related Pol polyprotein from transposon TNT 1-94 [Cajanus cajan]	sp|P10978|POLX_TOBAC	Retrovirus-related Pol polyprotein from transposon TNT 1-94 OS=Nicotiana tabacum PE=2 SV=1	--	--	--	--	--	-	-	-
Unigene000335	540	AT1G48120.1	serine/threonine-protein phosphatase 7 long form-like protein|Chr1:17774238-17779624 REVERSE LENGTH=1340	XP_012848926.1	PREDICTED: serine/threonine-protein phosphatase 7 long form homolog isoform X2 [Erythranthe guttata]	sp|Q9LNG5|PPP7L_ARATH	Serine/threonine-protein phosphatase 7 long form homolog OS=Arabidopsis thaliana GN=At1g48120 PE=2 SV=1	--	--	--	--	--	-	-	-
Unigene000336	311	AT3G09630.2	Ribosomal protein L4/L1 family|Chr3:2953813-2955444 FORWARD LENGTH=405	EXM08007.1	50S ribosomal protein L4e [Fusarium oxysporum f. sp. cubense tropical race 4 54006]	sp|P35679|RL4A_SCHPO	60S ribosomal protein L4-A OS=Schizosaccharomyces pombe (strain 972 / ATCC 24843) GN=rpl402 PE=1 SV=2	SPBP8B7.03c	KOG1475	Ribosomal protein RPL1/RPL2/RL4L4	K02930//large subunit ribosomal protein L4e	ccp:CHC_T00008365001	GO:0048856//anatomical structure development;GO:0044767//single-organism developmental process;GO:0007275//multicellular organism development;GO:0032502//developmental process;GO:0044707//single-multicellular organism process;GO:0043170//macromolecule metabolic process;GO:0032501//multicellular organismal process;GO:0044699//single-organism process;GO:0008152//metabolic process;GO:0010467//gene e…	-	GO:0044424//intracellular part;GO:0030529//intracellular ribonucleoprotein complex;GO:1990904//ribonucleoprotein complex;GO:0005622//intracellular;GO:0005623//cell;GO:0044464//cell part;GO:0032991//macromolecular complex
Unigene000337	214	--	--	--	--	--	--	--	--	--	--	--	-	-	-
Unigene000338	736	AT4G23160.3	cysteine-rich RECEPTOR-like kinase|Chr4:12129485-12133157 FORWARD LENGTH=1043	XP_017180413.1	PREDICTED: uncharacterized mitochondrial protein AtMg00810-like [Malus domestica]	sp|P92519|M810_ARATH	Uncharacterized mitochondrial protein AtMg00810 OS=Arabidopsis thaliana GN=AtMg00810 PE=4 SV=1	At4g10990_1	KOG0017	FOG: Transposon-encoded proteins with TYA, reverse transcriptase, integrase domains in various combinations	--	--	-	-	-
Unigene000339	470	--	--	--	--	--	--	--	--	--	--	--	-	-	-
Unigene000340	529	--	--	--	--	--	--	--	--	--	--	--	-	-	-
Unigene000341	417	--	--	--	--	--	--	--	--	--	--	--	-	-	-
Unigene000342	1085	AT1G28220.1	purine permease 3|Chr1:9860303-9861434 REVERSE LENGTH=351	XP_012067939.1	PREDICTED: purine permease 3-like [Jatropha curcas]	sp|Q9FZ95|PUP3_ARATH	Purine permease 3 OS=Arabidopsis thaliana GN=PUP3 PE=2 SV=1	--	--	--	--	--	-	-	-
Unigene000343	1235	AT1G28220.1	purine permease 3|Chr1:9860303-9861434 REVERSE LENGTH=351	XP_012067939.1	PREDICTED: purine permease 3-like [Jatropha curcas]	sp|Q9FZ95|PUP3_ARATH	Purine permease 3 OS=Arabidopsis thaliana GN=PUP3 PE=2 SV=1	--	--	--	--	--	-	-	-
Unigene000344	1710	AT1G15690.1	Inorganic H pyrophosphatase family protein|Chr1:5399115-5402185 FORWARD LENGTH=770	KVI06057.1	Pyrophosphate-energised proton pump [Cynara cardunculus var. scolymus]	sp|P21616|AVP_VIGRR	Pyrophosphate-energized vacuolar membrane proton pump OS=Vigna radiata var. radiata PE=1 SV=4	--	--	--	K01507//inorganic pyrophosphatase [EC:3.6.1.1]	gmx:100794166	GO:0044765//single-organism transport;GO:0044763//single-organism cellular process;GO:0051234//establishment of localization;GO:0009987//cellular process;GO:0006810//transport;GO:1902578//single-organism localization;GO:0044699//single-organism process;GO:0051179//localization;GO:0006818//hydrogen transport	GO:0022857//transmembrane transporter activity;GO:0022804//active transmembrane transporter activity;GO:0015405//P-P-bond-hydrolysis-driven transmembrane transporter activity;GO:0005215//transporter activity;GO:0015399//primary active transmembrane transporter activity	GO:0031224//intrinsic component of membrane;GO:0016020//membrane;GO:0044425//membrane part
Unigene000345	278	--	--	--	--	--	--	--	--	--	--	--	-	-	-
Unigene000346	344	--	--	--	--	--	--	--	--	--	--	--	-	-	-
Unigene000347	397	--	--	--	--	--	--	--	--	--	--	--	-	-	-
Unigene000348	604	--	--	--	--	--	--	--	--	--	--	--	-	-	-
Unigene000349	597	--	--	--	--	--	--	--	--	--	--	--	-	-	-
Unigene000350	261	AT2G25470.3	receptor like protein 21|Chr2:10838366-10841881 FORWARD LENGTH=978	KVI10574.1	Leucine-rich repeat-containing protein [Cynara cardunculus var. scolymus]	--	--	At2g25470	KOG0619	FOG: Leucine rich repeat	--	--	-	-	-
Unigene000351	256	--	--	--	--	--	--	--	--	--	--	--	-	-	-
Unigene000352	463	--	--	--	--	--	--	--	--	--	--	--	-	-	-
Unigene000353	271	--	--	EJT44966.1	TEF4-like protein [Saccharomyces kudriavzevii IFO 1802]	sp|P36008|EF1G2_YEAST	Elongation factor 1-gamma 2 OS=Saccharomyces cerevisiae (strain ATCC 204508 / S288c) GN=TEF4 PE=1 SV=1	--	--	--	--	--	GO:0043170//macromolecule metabolic process;GO:1901566//organonitrogen compound biosynthetic process;GO:0043604//amide biosynthetic process;GO:0010467//gene expression;GO:0009058//biosynthetic process;GO:0034641//cellular nitrogen compound metabolic process;GO:0044260//cellular macromolecule metabolic process;GO:0044267//cellular protein metabolic process;GO:0009059//macromolecule biosynthetic pr…	GO:0098772//molecular function regulator	GO:0030529//intracellular ribonucleoprotein complex;GO:0035770//ribonucleoprotein granule;GO:0043229//intracellular organelle;GO:0005623//cell;GO:0044464//cell part;GO:0044424//intracellular part;GO:0043226//organelle;GO:1990904//ribonucleoprotein complex;GO:0032991//macromolecular complex;GO:0043232//intracellular non-membrane-bounded organelle;GO:0036464//cytoplasmic ribonucleoprotein granule;G…
Unigene000354	484	--	--	--	--	--	--	--	--	--	--	--	-	-	-
Unigene000355	224	--	--	--	--	--	--	--	--	--	--	--	-	-	-
Unigene000356	342	--	--	KVI09532.1	cytochrome P450 [Cynara cardunculus var. scolymus]	--	--	--	--	--	--	--	-	-	-
Unigene000357	282	--	--	--	--	--	--	--	--	--	--	--	-	-	-
Unigene000358	380	--	--	KVH87673.1	Ankyrin repeat-containing protein [Cynara cardunculus var. scolymus]	--	--	--	--	--	--	--	-	-	-
Unigene000359	601	AT1G10090.1	Early-responsive to dehydration stress protein (ERD4)|Chr1:3290572-3295271 REVERSE LENGTH=762	XP_010247469.1	PREDICTED: CSC1-like protein RXW8 isoform X3 [Nelumbo nucifera]	sp|Q94A87|CSCL9_ARATH	CSC1-like protein At1g10090 OS=Arabidopsis thaliana GN=At1g10090 PE=1 SV=1	At1g10080	KOG1134	Uncharacterized conserved protein	--	--	-	-	-
Unigene000360	333	--	--	--	--	--	--	--	--	--	--	--	-	-	-
Unigene000361	323	--	--	--	--	--	--	--	--	--	--	--	-	-	-
Unigene000362	463	--	--	--	--	--	--	--	--	--	--	--	-	-	-
Unigene000363	208	AT1G23070.1	organic solute transporter ostalpha protein (DUF300)|Chr1:8174011-8175758 REVERSE LENGTH=403	KVI12237.1	Organic solute transporter Ost-alpha [Cynara cardunculus var. scolymus]	sp|Q5BPZ5|LAZH2_ARATH	Protein LAZ1 homolog 2 OS=Arabidopsis thaliana GN=At1g23070 PE=2 SV=1	At1g23070	KOG2641	Predicted seven transmembrane receptor - rhodopsin family	--	--	-	-	-
Unigene000364	478	--	--	--	--	--	--	--	--	--	--	--	-	-	-
Unigene000365	579	--	--	--	--	--	--	--	--	--	--	--	-	-	-
Unigene000366	808	--	--	--	--	--	--	--	--	--	--	--	-	-	-
Unigene000367	744	--	--	--	--	--	--	--	--	--	--	--	-	-	-
Unigene000368	411	--	--	--	--	--	--	--	--	--	--	--	-	-	-
Unigene000369	346	--	--	--	--	--	--	--	--	--	--	--	-	-	-
Unigene000370	256	--	--	--	--	--	--	--	--	--	--	--	-	-	-
Unigene000371	201	--	--	--	--	--	--	--	--	--	--	--	-	-	-
Unigene000372	367	AT3G50420.2	Pentatricopeptide repeat (PPR) superfamily protein|Chr3:18710871-18713649 REVERSE LENGTH=769	KVI07421.1	Pentatricopeptide repeat-containing protein [Cynara cardunculus var. scolymus]	sp|Q9ZUW3|PP172_ARATH	Pentatricopeptide repeat-containing protein At2g27610 OS=Arabidopsis thaliana GN=PCMP-H60 PE=2 SV=1	At2g27610	KOG4197	FOG: PPR repeat	--	--	-	-	-
Unigene000373	223	AT2G17480.1	Seven transmembrane MLO family protein|Chr2:7590559-7593768 REVERSE LENGTH=593	AJF20750.1	MLO10 [Chrysanthemum x morifolium]	sp|O22757|MLO8_ARATH	MLO-like protein 8 OS=Arabidopsis thaliana GN=MLO8 PE=1 SV=2	--	--	--	K08472//mlo protein	pxb:103950182	-	-	-
Unigene000374	676	ATMG00300.1	Gag-Pol-related retrotransposon family protein|ChrM:89617-90054 REVERSE LENGTH=145	KZV32174.1	retrovirus-related Pol polyprotein from transposon TNT 1-94 [Dorcoceras hygrometricum]	sp|P10978|POLX_TOBAC	Retrovirus-related Pol polyprotein from transposon TNT 1-94 OS=Nicotiana tabacum PE=2 SV=1	At3g29775	KOG0017	FOG: Transposon-encoded proteins with TYA, reverse transcriptase, integrase domains in various combinations	--	--	-	-	-
Unigene000375	878	--	--	--	--	--	--	--	--	--	--	--	-	-	-
Unigene000376	438	--	--	XP_002320456.2	hypothetical protein POPTR_0014s14950g, partial [Populus trichocarpa]// EEE98771.2 hypothetical protein POPTR_0014s14950g, partial [Populus trichocarpa]	sp|P27502|POL_RTBVP	Polyprotein P3 OS=Rice tungro bacilliform virus (isolate Philippines) PE=1 SV=1	--	--	--	--	--	-	-	-
Unigene000377	449	--	--	--	--	--	--	--	--	--	--	--	-	-	-
Unigene000378	289	AT2G23380.1	SET domain-containing protein|Chr2:9955570-9960117 FORWARD LENGTH=902	XP_016570204.1	PREDICTED: histone-lysine N-methyltransferase CLF [Capsicum annuum]	sp|P93831|CLF_ARATH	Histone-lysine N-methyltransferase CLF OS=Arabidopsis thaliana GN=CLF PE=1 SV=2	At2g23380	KOG1079	Transcriptional repressor EZH1	K11430//histone-lysine N-methyltransferase EZH2 [EC:2.1.1.43]	egr:104457119	-	-	-
Unigene000379	846	AT1G10220.2	ZCF37|Chr1:3352159-3352815 FORWARD LENGTH=218	CDY27281.1	BnaC04g18610D [Brassica napus]	--	--	--	--	--	--	--	-	-	-
Unigene000380	611	AT1G05170.2	Galactosyltransferase family protein|Chr1:1491460-1493931 REVERSE LENGTH=407	XP_014493644.1	PREDICTED: probable beta-1,3-galactosyltransferase 8 [Vigna radiata var. radiata]	sp|A8MRC7|B3GT2_ARATH	Probable beta-1,3-galactosyltransferase 2 OS=Arabidopsis thaliana GN=B3GALT2 PE=2 SV=1	At1g05170	KOG2288	Galactosyltransferases	--	--	-	GO:0016740//transferase activity;GO:0003824//catalytic activity	-
Unigene000381	460	--	--	--	--	--	--	--	--	--	--	--	-	-	-
Unigene000382	328	AT4G32700.2	MUS308 and mammalian DNA polymerase-like protein|Chr4:15767440-15779185 FORWARD LENGTH=2154	KVH89957.1	DNA-directed DNA polymerase, family A, palm domain-containing protein [Cynara cardunculus var. scolymus]	sp|Q588V7|TEB_ARATH	Helicase and polymerase-containing protein TEBICHI OS=Arabidopsis thaliana GN=TEB PE=2 SV=1	At4g32700	KOG0950	DNA polymerase theta/eta, DEAD-box superfamily	K02349//DNA polymerase theta [EC:2.7.7.7]	sly:101260073	-	-	-
Unigene000383	240	AT4G32700.2	MUS308 and mammalian DNA polymerase-like protein|Chr4:15767440-15779185 FORWARD LENGTH=2154	KVH89957.1	DNA-directed DNA polymerase, family A, palm domain-containing protein [Cynara cardunculus var. scolymus]	sp|Q588V7|TEB_ARATH	Helicase and polymerase-containing protein TEBICHI OS=Arabidopsis thaliana GN=TEB PE=2 SV=1	At4g32700	KOG0950	DNA polymerase theta/eta, DEAD-box superfamily	K02349//DNA polymerase theta [EC:2.7.7.7]	bvg:104884718	-	-	-
Unigene000384	460	--	--	--	--	--	--	--	--	--	--	--	-	-	-
Unigene000385	614	--	--	--	--	--	--	--	--	--	--	--	-	-	-
Unigene000386	463	AT5G06620.1	SET domain protein 38|Chr5:2033780-2036143 FORWARD LENGTH=325	XP_008241157.1	PREDICTED: histone-lysine N-methyltransferase ATXR4 [Prunus mume]	sp|Q9FG08|ATXR4_ARATH	Histone-lysine N-methyltransferase ATXR4 OS=Arabidopsis thaliana GN=ATXR4 PE=2 SV=2	At5g06620	KOG2084	Predicted histone tail methylase containing SET domain	K11426//SET and MYND domain-containing protein	pmum:103339609	-	-	-
Unigene000387	255	--	--	--	--	--	--	--	--	--	--	--	-	-	-
Unigene000388	260	--	--	KVI00574.1	AAA+ ATPase domain-containing protein [Cynara cardunculus var. scolymus]	--	--	--	--	--	--	--	-	-	-
Unigene000389	218	--	--	--	--	--	--	--	--	--	--	--	-	-	-
Unigene000390	538	--	--	--	--	--	--	--	--	--	--	--	-	-	-
Unigene000391	402	--	--	--	--	--	--	--	--	--	--	--	-	-	-
Unigene000392	273	--	--	--	--	--	--	--	--	--	--	--	-	-	-
Unigene000393	286	--	--	--	--	--	--	--	--	--	--	--	-	-	-
Unigene000394	980	--	--	--	--	--	--	--	--	--	--	--	-	-	-
Unigene000395	209	--	--	KEQ80323.1	monooxygenase flavin-binding family protein-like protein [Aureobasidium pullulans EXF-150]	sp|A5H9N6|ALMA_ACISP	Probable FAD-binding monooxygenase AlmA OS=Acinetobacter sp. GN=almA PE=3 SV=1	--	--	--	--	--	-	-	-
Unigene000396	243	AT5G25310.1	Exostosin family protein|Chr5:8784820-8787235 FORWARD LENGTH=480	KVG77635.1	Exostosin-like protein, partial [Cynara cardunculus var. scolymus]	sp|Q3E7Q9|GLYT6_ARATH	Probable glycosyltransferase At5g25310 OS=Arabidopsis thaliana GN=At5g25310 PE=3 SV=2	At5g25310	KOG1021	Acetylglucosaminyltransferase EXT1/exostosin 1	--	--	-	-	GO:0016020//membrane;GO:0044425//membrane part;GO:0031224//intrinsic component of membrane
Unigene000397	411	--	--	--	--	--	--	--	--	--	--	--	-	-	-
Unigene000398	943	--	--	--	--	--	--	--	--	--	--	--	-	-	-
Unigene000399	219	--	--	--	--	--	--	--	--	--	--	--	-	-	-
Unigene000400	210	--	--	XP_017246075.1	PREDICTED: uncharacterized protein LOC108217701 [Daucus carota subsp. sativus]	--	--	7291506	KOG4400	E3 ubiquitin ligase interacting with arginine methyltransferase	--	--	-	-	-
Unigene000401	258	--	--	--	--	--	--	--	--	--	--	--	-	-	-
Unigene000402	211	--	--	--	--	--	--	--	--	--	--	--	-	-	-
Unigene000403	1368	--	--	--	--	--	--	--	--	--	--	--	-	-	-
Unigene000404	515	--	--	--	--	--	--	--	--	--	--	--	-	-	-
Unigene000405	210	--	--	--	--	--	--	--	--	--	--	--	-	-	-
Unigene000406	328	AT1G44110.1	Cyclin A1%3B1|Chr1:16775035-16777182 REVERSE LENGTH=460	KHN35496.1	Cyclin-A1-1 [Glycine soja]	sp|Q0INT0|CCA13_ORYSJ	Cyclin-A1-3 OS=Oryza sativa subsp. japonica GN=CYCA1-3 PE=2 SV=2	At1g44110	KOG0654	G2/Mitotic-specific cyclin A	K06627//cyclin A	vvi:100250590	-	-	-
Unigene000407	288	--	--	KVH98572.1	CRAL-TRIO domain-containing protein [Cynara cardunculus var. scolymus]	--	--	--	--	--	--	--	-	-	-
Unigene000408	245	--	--	--	--	--	--	--	--	--	--	--	-	-	-
Unigene000409	303	--	--	--	--	--	--	--	--	--	--	--	-	-	-
Unigene000410	1065	AT4G23160.3	cysteine-rich RECEPTOR-like kinase|Chr4:12129485-12133157 FORWARD LENGTH=1043	XP_013594528.1	PREDICTED: uncharacterized mitochondrial protein AtMg00810-like [Brassica oleracea var. oleracea]	sp|P10978|POLX_TOBAC	Retrovirus-related Pol polyprotein from transposon TNT 1-94 OS=Nicotiana tabacum PE=2 SV=1	At3g25450	KOG0017	FOG: Transposon-encoded proteins with TYA, reverse transcriptase, integrase domains in various combinations	--	--	-	-	-
Unigene000411	322	--	--	--	--	--	--	--	--	--	--	--	-	-	-
Unigene000412	731	AT1G58170.1	Disease resistance-responsive (dirigent-like protein) family protein|Chr1:21536188-21536745 FORWARD LENGTH=185	KVI08737.1	Plant disease resistance response protein [Cynara cardunculus var. scolymus]	sp|Q9C523|DIR19_ARATH	Dirigent protein 19 OS=Arabidopsis thaliana GN=DIR19 PE=2 SV=1	--	--	--	--	--	-	-	-
Unigene000413	413	--	--	--	--	--	--	--	--	--	--	--	-	-	-
Unigene000414	242	--	--	--	--	--	--	--	--	--	--	--	-	-	-
Unigene000415	207	--	--	--	--	--	--	--	--	--	--	--	-	-	-
Unigene000416	380	--	--	--	--	--	--	--	--	--	--	--	-	-	-
Unigene000417	247	--	--	--	--	--	--	--	--	--	--	--	-	-	-
Unigene000418	248	--	--	--	--	--	--	--	--	--	--	--	-	-	-
Unigene000419	238	--	--	--	--	--	--	--	--	--	--	--	-	-	-
Unigene000420	213	--	--	--	--	--	--	--	--	--	--	--	-	-	-
Unigene000421	215	--	--	--	--	--	--	--	--	--	--	--	-	-	-
Unigene000422	542	AT3G13275.1	transmembrane protein|Chr3:4289425-4289634 REVERSE LENGTH=69	CDY42381.1	BnaA08g00330D [Brassica napus]	--	--	--	--	--	--	--	-	-	-
Unigene000423	218	--	--	--	--	--	--	--	--	--	--	--	-	-	-
Unigene000424	632	--	--	--	--	--	--	--	--	--	--	--	-	-	-
Unigene000425	225	--	--	--	--	--	--	--	--	--	--	--	-	-	-
Unigene000426	225	AT1G73880.1	UDP-glucosyl transferase 89B1|Chr1:27785143-27786564 FORWARD LENGTH=473	XP_012857277.1	PREDICTED: zeatin O-xylosyltransferase-like [Erythranthe guttata]	sp|P56725|ZOX_PHAVU	Zeatin O-xylosyltransferase OS=Phaseolus vulgaris GN=ZOX1 PE=2 SV=1	At1g73880	KOG1192	UDP-glucuronosyl and UDP-glucosyl transferase	K13495//cis-zeatin O-glucosyltransferase [EC:2.4.1.215]	pmum:103342414	-	-	-
Unigene000427	472	--	--	--	--	--	--	--	--	--	--	--	-	-	-
Unigene000428	295	--	--	--	--	--	--	--	--	--	--	--	-	-	-
Unigene000429	419	AT4G34131.1	UDP-glucosyl transferase 73B3|Chr4:16343268-16344713 REVERSE LENGTH=481	BAU24818.1	Lactuca sativa O-glucosyl transferase 1 [Lactuca sativa]	sp|Q8W3P8|AOG_PHAAN	Abscisate beta-glucosyltransferase OS=Phaseolus angularis GN=AOG PE=1 SV=1	At2g15490	KOG1192	UDP-glucuronosyl and UDP-glucosyl transferase	--	--	-	-	-
Unigene000430	472	--	--	--	--	--	--	--	--	--	--	--	-	-	-
Unigene000431	250	--	--	--	--	--	--	--	--	--	--	--	-	-	-
Unigene000432	255	--	--	--	--	--	--	--	--	--	--	--	-	-	-
Unigene000433	272	--	--	--	--	--	--	--	--	--	--	--	-	-	-
Unigene000434	220	--	--	BAJ33519.1	CACTA transposable element [Dahlia pinnata]	--	--	--	--	--	--	--	-	-	-
Unigene000435	231	--	--	--	--	--	--	--	--	--	--	--	-	-	-
Unigene000436	294	--	--	--	--	--	--	--	--	--	--	--	-	-	-
Unigene000437	530	--	--	--	--	--	--	--	--	--	--	--	-	-	-
Unigene000438	415	--	--	--	--	--	--	--	--	--	--	--	-	-	-
Unigene000439	521	--	--	--	--	--	--	--	--	--	--	--	-	-	-
Unigene000440	577	--	--	KVH80536.1	Ribosomal protein L2 domain 2, partial [Cynara cardunculus var. scolymus]	--	--	--	--	--	--	--	-	-	-
Unigene000441	884	AT5G67510.1	Translation protein SH3-like family protein|Chr5:26937970-26938410 REVERSE LENGTH=146	XP_001833113.1	60S ribosomal protein L26 [Coprinopsis cinerea okayama7#130]// EAU88802.1 ribosomal protein L24 [Coprinopsis cinerea okayama7#130]	sp|P61255|RL26_MOUSE	60S ribosomal protein L26 OS=Mus musculus GN=Rpl26 PE=1 SV=1	Hs4506621	KOG3401	60S ribosomal protein L26	K02898//large subunit ribosomal protein L26e	bpg:Bathy07g03810	GO:0071704//organic substance metabolic process;GO:0043170//macromolecule metabolic process;GO:0008152//metabolic process;GO:0010467//gene expression	-	GO:0044422//organelle part;GO:0005623//cell;GO:0030529//intracellular ribonucleoprotein complex;GO:0043228//non-membrane-bounded organelle;GO:0043226//organelle;GO:0044464//cell part;GO:0005840//ribosome;GO:0043229//intracellular organelle;GO:0044424//intracellular part;GO:0005737//cytoplasm;GO:0043232//intracellular non-membrane-bounded organelle;GO:0005622//intracellular;GO:1990904//ribonucleop…
Unigene000442	560	--	--	--	--	--	--	--	--	--	--	--	-	-	-
Unigene000443	296	--	--	XP_019075331.1	PREDICTED: uncharacterized protein LOC104879452 [Vitis vinifera]// CAN69476.1 hypothetical protein VITISV_017346 [Vitis vinifera]// CBI36648.3 unnamed protein product, partial [Vitis vinifera]	--	--	--	--	--	--	--	-	-	-
Unigene000444	214	--	--	--	--	--	--	--	--	--	--	--	-	-	-
Unigene000445	1188	AT1G59960.1	NAD(P)-linked oxidoreductase superfamily protein|Chr1:22071410-22073067 REVERSE LENGTH=326	KVG79775.1	Aldo/keto reductase [Cynara cardunculus var. scolymus]	sp|O49133|GALUR_FRAAN	D-galacturonate reductase OS=Fragaria ananassa GN=GALUR PE=1 SV=1	At1g59960	KOG1577	Aldo/keto reductase family proteins	K00011//aldehyde reductase [EC:1.1.1.21]	vvi:100254148	GO:0008152//metabolic process;GO:0044710//single-organism metabolic process;GO:0044699//single-organism process	-	-
Unigene000446	1097	AT1G59960.1	NAD(P)-linked oxidoreductase superfamily protein|Chr1:22071410-22073067 REVERSE LENGTH=326	KVG79775.1	Aldo/keto reductase [Cynara cardunculus var. scolymus]	sp|O49133|GALUR_FRAAN	D-galacturonate reductase OS=Fragaria ananassa GN=GALUR PE=1 SV=1	At1g59960	KOG1577	Aldo/keto reductase family proteins	K00011//aldehyde reductase [EC:1.1.1.21]	vvi:100254148	GO:0044710//single-organism metabolic process;GO:0044699//single-organism process;GO:0008152//metabolic process	-	-
Unigene000447	453	--	--	--	--	--	--	--	--	--	--	--	-	-	-
Unigene000448	413	--	--	--	--	--	--	--	--	--	--	--	-	-	-
Unigene000449	226	--	--	XP_009589293.1	PREDICTED: transcription repressor OFP17-like [Nicotiana tomentosiformis]// XP_016436414.1 PREDICTED: transcription repressor OFP17-like [Nicotiana tabacum]	--	--	--	--	--	--	--	-	-	-
Unigene000450	291	--	--	--	--	--	--	--	--	--	--	--	-	-	-
Unigene000451	319	--	--	ACP30598.1	disease resistance protein [Brassica rapa subsp. pekinensis]	--	--	At4g16010	KOG0017	FOG: Transposon-encoded proteins with TYA, reverse transcriptase, integrase domains in various combinations	--	--	-	-	-
Unigene000452	543	AT1G26690.1	emp24/gp25L/p24 family/GOLD family protein|Chr1:9224299-9225682 REVERSE LENGTH=214	KVH92726.1	GOLD-like protein [Cynara cardunculus var. scolymus]	sp|Q9LQY3|P24D9_ARATH	Transmembrane emp24 domain-containing protein p24delta9 OS=Arabidopsis thaliana GN=At1g26690 PE=2 SV=1	At1g14010	KOG1691	emp24/gp25L/p24 family of membrane trafficking proteins	--	--	-	-	GO:0031224//intrinsic component of membrane;GO:0044425//membrane part;GO:0016020//membrane
Unigene000453	1277	--	--	--	--	--	--	--	--	--	--	--	-	-	-
Unigene000454	277	AT2G23540.1	GDSL-like Lipase/Acylhydrolase superfamily protein|Chr2:10024366-10026058 FORWARD LENGTH=387	KVI09026.1	Lipase, GDSL [Cynara cardunculus var. scolymus]	sp|O80470|GDL38_ARATH	GDSL esterase/lipase At2g23540 OS=Arabidopsis thaliana GN=At2g23540 PE=2 SV=1	--	--	--	--	--	-	-	-
Unigene000455	224	--	--	--	--	--	--	--	--	--	--	--	-	-	-
Unigene000456	224	--	--	--	--	--	--	--	--	--	--	--	-	-	-
Unigene000457	403	--	--	--	--	--	--	--	--	--	--	--	-	-	-
Unigene000458	220	--	--	--	--	--	--	--	--	--	--	--	-	-	-
Unigene000459	260	--	--	--	--	--	--	--	--	--	--	--	-	-	-
Unigene000460	235	AT3G09060.2	Pentatricopeptide repeat (PPR) superfamily protein|Chr3:2766367-2768430 REVERSE LENGTH=687	KVH94903.1	Pentatricopeptide repeat-containing protein [Cynara cardunculus var. scolymus]	sp|Q9SS81|PP221_ARATH	Pentatricopeptide repeat-containing protein At3g09060 OS=Arabidopsis thaliana GN=At3g09060 PE=2 SV=1	At3g09060	KOG4197	FOG: PPR repeat	--	--	-	-	-
Unigene000461	238	--	--	--	--	--	--	--	--	--	--	--	-	-	-
Unigene000462	499	AT2G39980.1	HXXXD-type acyl-transferase family protein|Chr2:16688437-16689885 REVERSE LENGTH=482	KVI09914.1	Chloramphenicol acetyltransferase-like domain-containing protein [Cynara cardunculus var. scolymus]	sp|Q9FF86|DCR_ARATH	BAHD acyltransferase DCR OS=Arabidopsis thaliana GN=DCR PE=2 SV=1	--	--	--	--	--	-	-	-
Unigene000463	221	AT5G43100.1	Eukaryotic aspartyl protease family protein|Chr5:17299264-17302718 FORWARD LENGTH=631	KVI08940.1	Aspartic peptidase [Cynara cardunculus var. scolymus]	--	--	At3g50050	KOG1339	Aspartyl protease	--	--	GO:0008152//metabolic process;GO:0019538//protein metabolic process;GO:0043170//macromolecule metabolic process;GO:0071704//organic substance metabolic process;GO:0044238//primary metabolic process	GO:0016787//hydrolase activity;GO:0003824//catalytic activity	GO:0016020//membrane;GO:0031224//intrinsic component of membrane;GO:0044425//membrane part
Unigene000464	294	--	--	--	--	--	--	--	--	--	--	--	-	-	-
Unigene000465	228	--	--	--	--	--	--	--	--	--	--	--	-	-	-
Unigene000466	209	--	--	--	--	--	--	--	--	--	--	--	-	-	-
Unigene000467	218	--	--	--	--	--	--	--	--	--	--	--	-	-	-
Unigene000468	214	--	--	--	--	--	--	--	--	--	--	--	-	-	-
Unigene000469	222	--	--	--	--	--	--	--	--	--	--	--	-	-	-
Unigene000470	246	--	--	--	--	--	--	--	--	--	--	--	-	-	-
Unigene000471	697	--	--	KVH97835.1	Ankyrin repeat-containing protein [Cynara cardunculus var. scolymus]	--	--	--	--	--	--	--	-	-	-
Unigene000472	272	--	--	CAE02930.3	OSJNBa0014K14.2 [Oryza sativa Japonica Group]	sp|P10978|POLX_TOBAC	Retrovirus-related Pol polyprotein from transposon TNT 1-94 OS=Nicotiana tabacum PE=2 SV=1	At2g05960	KOG0017	FOG: Transposon-encoded proteins with TYA, reverse transcriptase, integrase domains in various combinations	--	--	-	-	-
Unigene000473	226	--	--	--	--	--	--	--	--	--	--	--	-	-	-
Unigene000474	444	--	--	--	--	--	--	--	--	--	--	--	-	-	-
Unigene000475	352	--	--	--	--	--	--	--	--	--	--	--	-	-	-
Unigene000476	296	--	--	KVI04084.1	Disease resistance protein [Cynara cardunculus var. scolymus]	--	--	--	--	--	--	--	-	-	-
Unigene000477	217	AT4G39010.2	glycosyl hydrolase 9B18|Chr4:18176519-18179102 REVERSE LENGTH=389	KVH96639.1	Glycoside hydrolase, family 9 [Cynara cardunculus var. scolymus]	sp|Q93YQ7|GUN24_ARATH	Endoglucanase 24 OS=Arabidopsis thaliana GN=At4g39010 PE=2 SV=1	--	--	--	K01179//endoglucanase [EC:3.2.1.4]	sot:102579821	-	-	-
Unigene000478	251	AT5G49660.1	Leucine-rich repeat transmembrane protein kinase family protein|Chr5:20161401-20164534 REVERSE LENGTH=966	KVI06791.1	Leucine-rich repeat-containing protein [Cynara cardunculus var. scolymus]	sp|Q9LSI9|BIR2_ARATH	Inactive LRR receptor-like serine/threonine-protein kinase BIR2 OS=Arabidopsis thaliana GN=BIR2 PE=1 SV=1	At5g25910	KOG0619	FOG: Leucine rich repeat	--	--	-	-	-
Unigene000479	401	--	--	--	--	--	--	--	--	--	--	--	-	-	-
Unigene000480	317	--	--	KYP56844.1	Retrovirus-related Pol polyprotein from transposon TNT 1-94 [Cajanus cajan]// KYP56859.1 Retrovirus-related Pol polyprotein from transposon TNT 1-94 [Cajanus cajan]	--	--	At1g26990	KOG0017	FOG: Transposon-encoded proteins with TYA, reverse transcriptase, integrase domains in various combinations	K01183//chitinase [EC:3.2.1.14]	sot:102590164	-	-	-
Unigene000481	357	--	--	--	--	--	--	--	--	--	--	--	-	-	-
Unigene000482	212	--	--	--	--	--	--	--	--	--	--	--	-	-	-
Unigene000483	350	--	--	--	--	--	--	--	--	--	--	--	-	-	-
Unigene000484	369	--	--	--	--	--	--	--	--	--	--	--	-	-	-
Unigene000485	258	--	--	--	--	--	--	--	--	--	--	--	-	-	-
Unigene000486	306	--	--	--	--	--	--	--	--	--	--	--	-	-	-
Unigene000487	400	--	--	--	--	--	--	--	--	--	--	--	-	-	-
Unigene000488	700	AT5G61890.1	Integrase-type DNA-binding superfamily protein|Chr5:24852639-24853744 REVERSE LENGTH=248	KVH99050.1	AP2/ERF domain-containing protein [Cynara cardunculus var. scolymus]	sp|Q9FH54|EF114_ARATH	Ethylene-responsive transcription factor ERF114 OS=Arabidopsis thaliana GN=ERF114 PE=1 SV=1	--	--	--	--	--	GO:0009058//biosynthetic process;GO:0018130//heterocycle biosynthetic process;GO:1901360//organic cyclic compound metabolic process;GO:0034641//cellular nitrogen compound metabolic process;GO:0044237//cellular metabolic process;GO:0097659//nucleic acid-templated transcription;GO:0044249//cellular biosynthetic process;GO:0016070//RNA metabolic process;GO:0006351//transcription, DNA-templated;GO:00…	GO:0097159//organic cyclic compound binding;GO:0001071//nucleic acid binding transcription factor activity;GO:0003676//nucleic acid binding;GO:1901363//heterocyclic compound binding;GO:0005488//binding	GO:0043227//membrane-bounded organelle;GO:0043226//organelle;GO:0044424//intracellular part;GO:0043229//intracellular organelle;GO:0005623//cell;GO:0044464//cell part;GO:0043231//intracellular membrane-bounded organelle;GO:0005622//intracellular
Unigene000489	210	--	--	--	--	--	--	--	--	--	--	--	-	-	-
Unigene000490	232	--	--	--	--	--	--	--	--	--	--	--	-	-	-
Unigene000491	284	--	--	--	--	--	--	--	--	--	--	--	-	-	-
Unigene000492	951	--	--	--	--	--	--	--	--	--	--	--	-	-	-
Unigene000493	357	--	--	--	--	--	--	--	--	--	--	--	-	-	-
Unigene000494	224	--	--	CAC95126.1	gag-pol polyprotein [Populus deltoides]	--	--	--	--	--	--	--	-	-	-
Unigene000495	661	--	--	--	--	--	--	--	--	--	--	--	-	-	-
Unigene000496	263	--	--	--	--	--	--	--	--	--	--	--	-	-	-
Unigene000497	2762	AT4G32430.1	Pentatricopeptide repeat (PPR) superfamily protein|Chr4:15652982-15655273 FORWARD LENGTH=763	KVH93789.1	Pentatricopeptide repeat-containing protein [Cynara cardunculus var. scolymus]	sp|Q84MA3|PP345_ARATH	Pentatricopeptide repeat-containing protein At4g32430, mitochondrial OS=Arabidopsis thaliana GN=PCMP-E40 PE=2 SV=1	At4g32430	KOG4197	FOG: PPR repeat	--	--	-	-	-
Unigene000498	509	--	--	XP_008798848.1	PREDICTED: glycine-rich protein-like [Phoenix dactylifera]	--	--	--	--	--	--	--	-	-	-
Unigene000499	424	AT3G55320.1	P-glycoprotein 20|Chr3:20507391-20513393 REVERSE LENGTH=1408	XP_017256722.1	PREDICTED: ABC transporter B family member 13-like [Daucus carota subsp. sativus]	sp|Q9M3B9|AB20B_ARATH	ABC transporter B family member 20 OS=Arabidopsis thaliana GN=ABCB20 PE=1 SV=1	At3g55320	KOG0055	Multidrug/pheromone exporter, ABC superfamily	K05658//ATP-binding cassette, subfamily B (MDR/TAP), member 1 [EC:3.6.3.44]	vvi:104882259	-	-	-
Unigene000500	343	ATMG00810.1	DNA/RNA polymerases superfamily protein|ChrM:227709-228431 REVERSE LENGTH=240	XP_013645729.1	PREDICTED: uncharacterized mitochondrial protein AtMg00810-like [Brassica napus]// XP_013721055.1 PREDICTED: uncharacterized mitochondrial protein AtMg00810-like [Brassica napus]	sp|P92519|M810_ARATH	Uncharacterized mitochondrial protein AtMg00810 OS=Arabidopsis thaliana GN=AtMg00810 PE=4 SV=1	At1g34090	KOG0017	FOG: Transposon-encoded proteins with TYA, reverse transcriptase, integrase domains in various combinations	--	--	-	-	-
Unigene000501	574	--	--	--	--	--	--	--	--	--	--	--	-	-	-
Unigene000502	223	--	--	--	--	--	--	--	--	--	--	--	-	-	-
Unigene000503	219	AT4G23160.3	cysteine-rich RECEPTOR-like kinase|Chr4:12129485-12133157 FORWARD LENGTH=1043	KYP62034.1	Retrovirus-related Pol polyprotein from transposon TNT 1-94, partial [Cajanus cajan]	sp|P10978|POLX_TOBAC	Retrovirus-related Pol polyprotein from transposon TNT 1-94 OS=Nicotiana tabacum PE=2 SV=1	At4g04410	KOG0017	FOG: Transposon-encoded proteins with TYA, reverse transcriptase, integrase domains in various combinations	--	--	-	-	-
Unigene000504	247	AT4G23160.3	cysteine-rich RECEPTOR-like kinase|Chr4:12129485-12133157 FORWARD LENGTH=1043	KYP62034.1	Retrovirus-related Pol polyprotein from transposon TNT 1-94, partial [Cajanus cajan]	sp|P10978|POLX_TOBAC	Retrovirus-related Pol polyprotein from transposon TNT 1-94 OS=Nicotiana tabacum PE=2 SV=1	At1g56675	KOG0017	FOG: Transposon-encoded proteins with TYA, reverse transcriptase, integrase domains in various combinations	--	--	-	-	-
Unigene000505	236	--	--	--	--	--	--	--	--	--	--	--	-	-	-
Unigene000506	452	--	--	--	--	--	--	--	--	--	--	--	-	-	-
Unigene000507	1155	--	--	--	--	--	--	--	--	--	--	--	-	-	-
Unigene000508	409	--	--	--	--	--	--	--	--	--	--	--	-	-	-
Unigene000509	460	--	--	--	--	--	--	--	--	--	--	--	-	-	-
Unigene000510	212	AT4G23160.3	cysteine-rich RECEPTOR-like kinase|Chr4:12129485-12133157 FORWARD LENGTH=1043	AAG44320.1	reverse transcriptase-like protein, partial [Amaranthus hybridus]	sp|P10978|POLX_TOBAC	Retrovirus-related Pol polyprotein from transposon TNT 1-94 OS=Nicotiana tabacum PE=2 SV=1	At1g37110	KOG0017	FOG: Transposon-encoded proteins with TYA, reverse transcriptase, integrase domains in various combinations	--	--	-	-	-
Unigene000511	384	AT5G49980.1	auxin F-box protein 5|Chr5:20334420-20336531 REVERSE LENGTH=619	XP_010272955.1	PREDICTED: transport inhibitor response 1-like protein [Nelumbo nucifera]	sp|Q9LTX2|TIR1L_ARATH	Transport inhibitor response 1-like protein OS=Arabidopsis thaliana GN=At5g49980 PE=2 SV=1	At5g49980	KOG1947	Leucine rich repeat proteins, some proteins contain F-box	--	--	-	-	-
Unigene000512	694	AT1G47890.1	receptor like protein 7|Chr1:17643976-17647035 FORWARD LENGTH=1019	KVI10573.1	Leucine-rich repeat-containing protein [Cynara cardunculus var. scolymus]	sp|Q9C9H7|RLP12_ARATH	Receptor-like protein 12 OS=Arabidopsis thaliana GN=RLP12 PE=2 SV=2	At1g47890	KOG0619	FOG: Leucine rich repeat	--	--	-	-	-
Unigene000513	516	--	--	--	--	--	--	--	--	--	--	--	-	-	-
Unigene000514	223	ATMG00860.1	DNA/RNA polymerases superfamily protein|ChrM:235916-236392 FORWARD LENGTH=158	ABM55240.1	retrotransposon protein [Beta vulgaris]	sp|P92523|M860_ARATH	Uncharacterized mitochondrial protein AtMg00860 OS=Arabidopsis thaliana GN=AtMg00860 PE=4 SV=1	At4g03650	KOG0017	FOG: Transposon-encoded proteins with TYA, reverse transcriptase, integrase domains in various combinations	--	--	-	GO:0043167//ion binding;GO:0005488//binding;GO:0043169//cation binding;GO:0046872//metal ion binding	-
Unigene000515	692	--	--	--	--	--	--	--	--	--	--	--	-	-	-
Unigene000516	393	--	--	--	--	--	--	--	--	--	--	--	-	-	-
Unigene000517	1028	--	--	KYP60112.1	Retrovirus-related Pol polyprotein from transposon 297 family [Cajanus cajan]	--	--	--	--	--	--	--	-	-	-
Unigene000518	240	--	--	--	--	--	--	--	--	--	--	--	-	-	-
Unigene000519	540	--	--	--	--	--	--	--	--	--	--	--	-	-	-
Unigene000520	220	AT2G46660.1	cytochrome P450%2C family 78%2C subfamily A%2C polypeptide 6|Chr2:19153602-19155417 REVERSE LENGTH=530	KVH97831.1	cytochrome P450 [Cynara cardunculus var. scolymus]	sp|Q9ZNR0|C78A6_ARATH	Cytochrome P450 78A6 OS=Arabidopsis thaliana GN=CYP78A6 PE=2 SV=1	At2g46660	KOG0156	Cytochrome P450 CYP2 subfamily	--	--	-	-	-
Unigene000521	267	--	--	--	--	--	--	--	--	--	--	--	-	-	-
Unigene000522	234	--	--	KVI09532.1	cytochrome P450 [Cynara cardunculus var. scolymus]	--	--	--	--	--	--	--	-	-	-
Unigene000523	403	--	--	KVH93678.1	Ovarian tumor, otubain [Cynara cardunculus var. scolymus]	--	--	At3g62940	KOG2606	OTU (ovarian tumor)-like cysteine protease	K18342//OTU domain-containing protein 6 [EC:3.4.19.12]	sly:101251574	-	-	-
Unigene000524	252	--	--	--	--	--	--	--	--	--	--	--	-	-	-
Unigene000525	386	--	--	XP_019107772.1	PREDICTED: uncharacterized protein LOC109136281 [Beta vulgaris subsp. vulgaris]	--	--	--	--	--	--	--	-	-	-
Unigene000526	228	--	--	--	--	--	--	--	--	--	--	--	-	-	-
Unigene000527	949	--	--	--	--	--	--	--	--	--	--	--	-	-	-
Unigene000528	276	--	--	--	--	--	--	--	--	--	--	--	-	-	-
Unigene000529	482	AT5G09400.1	K+ uptake permease 7|Chr5:2916377-2920604 FORWARD LENGTH=858	KVI01815.1	potassium transporter [Cynara cardunculus var. scolymus]	sp|Q9FY75|POT7_ARATH	Potassium transporter 7 OS=Arabidopsis thaliana GN=POT7 PE=1 SV=2	--	--	--	--	--	-	-	-
Unigene000530	327	--	--	--	--	--	--	--	--	--	--	--	-	-	-
Unigene000531	382	AT5G10720.1	histidine kinase 5|Chr5:3386835-3390541 FORWARD LENGTH=922	XP_017251894.1	PREDICTED: histidine kinase CKI1-like [Daucus carota subsp. sativus]	sp|Q5A599|NIK1_CANAL	Histidine protein kinase NIK1 OS=Candida albicans (strain SC5314 / ATCC MYA-2876) GN=NIK1 PE=1 SV=2	At5g10720	KOG0519	Sensory transduction histidine kinase	K14489//arabidopsis histidine kinase 2/3/4 (cytokinin receptor) [EC:2.7.13.3]	gmx:100818481	GO:0044699//single-organism process;GO:0007165//signal transduction;GO:0006950//response to stress;GO:0023052//signaling;GO:0050896//response to stimulus;GO:0040007//growth;GO:0048583//regulation of response to stimulus;GO:0050794//regulation of cellular process;GO:0048518//positive regulation of biological process;GO:0009605//response to external stimulus;GO:0042594//response to starvation;GO:00…	GO:0016740//transferase activity;GO:0003824//catalytic activity;GO:0016301//kinase activity;GO:0016772//transferase activity, transferring phosphorus-containing groups;GO:0004672//protein kinase activity;GO:0016773//phosphotransferase activity, alcohol group as acceptor	-
Unigene000532	258	--	--	--	--	--	--	--	--	--	--	--	-	-	-
Unigene000533	690	--	--	--	--	--	--	--	--	--	--	--	-	-	-
Unigene000534	777	--	--	--	--	--	--	--	--	--	--	--	-	-	-
Unigene000535	553	ATMG00160.1	cytochrome oxidase 2|ChrM:40502-42628 REVERSE LENGTH=260	YP_009317558.1	cytochrome c oxidase subunit 2 (mitochondrion) [Gelidium sinicola]// AOX49010.1 cytochrome c oxidase subunit 2 (mitochondrion) [Gelidium sinicola]	sp|P29860|COX2_DROLO	Cytochrome c oxidase subunit 2 OS=Drosophila lowei GN=mt:CoII PE=3 SV=1	DmMi004	KOG4766	Uncharacterized conserved protein	K02261//cytochrome c oxidase subunit 2	cvr:OJ20_p06	GO:0055114//oxidation-reduction process;GO:0008152//metabolic process;GO:0009987//cellular process;GO:0006091//generation of precursor metabolites and energy;GO:0044237//cellular metabolic process;GO:0044699//single-organism process;GO:0044763//single-organism cellular process;GO:0044710//single-organism metabolic process	-	GO:0016020//membrane;GO:0005623//cell;GO:0005737//cytoplasm;GO:0043229//intracellular organelle;GO:0005740//mitochondrial envelope;GO:0044422//organelle part;GO:0031975//envelope;GO:0005622//intracellular;GO:0031967//organelle envelope;GO:0044429//mitochondrial part;GO:0043227//membrane-bounded organelle;GO:0044464//cell part;GO:0044444//cytoplasmic part;GO:0005739//mitochondrion;GO:0044424//intr…
Unigene000536	261	--	--	--	--	--	--	--	--	--	--	--	-	-	-
Unigene000537	270	--	--	XP_015073062.1	PREDICTED: UPF0481 protein At3g47200-like [Solanum pennellii]	--	--	--	--	--	--	--	-	-	-
Unigene000538	261	--	--	--	--	--	--	--	--	--	--	--	-	-	-
Unigene000539	208	--	--	--	--	--	--	--	--	--	--	--	-	-	-
Unigene000540	247	--	--	KVI10627.1	hypothetical protein Ccrd_010998, partial [Cynara cardunculus var. scolymus]	--	--	--	--	--	--	--	-	-	-
Unigene000541	442	--	--	KVI10627.1	hypothetical protein Ccrd_010998, partial [Cynara cardunculus var. scolymus]	--	--	--	--	--	--	--	-	-	-
Unigene000542	632	--	--	--	--	--	--	--	--	--	--	--	-	-	-
Unigene000543	289	--	--	--	--	--	--	--	--	--	--	--	-	-	-
Unigene000544	245	--	--	KVH92542.1	Lipase, class 3, partial [Cynara cardunculus var. scolymus]	--	--	--	--	--	--	--	-	-	-
Unigene000545	406	--	--	--	--	--	--	--	--	--	--	--	-	-	-
Unigene000546	218	--	--	--	--	--	--	--	--	--	--	--	-	-	-
Unigene000547	260	AT2G05990.2	NAD(P)-binding Rossmann-fold superfamily protein|Chr2:2322876-2324867 FORWARD LENGTH=390	XP_010496671.2	PREDICTED: enoyl-[acyl-carrier-protein] reductase [NADH], chloroplastic-like [Camelina sativa]	sp|Q6Z0I4|FABI1_ORYSJ	Enoyl-[acyl-carrier-protein] reductase [NADH] 1, chloroplastic OS=Oryza sativa subsp. japonica GN=Os08g0327400 PE=2 SV=1	At2g05990	KOG0725	Reductases with broad range of substrate specificities	K00208//enoyl-[acyl-carrier protein] reductase I [EC:1.3.1.9 1.3.1.10]	egr:104445826	-	-	-
Unigene000548	239	--	--	--	--	--	--	--	--	--	--	--	-	-	-
Unigene000549	466	--	--	KVI12537.1	F-box domain, cyclin-like protein [Cynara cardunculus var. scolymus]	--	--	--	--	--	--	--	-	-	GO:0016020//membrane;GO:0044425//membrane part;GO:0031224//intrinsic component of membrane
Unigene000550	326	AT2G23200.1	Protein kinase superfamily protein|Chr2:9879351-9881855 FORWARD LENGTH=834	KVH99815.1	Protein kinase, ATP binding site-containing protein, partial [Cynara cardunculus var. scolymus]	sp|O22187|Y2232_ARATH	Probable receptor-like protein kinase At2g23200 OS=Arabidopsis thaliana GN=At2g23200 PE=3 SV=1	At2g11520	KOG1187	Serine/threonine protein kinase	--	--	-	-	-
Unigene000551	342	--	--	--	--	--	--	--	--	--	--	--	-	-	-
Unigene000552	213	--	--	--	--	--	--	--	--	--	--	--	-	-	-
Unigene000553	202	--	--	--	--	--	--	--	--	--	--	--	-	-	-
Unigene000554	217	--	--	--	--	--	--	--	--	--	--	--	-	-	-
Unigene000555	223	--	--	--	--	--	--	--	--	--	--	--	-	-	-
Unigene000556	253	AT4G23160.3	cysteine-rich RECEPTOR-like kinase|Chr4:12129485-12133157 FORWARD LENGTH=1043	XP_017228100.1	PREDICTED: uncharacterized mitochondrial protein AtMg00810-like [Daucus carota subsp. sativus]	sp|P92519|M810_ARATH	Uncharacterized mitochondrial protein AtMg00810 OS=Arabidopsis thaliana GN=AtMg00810 PE=4 SV=1	At1g33817	KOG0017	FOG: Transposon-encoded proteins with TYA, reverse transcriptase, integrase domains in various combinations	--	--	-	-	-
Unigene000557	256	ATMG00810.1	DNA/RNA polymerases superfamily protein|ChrM:227709-228431 REVERSE LENGTH=240	XP_013645548.1	PREDICTED: uncharacterized mitochondrial protein AtMg00810-like [Brassica napus]	sp|P10978|POLX_TOBAC	Retrovirus-related Pol polyprotein from transposon TNT 1-94 OS=Nicotiana tabacum PE=2 SV=1	At2g05390	KOG0017	FOG: Transposon-encoded proteins with TYA, reverse transcriptase, integrase domains in various combinations	--	--	-	-	-
Unigene000558	628	--	--	--	--	--	--	--	--	--	--	--	-	-	-
Unigene000559	287	--	--	--	--	--	--	--	--	--	--	--	-	-	-
Unigene000560	280	AT3G45010.1	serine carboxypeptidase-like 48|Chr3:16466328-16468845 FORWARD LENGTH=510	XP_009131902.1	PREDICTED: serine carboxypeptidase-like 47 [Brassica rapa]// XP_013733530.1 PREDICTED: serine carboxypeptidase-like 47 [Brassica napus]// CDX88773.1 BnaA03g08760D [Brassica napus]	sp|Q56WF8|SCP48_ARATH	Serine carboxypeptidase-like 48 OS=Arabidopsis thaliana GN=SCPL48 PE=2 SV=2	At3g45010	KOG1282	Serine carboxypeptidases (lysosomal cathepsin A)	K16298//serine carboxypeptidase-like clade IV [EC:3.4.16.-]	vvi:100233022	-	-	-
Unigene000561	251	--	--	--	--	--	--	--	--	--	--	--	-	-	-
Unigene000562	325	--	--	--	--	--	--	--	--	--	--	--	-	-	-
Unigene000563	261	--	--	--	--	--	--	--	--	--	--	--	-	-	-
Unigene000564	410	--	--	--	--	--	--	--	--	--	--	--	-	-	-
Unigene000565	963	AT5G56110.1	myb domain protein 103|Chr5:22719191-22720664 FORWARD LENGTH=320	XP_002268897.1	PREDICTED: transcription factor MYB80 [Vitis vinifera]	sp|Q7XQN1|MYB80_ORYSJ	Transcription factor MYB80 OS=Oryza sativa subsp. japonica GN=MYB80 PE=2 SV=2	At5g56110	KOG0048	Transcription factor, Myb superfamily	K09422//myb proto-oncogene protein, plant	vvi:100265285	-	-	-
Unigene000566	210	--	--	--	--	--	--	--	--	--	--	--	-	-	-
Unigene000567	232	--	--	--	--	sp|Q9U943|APLP_LOCMI	Apolipophorins OS=Locusta migratoria PE=1 SV=2	--	--	--	--	--	-	-	-
Unigene000568	318	--	--	--	--	--	--	--	--	--	--	--	-	-	-
Unigene000569	292	--	--	OMO75305.1	Integrase, catalytic core [Corchorus capsularis]	--	--	At2g16670	KOG0017	FOG: Transposon-encoded proteins with TYA, reverse transcriptase, integrase domains in various combinations	--	--	GO:0008152//metabolic process;GO:0009987//cellular process;GO:0044237//cellular metabolic process	-	-
Unigene000570	738	AT4G29530.1	Pyridoxal phosphate phosphatase-related protein|Chr4:14496164-14497310 FORWARD LENGTH=245	XP_012051682.1	pyridoxal phosphate phosphatase phospho2 [Cryptococcus neoformans var. grubii H99]// AFR96968.1 pyridoxal phosphate phosphatase phospho2 [Cryptococcus neoformans var. grubii H99]	sp|Q66KD6|PHOP2_XENTR	Probable phosphatase phospho2 OS=Xenopus tropicalis GN=phospho2 PE=2 SV=1	At4g29530	KOG3120	Predicted haloacid dehalogenase-like hydrolase	K06124//phosphoethanolamine/phosphocholine phosphatase [EC:3.1.3.75]	sita:101772309	-	-	-
Unigene000571	349	--	--	--	--	--	--	--	--	--	--	--	-	-	-
Unigene000572	241	--	--	--	--	--	--	--	--	--	--	--	-	-	-
Unigene000573	225	--	--	--	--	--	--	--	--	--	--	--	-	-	-
Unigene000574	308	--	--	--	--	--	--	--	--	--	--	--	-	-	-
Unigene000575	362	--	--	--	--	--	--	--	--	--	--	--	-	-	-
Unigene000576	248	--	--	--	--	--	--	--	--	--	--	--	-	-	-
Unigene000577	205	--	--	--	--	--	--	--	--	--	--	--	-	-	-
Unigene000578	299	--	--	--	--	--	--	--	--	--	--	--	-	-	-
Unigene000579	820	AT3G42960.1	TAPETUM 1|Chr3:15018735-15019656 REVERSE LENGTH=272	KVH91557.1	Glucose/ribitol dehydrogenase [Cynara cardunculus var. scolymus]	sp|Q9M1K9|ATA1_ARATH	Short-chain dehydrogenase reductase ATA1 OS=Arabidopsis thaliana GN=TA1 PE=2 SV=1	At3g42960	KOG0725	Reductases with broad range of substrate specificities	--	--	-	-	-
Unigene000580	629	AT5G01580.1	gamma interferon responsive lysosomal thiol (GILT) reductase family protein|Chr5:222760-223852 REVERSE LENGTH=233	XP_009804800.1	PREDICTED: gamma-interferon-inducible lysosomal thiol reductase isoform X3 [Nicotiana sylvestris]// XP_016497571.1 PREDICTED: gamma-interferon-inducible lysosomal thiol reductase-like isoform X2 [Nicotiana tabacum]	sp|Q9ESY9|GILT_MOUSE	Gamma-interferon-inducible lysosomal thiol reductase OS=Mus musculus GN=Ifi30 PE=1 SV=3	At5g01580	KOG3160	Gamma-interferon inducible lysosomal thiol reductase	K08059//interferon, gamma-inducible protein 30	sot:102601091	-	-	-
Unigene000581	770	AT1G07080.1	Thioredoxin superfamily protein|Chr1:2170069-2171861 FORWARD LENGTH=265	XP_010325743.1	PREDICTED: gamma-interferon-inducible lysosomal thiol reductase isoform X1 [Solanum lycopersicum]	sp|Q9ESY9|GILT_MOUSE	Gamma-interferon-inducible lysosomal thiol reductase OS=Mus musculus GN=Ifi30 PE=1 SV=3	At1g07080	KOG3160	Gamma-interferon inducible lysosomal thiol reductase	K08059//interferon, gamma-inducible protein 30	sot:102601091	-	-	-
Unigene000582	389	--	--	XP_002283339.2	PREDICTED: UPF0481 protein At3g47200 [Vitis vinifera]// XP_010654048.1 PREDICTED: UPF0481 protein At3g47200 [Vitis vinifera]	--	--	--	--	--	--	--	-	-	-
Unigene000583	213	--	--	--	--	--	--	--	--	--	--	--	-	-	-
Unigene000584	341	--	--	--	--	--	--	--	--	--	--	--	-	-	-
Unigene000585	490	AT4G34590.1	G-box binding factor 6|Chr4:16522449-16522928 FORWARD LENGTH=159	KVH99852.1	Basic-leucine zipper domain-containing protein [Cynara cardunculus var. scolymus]	sp|Q9LZP8|BZP53_ARATH	bZIP transcription factor 53 OS=Arabidopsis thaliana GN=BZIP53 PE=1 SV=1	--	--	--	--	--	-	-	-
Unigene000586	380	AT3G26744.4	basic helix-loop-helix (bHLH) DNA-binding superfamily protein|Chr3:9832953-9834790 REVERSE LENGTH=494	XP_009625133.1	PREDICTED: transcription factor ICE1-like [Nicotiana tomentosiformis]	sp|Q9LSE2|ICE1_ARATH	Transcription factor ICE1 OS=Arabidopsis thaliana GN=SCRM PE=1 SV=1	--	--	--	--	--	-	-	-
Unigene000587	212	AT1G15520.2	pleiotropic drug resistance 12|Chr1:5332561-5338175 REVERSE LENGTH=1292	XP_014496333.1	PREDICTED: ABC transporter G family member 39-like [Vigna radiata var. radiata]	sp|Q2PCF1|PDR2_NICPL	Pleiotropic drug resistance protein 2 OS=Nicotiana plumbaginifolia GN=PDR2 PE=2 SV=1	At1g15520	KOG0065	Pleiotropic drug resistance proteins (PDR1-15), ABC superfamily	--	--	GO:0051179//localization;GO:0051234//establishment of localization	GO:0032550//purine ribonucleoside binding;GO:0016787//hydrolase activity;GO:0016818//hydrolase activity, acting on acid anhydrides, in phosphorus-containing anhydrides;GO:0016462//pyrophosphatase activity;GO:0017111//nucleoside-triphosphatase activity;GO:0097367//carbohydrate derivative binding;GO:0001882//nucleoside binding;GO:0016817//hydrolase activity, acting on acid anhydrides;GO:0005488//bi…	GO:0031224//intrinsic component of membrane;GO:0016020//membrane;GO:0044425//membrane part
Unigene000588	229	--	--	--	--	--	--	--	--	--	--	--	-	-	-
Unigene000589	217	--	--	--	--	--	--	--	--	--	--	--	-	-	-
Unigene000590	243	--	--	--	--	--	--	--	--	--	--	--	-	-	-
Unigene000591	214	--	--	--	--	--	--	--	--	--	--	--	-	-	-
Unigene000592	265	--	--	--	--	--	--	--	--	--	--	--	-	-	-
Unigene000593	230	--	--	--	--	--	--	--	--	--	--	--	-	-	-
Unigene000594	241	--	--	--	--	--	--	--	--	--	--	--	-	-	-
Unigene000595	293	--	--	--	--	--	--	--	--	--	--	--	-	-	-
Unigene000596	641	--	--	--	--	--	--	--	--	--	--	--	-	-	-
Unigene000597	202	--	--	--	--	--	--	--	--	--	--	--	-	-	-
Unigene000598	224	--	--	--	--	--	--	--	--	--	--	--	-	-	-
Unigene000599	232	--	--	--	--	--	--	--	--	--	--	--	-	-	-
Unigene000600	207	--	--	--	--	--	--	--	--	--	--	--	-	-	-
Unigene000601	388	--	--	--	--	--	--	--	--	--	--	--	-	-	-
Unigene000602	219	AT2G19570.1	cytidine deaminase 1|Chr2:8470598-8471503 REVERSE LENGTH=301	XP_019247602.1	PREDICTED: cytidine deaminase 1-like [Nicotiana attenuata]// OIT02301.1 cytidine deaminase 1 [Nicotiana attenuata]	sp|O65896|CDA1_ARATH	Cytidine deaminase 1 OS=Arabidopsis thaliana GN=CDA1 PE=1 SV=1	At2g19570	KOG0833	Cytidine deaminase	K01489//cytidine deaminase [EC:3.5.4.5]	pop:POPTR_0006s15510g	GO:0034641//cellular nitrogen compound metabolic process;GO:1901565//organonitrogen compound catabolic process;GO:0044710//single-organism metabolic process;GO:0009119//ribonucleoside metabolic process;GO:1901135//carbohydrate derivative metabolic process;GO:0044763//single-organism cellular process;GO:0046087//cytidine metabolic process;GO:0006807//nitrogen compound metabolic process;GO:0009987/…	GO:0016787//hydrolase activity;GO:0043169//cation binding;GO:0003824//catalytic activity;GO:0016814//hydrolase activity, acting on carbon-nitrogen (but not peptide) bonds, in cyclic amidines;GO:0005488//binding;GO:0016810//hydrolase activity, acting on carbon-nitrogen (but not peptide) bonds;GO:0046872//metal ion binding;GO:0043167//ion binding;GO:0046914//transition metal ion binding	-
Unigene000603	501	--	--	--	--	--	--	--	--	--	--	--	-	-	-
Unigene000604	375	--	--	--	--	--	--	--	--	--	--	--	-	-	-
Unigene000605	294	AT2G32590.1	condensin complex subunit|Chr2:13829420-13833209 REVERSE LENGTH=671	KVI10679.1	Condensin complex subunit 2/barren [Cynara cardunculus var. scolymus]	sp|Q564K3|CND2_ARATH	Condensin complex subunit 2 OS=Arabidopsis thaliana GN=CAPH PE=1 SV=1	At2g32590	KOG2328	Chromosome condensation complex Condensin, subunit H	K06676//condensin complex subunit 2	pmum:103329315	-	-	-
Unigene000606	510	AT1G22200.2	Endoplasmic reticulum vesicle transporter protein|Chr1:7838104-7840602 REVERSE LENGTH=338	KVI01811.1	Endoplasmic reticulum vesicle transporter, C-terminal [Cynara cardunculus var. scolymus]	sp|Q66KH2|ERGI3_XENLA	Endoplasmic reticulum-Golgi intermediate compartment protein 3 OS=Xenopus laevis GN=ergic3 PE=2 SV=1	At1g22200	KOG2667	COPII vesicle protein	--	--	-	-	GO:0016020//membrane;GO:0031224//intrinsic component of membrane;GO:0044425//membrane part
Unigene000607	270	AT1G04120.3	multidrug resistance-associated protein 5|Chr1:1064848-1070396 REVERSE LENGTH=1479	KVI12336.1	AAA+ ATPase domain-containing protein [Cynara cardunculus var. scolymus]	sp|Q7GB25|AB5C_ARATH	ABC transporter C family member 5 OS=Arabidopsis thaliana GN=ABCC5 PE=2 SV=2	At1g04120	KOG0054	Multidrug resistance-associated protein/mitoxantrone resistance protein, ABC superfamily	--	--	-	-	-
Unigene000608	315	ATMG00300.1	Gag-Pol-related retrotransposon family protein|ChrM:89617-90054 REVERSE LENGTH=145	KZV32174.1	retrovirus-related Pol polyprotein from transposon TNT 1-94 [Dorcoceras hygrometricum]	sp|P10978|POLX_TOBAC	Retrovirus-related Pol polyprotein from transposon TNT 1-94 OS=Nicotiana tabacum PE=2 SV=1	At1g48710	KOG0017	FOG: Transposon-encoded proteins with TYA, reverse transcriptase, integrase domains in various combinations	--	--	-	-	-
Unigene000609	722	AT2G31500.1	calcium-dependent protein kinase 24|Chr2:13414016-13416324 FORWARD LENGTH=582	AAZ76711.1	calcium-dependent protein kinase 2 [Petunia integrifolia subsp. inflata]	sp|Q9SIQ7|CDPKO_ARATH	Calcium-dependent protein kinase 24 OS=Arabidopsis thaliana GN=CPK24 PE=2 SV=1	At2g31500	KOG0032	Ca2+/calmodulin-dependent protein kinase, EF-Hand protein superfamily	K13412//calcium-dependent protein kinase [EC:2.7.11.1]	vvi:100250838	-	-	-
Unigene000610	237	AT1G62290.2	Saposin-like aspartyl protease family protein|Chr1:23010107-23012681 REVERSE LENGTH=513	XP_016557831.1	PREDICTED: aspartic proteinase-like [Capsicum annuum]	sp|Q8VYL3|APA2_ARATH	Aspartic proteinase A2 OS=Arabidopsis thaliana GN=APA2 PE=2 SV=1	At1g62290	KOG1339	Aspartyl protease	K08245//phytepsin [EC:3.4.23.40]	sot:102606096	-	-	-
Unigene000611	296	--	--	--	--	--	--	--	--	--	--	--	-	-	-
Unigene000612	598	--	--	--	--	--	--	--	--	--	--	--	-	-	-
Unigene000613	304	--	--	--	--	--	--	--	--	--	--	--	-	-	-
Unigene000614	211	--	--	--	--	--	--	--	--	--	--	--	-	-	-
Unigene000615	417	--	--	--	--	--	--	--	--	--	--	--	-	-	-
Unigene000616	295	--	--	--	--	--	--	--	--	--	--	--	-	-	-
Unigene000617	233	--	--	--	--	--	--	--	--	--	--	--	-	-	-
Unigene000618	220	--	--	--	--	--	--	--	--	--	--	--	-	-	-
Unigene000619	203	--	--	--	--	--	--	--	--	--	--	--	-	-	-
Unigene000620	227	--	--	XP_003842467.1	similar to trypsin-like protease 1 [Leptosphaeria maculans JN3]// CBX98988.1 similar to trypsin-like protease 1 [Leptosphaeria maculans JN3]	sp|P00765|TRYP_ASTAS	Trypsin-1 OS=Astacus astacus PE=1 SV=1	7297481	KOG3627	Trypsin	--	--	-	GO:0008233//peptidase activity;GO:0016787//hydrolase activity;GO:0003824//catalytic activity	-
Unigene000621	313	--	--	--	--	--	--	--	--	--	--	--	-	-	-
Unigene000622	687	AT3G44610.1	Protein kinase superfamily protein|Chr3:16188266-16192107 REVERSE LENGTH=451	XP_017235115.1	PREDICTED: serine/threonine-protein kinase D6PK-like [Daucus carota subsp. sativus]	sp|Q9LTW5|AGC15_ARATH	Serine/threonine-protein kinase AGC1-5 OS=Arabidopsis thaliana GN=AGC1-5 PE=1 SV=1	At3g44610	KOG0610	Putative serine/threonine protein kinase	--	--	GO:0009987//cellular process;GO:0044237//cellular metabolic process;GO:0006796//phosphate-containing compound metabolic process;GO:0006793//phosphorus metabolic process;GO:0008152//metabolic process	-	-
Unigene000623	216	--	--	--	--	--	--	--	--	--	--	--	-	-	-
Unigene000624	858	--	--	--	--	--	--	--	--	--	--	--	-	-	-
Unigene000625	492	--	--	--	--	--	--	--	--	--	--	--	-	-	-
Unigene000626	263	--	--	KYP69952.1	Copia protein [Cajanus cajan]	--	--	At1g34904	KOG0017	FOG: Transposon-encoded proteins with TYA, reverse transcriptase, integrase domains in various combinations	--	--	-	-	-
Unigene000627	224	--	--	--	--	--	--	--	--	--	--	--	-	-	-
Unigene000628	304	--	--	--	--	--	--	--	--	--	--	--	-	-	-
Unigene000629	415	--	--	EOX94092.1	Gag protease polyprotein [Theobroma cacao]	sp|Q7LHG5|YI31B_YEAST	Transposon Ty3-I Gag-Pol polyprotein OS=Saccharomyces cerevisiae (strain ATCC 204508 / S288c) GN=TY3B-I PE=3 SV=2	At2g10780	KOG0017	FOG: Transposon-encoded proteins with TYA, reverse transcriptase, integrase domains in various combinations	--	--	GO:0006139//nucleobase-containing compound metabolic process;GO:1901360//organic cyclic compound metabolic process;GO:0044260//cellular macromolecule metabolic process;GO:0044238//primary metabolic process;GO:0044237//cellular metabolic process;GO:0006725//cellular aromatic compound metabolic process;GO:0090304//nucleic acid metabolic process;GO:0071704//organic substance metabolic process;GO:000…	GO:0070011//peptidase activity, acting on L-amino acid peptides;GO:0004175//endopeptidase activity;GO:0016787//hydrolase activity;GO:0043169//cation binding;GO:0046914//transition metal ion binding;GO:0008233//peptidase activity;GO:0043167//ion binding;GO:0046872//metal ion binding;GO:0003824//catalytic activity;GO:0005488//binding	-
Unigene000630	342	--	--	--	--	--	--	--	--	--	--	--	-	-	-
Unigene000631	354	--	--	--	--	--	--	--	--	--	--	--	-	-	-
Unigene000632	351	--	--	--	--	--	--	--	--	--	--	--	-	-	-
Unigene000633	225	--	--	--	--	--	--	--	--	--	--	--	-	-	-
Unigene000634	218	--	--	--	--	--	--	--	--	--	--	--	-	-	-
Unigene000635	320	--	--	GAV75341.1	zf-CCHC domain-containing protein/DUF4219 domain-containing protein/UBN2 domain-containing protein, partial [Cephalotus follicularis]	--	--	At1g36035	KOG0017	FOG: Transposon-encoded proteins with TYA, reverse transcriptase, integrase domains in various combinations	--	--	-	-	-
Unigene000636	232	--	--	--	--	--	--	--	--	--	--	--	-	-	-
Unigene000637	205	--	--	--	--	--	--	--	--	--	--	--	-	-	-
Unigene000638	395	AT3G42660.1	transducin family protein / WD-40 repeat family protein|Chr3:14751280-14755701 FORWARD LENGTH=953	XP_009787391.1	PREDICTED: WD repeat and HMG-box DNA-binding protein 1 [Nicotiana sylvestris]	sp|P49846|TAF5_DROME	Transcription initiation factor TFIID subunit 5 OS=Drosophila melanogaster GN=Taf5 PE=1 SV=1	At3g42660	KOG1274	WD40 repeat protein	K11274//chromosome transmission fidelity protein 4	csv:101211738	-	-	-
Unigene000639	277	AT3G14180.1	sequence-specific DNA binding transcription factor|Chr3:4707290-4708621 REVERSE LENGTH=443	XP_018501487.1	PREDICTED: trihelix transcription factor ASIL2-like [Pyrus x bretschneideri]	--	--	At3g14180	KOG4282	Transcription factor GT-2 and related proteins, contains trihelix DNA-binding/SANT domain	--	--	-	-	-
Unigene000640	257	--	--	--	--	--	--	--	--	--	--	--	-	-	-
Unigene000641	272	--	--	--	--	--	--	--	--	--	--	--	-	-	-
Unigene000642	301	--	--	--	--	--	--	--	--	--	--	--	-	-	-
Unigene000643	300	--	--	--	--	--	--	--	--	--	--	--	-	-	-
Unigene000644	533	--	--	--	--	--	--	--	--	--	--	--	-	-	-
Unigene000645	413	--	--	--	--	--	--	--	--	--	--	--	-	-	-
Unigene000646	318	--	--	--	--	--	--	--	--	--	--	--	-	-	-
Unigene000647	458	--	--	--	--	--	--	--	--	--	--	--	-	-	-
Unigene000648	261	--	--	--	--	--	--	--	--	--	--	--	-	-	-
Unigene000649	796	--	--	KVH90362.1	hypothetical protein Ccrd_007639 [Cynara cardunculus var. scolymus]	--	--	--	--	--	--	--	-	-	-
Unigene000650	488	--	--	--	--	--	--	--	--	--	--	--	-	-	-
Unigene000651	574	AT4G03390.2	STRUBBELIG-receptor family 3|Chr4:1490912-1494553 REVERSE LENGTH=776	XP_010278329.1	PREDICTED: protein STRUBBELIG-RECEPTOR FAMILY 3 isoform X3 [Nelumbo nucifera]	sp|Q6R2K3|SRF3_ARATH	Protein STRUBBELIG-RECEPTOR FAMILY 3 OS=Arabidopsis thaliana GN=SRF3 PE=2 SV=1	At1g11140	KOG1187	Serine/threonine protein kinase	--	--	-	-	-
Unigene000652	201	--	--	--	--	--	--	--	--	--	--	--	-	-	-
Unigene000653	210	--	--	--	--	--	--	--	--	--	--	--	-	-	-
Unigene000654	314	AT2G41700.1	ATP-binding cassette A1|Chr2:17383239-17396110 REVERSE LENGTH=1882	KVH94783.1	AAA+ ATPase domain-containing protein [Cynara cardunculus var. scolymus]	sp|Q84M24|AB1A_ARATH	ABC transporter A family member 1 OS=Arabidopsis thaliana GN=ABCA1 PE=2 SV=2	--	--	--	K05643//ATP-binding cassette, subfamily A (ABC1), member 3	pmum:103342398	-	-	-
Unigene000655	338	--	--	--	--	--	--	--	--	--	--	--	-	-	-
Unigene000656	662	--	--	--	--	--	--	--	--	--	--	--	-	-	-
Unigene000657	360	--	--	--	--	--	--	--	--	--	--	--	-	-	-
Unigene000658	238	AT4G14310.2	Transducin/WD40 repeat-like superfamily protein|Chr4:8237137-8240324 REVERSE LENGTH=920	KHG27907.1	Serine-threonine kinase receptor-associated [Gossypium arboreum]	--	--	--	--	--	--	--	-	-	-
Unigene000659	347	AT1G13040.2	Pentatricopeptide repeat (PPR-like) superfamily protein|Chr1:4447647-4449200 FORWARD LENGTH=517	XP_017227233.1	PREDICTED: pentatricopeptide repeat-containing protein At1g13040, mitochondrial isoform X3 [Daucus carota subsp. sativus]	sp|Q9SAD9|PPR40_ARATH	Pentatricopeptide repeat-containing protein At1g13040, mitochondrial OS=Arabidopsis thaliana GN=At1g13040 PE=2 SV=1	At1g13040	KOG4197	FOG: PPR repeat	--	--	-	-	-
Unigene000660	255	--	--	ACP30598.1	disease resistance protein [Brassica rapa subsp. pekinensis]	--	--	At2g06950	KOG0017	FOG: Transposon-encoded proteins with TYA, reverse transcriptase, integrase domains in various combinations	--	--	-	-	-
Unigene000661	243	--	--	--	--	--	--	--	--	--	--	--	-	-	-
Unigene000662	403	AT1G07390.5	receptor like protein 1|Chr1:2269764-2274654 FORWARD LENGTH=1048	KVI10574.1	Leucine-rich repeat-containing protein [Cynara cardunculus var. scolymus]	sp|Q9C9H7|RLP12_ARATH	Receptor-like protein 12 OS=Arabidopsis thaliana GN=RLP12 PE=2 SV=2	At1g07390	KOG0619	FOG: Leucine rich repeat	--	--	-	-	-
Unigene000663	335	--	--	--	--	--	--	--	--	--	--	--	-	-	-
Unigene000664	326	AT5G07280.1	Leucine-rich repeat transmembrane protein kinase|Chr5:2285088-2288666 FORWARD LENGTH=1192	KVI10154.1	Leucine-rich repeat-containing protein [Cynara cardunculus var. scolymus]	sp|Q9LYN8|EMS1_ARATH	Leucine-rich repeat receptor protein kinase EMS1 OS=Arabidopsis thaliana GN=EMS1 PE=1 SV=1	At2g26380	KOG0619	FOG: Leucine rich repeat	--	--	-	-	-
Unigene000665	375	--	--	--	--	--	--	--	--	--	--	--	-	-	-
Unigene000666	1449	AT5G50260.1	Cysteine proteinases superfamily protein|Chr5:20455605-20456862 FORWARD LENGTH=361	BAC75924.1	cysteine protease-2 [Helianthus annuus]	sp|Q9FGR9|CEP1_ARATH	KDEL-tailed cysteine endopeptidase CEP1 OS=Arabidopsis thaliana GN=CEP1 PE=1 SV=1	At5g50260	KOG1543	Cysteine proteinase Cathepsin L	K16292//KDEL-tailed cysteine endopeptidase [EC:3.4.22.-]	pop:POPTR_0015s09890g	-	-	-
Unigene000667	212	--	--	OMO61326.1	Integrase, catalytic core [Corchorus capsularis]	--	--	--	--	--	--	--	-	-	-
Unigene000668	211	AT5G23960.2	terpene synthase 21|Chr5:8092969-8095128 FORWARD LENGTH=545	KVH95545.1	Terpene synthase, metal-binding domain-containing protein [Cynara cardunculus var. scolymus]	sp|Q9FXY7|FARS_ARTAN	(E)-beta-farnesene synthase OS=Artemisia annua GN=CASC125 PE=1 SV=1	--	--	--	--	--	-	-	-
Unigene000669	474	--	--	--	--	--	--	--	--	--	--	--	-	-	-
Unigene000670	216	--	--	--	--	--	--	--	--	--	--	--	-	-	-
Unigene000671	287	--	--	--	--	--	--	--	--	--	--	--	-	-	-
Unigene000672	220	--	--	--	--	--	--	--	--	--	--	--	-	-	-
Unigene000673	305	--	--	--	--	--	--	--	--	--	--	--	-	-	-
Unigene000674	380	--	--	--	--	--	--	--	--	--	--	--	-	-	-
Unigene000675	212	--	--	--	--	--	--	--	--	--	--	--	-	-	-
Unigene000676	220	--	--	--	--	--	--	--	--	--	--	--	-	-	-
Unigene000677	486	--	--	--	--	--	--	--	--	--	--	--	-	-	-
Unigene000678	233	--	--	--	--	--	--	--	--	--	--	--	-	-	-
Unigene000679	436	--	--	--	--	--	--	--	--	--	--	--	-	-	-
Unigene000680	239	--	--	XP_016701286.1	PREDICTED: alpha-L-fucosidase 2-like isoform X1 [Gossypium hirsutum]	--	--	--	--	--	K15923//alpha-L-fucosidase 2 [EC:3.2.1.51]	bvg:104904928	-	GO:0003824//catalytic activity;GO:0004553//hydrolase activity, hydrolyzing O-glycosyl compounds;GO:0016787//hydrolase activity;GO:0015928//fucosidase activity;GO:0016798//hydrolase activity, acting on glycosyl bonds	-
Unigene000681	217	--	--	--	--	--	--	--	--	--	--	--	-	-	-
Unigene000682	355	--	--	--	--	--	--	--	--	--	--	--	-	-	-
Unigene000683	214	--	--	--	--	--	--	--	--	--	--	--	-	-	-
Unigene000684	1081	AT4G34590.1	G-box binding factor 6|Chr4:16522449-16522928 FORWARD LENGTH=159	KVI06536.1	Basic-leucine zipper domain-containing protein [Cynara cardunculus var. scolymus]	sp|Q9LZP8|BZP53_ARATH	bZIP transcription factor 53 OS=Arabidopsis thaliana GN=BZIP53 PE=1 SV=1	--	--	--	--	--	-	-	-
Unigene000685	239	--	--	--	--	--	--	--	--	--	--	--	-	-	-
Unigene000686	368	--	--	--	--	--	--	--	--	--	--	--	-	-	-
Unigene000687	245	--	--	--	--	--	--	--	--	--	--	--	-	-	-
Unigene000688	433	--	--	--	--	--	--	--	--	--	--	--	-	-	-
Unigene000689	311	--	--	--	--	--	--	--	--	--	--	--	-	-	-
Unigene000690	228	--	--	--	--	--	--	--	--	--	--	--	-	-	-
Unigene000691	286	--	--	--	--	--	--	--	--	--	--	--	-	-	-
Unigene000692	372	AT1G24290.1	AAA-type ATPase family protein|Chr1:8612650-8614227 REVERSE LENGTH=525	KVH99734.1	AAA+ ATPase domain-containing protein, partial [Cynara cardunculus var. scolymus]	sp|P45262|RARA_HAEIN	Replication-associated recombination protein A OS=Haemophilus influenzae (strain ATCC 51907 / DSM 11121 / KW20 / Rd) GN=rarA PE=3 SV=1	At1g24290	KOG2028	ATPase related to the helicase subunit of the Holliday junction resolvase	--	--	GO:0044238//primary metabolic process;GO:0044260//cellular macromolecule metabolic process;GO:0008152//metabolic process;GO:0046483//heterocycle metabolic process;GO:0009987//cellular process;GO:0071704//organic substance metabolic process;GO:0090304//nucleic acid metabolic process;GO:0044237//cellular metabolic process;GO:0006139//nucleobase-containing compound metabolic process;GO:0034641//cell…	GO:0032550//purine ribonucleoside binding;GO:0097367//carbohydrate derivative binding;GO:0001883//purine nucleoside binding;GO:0005488//binding;GO:0097159//organic cyclic compound binding;GO:0036094//small molecule binding;GO:0001882//nucleoside binding;GO:0032549//ribonucleoside binding;GO:1901363//heterocyclic compound binding	-
Unigene000693	734	AT1G64380.1	Integrase-type DNA-binding superfamily protein|Chr1:23890981-23891988 REVERSE LENGTH=335	KVH95344.1	AP2/ERF domain-containing protein, partial [Cynara cardunculus var. scolymus]	sp|Q9C7W2|ERF61_ARATH	Ethylene-responsive transcription factor ERF061 OS=Arabidopsis thaliana GN=ERF061 PE=2 SV=1	--	--	--	--	--	-	-	-
Unigene000694	207	--	--	--	--	--	--	--	--	--	--	--	-	-	-
Unigene000695	421	AT1G15510.1	Tetratricopeptide repeat (TPR)-like superfamily protein|Chr1:5329111-5331711 FORWARD LENGTH=866	XP_008461062.1	PREDICTED: pentatricopeptide repeat-containing protein At1g15510, chloroplastic [Cucumis melo]	sp|Q9M9E2|PPR45_ARATH	Pentatricopeptide repeat-containing protein At1g15510, chloroplastic OS=Arabidopsis thaliana GN=PCMP-H73 PE=3 SV=1	At1g15510	KOG4197	FOG: PPR repeat	--	--	-	-	-
Unigene000696	210	AT5G05610.2	alfin-like 1|Chr5:1677331-1678942 REVERSE LENGTH=241	XP_011035928.1	PREDICTED: PHD finger protein ALFIN-LIKE 2-like [Populus euphratica]// XP_011035929.1 PREDICTED: PHD finger protein ALFIN-LIKE 2-like [Populus euphratica]	sp|Q9FFF5|ALFL1_ARATH	PHD finger protein ALFIN-LIKE 1 OS=Arabidopsis thaliana GN=AL1 PE=1 SV=1	At5g05610	KOG1632	Uncharacterized PHD Zn-finger protein	--	--	-	GO:0043169//cation binding;GO:0046872//metal ion binding;GO:0043167//ion binding;GO:0005515//protein binding;GO:0005488//binding;GO:0046914//transition metal ion binding	-
Unigene000697	464	--	--	--	--	--	--	--	--	--	--	--	-	-	-
Unigene000698	590	--	--	KID82892.1	CHRD superfamily protein [Metarhizium guizhouense ARSEF 977]	--	--	--	--	--	--	--	-	-	-
Unigene000699	212	--	--	--	--	--	--	--	--	--	--	--	-	-	-
Unigene000700	223	--	--	GAV86549.1	UBN2 domain-containing protein [Cephalotus follicularis]	--	--	At2g06950	KOG0017	FOG: Transposon-encoded proteins with TYA, reverse transcriptase, integrase domains in various combinations	--	--	-	-	-
Unigene000701	221	AT4G23160.3	cysteine-rich RECEPTOR-like kinase|Chr4:12129485-12133157 FORWARD LENGTH=1043	JAU97790.1	Copia protein, partial [Noccaea caerulescens]	sp|P10978|POLX_TOBAC	Retrovirus-related Pol polyprotein from transposon TNT 1-94 OS=Nicotiana tabacum PE=2 SV=1	At1g34100_1	KOG0017	FOG: Transposon-encoded proteins with TYA, reverse transcriptase, integrase domains in various combinations	--	--	-	-	-
Unigene000702	216	--	--	--	--	--	--	--	--	--	--	--	-	-	-
Unigene000703	320	--	--	--	--	--	--	--	--	--	--	--	-	-	-
Unigene000704	1076	AT5G45060.2	Disease resistance protein (TIR-NBS-LRR class) family|Chr5:18182038-18186067 FORWARD LENGTH=1165	KVF30203.1	Leucine-rich repeat-containing protein [Cynara cardunculus var. scolymus]	--	--	--	--	--	--	--	-	-	-
Unigene000705	441	--	--	--	--	--	--	--	--	--	--	--	-	-	-
Unigene000706	435	AT5G04730.1	Ankyrin-repeat containing protein|Chr5:1364101-1367303 REVERSE LENGTH=603	XP_016679071.1	PREDICTED: ankyrin repeat-containing protein At3g12360-like [Gossypium hirsutum]	sp|Q9C7A2|Y3236_ARATH	Ankyrin repeat-containing protein At3g12360 OS=Arabidopsis thaliana GN=At3g12360 PE=2 SV=1	At5g04730	KOG0504	FOG: Ankyrin repeat	--	--	-	-	-
Unigene000707	505	--	--	--	--	--	--	--	--	--	--	--	-	-	-
Unigene000708	206	AT4G20270.1	Leucine-rich receptor-like protein kinase family protein|Chr4:10949822-10952924 FORWARD LENGTH=992	KVH88603.1	Leucine-rich repeat-containing protein [Cynara cardunculus var. scolymus]	sp|O65440|BAME3_ARATH	Leucine-rich repeat receptor-like serine/threonine-protein kinase BAM3 OS=Arabidopsis thaliana GN=BAM3 PE=2 SV=3	At5g25910	KOG0619	FOG: Leucine rich repeat	--	--	-	-	-
Unigene000709	221	--	--	--	--	--	--	--	--	--	--	--	-	-	-
Unigene000710	326	--	--	--	--	--	--	--	--	--	--	--	-	-	-
Unigene000711	1785	AT4G17970.1	aluminum-activated%2C malate transporter 12|Chr4:9975482-9977722 FORWARD LENGTH=560	KVH89729.1	Aluminum-activated malate transporter [Cynara cardunculus var. scolymus]	sp|O49696|ALMTC_ARATH	Aluminum-activated malate transporter 12 OS=Arabidopsis thaliana GN=ALMT12 PE=2 SV=1	At4g17970	KOG4711	Predicted membrane protein	--	--	-	-	GO:0016020//membrane;GO:0031224//intrinsic component of membrane;GO:0044425//membrane part
Unigene000712	248	--	--	--	--	--	--	--	--	--	--	--	-	-	-
Unigene000713	341	--	--	--	--	--	--	--	--	--	--	--	-	-	-
Unigene000714	466	--	--	--	--	--	--	--	--	--	--	--	-	-	-
Unigene000715	297	--	--	--	--	--	--	--	--	--	--	--	-	-	-
Unigene000716	609	--	--	--	--	--	--	--	--	--	--	--	-	-	-
Unigene000717	315	--	--	--	--	--	--	--	--	--	--	--	-	-	-
Unigene000718	348	--	--	--	--	--	--	--	--	--	--	--	-	-	-
Unigene000719	249	--	--	--	--	--	--	--	--	--	--	--	-	-	-
Unigene000720	411	--	--	--	--	--	--	--	--	--	--	--	-	-	-
Unigene000721	204	--	--	--	--	--	--	--	--	--	--	--	-	-	-
Unigene000722	348	--	--	--	--	--	--	--	--	--	--	--	-	-	-
Unigene000723	438	AT5G57260.1	cytochrome P450%2C family 71%2C subfamily B%2C polypeptide 10|Chr5:23198694-23200273 REVERSE LENGTH=502	G3GBK0.1	RecName: Full=Costunolide synthase; Short=CiCOS; AltName: Full=Cytochrome P450 71BL3// AEG79727.1 costunolide synthase [Cichorium intybus]	sp|G3GBK0|C7BL3_CICIN	Costunolide synthase OS=Cichorium intybus GN=CYP71BL3 PE=1 SV=1	At5g57260	KOG0156	Cytochrome P450 CYP2 subfamily	--	--	-	-	-
Unigene000724	332	--	--	--	--	--	--	--	--	--	--	--	-	-	-
Unigene000725	381	--	--	--	--	--	--	--	--	--	--	--	-	-	-
Unigene000726	239	--	--	--	--	--	--	--	--	--	--	--	-	-	-
Unigene000727	343	--	--	--	--	--	--	--	--	--	--	--	-	-	-
Unigene000728	201	--	--	--	--	--	--	--	--	--	--	--	-	-	-
Unigene000729	448	--	--	--	--	--	--	--	--	--	--	--	-	-	-
Unigene000730	205	--	--	--	--	--	--	--	--	--	--	--	-	-	-
Unigene000731	212	--	--	--	--	--	--	--	--	--	--	--	-	-	-
Unigene000732	551	--	--	--	--	--	--	--	--	--	--	--	-	-	-
Unigene000733	541	AT1G75590.1	SAUR-like auxin-responsive protein family|Chr1:28383250-28383714 REVERSE LENGTH=154	KVH96636.1	Auxin responsive SAUR protein [Cynara cardunculus var. scolymus]	sp|P33083|AX6B_SOYBN	Auxin-induced protein 6B OS=Glycine max PE=2 SV=1	--	--	--	K14488//SAUR family protein	pop:POPTR_0005s25820g	-	-	-
Unigene000734	218	--	--	--	--	--	--	--	--	--	--	--	-	-	-
Unigene000735	260	--	--	--	--	--	--	--	--	--	--	--	-	-	-
Unigene000736	210	--	--	--	--	--	--	--	--	--	--	--	-	-	-
Unigene000737	266	--	--	--	--	--	--	--	--	--	--	--	-	-	-
Unigene000738	309	--	--	--	--	--	--	--	--	--	--	--	-	-	-
Unigene000739	534	--	--	--	--	--	--	--	--	--	--	--	-	-	-
Unigene000740	625	--	--	--	--	--	--	--	--	--	--	--	-	-	-
Unigene000741	529	--	--	--	--	--	--	--	--	--	--	--	-	-	-
Unigene000742	210	--	--	--	--	--	--	--	--	--	--	--	-	-	-
Unigene000743	273	--	--	--	--	--	--	--	--	--	--	--	-	-	-
Unigene000744	340	AT1G77940.1	Ribosomal protein L7Ae/L30e/S12e/Gadd45 family protein|Chr1:29304116-29305288 REVERSE LENGTH=112	XP_003845742.1	similar to 60S ribosomal protein L30 [Leptosphaeria maculans JN3]// CBY02263.1 similar to 60S ribosomal protein L30 [Leptosphaeria maculans JN3]	sp|Q7S7F1|RL30_NEUCR	60S ribosomal protein L30 OS=Neurospora crassa (strain ATCC 24698 / 74-OR23-1A / CBS 708.71 / DSM 1257 / FGSC 987) GN=rpl-30 PE=3 SV=1	SPAC9G1.03c	KOG2988	60S ribosomal protein L30	K02908//large subunit ribosomal protein L30e	vcn:VOLCADRAFT_73734	GO:0044085//cellular component biogenesis;GO:0090304//nucleic acid metabolic process;GO:0046483//heterocycle metabolic process;GO:0000398//mRNA splicing, via spliceosome;GO:0006139//nucleobase-containing compound metabolic process;GO:0000375//RNA splicing, via transesterification reactions;GO:0044237//cellular metabolic process;GO:0043170//macromolecule metabolic process;GO:0008152//metabolic pro…	GO:0036002//pre-mRNA binding;GO:0005488//binding;GO:0003723//RNA binding;GO:0005198//structural molecule activity;GO:0003676//nucleic acid binding;GO:1901363//heterocyclic compound binding;GO:0097159//organic cyclic compound binding	GO:0044424//intracellular part;GO:0005622//intracellular;GO:0005623//cell;GO:0030529//intracellular ribonucleoprotein complex;GO:0044464//cell part;GO:1990904//ribonucleoprotein complex;GO:0032991//macromolecular complex
Unigene000745	242	--	--	XP_012050654.1	nucleolar protein 58 [Cryptococcus neoformans var. grubii H99]// AFR96297.1 nucleolar protein 58 [Cryptococcus neoformans var. grubii H99]	sp|Q4PBF2|NOP58_USTMA	Nucleolar protein 58 OS=Ustilago maydis (strain 521 / FGSC 9021) GN=NOP58 PE=3 SV=1	--	--	--	--	--	-	-	-
Unigene000746	215	--	--	--	--	--	--	--	--	--	--	--	-	-	-
Unigene000747	260	--	--	--	--	--	--	--	--	--	--	--	-	-	-
Unigene000748	252	--	--	--	--	--	--	--	--	--	--	--	-	-	-
Unigene000749	340	--	--	--	--	--	--	--	--	--	--	--	-	-	-
Unigene000750	2503	--	--	--	--	--	--	--	--	--	--	--	-	-	-
Unigene000751	379	--	--	XP_013445865.1	PIF1-like helicase [Medicago truncatula]// KEH19891.1 PIF1-like helicase [Medicago truncatula]	--	--	At1g52960	KOG0987	DNA helicase PIF1/RRM3	K15255//ATP-dependent DNA helicase PIF1 [EC:3.6.4.12]	mtr:MTR_3g049050	GO:0009987//cellular process	GO:0016817//hydrolase activity, acting on acid anhydrides;GO:0017111//nucleoside-triphosphatase activity;GO:0016462//pyrophosphatase activity;GO:0003824//catalytic activity;GO:0016787//hydrolase activity;GO:0004386//helicase activity;GO:0016818//hydrolase activity, acting on acid anhydrides, in phosphorus-containing anhydrides	-
Unigene000752	934	--	--	--	--	--	--	--	--	--	--	--	-	-	-
Unigene000753	206	--	--	--	--	--	--	--	--	--	--	--	-	-	-
Unigene000754	1231	AT4G23160.3	cysteine-rich RECEPTOR-like kinase|Chr4:12129485-12133157 FORWARD LENGTH=1043	KZV39334.1	retrovirus-related Pol polyprotein from transposon TNT 1-94 [Dorcoceras hygrometricum]	sp|P10978|POLX_TOBAC	Retrovirus-related Pol polyprotein from transposon TNT 1-94 OS=Nicotiana tabacum PE=2 SV=1	At3g60170	KOG0017	FOG: Transposon-encoded proteins with TYA, reverse transcriptase, integrase domains in various combinations	--	--	-	-	-
Unigene000755	749	AT4G15920.1	Nodulin MtN3 family protein|Chr4:9030742-9033343 REVERSE LENGTH=241	KVI01593.1	SWEET sugar transporter [Cynara cardunculus var. scolymus]	sp|Q84WN3|SWT17_ARATH	Bidirectional sugar transporter SWEET17 OS=Arabidopsis thaliana GN=SWEET17 PE=1 SV=2	At5g50800	KOG1623	Multitransmembrane protein	K15382//solute carrier family 50 (sugar transporter)	cit:102609435	GO:0051179//localization;GO:0051234//establishment of localization;GO:0044765//single-organism transport;GO:1902578//single-organism localization;GO:0044699//single-organism process;GO:0006810//transport	-	GO:0031224//intrinsic component of membrane;GO:0016020//membrane;GO:0044425//membrane part
Unigene000756	210	--	--	--	--	--	--	--	--	--	--	--	-	-	-
Unigene000757	303	--	--	--	--	--	--	--	--	--	--	--	-	-	-
Unigene000758	277	--	--	--	--	--	--	--	--	--	--	--	-	-	-
Unigene000759	281	--	--	--	--	--	--	--	--	--	--	--	-	-	-
Unigene000760	250	--	--	--	--	--	--	--	--	--	--	--	-	-	-
Unigene000761	364	--	--	--	--	--	--	--	--	--	--	--	-	-	-
Unigene000762	731	--	--	--	--	--	--	--	--	--	--	--	-	-	-
Unigene000763	343	--	--	--	--	--	--	--	--	--	--	--	-	-	-
Unigene000764	241	--	--	--	--	--	--	--	--	--	--	--	-	-	-
Unigene000765	374	--	--	--	--	--	--	--	--	--	--	--	-	-	-
Unigene000766	249	--	--	--	--	--	--	--	--	--	--	--	-	-	-
Unigene000767	326	--	--	OMO66823.1	Zinc finger, GRF-type [Corchorus olitorius]	--	--	--	--	--	--	--	-	-	-
Unigene000768	712	--	--	--	--	--	--	--	--	--	--	--	-	-	-
Unigene000769	609	--	--	--	--	--	--	--	--	--	--	--	-	-	-
Unigene000770	306	--	--	--	--	--	--	--	--	--	--	--	-	-	-
Unigene000771	383	--	--	--	--	--	--	--	--	--	--	--	-	-	-
Unigene000772	234	AT4G29510.1	arginine methyltransferase 11|Chr4:14491739-14493752 FORWARD LENGTH=390	XP_014184093.1	protein arginine n-methyltransferase [Trichosporon asahii var. asahii CBS 2479]// EJT52753.1 protein arginine n-methyltransferase [Trichosporon asahii var. asahii CBS 2479]	sp|P38074|HMT1_YEAST	Protein arginine N-methyltransferase 1 OS=Saccharomyces cerevisiae (strain ATCC 204508 / S288c) GN=HMT1 PE=1 SV=1	YBR034c	KOG1499	Protein arginine N-methyltransferase PRMT1 and related enzymes	K11434//protein arginine N-methyltransferase 1 [EC:2.1.1.-]	cit:102619098	GO:0016070//RNA metabolic process;GO:0043414//macromolecule methylation;GO:0044238//primary metabolic process;GO:0018193//peptidyl-amino acid modification;GO:0044271//cellular nitrogen compound biosynthetic process;GO:0032774//RNA biosynthetic process;GO:1901362//organic cyclic compound biosynthetic process;GO:0090304//nucleic acid metabolic process;GO:0044237//cellular metabolic process;GO:00181…	GO:0003824//catalytic activity;GO:0008170//N-methyltransferase activity;GO:0008168//methyltransferase activity;GO:0016740//transferase activity;GO:0016274//protein-arginine N-methyltransferase activity;GO:0008757//S-adenosylmethionine-dependent methyltransferase activity;GO:0016273//arginine N-methyltransferase activity;GO:0008276//protein methyltransferase activity;GO:0016741//transferase activi…	-
Unigene000773	650	AT5G56550.1	oxidative stress 3|Chr5:22895847-22896502 REVERSE LENGTH=172	KZV48001.1	Oxidative stress 3 isoform 1, partial [Dorcoceras hygrometricum]	--	--	At5g56550	KOG4210	Nuclear localization sequence binding protein	--	--	-	-	-
Unigene000774	217	--	--	--	--	--	--	--	--	--	--	--	-	-	-
Unigene000775	434	--	--	--	--	--	--	--	--	--	--	--	-	-	-
Unigene000776	269	--	--	--	--	--	--	--	--	--	--	--	-	-	-
Unigene000777	207	--	--	--	--	--	--	--	--	--	--	--	-	-	-
Unigene000778	514	ATCG00050.1	ribosomal protein S16|ChrC:5084-6188 REVERSE LENGTH=79	YP_398311.1	ribosomal protein S16 [Lactuca sativa]// Q332Z6.1 RecName: Full=30S ribosomal protein S16, chloroplastic// BAE47576.1 ribosomal protein S16 (chloroplast) [Lactuca sativa]// ABD47215.2 ribosomal protein S16 (chloroplast) [Lactuca sativa]	sp|Q332Z6|RR16_LACSA	30S ribosomal protein S16, chloroplastic OS=Lactuca sativa GN=rps16 PE=3 SV=1	AtCh005	KOG3419	Mitochondrial/chloroplast ribosomal protein S16	K02959//small subunit ribosomal protein S16	tcc:ThcaC_p003	GO:0008152//metabolic process;GO:0071704//organic substance metabolic process;GO:0043170//macromolecule metabolic process;GO:0010467//gene expression	GO:0005198//structural molecule activity	GO:0030529//intracellular ribonucleoprotein complex;GO:0043227//membrane-bounded organelle;GO:0043226//organelle;GO:0044464//cell part;GO:0043231//intracellular membrane-bounded organelle;GO:1990904//ribonucleoprotein complex;GO:0043229//intracellular organelle;GO:0005737//cytoplasm;GO:0005623//cell;GO:0044424//intracellular part;GO:0005622//intracellular;GO:0032991//macromolecular complex;GO:004…
Unigene000779	1366	ATCG00050.1	ribosomal protein S16|ChrC:5084-6188 REVERSE LENGTH=79	YP_398311.1	ribosomal protein S16 [Lactuca sativa]// Q332Z6.1 RecName: Full=30S ribosomal protein S16, chloroplastic// BAE47576.1 ribosomal protein S16 (chloroplast) [Lactuca sativa]// ABD47215.2 ribosomal protein S16 (chloroplast) [Lactuca sativa]	sp|Q332Z6|RR16_LACSA	30S ribosomal protein S16, chloroplastic OS=Lactuca sativa GN=rps16 PE=3 SV=1	AtCh005	KOG3419	Mitochondrial/chloroplast ribosomal protein S16	K02959//small subunit ribosomal protein S16	tcc:ThcaC_p003	GO:0008152//metabolic process;GO:0010467//gene expression;GO:0043170//macromolecule metabolic process;GO:0071704//organic substance metabolic process	-	GO:0043229//intracellular organelle;GO:0043231//intracellular membrane-bounded organelle;GO:0043226//organelle;GO:0005737//cytoplasm;GO:0044424//intracellular part;GO:0005623//cell;GO:0005622//intracellular;GO:0030529//intracellular ribonucleoprotein complex;GO:0044444//cytoplasmic part;GO:0043227//membrane-bounded organelle;GO:0032991//macromolecular complex;GO:1990904//ribonucleoprotein complex…
Unigene000780	290	--	--	--	--	--	--	--	--	--	--	--	-	-	-
Unigene000781	1327	AT1G43760.1	DNAse I-like superfamily protein|Chr1:16528880-16531065 REVERSE LENGTH=626	KHN27546.1	LINE-1 reverse transcriptase like, partial [Glycine soja]	sp|P14381|YTX2_XENLA	Transposon TX1 uncharacterized 149 kDa protein OS=Xenopus laevis PE=3 SV=1	At3g32110	KOG1075	FOG: Reverse transcriptase	--	--	-	-	-
Unigene000782	267	--	--	--	--	--	--	--	--	--	--	--	-	-	-
Unigene000783	214	--	--	KVI00506.1	hypothetical protein Ccrd_021244 [Cynara cardunculus var. scolymus]	--	--	--	--	--	--	--	-	-	-
Unigene000784	1554	--	--	KYP34729.1	Retrovirus-related Pol polyprotein from transposon TNT 1-94, partial [Cajanus cajan]	--	--	At1g62460	KOG0017	FOG: Transposon-encoded proteins with TYA, reverse transcriptase, integrase domains in various combinations	--	--	-	-	-
Unigene000785	299	--	--	--	--	--	--	--	--	--	--	--	-	-	-
Unigene000786	416	--	--	--	--	--	--	--	--	--	--	--	-	-	-
Unigene000787	223	--	--	--	--	--	--	--	--	--	--	--	-	-	-
Unigene000788	411	AT3G46830.2	RAB GTPase homolog A2C|Chr3:17246699-17248362 REVERSE LENGTH=217	OEL25018.1	Ras-related protein Rab11C, partial [Dichanthelium oligosanthes]	sp|Q40193|RB11C_LOTJA	Ras-related protein Rab11C OS=Lotus japonicus GN=RAB11C PE=2 SV=1	At1g07410	KOG0087	GTPase Rab11/YPT3, small G protein superfamily	K07904//Ras-related protein Rab-11A	obr:102713810	GO:0035556//intracellular signal transduction;GO:0044700//single organism signaling;GO:0009987//cellular process;GO:0050794//regulation of cellular process;GO:0023052//signaling;GO:0051716//cellular response to stimulus;GO:0050896//response to stimulus;GO:0044763//single-organism cellular process;GO:0007165//signal transduction;GO:0065007//biological regulation;GO:0050789//regulation of biologica…	-	GO:0044464//cell part;GO:0005623//cell
Unigene000789	402	--	--	--	--	--	--	--	--	--	--	--	-	-	-
Unigene000790	266	AT3G42170.2	BED zinc finger and hAT dimerization domain-containing protein DAYSLEEPER|Chr3:14321838-14323928 FORWARD LENGTH=674	XP_010654811.1	PREDICTED: zinc finger BED domain-containing protein DAYSLEEPER-like [Vitis vinifera]	sp|Q9M2N5|DSLE_ARATH	Zinc finger BED domain-containing protein DAYSLEEPER OS=Arabidopsis thaliana GN=HAT PE=1 SV=1	At3g42170	KOG1121	Tam3-transposase (Ac family)	--	--	-	-	-
Unigene000791	544	--	--	--	--	--	--	--	--	--	--	--	-	-	-
Unigene000792	220	--	--	--	--	--	--	--	--	--	--	--	-	-	-
Unigene000793	212	--	--	--	--	--	--	--	--	--	--	--	-	-	-
Unigene000794	855	--	--	--	--	--	--	--	--	--	--	--	-	-	-
Unigene000795	489	--	--	--	--	--	--	--	--	--	--	--	-	-	-
Unigene000796	455	AT5G60720.1	electron transporter%2C putative (Protein of unknown function%2C DUF547)|Chr5:24418436-24422177 REVERSE LENGTH=691	KHG25866.1	Topoisomerase 1-associated factor 1 [Gossypium arboreum]	--	--	--	--	--	--	--	-	-	-
Unigene000797	590	--	--	--	--	--	--	--	--	--	--	--	-	-	-
Unigene000798	664	--	--	--	--	--	--	--	--	--	--	--	-	-	-
Unigene000799	377	--	--	--	--	--	--	--	--	--	--	--	-	-	-
Unigene000800	577	--	--	--	--	--	--	--	--	--	--	--	-	-	-
Unigene000801	443	--	--	--	--	--	--	--	--	--	--	--	-	-	-
Unigene000802	470	--	--	--	--	--	--	--	--	--	--	--	-	-	-
Unigene000803	401	--	--	--	--	--	--	--	--	--	--	--	-	-	-
Unigene000804	662	--	--	KVI09532.1	cytochrome P450 [Cynara cardunculus var. scolymus]	--	--	--	--	--	--	--	-	-	-
Unigene000805	349	AT4G10840.1	Tetratricopeptide repeat (TPR)-like superfamily protein|Chr4:6656614-6659033 FORWARD LENGTH=609	XP_009615358.1	PREDICTED: nephrocystin-3 [Nicotiana tomentosiformis]	--	--	At4g10840	KOG1840	Kinesin light chain	--	--	-	-	-
Unigene000806	251	--	--	--	--	--	--	--	--	--	--	--	-	-	-
Unigene000807	931	--	--	KID80857.1	CAP domain protein [Metarhizium guizhouense ARSEF 977]// KID81247.1 CAP domain protein [Metarhizium guizhouense ARSEF 977]	--	--	--	--	--	--	--	-	-	-
Unigene000808	207	--	--	--	--	sp|P06454|PTMA_HUMAN	Prothymosin alpha OS=Homo sapiens GN=PTMA PE=1 SV=2	--	--	--	--	--	-	-	-
Unigene000809	782	--	--	--	--	--	--	--	--	--	--	--	-	-	-
Unigene000810	242	--	--	--	--	--	--	--	--	--	--	--	-	-	-
Unigene000811	238	--	--	--	--	--	--	--	--	--	--	--	-	-	-
Unigene000812	333	--	--	--	--	--	--	--	--	--	--	--	-	-	-
Unigene000813	520	--	--	--	--	--	--	--	--	--	--	--	-	-	-
Unigene000814	346	--	--	XP_010104920.1	Transposon Ty3-I Gag-Pol polyprotein [Morus notabilis]// EXC02267.1 Transposon Ty3-I Gag-Pol polyprotein [Morus notabilis]	sp|P20825|POL2_DROME	Retrovirus-related Pol polyprotein from transposon 297 OS=Drosophila melanogaster GN=pol PE=3 SV=1	At3g11970_2	KOG0017	FOG: Transposon-encoded proteins with TYA, reverse transcriptase, integrase domains in various combinations	--	--	-	-	-
Unigene000815	697	--	--	--	--	--	--	--	--	--	--	--	-	-	-
Unigene000816	1730	--	--	KYP43751.1	Retrovirus-related Pol polyprotein from transposon TNT 1-94, partial [Cajanus cajan]	sp|P10978|POLX_TOBAC	Retrovirus-related Pol polyprotein from transposon TNT 1-94 OS=Nicotiana tabacum PE=2 SV=1	At1g31210	KOG0017	FOG: Transposon-encoded proteins with TYA, reverse transcriptase, integrase domains in various combinations	--	--	-	-	-
Unigene000817	767	--	--	--	--	--	--	--	--	--	--	--	-	-	-
Unigene000818	216	--	--	--	--	--	--	--	--	--	--	--	-	-	-
Unigene000819	297	--	--	--	--	--	--	--	--	--	--	--	-	-	-
Unigene000820	606	AT3G25070.2	RPM1 interacting protein 4|Chr3:9132891-9133747 FORWARD LENGTH=224	KVH96887.1	Pathogenic type III effector avirulence factor Avr cleavage site-containing protein [Cynara cardunculus var. scolymus]	sp|Q8GYN5|RIN4_ARATH	RPM1-interacting protein 4 OS=Arabidopsis thaliana GN=RIN4 PE=1 SV=1	--	--	--	K13456//RPM1-interacting protein 4	sly:101250267	-	-	-
Unigene000821	253	--	--	KVI05226.1	F-box domain, cyclin-like protein [Cynara cardunculus var. scolymus]	--	--	--	--	--	--	--	-	-	-
Unigene000822	413	AT2G42920.2	Pentatricopeptide repeat (PPR-like) superfamily protein|Chr2:17858705-17860384 FORWARD LENGTH=559	KVI06906.1	Pentatricopeptide repeat-containing protein [Cynara cardunculus var. scolymus]	sp|Q9SJG6|PP200_ARATH	Pentatricopeptide repeat-containing protein At2g42920, chloroplastic OS=Arabidopsis thaliana GN=PCMP-E75 PE=2 SV=1	At2g42920	KOG4197	FOG: PPR repeat	--	--	-	-	-
Unigene000823	241	--	--	--	--	--	--	--	--	--	--	--	-	-	-
Unigene000824	265	--	--	--	--	--	--	--	--	--	--	--	-	-	-
Unigene000825	282	--	--	--	--	--	--	--	--	--	--	--	-	-	-
Unigene000826	253	--	--	KVH93345.1	hypothetical protein Ccrd_004591, partial [Cynara cardunculus var. scolymus]	--	--	--	--	--	--	--	-	-	-
Unigene000827	286	--	--	--	--	--	--	--	--	--	--	--	-	-	-
Unigene000828	257	AT2G17500.4	Auxin efflux carrier family protein|Chr2:7607063-7608990 FORWARD LENGTH=396	KVI02964.1	Auxin efflux carrier [Cynara cardunculus var. scolymus]	sp|Q9SHL8|PILS5_ARATH	Protein PIN-LIKES 5 OS=Arabidopsis thaliana GN=PILS5 PE=2 SV=1	At2g17500	KOG2722	Predicted membrane protein	--	--	-	-	-
Unigene000829	807	AT1G48130.1	1-cysteine peroxiredoxin 1|Chr1:17780610-17781500 FORWARD LENGTH=216	XP_018629591.1	PREDICTED: 1-Cys peroxiredoxin [Nicotiana tomentosiformis]	sp|Q6E2Z6|REHY_MEDTR	1-Cys peroxiredoxin OS=Medicago truncatula PE=2 SV=1	At1g48130	KOG0854	Alkyl hydroperoxide reductase, thiol specific antioxidant and related enzymes	K11188//peroxiredoxin 6, 1-Cys peroxiredoxin [EC:1.11.1.7 1.11.1.15 3.1.1.-]	vvi:100259564	-	-	-
Unigene000830	841	AT1G48130.1	1-cysteine peroxiredoxin 1|Chr1:17780610-17781500 FORWARD LENGTH=216	XP_018629591.1	PREDICTED: 1-Cys peroxiredoxin [Nicotiana tomentosiformis]	sp|Q6E2Z6|REHY_MEDTR	1-Cys peroxiredoxin OS=Medicago truncatula PE=2 SV=1	At1g48130	KOG0854	Alkyl hydroperoxide reductase, thiol specific antioxidant and related enzymes	K11188//peroxiredoxin 6, 1-Cys peroxiredoxin [EC:1.11.1.7 1.11.1.15 3.1.1.-]	vvi:100259564	-	-	-
Unigene000831	218	AT3G11130.1	Clathrin%2C heavy chain|Chr3:3482575-3491667 REVERSE LENGTH=1705	XP_019092640.1	PREDICTED: clathrin heavy chain 1-like [Camelina sativa]// XP_019092641.1 PREDICTED: clathrin heavy chain 1-like [Camelina sativa]	sp|Q0WNJ6|CLAH1_ARATH	Clathrin heavy chain 1 OS=Arabidopsis thaliana GN=CHC1 PE=1 SV=1	At3g08530	KOG0985	Vesicle coat protein clathrin, heavy chain	K04646//clathrin heavy chain	tcc:TCM_042168	-	-	-
Unigene000832	538	--	--	--	--	--	--	--	--	--	--	--	-	-	-
Unigene000833	365	--	--	--	--	--	--	--	--	--	--	--	-	-	-
Unigene000834	322	--	--	--	--	--	--	--	--	--	--	--	-	-	-
Unigene000835	353	--	--	--	--	--	--	--	--	--	--	--	-	-	-
Unigene000836	361	--	--	KVI09532.1	cytochrome P450 [Cynara cardunculus var. scolymus]	--	--	--	--	--	--	--	-	-	-
Unigene000837	883	AT2G02520.1	RNA-directed DNA polymerase (reverse transcriptase)-related family protein|Chr2:676771-678145 REVERSE LENGTH=211	XP_020249193.1	uncharacterized protein LOC109826575 [Asparagus officinalis]	--	--	At2g02520	KOG1075	FOG: Reverse transcriptase	--	--	-	-	-
Unigene000838	438	--	--	--	--	--	--	--	--	--	--	--	-	-	-
Unigene000839	235	--	--	--	--	--	--	--	--	--	--	--	-	-	-
Unigene000840	397	--	--	KEQ87197.1	PH domain-containing protein [Aureobasidium pullulans EXF-150]	sp|O94447|SLM1_SCHPO	Cytoskeletal signaling protein slm1 OS=Schizosaccharomyces pombe (strain 972 / ATCC 24843) GN=slm1 PE=1 SV=1	--	--	--	--	--	-	-	-
Unigene000841	216	--	--	--	--	--	--	--	--	--	--	--	-	-	-
Unigene000842	206	--	--	--	--	--	--	--	--	--	--	--	-	-	-
Unigene000843	271	--	--	--	--	--	--	--	--	--	--	--	-	-	-
Unigene000844	252	--	--	--	--	--	--	--	--	--	--	--	-	-	-
Unigene000845	814	AT5G39320.1	UDP-glucose 6-dehydrogenase family protein|Chr5:15743254-15744696 FORWARD LENGTH=480	KVH96190.1	6-phosphogluconate dehydrogenase, C-terminal-like protein [Cynara cardunculus var. scolymus]	sp|Q9AUV6|UGDH3_ORYSJ	UDP-glucose 6-dehydrogenase 3 OS=Oryza sativa subsp. japonica GN=UGD3 PE=2 SV=1	At5g39320	KOG2666	UDP-glucose/GDP-mannose dehydrogenase	K00012//UDPglucose 6-dehydrogenase [EC:1.1.1.22]	tcc:TCM_011574	GO:1901360//organic cyclic compound metabolic process;GO:0044710//single-organism metabolic process;GO:1901137//carbohydrate derivative biosynthetic process;GO:0034641//cellular nitrogen compound metabolic process;GO:0044271//cellular nitrogen compound biosynthetic process;GO:0071704//organic substance metabolic process;GO:0019438//aromatic compound biosynthetic process;GO:0044699//single-organis…	GO:0003824//catalytic activity;GO:0036094//small molecule binding;GO:0016491//oxidoreductase activity;GO:0097159//organic cyclic compound binding;GO:0000166//nucleotide binding;GO:1901265//nucleoside phosphate binding;GO:0005488//binding;GO:1901363//heterocyclic compound binding;GO:0016614//oxidoreductase activity, acting on CH-OH group of donors	-
Unigene000846	815	AT3G29360.2	UDP-glucose 6-dehydrogenase family protein|Chr3:11267375-11268817 REVERSE LENGTH=480	KVH96190.1	6-phosphogluconate dehydrogenase, C-terminal-like protein [Cynara cardunculus var. scolymus]	sp|Q9LIA8|UGDH2_ARATH	UDP-glucose 6-dehydrogenase 2 OS=Arabidopsis thaliana GN=UGD2 PE=1 SV=1	At3g29360	KOG2666	UDP-glucose/GDP-mannose dehydrogenase	K00012//UDPglucose 6-dehydrogenase [EC:1.1.1.22]	sly:101263958	-	-	-
Unigene000847	234	--	--	--	--	--	--	--	--	--	--	--	-	-	-
Unigene000848	2487	AT4G03500.1	Ankyrin repeat family protein|Chr4:1553453-1556571 FORWARD LENGTH=652	XP_010650496.1	PREDICTED: protein ACCELERATED CELL DEATH 6 [Vitis vinifera]	sp|Q9C7A2|Y3236_ARATH	Ankyrin repeat-containing protein At3g12360 OS=Arabidopsis thaliana GN=At3g12360 PE=2 SV=1	At4g03500	KOG0504	FOG: Ankyrin repeat	--	--	-	-	-
Unigene000849	319	--	--	--	--	--	--	--	--	--	--	--	-	-	-
Unigene000850	420	--	--	--	--	--	--	--	--	--	--	--	-	-	-
Unigene000851	218	--	--	--	--	--	--	--	--	--	--	--	-	-	-
Unigene000852	1987	--	--	--	--	--	--	--	--	--	--	--	-	-	-
Unigene000853	438	--	--	--	--	--	--	--	--	--	--	--	-	-	-
Unigene000854	644	--	--	EOX94092.1	Gag protease polyprotein [Theobroma cacao]	sp|Q7LHG5|YI31B_YEAST	Transposon Ty3-I Gag-Pol polyprotein OS=Saccharomyces cerevisiae (strain ATCC 204508 / S288c) GN=TY3B-I PE=3 SV=2	At2g07660	KOG0017	FOG: Transposon-encoded proteins with TYA, reverse transcriptase, integrase domains in various combinations	--	--	GO:0034641//cellular nitrogen compound metabolic process;GO:0008152//metabolic process;GO:0044260//cellular macromolecule metabolic process;GO:0044238//primary metabolic process;GO:0090304//nucleic acid metabolic process;GO:0071704//organic substance metabolic process;GO:0006725//cellular aromatic compound metabolic process;GO:0009987//cellular process;GO:1901360//organic cyclic compound metaboli…	GO:0043167//ion binding;GO:0043169//cation binding;GO:0016787//hydrolase activity;GO:0003824//catalytic activity;GO:0005488//binding;GO:0046872//metal ion binding	-
Unigene000855	488	--	--	AAO45752.1	pol protein [Cucumis melo subsp. melo]	sp|P04323|POL3_DROME	Retrovirus-related Pol polyprotein from transposon 17.6 OS=Drosophila melanogaster GN=pol PE=3 SV=1	At2g14650	KOG0017	FOG: Transposon-encoded proteins with TYA, reverse transcriptase, integrase domains in various combinations	--	--	-	GO:0046914//transition metal ion binding;GO:0043169//cation binding;GO:0005488//binding;GO:0043167//ion binding;GO:0046872//metal ion binding	-
Unigene000856	281	--	--	--	--	--	--	--	--	--	--	--	-	-	-
Unigene000857	288	--	--	--	--	--	--	--	--	--	--	--	-	-	-
Unigene000858	486	--	--	--	--	--	--	--	--	--	--	--	-	-	-
Unigene000859	380	--	--	--	--	--	--	--	--	--	--	--	-	-	-
Unigene000860	431	--	--	--	--	--	--	--	--	--	--	--	-	-	-
Unigene000861	326	--	--	JAV45135.1	cysteine-rich RLK RECEPTOR-like protein kinase [Citrus limon]	--	--	At1g36620	KOG0017	FOG: Transposon-encoded proteins with TYA, reverse transcriptase, integrase domains in various combinations	--	--	-	-	-
Unigene000862	603	--	--	--	--	--	--	--	--	--	--	--	-	-	-
Unigene000863	931	--	--	--	--	--	--	--	--	--	--	--	-	-	-
Unigene000864	456	--	--	--	--	--	--	--	--	--	--	--	-	-	-
Unigene000865	405	--	--	--	--	--	--	--	--	--	--	--	-	-	-
Unigene000866	616	AT1G74240.2	Mitochondrial substrate carrier family protein|Chr1:27917843-27919987 FORWARD LENGTH=316	XP_001829210.2	mitochondrial inner membrane protein [Coprinopsis cinerea okayama7#130]// EAU92536.2 mitochondrial inner membrane protein [Coprinopsis cinerea okayama7#130]	sp|Q9VA73|CMC_DROME	Calcium-binding mitochondrial carrier protein Aralar1 OS=Drosophila melanogaster GN=aralar1 PE=2 SV=1	7301942	KOG0751	Mitochondrial aspartate/glutamate carrier protein Aralar/Citrin (contains EF-hand Ca2+-binding domains)	K15105//solute carrier family 25 (mitochondrial aspartate/glutamate transporter), member 12/13	cme:CYME_CMA005C	GO:0051234//establishment of localization;GO:0051179//localization	-	GO:0016020//membrane
Unigene000867	417	AT2G14095.1	hypothetical protein|Chr2:5932506-5933752 REVERSE LENGTH=234	CDX89624.1	BnaC03g45380D [Brassica napus]	--	--	--	--	--	--	--	-	-	-
Unigene000868	532	--	--	--	--	--	--	--	--	--	--	--	-	-	-
Unigene000869	652	--	--	--	--	--	--	--	--	--	--	--	-	-	-
Unigene000870	264	--	--	--	--	--	--	--	--	--	--	--	-	-	-
Unigene000871	298	--	--	--	--	--	--	--	--	--	--	--	-	-	-
Unigene000872	960	--	--	BAK64102.1	gag-pol polyprotein [Eustoma exaltatum subsp. russellianum]	--	--	At2g07010	KOG0017	FOG: Transposon-encoded proteins with TYA, reverse transcriptase, integrase domains in various combinations	--	--	-	-	-
Unigene000873	251	AT5G42650.1	allene oxide synthase|Chr5:17097803-17099359 REVERSE LENGTH=518	Q40778.2	RecName: Full=Allene oxide synthase; AltName: Full=Cytochrome P450 74A2; AltName: Full=Rubber particle protein; Short=RPP// 3DAM_A Chain A, Crystal Structure Of Allene Oxide Synthase// 3DAN_A Chain A, Crystal Structure Of Allene Oxide Synthase// 3DBM_A Chain A, Crystal Structure Of Allene Oxide Synthase// CAA55025.2 rubber particle protein [Parthenium argentatum]	sp|Q40778|C74A2_PARAR	Allene oxide synthase OS=Parthenium argentatum GN=CYP74A2 PE=1 SV=2	--	--	--	K01723//hydroperoxide dehydratase [EC:4.2.1.92]	brp:103848557	-	-	-
Unigene000874	322	--	--	KYP43087.1	Retrovirus-related Pol polyprotein from transposon TNT 1-94 [Cajanus cajan]	--	--	--	--	--	K12604//CCR4-NOT transcription complex subunit 1	vvi:100259605	-	-	-
Unigene000875	773	--	--	--	--	--	--	--	--	--	--	--	-	-	-
Unigene000876	471	--	--	--	--	--	--	--	--	--	--	--	-	-	-
Unigene000877	390	AT1G77510.1	PDI-like 1-2|Chr1:29126742-29129433 FORWARD LENGTH=508	KVH99627.1	disulfide isomerase [Cynara cardunculus var. scolymus]	sp|Q9XF61|PDI_DATGL	Protein disulfide-isomerase OS=Datisca glomerata GN=PDI PE=2 SV=1	At1g77510	KOG0190	Protein disulfide isomerase (prolyl 4-hydroxylase beta subunit)	K09580//protein disulfide-isomerase A1 [EC:5.3.4.1]	vvi:100259138	-	-	-
Unigene000878	344	--	--	--	--	--	--	--	--	--	--	--	-	-	-
Unigene000879	610	AT1G64100.3	pentatricopeptide (PPR) repeat-containing protein|Chr1:23791585-23793641 FORWARD LENGTH=666	KVH91263.1	Pentatricopeptide repeat-containing protein [Cynara cardunculus var. scolymus]	sp|Q6NQ83|PP247_ARATH	Pentatricopeptide repeat-containing protein At3g22470, mitochondrial OS=Arabidopsis thaliana GN=At3g22470 PE=2 SV=1	At3g22470	KOG4197	FOG: PPR repeat	--	--	-	-	-
Unigene000880	397	--	--	GAV59442.1	Myb_DNA-bind_3 domain-containing protein [Cephalotus follicularis]	--	--	--	--	--	--	--	-	-	-
Unigene000881	693	AT2G43310.1	Ribosomal L18p/L5e family protein|Chr2:17996106-17996507 FORWARD LENGTH=133	EOY04895.1	Ribosomal L18p/L5e family protein [Theobroma cacao]	--	--	--	--	--	--	--	-	-	-
Unigene000882	290	--	--	--	--	--	--	--	--	--	--	--	-	-	-
Unigene000883	1621	AT2G22590.1	UDP-Glycosyltransferase superfamily protein|Chr2:9593012-9594424 FORWARD LENGTH=470	XP_019262060.1	PREDICTED: UDP-glycosyltransferase 91A1-like [Nicotiana attenuata]// OIT38067.1 udp-glycosyltransferase 91a1 [Nicotiana attenuata]	sp|Q940V3|U91A1_ARATH	UDP-glycosyltransferase 91A1 OS=Arabidopsis thaliana GN=UGT91A1 PE=2 SV=1	At2g22590	KOG1192	UDP-glucuronosyl and UDP-glucosyl transferase	--	--	-	-	-
Unigene000884	226	--	--	KHN26160.1	MADS-box transcription factor ANR1 [Glycine soja]	sp|P0CT40|TF29_SCHPO	Transposon Tf2-9 polyprotein OS=Schizosaccharomyces pombe (strain 972 / ATCC 24843) GN=Tf2-9 PE=3 SV=1	At1g36590_2	KOG0017	FOG: Transposon-encoded proteins with TYA, reverse transcriptase, integrase domains in various combinations	--	--	-	-	-
Unigene000885	270	--	--	APU66352.1	late embryogenesis abundant protein group 3 protein [Oryza nivara]	sp|P0C5A4|LEA3_ORYSJ	Late embryogenesis abundant protein, group 3 OS=Oryza sativa subsp. japonica GN=LEA3 PE=2 SV=1	At3g15670	KOG4744	Uncharacterized conserved protein	--	--	-	-	-
Unigene000886	237	--	--	--	--	--	--	--	--	--	--	--	-	-	-
Unigene000887	558	--	--	--	--	--	--	--	--	--	--	--	-	-	-
Unigene000888	1710	--	--	--	--	--	--	--	--	--	--	--	-	-	-
Unigene000889	1033	--	--	--	--	--	--	--	--	--	--	--	-	-	-
Unigene000890	290	--	--	--	--	--	--	--	--	--	--	--	-	-	-
Unigene000891	256	--	--	--	--	--	--	--	--	--	--	--	-	-	-
Unigene000892	339	--	--	--	--	--	--	--	--	--	--	--	-	-	-
Unigene000893	493	AT3G07130.1	purple acid phosphatase 15|Chr3:2255763-2257981 REVERSE LENGTH=532	XP_011041900.1	PREDICTED: purple acid phosphatase 15-like isoform X1 [Populus euphratica]// XP_011041905.1 PREDICTED: purple acid phosphatase 15-like isoform X1 [Populus euphratica]	sp|Q9SFU3|PPA15_ARATH	Purple acid phosphatase 15 OS=Arabidopsis thaliana GN=PAP15 PE=1 SV=1	At3g07130	KOG1378	Purple acid phosphatase	--	--	-	-	-
Unigene000894	220	--	--	--	--	--	--	--	--	--	--	--	-	-	-
Unigene000895	345	--	--	--	--	--	--	--	--	--	--	--	-	-	-
Unigene000896	373	--	--	--	--	--	--	--	--	--	--	--	-	-	-
Unigene000897	246	--	--	--	--	--	--	--	--	--	--	--	-	-	-
Unigene000898	468	--	--	EOY04976.1	Inositol transporter 1 isoform 2 [Theobroma cacao]	--	--	--	--	--	K08150//MFS transporter, SP family, solute carrier family 2 (myo-inositol transporter), member 13	tcc:TCM_020108	GO:0044763//single-organism cellular process;GO:0051179//localization;GO:0009987//cellular process;GO:0051234//establishment of localization;GO:0044699//single-organism process	GO:0022857//transmembrane transporter activity;GO:0005215//transporter activity	GO:0016020//membrane;GO:0044425//membrane part;GO:0031224//intrinsic component of membrane
Unigene000899	255	--	--	--	--	--	--	--	--	--	--	--	-	-	-
Unigene000900	836	ATMG00810.1	DNA/RNA polymerases superfamily protein|ChrM:227709-228431 REVERSE LENGTH=240	XP_017696536.1	PREDICTED: uncharacterized mitochondrial protein AtMg00810-like [Phoenix dactylifera]	sp|P92519|M810_ARATH	Uncharacterized mitochondrial protein AtMg00810 OS=Arabidopsis thaliana GN=AtMg00810 PE=4 SV=1	At4g10990_1	KOG0017	FOG: Transposon-encoded proteins with TYA, reverse transcriptase, integrase domains in various combinations	--	--	-	-	-
Unigene000901	578	--	--	XP_015080850.1	PREDICTED: uncharacterized mitochondrial protein AtMg00810-like [Solanum pennellii]	--	--	At2g15870	KOG0017	FOG: Transposon-encoded proteins with TYA, reverse transcriptase, integrase domains in various combinations	--	--	-	-	-
Unigene000902	230	--	--	EOX94092.1	Gag protease polyprotein [Theobroma cacao]	sp|Q7LHG5|YI31B_YEAST	Transposon Ty3-I Gag-Pol polyprotein OS=Saccharomyces cerevisiae (strain ATCC 204508 / S288c) GN=TY3B-I PE=3 SV=2	At2g14650	KOG0017	FOG: Transposon-encoded proteins with TYA, reverse transcriptase, integrase domains in various combinations	--	--	GO:0008152//metabolic process;GO:0044238//primary metabolic process;GO:0043170//macromolecule metabolic process;GO:0071704//organic substance metabolic process	GO:0003824//catalytic activity;GO:0016787//hydrolase activity;GO:0005488//binding;GO:0043167//ion binding;GO:0008233//peptidase activity;GO:0043169//cation binding;GO:0046872//metal ion binding	-
Unigene000903	453	--	--	--	--	--	--	--	--	--	--	--	-	-	-
Unigene000904	727	--	--	CAE04422.2	OSJNBb0040D15.12 [Oryza sativa Japonica Group]	sp|P10978|POLX_TOBAC	Retrovirus-related Pol polyprotein from transposon TNT 1-94 OS=Nicotiana tabacum PE=2 SV=1	At3g61330	KOG0017	FOG: Transposon-encoded proteins with TYA, reverse transcriptase, integrase domains in various combinations	--	--	-	-	-
Unigene000905	267	--	--	KHN26160.1	MADS-box transcription factor ANR1 [Glycine soja]	--	--	At1g36590_2	KOG0017	FOG: Transposon-encoded proteins with TYA, reverse transcriptase, integrase domains in various combinations	--	--	-	-	-
Unigene000906	274	AT4G13420.1	high affinity K+ transporter 5|Chr4:7797038-7802174 REVERSE LENGTH=785	XP_017413037.1	PREDICTED: potassium transporter 5-like [Vigna angularis]	sp|Q5JK32|HAK5_ORYSJ	Potassium transporter 5 OS=Oryza sativa subsp. japonica GN=HAK5 PE=2 SV=2	--	--	--	K03549//KUP system potassium uptake protein	mdm:103430201	GO:0015672//monovalent inorganic cation transport;GO:0009987//cellular process;GO:0006812//cation transport;GO:0006811//ion transport;GO:0044699//single-organism process;GO:0044763//single-organism cellular process;GO:0051234//establishment of localization;GO:0071804//cellular potassium ion transport;GO:1902578//single-organism localization;GO:0006813//potassium ion transport;GO:0044765//single-o…	GO:0005215//transporter activity;GO:0022892//substrate-specific transporter activity;GO:0046873//metal ion transmembrane transporter activity;GO:0022891//substrate-specific transmembrane transporter activity;GO:0022857//transmembrane transporter activity;GO:0008324//cation transmembrane transporter activity;GO:0015075//ion transmembrane transporter activity;GO:0022890//inorganic cation transmembr…	GO:0016020//membrane;GO:0031224//intrinsic component of membrane;GO:0044425//membrane part
Unigene000907	350	--	--	--	--	--	--	--	--	--	--	--	-	-	-
Unigene000908	399	--	--	--	--	--	--	--	--	--	--	--	-	-	-
Unigene000909	420	--	--	KVI11655.1	WD40-repeat-containing domain-containing protein, partial [Cynara cardunculus var. scolymus]	--	--	--	--	--	--	--	-	-	-
Unigene000910	456	AT3G30770.1	Eukaryotic aspartyl protease family protein|Chr3:12445493-12448085 FORWARD LENGTH=603	ADN34016.1	ty3-gypsy retrotransposon protein [Cucumis melo subsp. melo]	--	--	--	--	--	--	--	-	-	-
Unigene000911	508	--	--	--	--	--	--	--	--	--	--	--	-	-	-
Unigene000912	205	--	--	--	--	--	--	--	--	--	--	--	-	-	-
Unigene000913	203	--	--	KYP64149.1	Retrovirus-related Pol polyprotein from transposon TNT 1-94, partial [Cajanus cajan]	sp|P10978|POLX_TOBAC	Retrovirus-related Pol polyprotein from transposon TNT 1-94 OS=Nicotiana tabacum PE=2 SV=1	At1g58140	KOG0017	FOG: Transposon-encoded proteins with TYA, reverse transcriptase, integrase domains in various combinations	--	--	-	-	-
Unigene000914	645	AT5G36930.2	Disease resistance protein (TIR-NBS-LRR class) family|Chr5:14567771-14571916 REVERSE LENGTH=1191	XP_008362577.1	PREDICTED: TMV resistance protein N-like [Malus domestica]	sp|Q40392|TMVRN_NICGU	TMV resistance protein N OS=Nicotiana glutinosa GN=N PE=1 SV=1	At1g47370	KOG0619	FOG: Leucine rich repeat	--	--	-	-	-
Unigene000915	1568	AT5G25900.1	GA requiring 3|Chr5:9036073-9038278 FORWARD LENGTH=509	BAG71197.1	ent-kaurene oxidase 1 [Lactuca sativa]	sp|Q93ZB2|KO1_ARATH	Ent-kaurene oxidase, chloroplastic OS=Arabidopsis thaliana GN=KO PE=1 SV=2	At5g25900	KOG0156	Cytochrome P450 CYP2 subfamily	K04122//ent-kaurene oxidase [EC:1.14.13.78]	sot:102589573	-	-	-
Unigene000916	373	--	--	--	--	--	--	--	--	--	--	--	-	-	-
Unigene000917	305	--	--	--	--	--	--	--	--	--	--	--	-	-	-
Unigene000918	216	--	--	--	--	--	--	--	--	--	--	--	-	-	-
Unigene000919	330	--	--	XP_001838882.1	macrofage activating glycoprotein [Coprinopsis cinerea okayama7#130]// EAU82926.1 macrofage activating glycoprotein [Coprinopsis cinerea okayama7#130]	--	--	--	--	--	--	--	-	-	-
Unigene000920	396	AT1G59820.1	aminophospholipid ATPase 3|Chr1:22011599-22020023 FORWARD LENGTH=1213	KHN15612.1	Phospholipid-transporting ATPase 3, partial [Glycine soja]	sp|Q9XIE6|ALA3_ARATH	Phospholipid-transporting ATPase 3 OS=Arabidopsis thaliana GN=ALA3 PE=1 SV=2	At1g59820	KOG0206	P-type ATPase	K14802//phospholipid-transporting ATPase [EC:3.6.3.1]	atr:18432562	-	-	-
Unigene000921	216	--	--	KVH91499.1	hypothetical protein Ccrd_006478 [Cynara cardunculus var. scolymus]	--	--	--	--	--	--	--	-	-	-
Unigene000922	495	--	--	--	--	--	--	--	--	--	--	--	-	-	-
Unigene000923	691	--	--	--	--	--	--	--	--	--	--	--	-	-	-
Unigene000924	508	--	--	--	--	--	--	--	--	--	--	--	-	-	-
Unigene000925	546	--	--	--	--	--	--	--	--	--	--	--	-	-	-
Unigene000926	295	--	--	--	--	--	--	--	--	--	--	--	-	-	-
Unigene000927	282	--	--	--	--	--	--	--	--	--	--	--	-	-	-
Unigene000928	203	--	--	--	--	--	--	--	--	--	--	--	-	-	-
Unigene000929	457	--	--	--	--	--	--	--	--	--	--	--	-	-	-
Unigene000930	604	--	--	--	--	--	--	--	--	--	--	--	-	-	-
Unigene000931	512	--	--	--	--	--	--	--	--	--	--	--	-	-	-
Unigene000932	292	--	--	--	--	--	--	--	--	--	--	--	-	-	-
Unigene000933	1458	--	--	--	--	--	--	--	--	--	--	--	-	-	-
Unigene000934	333	AT4G14746.2	neurogenic locus notch-like protein|Chr4:8463223-8464326 REVERSE LENGTH=174	XP_013467030.1	neurogenic locus notch-like protein [Medicago truncatula]// KEH41065.1 neurogenic locus notch-like protein [Medicago truncatula]	--	--	--	--	--	--	--	-	-	-
Unigene000935	501	--	--	--	--	--	--	--	--	--	--	--	-	-	-
Unigene000936	601	AT1G55120.1	beta-fructofuranosidase 5|Chr1:20566617-20569165 FORWARD LENGTH=594	CAC19366.1	fructan 1-exohydrolase I [Cichorium intybus]	sp|Q5JJV0|INV4_ORYSJ	Beta-fructofuranosidase, insoluble isoenzyme 4 OS=Oryza sativa subsp. japonica GN=CIN4 PE=2 SV=1	At1g55120	KOG0228	Beta-fructofuranosidase (invertase)	K01193//beta-fructofuranosidase [EC:3.2.1.26]	vvi:100262911	GO:0008152//metabolic process	GO:0003824//catalytic activity;GO:0016787//hydrolase activity	-
Unigene000937	278	--	--	--	--	--	--	--	--	--	--	--	-	-	-
Unigene000938	413	--	--	--	--	--	--	--	--	--	--	--	-	-	-
Unigene000939	362	--	--	--	--	--	--	--	--	--	--	--	-	-	-
Unigene000940	1105	AT3G57030.1	Calcium-dependent phosphotriesterase superfamily protein|Chr3:21101653-21103204 REVERSE LENGTH=374	KVI06490.1	Six-bladed beta-propeller, TolB-like protein [Cynara cardunculus var. scolymus]	sp|Q4V3D9|SSL10_ARATH	Protein STRICTOSIDINE SYNTHASE-LIKE 10 OS=Arabidopsis thaliana GN=SSL10 PE=2 SV=1	At3g57030	KOG1520	Predicted alkaloid synthase/Surface mucin Hemomucin	--	--	-	-	-
Unigene000941	222	--	--	--	--	--	--	--	--	--	--	--	-	-	-
Unigene000942	611	--	--	--	--	--	--	--	--	--	--	--	-	-	-
Unigene000943	732	--	--	--	--	--	--	--	--	--	--	--	-	-	-
Unigene000944	1090	--	--	--	--	--	--	--	--	--	--	--	-	-	-
Unigene000945	537	--	--	--	--	--	--	--	--	--	--	--	-	-	-
Unigene000946	210	--	--	--	--	--	--	--	--	--	--	--	-	-	-
Unigene000947	217	--	--	--	--	--	--	--	--	--	--	--	-	-	-
Unigene000948	977	--	--	--	--	--	--	--	--	--	--	--	-	-	-
Unigene000949	340	--	--	--	--	--	--	--	--	--	--	--	-	-	-
Unigene000950	202	--	--	--	--	--	--	--	--	--	--	--	-	-	-
Unigene000951	756	--	--	--	--	--	--	--	--	--	--	--	-	-	-
Unigene000952	1210	--	--	--	--	--	--	--	--	--	--	--	-	-	-
Unigene000953	205	--	--	--	--	--	--	--	--	--	--	--	-	-	-
Unigene000954	437	--	--	--	--	--	--	--	--	--	--	--	-	-	-
Unigene000955	215	--	--	--	--	--	--	--	--	--	--	--	-	-	-
Unigene000956	804	--	--	--	--	--	--	--	--	--	--	--	-	-	-
Unigene000957	321	--	--	--	--	--	--	--	--	--	--	--	-	-	-
Unigene000958	336	--	--	--	--	--	--	--	--	--	--	--	-	-	-
Unigene000959	341	--	--	--	--	--	--	--	--	--	--	--	-	-	-
Unigene000960	396	--	--	XP_010648376.1	PREDICTED: protein BIG GRAIN 1-like A [Vitis vinifera]	sp|Q9LVK2|BIG1A_ARATH	Protein BIG GRAIN 1-like A OS=Arabidopsis thaliana GN=At3g13980 PE=3 SV=1	--	--	--	--	--	-	-	-
Unigene000961	207	--	--	--	--	--	--	--	--	--	--	--	-	-	-
Unigene000962	435	--	--	--	--	--	--	--	--	--	--	--	-	-	-
Unigene000963	219	--	--	KVI00272.1	Nuclear pore complex protein [Cynara cardunculus var. scolymus]	--	--	--	--	--	--	--	-	-	-
Unigene000964	437	--	--	--	--	--	--	--	--	--	--	--	-	-	-
Unigene000965	413	--	--	KVH89338.1	Dil domain-containing protein [Cynara cardunculus var. scolymus]	--	--	--	--	--	K10357//myosin V	sot:102586997	-	-	-
Unigene000966	321	--	--	KVI02100.1	hypothetical protein Ccrd_019620 [Cynara cardunculus var. scolymus]	--	--	--	--	--	--	--	-	-	-
Unigene000967	571	--	--	--	--	--	--	--	--	--	--	--	-	-	-
Unigene000968	672	--	--	--	--	--	--	--	--	--	--	--	-	-	-
Unigene000969	276	--	--	--	--	--	--	--	--	--	--	--	-	-	-
Unigene000970	323	--	--	--	--	--	--	--	--	--	--	--	-	-	-
Unigene000971	413	--	--	KVH90952.1	F-box domain, cyclin-like protein, partial [Cynara cardunculus var. scolymus]	--	--	--	--	--	--	--	-	-	-
Unigene000972	477	ATMG00710.1	Polynucleotidyl transferase%2C ribonuclease H-like superfamily protein|ChrM:207553-207915 REVERSE LENGTH=120	BAF03924.2	Os01g0146700 [Oryza sativa Japonica Group]	sp|P10978|POLX_TOBAC	Retrovirus-related Pol polyprotein from transposon TNT 1-94 OS=Nicotiana tabacum PE=2 SV=1	At1g53810	KOG0017	FOG: Transposon-encoded proteins with TYA, reverse transcriptase, integrase domains in various combinations	--	--	-	-	-
Unigene000973	395	--	--	--	--	--	--	--	--	--	--	--	-	-	-
Unigene000974	931	--	--	--	--	--	--	--	--	--	--	--	-	-	-
Unigene000975	431	--	--	--	--	--	--	--	--	--	--	--	-	-	-
Unigene000976	329	AT2G33420.1	hypothetical protein (DUF810)|Chr2:14158782-14162304 FORWARD LENGTH=1039	KVH91035.1	Mammalian uncoordinated homology 13, domain 2 [Cynara cardunculus var. scolymus]	--	--	--	--	--	--	--	-	-	-
Unigene000977	245	--	--	--	--	--	--	--	--	--	--	--	-	-	-
Unigene000978	429	--	--	KYP38698.1	Retrovirus-related Pol polyprotein from transposon TNT 1-94 [Cajanus cajan]	--	--	At4g28900	KOG0017	FOG: Transposon-encoded proteins with TYA, reverse transcriptase, integrase domains in various combinations	--	--	-	-	-
Unigene000979	331	--	--	--	--	--	--	--	--	--	--	--	-	-	-
Unigene000980	373	--	--	--	--	--	--	--	--	--	--	--	-	-	-
Unigene000981	235	--	--	--	--	--	--	--	--	--	--	--	-	-	-
Unigene000982	756	--	--	--	--	--	--	--	--	--	--	--	-	-	-
Unigene000983	721	AT1G56240.1	phloem protein 2-B13|Chr1:21056351-21057409 REVERSE LENGTH=284	KVH89788.1	Phloem protein 2-like protein [Cynara cardunculus var. scolymus]	sp|Q9C7J9|P2B13_ARATH	F-box protein PP2-B13 OS=Arabidopsis thaliana GN=PP2B13 PE=2 SV=1	--	--	--	--	--	-	-	-
Unigene000984	1024	AT5G43120.2	ARM-repeat/Tetratricopeptide repeat (TPR)-like protein|Chr5:17312602-17314503 FORWARD LENGTH=601	KVH98284.1	Armadillo-like helical [Cynara cardunculus var. scolymus]	sp|Q99614|TTC1_HUMAN	Tetratricopeptide repeat protein 1 OS=Homo sapiens GN=TTC1 PE=1 SV=1	Hs4507711	KOG4234	TPR repeat-containing protein	--	--	-	-	-
Unigene000985	513	--	--	--	--	--	--	--	--	--	--	--	-	-	-
Unigene000986	607	--	--	--	--	--	--	--	--	--	--	--	-	-	-
Unigene000987	530	AT2G04240.2	RING/U-box superfamily protein|Chr2:1461816-1462304 REVERSE LENGTH=162	KVH97513.1	Zinc finger, RING/FYVE/PHD-type [Cynara cardunculus var. scolymus]	sp|Q9SI09|XERIC_ARATH	Probable E3 ubiquitin-protein ligase XERICO OS=Arabidopsis thaliana GN=XERICO PE=1 SV=1	At2g04240	KOG0800	FOG: Predicted E3 ubiquitin ligase	--	--	-	-	-
Unigene000988	689	--	--	--	--	--	--	--	--	--	--	--	-	-	-
Unigene000989	569	AT2G42600.3	phosphoenolpyruvate carboxylase 2|Chr2:17734541-17738679 REVERSE LENGTH=963	AIF35298.1	phosphoenolpyruvate carboxylase, partial [Adenogramma teretifolia]	sp|Q9FV65|CAPPC_FLATR	Phosphoenolpyruvate carboxylase 2 OS=Flaveria trinervia GN=PPCC PE=1 SV=1	--	--	--	K01595//phosphoenolpyruvate carboxylase [EC:4.1.1.31]	mdm:103417328	-	-	-
Unigene000990	216	--	--	--	--	--	--	--	--	--	--	--	-	-	-
Unigene000991	620	AT1G52140.1	Avr9/Cf-9 rapidly elicited protein|Chr1:19407559-19408185 REVERSE LENGTH=208	GAV92081.1	DUF761 domain-containing protein [Cephalotus follicularis]	--	--	--	--	--	--	--	-	-	-
Unigene000992	444	--	--	--	--	--	--	--	--	--	--	--	-	-	-
Unigene000993	2710	AT4G35440.1	chloride channel E|Chr4:16836384-16839345 REVERSE LENGTH=710	KVH92459.1	Chloride channel, core, partial [Cynara cardunculus var. scolymus]	sp|Q8GX93|CLCE_ARATH	Chloride channel protein CLC-e OS=Arabidopsis thaliana GN=CLC-E PE=2 SV=2	At4g35440	KOG0475	Cl- channel CLC-3 and related proteins (CLC superfamily)	--	--	GO:0051179//localization;GO:0051234//establishment of localization;GO:0055085//transmembrane transport;GO:0006811//ion transport;GO:0034220//ion transmembrane transport;GO:0006820//anion transport;GO:0006810//transport	-	GO:0016020//membrane
Unigene000994	2274	AT4G35440.1	chloride channel E|Chr4:16836384-16839345 REVERSE LENGTH=710	KVH92459.1	Chloride channel, core, partial [Cynara cardunculus var. scolymus]	sp|Q8GX93|CLCE_ARATH	Chloride channel protein CLC-e OS=Arabidopsis thaliana GN=CLC-E PE=2 SV=2	At4g35440	KOG0475	Cl- channel CLC-3 and related proteins (CLC superfamily)	--	--	-	-	-
Unigene000995	262	--	--	--	--	--	--	--	--	--	--	--	-	-	-
Unigene000996	277	AT5G61380.1	CCT motif -containing response regulator protein|Chr5:24675540-24678176 FORWARD LENGTH=618	KVH98515.1	CCT domain-containing protein [Cynara cardunculus var. scolymus]	sp|Q9LKL2|APRR1_ARATH	Two-component response regulator-like APRR1 OS=Arabidopsis thaliana GN=APRR1 PE=1 SV=1	At5g61380	KOG1601	GATA-4/5/6 transcription factors	K12127//pseudo-response regulator 1	sot:102582324	-	-	-
Unigene000997	460	--	--	--	--	--	--	--	--	--	--	--	-	-	-
Unigene000998	2056	AT3G18670.1	Ankyrin repeat family protein|Chr3:6424135-6426471 REVERSE LENGTH=598	KVH87673.1	Ankyrin repeat-containing protein [Cynara cardunculus var. scolymus]	sp|Q6AWW5|Y5262_ARATH	Ankyrin repeat-containing protein At5g02620 OS=Arabidopsis thaliana GN=At5g02620 PE=1 SV=1	At3g54070	KOG0504	FOG: Ankyrin repeat	--	--	-	-	-
Unigene000999	556	--	--	--	--	--	--	--	--	--	--	--	-	-	-
Unigene001000	501	AT5G67300.1	myb domain protein r1|Chr5:26854109-26855026 FORWARD LENGTH=305	KVI01882.1	Homeodomain-like protein [Cynara cardunculus var. scolymus]	sp|Q9FDW1|MYB44_ARATH	Transcription factor MYB44 OS=Arabidopsis thaliana GN=MYB44 PE=2 SV=1	At5g67300	KOG0048	Transcription factor, Myb superfamily	K09422//myb proto-oncogene protein, plant	pmum:103335149	-	-	-
Unigene001001	222	--	--	--	--	--	--	--	--	--	--	--	-	-	-
Unigene001002	208	--	--	--	--	--	--	--	--	--	--	--	-	-	-
Unigene001003	216	--	--	--	--	--	--	--	--	--	--	--	-	-	-
Unigene001004	308	AT1G07990.2	SIT4 phosphatase-associated family protein|Chr1:2477413-2481942 FORWARD LENGTH=588	XP_007016756.2	PREDICTED: serine/threonine-protein phosphatase 6 regulatory subunit 3 isoform X2 [Theobroma cacao]	--	--	At1g07990	KOG2073	SAP family cell cycle dependent phosphatase-associated protein	K15501//serine/threonine-protein phosphatase 6 regulatory subunit 3	tcc:TCM_042064	-	-	-
Unigene001005	391	AT3G14580.1	Pentatricopeptide repeat (PPR) superfamily protein|Chr3:4903012-4904229 FORWARD LENGTH=405	KVI02130.1	Pentatricopeptide repeat-containing protein [Cynara cardunculus var. scolymus]	sp|Q9LUD6|PP230_ARATH	Pentatricopeptide repeat-containing protein At3g14580, mitochondrial OS=Arabidopsis thaliana GN=At3g14580 PE=2 SV=1	At3g14580	KOG4197	FOG: PPR repeat	--	--	-	-	-
Unigene001006	258	AT3G14580.1	Pentatricopeptide repeat (PPR) superfamily protein|Chr3:4903012-4904229 FORWARD LENGTH=405	KVI02130.1	Pentatricopeptide repeat-containing protein [Cynara cardunculus var. scolymus]	sp|Q9LUD6|PP230_ARATH	Pentatricopeptide repeat-containing protein At3g14580, mitochondrial OS=Arabidopsis thaliana GN=At3g14580 PE=2 SV=1	At3g14580	KOG4197	FOG: PPR repeat	--	--	-	-	-
Unigene001007	443	--	--	--	--	--	--	--	--	--	--	--	-	-	-
Unigene001008	679	--	--	--	--	--	--	--	--	--	--	--	-	-	-
Unigene001009	890	--	--	--	--	--	--	--	--	--	--	--	-	-	-
Unigene001010	514	--	--	--	--	--	--	--	--	--	--	--	-	-	-
Unigene001011	589	--	--	--	--	--	--	--	--	--	--	--	-	-	-
Unigene001012	250	--	--	--	--	--	--	--	--	--	--	--	-	-	-
Unigene001013	389	AT5G15450.1	casein lytic proteinase B3|Chr5:5014399-5018255 REVERSE LENGTH=968	GAW03650.1	heat shock protein hsp98 [Lentinula edodes]	sp|O94641|HS104_SCHPO	Heat shock protein 104 OS=Schizosaccharomyces pombe (strain 972 / ATCC 24843) GN=hsp104 PE=3 SV=1	SPBC16D10.08c	KOG1051	Chaperone HSP104 and related ATP-dependent Clp proteases	K03695//ATP-dependent Clp protease ATP-binding subunit ClpB	gsl:Gasu_55830	GO:0009987//cellular process;GO:0044763//single-organism cellular process;GO:0034605//cellular response to heat;GO:0044237//cellular metabolic process;GO:0050896//response to stimulus;GO:0044699//single-organism process;GO:0033554//cellular response to stress;GO:0008152//metabolic process;GO:0006457//protein folding;GO:0044238//primary metabolic process;GO:0043170//macromolecule metabolic process…	GO:0032550//purine ribonucleoside binding;GO:0016787//hydrolase activity;GO:0016817//hydrolase activity, acting on acid anhydrides;GO:0005515//protein binding;GO:0016818//hydrolase activity, acting on acid anhydrides, in phosphorus-containing anhydrides;GO:0003824//catalytic activity;GO:0005488//binding;GO:0036094//small molecule binding;GO:0097367//carbohydrate derivative binding;GO:0032549//rib…	GO:0005623//cell;GO:0044424//intracellular part;GO:0005737//cytoplasm;GO:0005622//intracellular;GO:0044464//cell part
Unigene001014	366	--	--	--	--	--	--	--	--	--	--	--	-	-	-
Unigene001015	526	--	--	--	--	--	--	--	--	--	--	--	-	-	-
Unigene001016	488	--	--	--	--	--	--	--	--	--	--	--	-	-	-
Unigene001017	587	--	--	--	--	--	--	--	--	--	--	--	-	-	-
Unigene001018	770	--	--	--	--	--	--	--	--	--	--	--	-	-	-
Unigene001019	224	--	--	--	--	--	--	--	--	--	--	--	-	-	-
Unigene001020	536	--	--	--	--	--	--	--	--	--	--	--	-	-	-
Unigene001021	240	--	--	CAD39797.2	OSJNBa0071G03.10 [Oryza sativa Japonica Group]	--	--	At4g03810	KOG0017	FOG: Transposon-encoded proteins with TYA, reverse transcriptase, integrase domains in various combinations	--	--	-	-	-
Unigene001022	207	--	--	--	--	--	--	--	--	--	--	--	-	-	-
Unigene001023	602	AT1G30950.1	F-box family protein|Chr1:11036180-11037508 FORWARD LENGTH=442	KVI06017.1	F-box domain, cyclin-like protein [Cynara cardunculus var. scolymus]	sp|Q39090|UFO_ARATH	Protein UNUSUAL FLORAL ORGANS OS=Arabidopsis thaliana GN=UFO PE=1 SV=2	--	--	--	--	--	-	-	-
Unigene001024	360	--	--	--	--	--	--	--	--	--	--	--	-	-	-
Unigene001025	447	AT4G36220.1	ferulic acid 5-hydroxylase 1|Chr4:17137584-17139619 REVERSE LENGTH=520	KVI02897.1	cytochrome P450 [Cynara cardunculus var. scolymus]	sp|Q42600|C84A1_ARATH	Cytochrome P450 84A1 OS=Arabidopsis thaliana GN=CYP84A1 PE=1 SV=1	At4g36220	KOG0156	Cytochrome P450 CYP2 subfamily	K09755//ferulate-5-hydroxylase [EC:1.14.-.-]	cit:102629219	-	-	-
Unigene001026	384	--	--	--	--	--	--	--	--	--	--	--	-	-	-
Unigene001027	205	AT3G10340.1	phenylalanine ammonia-lyase 4|Chr3:3204260-3207809 FORWARD LENGTH=707	AGK44863.1	phenylalanine ammonia-lyase, partial [Artemisia absinthium]	sp|O04058|PALY_HELAN	Phenylalanine ammonia-lyase OS=Helianthus annuus GN=PAL PE=2 SV=2	At3g10340	KOG0222	Phenylalanine and histidine ammonia-lyase	K10775//phenylalanine ammonia-lyase [EC:4.3.1.24]	fve:101315259	-	-	-
Unigene001028	414	--	--	--	--	--	--	--	--	--	--	--	-	-	-
Unigene001029	210	AT3G28510.1	P-loop containing nucleoside triphosphate hydrolases superfamily protein|Chr3:10685656-10687248 FORWARD LENGTH=530	KVI02209.1	AAA+ ATPase domain-containing protein [Cynara cardunculus var. scolymus]	sp|Q9LH84|AATP5_ARATH	AAA-ATPase At3g28510 OS=Arabidopsis thaliana GN=At3g28510 PE=2 SV=1	At3g28510	KOG0743	AAA+-type ATPase	K08900//mitochondrial chaperone BCS1	sot:102585539	-	-	-
Unigene001030	221	ATCG00120.1	ATP synthase subunit alpha|ChrC:9938-11461 REVERSE LENGTH=507	YP_009171584.1	ATP synthase CF1 alpha subunit (chloroplast) [Elaeagnus macrophylla]// AKE36481.1 ATP synthase CF1 alpha subunit (chloroplast) [Elaeagnus macrophylla]	sp|Q1KXW5|ATPA_HELAN	ATP synthase subunit alpha, chloroplastic OS=Helianthus annuus GN=atpA PE=3 SV=1	AtCh008	KOG1353	F0F1-type ATP synthase, alpha subunit	K02111//F-type H+-transporting ATPase subunit alpha [EC:3.6.3.14]	fve:10251490	GO:0009163//nucleoside biosynthetic process;GO:0044763//single-organism cellular process;GO:0042278//purine nucleoside metabolic process;GO:0046034//ATP metabolic process;GO:0044249//cellular biosynthetic process;GO:0046483//heterocycle metabolic process;GO:0006754//ATP biosynthetic process;GO:0055085//transmembrane transport;GO:0019637//organophosphate metabolic process;GO:0009987//cellular proc…	GO:0008324//cation transmembrane transporter activity;GO:0022891//substrate-specific transmembrane transporter activity;GO:0019829//cation-transporting ATPase activity;GO:0042626//ATPase activity, coupled to transmembrane movement of substances;GO:0015077//monovalent inorganic cation transmembrane transporter activity;GO:0032549//ribonucleoside binding;GO:0022804//active transmembrane transporter…	GO:0005737//cytoplasm;GO:0098796//membrane protein complex;GO:0044444//cytoplasmic part;GO:0044434//chloroplast part;GO:0009536//plastid;GO:0044424//intracellular part;GO:0009579//thylakoid;GO:0043227//membrane-bounded organelle;GO:0032991//macromolecular complex;GO:0033178//proton-transporting two-sector ATPase complex, catalytic domain;GO:0031976//plastid thylakoid;GO:0031984//organelle subcomp…
Unigene001031	219	--	--	EOX93543.1	Rubisco methyltransferase family protein [Theobroma cacao]	--	--	--	--	--	--	--	-	GO:0003824//catalytic activity	-
Unigene001032	221	--	--	--	--	--	--	--	--	--	--	--	-	-	-
Unigene001033	392	--	--	--	--	--	--	--	--	--	--	--	-	-	-
Unigene001034	235	--	--	--	--	--	--	--	--	--	--	--	-	-	-
Unigene001035	226	--	--	--	--	--	--	--	--	--	--	--	-	-	-
Unigene001036	246	--	--	--	--	--	--	--	--	--	--	--	-	-	-
Unigene001037	773	--	--	--	--	--	--	--	--	--	--	--	-	-	-
Unigene001038	461	--	--	--	--	--	--	--	--	--	--	--	-	-	-
Unigene001039	269	--	--	--	--	--	--	--	--	--	--	--	-	-	-
Unigene001040	938	--	--	--	--	--	--	--	--	--	--	--	-	-	-
Unigene001041	324	--	--	--	--	--	--	--	--	--	--	--	-	-	-
Unigene001042	720	--	--	--	--	--	--	--	--	--	--	--	-	-	-
Unigene001043	233	--	--	--	--	--	--	--	--	--	--	--	-	-	-
Unigene001044	230	--	--	--	--	--	--	--	--	--	--	--	-	-	-
Unigene001045	448	ATMG01190.1	ATP synthase subunit 1|ChrM:302166-303689 REVERSE LENGTH=507	EMT62177.1	ATP synthase subunit alpha, mitochondrial [Fusarium oxysporum f. sp. cubense race 4]	sp|P37211|ATPA_NEUCR	ATP synthase subunit alpha, mitochondrial OS=Neurospora crassa (strain ATCC 24698 / 74-OR23-1A / CBS 708.71 / DSM 1257 / FGSC 987) GN=atp-1 PE=3 SV=1	YBL099w	KOG1353	F0F1-type ATP synthase, alpha subunit	K02132//F-type H+-transporting ATPase subunit alpha	ccp:CHC_T00009194001	GO:0051179//localization;GO:0055086//nucleobase-containing small molecule metabolic process;GO:0044763//single-organism cellular process;GO:0009205//purine ribonucleoside triphosphate metabolic process;GO:0009260//ribonucleotide biosynthetic process;GO:1901137//carbohydrate derivative biosynthetic process;GO:0046129//purine ribonucleoside biosynthetic process;GO:0006796//phosphate-containing comp…	GO:0016820//hydrolase activity, acting on acid anhydrides, catalyzing transmembrane movement of substances;GO:0015399//primary active transmembrane transporter activity;GO:0016787//hydrolase activity;GO:0022891//substrate-specific transmembrane transporter activity;GO:0019829//cation-transporting ATPase activity;GO:1901363//heterocyclic compound binding;GO:0005215//transporter activity;GO:0017111…	GO:0098796//membrane protein complex;GO:0032991//macromolecular complex;GO:0043234//protein complex;GO:0044425//membrane part;GO:0016020//membrane;GO:0033178//proton-transporting two-sector ATPase complex, catalytic domain;GO:0016469//proton-transporting two-sector ATPase complex
Unigene001046	530	--	--	--	--	--	--	--	--	--	--	--	-	-	-
Unigene001047	495	--	--	--	--	--	--	--	--	--	--	--	-	-	-
Unigene001048	234	--	--	--	--	--	--	--	--	--	--	--	-	-	-
Unigene001049	601	--	--	--	--	--	--	--	--	--	--	--	-	-	-
Unigene001050	1443	--	--	BAF26194.2	Os10g0192300 [Oryza sativa Japonica Group]	--	--	At1g54430	KOG0987	DNA helicase PIF1/RRM3	--	--	-	-	-
Unigene001051	213	--	--	XP_019163086.1	PREDICTED: ATP-dependent DNA helicase RRM3-like [Ipomoea nil]	--	--	--	--	--	--	--	-	-	-
Unigene001052	833	AT4G27900.2	CCT motif family protein|Chr4:13890858-13892777 FORWARD LENGTH=261	KVI10165.1	CCT domain-containing protein [Cynara cardunculus var. scolymus]	--	--	--	--	--	--	--	-	-	-
Unigene001053	420	--	--	--	--	--	--	--	--	--	--	--	-	-	-
Unigene001054	231	--	--	--	--	--	--	--	--	--	--	--	-	-	-
Unigene001055	215	--	--	--	--	--	--	--	--	--	--	--	-	-	-
Unigene001056	687	AT3G42170.1	BED zinc finger and hAT dimerization domain-containing protein DAYSLEEPER|Chr3:14321838-14323928 FORWARD LENGTH=696	JAV44869.1	BED zinc finger [Citrus limon]	sp|Q6AVI0|RSLE2_ORYSJ	Zinc finger BED domain-containing protein RICESLEEPER 2 OS=Oryza sativa subsp. japonica GN=Os03g0733400 PE=2 SV=1	At3g42170	KOG1121	Tam3-transposase (Ac family)	--	--	-	-	-
Unigene001057	233	AT1G02065.2	squamosa promoter binding protein-like 8|Chr1:365625-366365 FORWARD LENGTH=246	KVH97080.1	Transcription factor, SBP-box [Cynara cardunculus var. scolymus]	sp|Q8GXL3|SPL8_ARATH	Squamosa promoter-binding-like protein 8 OS=Arabidopsis thaliana GN=SPL8 PE=1 SV=2	--	--	--	--	--	GO:0006139//nucleobase-containing compound metabolic process;GO:1901362//organic cyclic compound biosynthetic process;GO:1901576//organic substance biosynthetic process;GO:0032501//multicellular organismal process;GO:0044767//single-organism developmental process;GO:0009555//pollen development;GO:0044699//single-organism process;GO:1901360//organic cyclic compound metabolic process;GO:0044238//pr…	GO:0043167//ion binding;GO:0005488//binding;GO:0003676//nucleic acid binding;GO:1901363//heterocyclic compound binding;GO:0043169//cation binding;GO:0097159//organic cyclic compound binding	GO:0044424//intracellular part;GO:0043226//organelle;GO:0005623//cell;GO:0043231//intracellular membrane-bounded organelle;GO:0043227//membrane-bounded organelle;GO:0005622//intracellular;GO:0043229//intracellular organelle;GO:0044464//cell part
Unigene001058	315	AT5G02010.1	RHO guanyl-nucleotide exchange factor 7|Chr5:383493-385698 FORWARD LENGTH=546	KVI09881.1	Plant specific Rop nucleotide exchanger, PRONE [Cynara cardunculus var. scolymus]	sp|Q9LZN0|ROGF7_ARATH	Rop guanine nucleotide exchange factor 7 OS=Arabidopsis thaliana GN=ROPGEF7 PE=1 SV=1	--	--	--	--	--	GO:0051336//regulation of hydrolase activity;GO:0043087//regulation of GTPase activity;GO:0065007//biological regulation;GO:0065009//regulation of molecular function;GO:0050790//regulation of catalytic activity	-	-
Unigene001059	210	--	--	AAT99310.1	LEA protein 12 [Oryza sativa Japonica Group]	--	--	--	--	--	--	--	-	-	-
Unigene001060	225	--	--	--	--	--	--	--	--	--	--	--	-	-	-
Unigene001061	857	AT5G59240.1	Ribosomal protein S8e family protein|Chr5:23902626-23903670 REVERSE LENGTH=210	XP_001830182.1	40S ribosomal protein S8 [Coprinopsis cinerea okayama7#130]// EAU91660.1 40S ribosomal protein S8 [Coprinopsis cinerea okayama7#130]	sp|P0CX40|RS8B_YEAST	40S ribosomal protein S8-B OS=Saccharomyces cerevisiae (strain ATCC 204508 / S288c) GN=RPS8B PE=1 SV=1	YER102w	KOG3283	40S ribosomal protein S8	K02995//small subunit ribosomal protein S8e	zma:542341	GO:0071704//organic substance metabolic process;GO:0008152//metabolic process;GO:0010467//gene expression;GO:0043170//macromolecule metabolic process	-	GO:0044464//cell part;GO:1990904//ribonucleoprotein complex;GO:0030529//intracellular ribonucleoprotein complex;GO:0044424//intracellular part;GO:0005622//intracellular;GO:0005623//cell;GO:0032991//macromolecular complex
Unigene001062	210	--	--	--	--	--	--	--	--	--	--	--	-	-	-
Unigene001063	682	--	--	--	--	--	--	--	--	--	--	--	-	-	-
Unigene001064	239	--	--	--	--	--	--	--	--	--	--	--	-	-	-
Unigene001065	557	--	--	--	--	--	--	--	--	--	--	--	-	-	-
Unigene001066	209	--	--	--	--	--	--	--	--	--	--	--	-	-	-
Unigene001067	315	AT4G39480.1	cytochrome P450%2C family 96%2C subfamily A%2C polypeptide 9|Chr4:18362558-18364108 FORWARD LENGTH=516	KVI02348.1	cytochrome P450 [Cynara cardunculus var. scolymus]	sp|Q9FVS9|C96AF_ARATH	Alkane hydroxylase MAH1 OS=Arabidopsis thaliana GN=CYP96A15 PE=2 SV=1	At4g39480	KOG0157	Cytochrome P450 CYP4/CYP19/CYP26 subfamilies	--	--	-	-	-
Unigene001068	536	--	--	KVH61633.1	Armadillo repeat-containing protein 3 and Serine/threonine-protein kinase CTR1 [Cynara cardunculus var. scolymus]	--	--	--	--	--	--	--	-	-	-
Unigene001069	792	--	--	--	--	--	--	--	--	--	--	--	-	-	-
Unigene001070	290	--	--	--	--	--	--	--	--	--	--	--	-	-	-
Unigene001071	742	AT5G44230.1	Pentatricopeptide repeat (PPR) superfamily protein|Chr5:17814336-17816309 FORWARD LENGTH=657	KVI08809.1	Pentatricopeptide repeat-containing protein [Cynara cardunculus var. scolymus]	sp|Q9FFG8|PP417_ARATH	Pentatricopeptide repeat-containing protein At5g44230 OS=Arabidopsis thaliana GN=PCMP-H17 PE=2 SV=1	At5g44230	KOG4197	FOG: PPR repeat	--	--	-	-	-
Unigene001072	436	--	--	--	--	--	--	--	--	--	--	--	-	-	-
Unigene001073	235	--	--	XP_019104643.1	PREDICTED: extensin-like [Beta vulgaris subsp. vulgaris]	--	--	--	--	--	--	--	-	-	-
Unigene001074	478	--	--	AAF79692.1	F9C16.1, partial [Arabidopsis thaliana]	--	--	At1g43886	KOG0017	FOG: Transposon-encoded proteins with TYA, reverse transcriptase, integrase domains in various combinations	--	--	-	-	-
Unigene001075	498	AT2G36830.1	gamma tonoplast intrinsic protein|Chr2:15445490-15446336 FORWARD LENGTH=251	XP_006649396.1	PREDICTED: probable aquaporin TIP1-1 [Oryza brachyantha]	sp|P50156|TIP11_ORYSJ	Probable aquaporin TIP1-1 OS=Oryza sativa subsp. japonica GN=TIP1-1 PE=2 SV=1	At2g36830	KOG0223	Aquaporin (major intrinsic protein family)	K09873//aquaporin TIP	dosa:Os03t0146100-01	-	-	-
Unigene001076	207	--	--	--	--	--	--	--	--	--	--	--	-	-	-
Unigene001077	219	--	--	--	--	--	--	--	--	--	--	--	-	-	-
Unigene001078	302	--	--	GAV80218.1	UBN2_3 domain-containing protein [Cephalotus follicularis]	--	--	At1g26990	KOG0017	FOG: Transposon-encoded proteins with TYA, reverse transcriptase, integrase domains in various combinations	--	--	-	-	-
Unigene001079	259	--	--	--	--	--	--	--	--	--	--	--	-	-	-
Unigene001080	256	--	--	--	--	--	--	--	--	--	--	--	-	-	-
Unigene001081	290	--	--	--	--	--	--	--	--	--	--	--	-	-	-
Unigene001082	757	--	--	--	--	--	--	--	--	--	--	--	-	-	-
Unigene001083	342	--	--	--	--	--	--	--	--	--	--	--	-	-	-
Unigene001084	219	--	--	--	--	--	--	--	--	--	--	--	-	-	-
Unigene001085	510	--	--	--	--	--	--	--	--	--	--	--	-	-	-
Unigene001086	298	--	--	--	--	--	--	--	--	--	--	--	-	-	-
Unigene001087	207	--	--	--	--	--	--	--	--	--	--	--	-	-	-
Unigene001088	333	AT1G63750.3	Disease resistance protein (TIR-NBS-LRR class) family|Chr1:23650940-23655333 FORWARD LENGTH=1131	KVH88311.1	Disease resistance protein [Cynara cardunculus var. scolymus]	sp|F4KHH8|RPS6C_ARATH	Disease resistance protein RPS6 OS=Arabidopsis thaliana GN=RPS6 PE=1 SV=1	At1g47370	KOG0619	FOG: Leucine rich repeat	--	--	-	-	-
Unigene001089	329	--	--	--	--	--	--	--	--	--	--	--	-	-	-
Unigene001090	427	--	--	--	--	--	--	--	--	--	--	--	-	-	-
Unigene001091	496	--	--	--	--	--	--	--	--	--	--	--	-	-	-
Unigene001092	233	--	--	--	--	--	--	--	--	--	--	--	-	-	-
Unigene001093	466	--	--	--	--	--	--	--	--	--	--	--	-	-	-
Unigene001094	322	AT5G23190.1	cytochrome P450%2C family 86%2C subfamily B%2C polypeptide 1|Chr5:7803478-7805659 REVERSE LENGTH=559	KVI05271.1	cytochrome P450 [Cynara cardunculus var. scolymus]	sp|Q9FMY1|C86B1_ARATH	Cytochrome P450 86B1 OS=Arabidopsis thaliana GN=CYP86B1 PE=2 SV=1	At5g23190	KOG0157	Cytochrome P450 CYP4/CYP19/CYP26 subfamilies	K15402//fatty acid omega-hydroxylase [EC:1.14.-.-]	vvi:100254406	GO:0044699//single-organism process;GO:0044710//single-organism metabolic process;GO:0008152//metabolic process	GO:0097159//organic cyclic compound binding;GO:0046906//tetrapyrrole binding;GO:0043169//cation binding;GO:1901363//heterocyclic compound binding;GO:0043167//ion binding;GO:0046872//metal ion binding;GO:0016491//oxidoreductase activity;GO:0005488//binding;GO:0046914//transition metal ion binding;GO:0003824//catalytic activity	GO:0044425//membrane part;GO:0016020//membrane;GO:0031224//intrinsic component of membrane
Unigene001095	282	AT4G32400.1	Mitochondrial substrate carrier family protein|Chr4:15638686-15640238 FORWARD LENGTH=392	KVH93815.1	Mitochondrial carrier domain-containing protein [Cynara cardunculus var. scolymus]	--	--	--	--	--	--	--	-	-	-
Unigene001096	261	--	--	--	--	--	--	--	--	--	--	--	-	-	-
Unigene001097	274	--	--	--	--	--	--	--	--	--	--	--	-	-	-
Unigene001098	366	--	--	--	--	--	--	--	--	--	--	--	-	-	-
Unigene001099	387	--	--	--	--	--	--	--	--	--	--	--	-	-	-
Unigene001100	454	--	--	XP_020263434.1	keratin, type I cytoskeletal 9-like [Asparagus officinalis]	--	--	At3g59720	KOG0017	FOG: Transposon-encoded proteins with TYA, reverse transcriptase, integrase domains in various combinations	--	--	-	-	-
Unigene001101	516	--	--	--	--	--	--	--	--	--	--	--	-	-	-
Unigene001102	926	--	--	OMO64840.1	Integrase, catalytic core [Corchorus capsularis]	--	--	At1g26990	KOG0017	FOG: Transposon-encoded proteins with TYA, reverse transcriptase, integrase domains in various combinations	--	--	-	-	-
Unigene001103	248	--	--	KYP63363.1	Retrotransposable element Tf2 [Cajanus cajan]	--	--	At4g07850	KOG0017	FOG: Transposon-encoded proteins with TYA, reverse transcriptase, integrase domains in various combinations	--	--	-	-	-
Unigene001104	418	--	--	--	--	--	--	--	--	--	--	--	-	-	-
Unigene001105	589	--	--	--	--	--	--	--	--	--	--	--	-	-	-
Unigene001106	324	--	--	--	--	--	--	--	--	--	--	--	-	-	-
Unigene001107	285	--	--	--	--	--	--	--	--	--	--	--	-	-	-
Unigene001108	376	--	--	XP_007697474.1	hypothetical protein COCSADRAFT_34686 [Bipolaris sorokiniana ND90Pr]// EMD66098.1 hypothetical protein COCSADRAFT_34686 [Bipolaris sorokiniana ND90Pr]	--	--	--	--	--	--	--	-	-	-
Unigene001109	451	AT5G28680.2	Malectin/receptor-like protein kinase family protein|Chr5:10719437-10722013 REVERSE LENGTH=858	KVH89788.1	Phloem protein 2-like protein [Cynara cardunculus var. scolymus]	sp|Q3E8W4|ANX2_ARATH	Receptor-like protein kinase ANXUR2 OS=Arabidopsis thaliana GN=ANX2 PE=2 SV=1	At5g28680	KOG1187	Serine/threonine protein kinase	--	--	-	-	-
Unigene001110	722	AT3G46290.1	hercules receptor kinase 1|Chr3:17013009-17015501 FORWARD LENGTH=830	KVH89788.1	Phloem protein 2-like protein [Cynara cardunculus var. scolymus]	sp|Q9LX66|HERK_ARATH	Receptor-like protein kinase HERK 1 OS=Arabidopsis thaliana GN=HERK1 PE=1 SV=1	At3g46290	KOG1187	Serine/threonine protein kinase	--	--	-	-	-
Unigene001111	575	--	--	--	--	--	--	--	--	--	--	--	-	-	-
Unigene001112	667	--	--	--	--	--	--	--	--	--	--	--	-	-	-
Unigene001113	829	--	--	--	--	--	--	--	--	--	--	--	-	-	-
Unigene001114	696	--	--	--	--	--	--	--	--	--	--	--	-	-	-
Unigene001115	340	--	--	--	--	--	--	--	--	--	--	--	-	-	-
Unigene001116	233	--	--	--	--	--	--	--	--	--	--	--	-	-	-
Unigene001117	244	AT1G48120.1	serine/threonine-protein phosphatase 7 long form-like protein|Chr1:17774238-17779624 REVERSE LENGTH=1340	XP_016577019.1	PREDICTED: serine/threonine-protein phosphatase 7 long form homolog [Capsicum annuum]	sp|Q9LNG5|PPP7L_ARATH	Serine/threonine-protein phosphatase 7 long form homolog OS=Arabidopsis thaliana GN=At1g48120 PE=2 SV=1	--	--	--	--	--	-	-	-
Unigene001118	240	AT4G23160.3	cysteine-rich RECEPTOR-like kinase|Chr4:12129485-12133157 FORWARD LENGTH=1043	JAU60993.1	Retrovirus-related Pol polyprotein from transposon TNT 1-94, partial [Noccaea caerulescens]	sp|P92519|M810_ARATH	Uncharacterized mitochondrial protein AtMg00810 OS=Arabidopsis thaliana GN=AtMg00810 PE=4 SV=1	At1g33817	KOG0017	FOG: Transposon-encoded proteins with TYA, reverse transcriptase, integrase domains in various combinations	--	--	-	-	-
Unigene001119	344	--	--	--	--	--	--	--	--	--	--	--	-	-	-
Unigene001120	409	--	--	--	--	--	--	--	--	--	--	--	-	-	-
Unigene001121	269	--	--	KVH93970.1	Gelsolin domain-containing protein [Cynara cardunculus var. scolymus]	--	--	--	--	--	--	--	-	-	-
Unigene001122	323	--	--	--	--	--	--	--	--	--	--	--	-	-	-
Unigene001123	342	--	--	--	--	--	--	--	--	--	--	--	-	-	-
Unigene001124	436	--	--	--	--	--	--	--	--	--	--	--	-	-	-
Unigene001125	542	--	--	--	--	--	--	--	--	--	--	--	-	-	-
Unigene001126	315	--	--	--	--	--	--	--	--	--	--	--	-	-	-
Unigene001127	434	AT5G40010.1	AAA-ATPase 1|Chr5:16020218-16021762 REVERSE LENGTH=514	KVH92741.1	AAA+ ATPase domain-containing protein [Cynara cardunculus var. scolymus]	sp|Q9FLD5|ASD_ARATH	AAA-ATPase ASD, mitochondrial OS=Arabidopsis thaliana GN=AATP1 PE=1 SV=1	At5g40010	KOG0743	AAA+-type ATPase	K08900//mitochondrial chaperone BCS1	jcu:105642469	-	-	GO:0016020//membrane
Unigene001128	263	--	--	--	--	--	--	--	--	--	--	--	-	-	-
Unigene001129	386	--	--	--	--	--	--	--	--	--	--	--	-	-	-
Unigene001130	236	--	--	--	--	--	--	--	--	--	--	--	-	-	-
Unigene001131	385	--	--	--	--	--	--	--	--	--	--	--	-	-	-
Unigene001132	316	--	--	--	--	--	--	--	--	--	--	--	-	-	-
Unigene001133	308	--	--	--	--	--	--	--	--	--	--	--	-	-	-
Unigene001134	607	AT2G27110.3	FAR1-related sequence 3|Chr2:11576969-11580259 REVERSE LENGTH=706	XP_017233220.1	PREDICTED: protein FAR1-RELATED SEQUENCE 1-like [Daucus carota subsp. sativus]	sp|Q9ZVC9|FRS3_ARATH	Protein FAR1-RELATED SEQUENCE 3 OS=Arabidopsis thaliana GN=FRS3 PE=2 SV=2	--	--	--	--	--	-	-	-
Unigene001135	301	AT1G47670.1	Transmembrane amino acid transporter family protein|Chr1:17536834-17539486 REVERSE LENGTH=519	KVI04020.1	Amino acid transporter, transmembrane [Cynara cardunculus var. scolymus]	sp|Q9SX98|LHTL8_ARATH	Lysine histidine transporter-like 8 OS=Arabidopsis thaliana GN=AATL1 PE=1 SV=1	At1g47670	KOG1303	Amino acid transporters	--	--	-	-	GO:0016020//membrane;GO:0044425//membrane part;GO:0031224//intrinsic component of membrane
Unigene001136	456	AT4G39952.1	Pentatricopeptide repeat (PPR) superfamily protein|Chr4:18527680-18530007 FORWARD LENGTH=775	KVI03207.1	Pentatricopeptide repeat-containing protein [Cynara cardunculus var. scolymus]	sp|Q3E9N1|PP359_ARATH	Pentatricopeptide repeat-containing protein At4g39952, mitochondrial OS=Arabidopsis thaliana GN=PCMP-E98 PE=2 SV=2	At5g04780_1	KOG4197	FOG: PPR repeat	--	--	-	-	-
Unigene001137	425	AT1G16120.1	wall associated kinase-like 1|Chr1:5522639-5524983 FORWARD LENGTH=730	KVH92007.1	Concanavalin A-like lectin/glucanase, subgroup [Cynara cardunculus var. scolymus]	sp|Q9S9M5|WAKLA_ARATH	Wall-associated receptor kinase-like 1 OS=Arabidopsis thaliana GN=WAKL1 PE=2 SV=1	At4g31110	KOG1187	Serine/threonine protein kinase	K04733//interleukin-1 receptor-associated kinase 4 [EC:2.7.11.1]	vvi:100247558	-	-	-
Unigene001138	213	--	--	--	--	--	--	--	--	--	--	--	-	-	-
Unigene001139	420	--	--	--	--	--	--	--	--	--	--	--	-	-	-
Unigene001140	510	--	--	--	--	--	--	--	--	--	--	--	-	-	-
Unigene001141	366	--	--	--	--	--	--	--	--	--	--	--	-	-	-
Unigene001142	210	--	--	CDY34254.1	BnaA01g24710D [Brassica napus]	--	--	--	--	--	--	--	-	-	-
Unigene001143	1091	AT5G49060.2	DnaJ heat shock amino-terminal domain protein (DUF1977)|Chr5:19886764-19888136 FORWARD LENGTH=354	XP_010494260.1	PREDICTED: chaperone protein dnaJ 49-like [Camelina sativa]	sp|Q9FH28|DNJ49_ARATH	Chaperone protein dnaJ 49 OS=Arabidopsis thaliana GN=ATJ49 PE=2 SV=2	At5g49060	KOG0714	Molecular chaperone (DnaJ superfamily)	K09518//DnaJ homolog subfamily B member 12	pmum:103323022	-	-	-
Unigene001144	212	AT4G15000.1	Ribosomal L27e protein family|Chr4:8571896-8572303 FORWARD LENGTH=135	XP_014531062.1	60S ribosomal protein L27 [Penicillium digitatum Pd1]// EKV08347.1 60S ribosomal protein L27 [Penicillium digitatum Pd1]	sp|P0C2H7|RL27B_YEAST	60S ribosomal protein L27-B OS=Saccharomyces cerevisiae (strain ATCC 204508 / S288c) GN=RPL27B PE=1 SV=1	YDR471w	KOG3418	60S ribosomal protein L27	K02901//large subunit ribosomal protein L27e	gsl:Gasu_38060	GO:0010467//gene expression;GO:0044238//primary metabolic process;GO:0044249//cellular biosynthetic process;GO:0044267//cellular protein metabolic process;GO:0009058//biosynthetic process;GO:0044237//cellular metabolic process;GO:0044260//cellular macromolecule metabolic process;GO:0009059//macromolecule biosynthetic process;GO:1901576//organic substance biosynthetic process;GO:0071704//organic s…	GO:0005198//structural molecule activity	GO:0044446//intracellular organelle part;GO:0005622//intracellular;GO:0030684//preribosome;GO:0044424//intracellular part;GO:0044444//cytoplasmic part;GO:0043226//organelle;GO:0030529//intracellular ribonucleoprotein complex;GO:0005840//ribosome;GO:0005623//cell;GO:0005737//cytoplasm;GO:0044422//organelle part;GO:0032991//macromolecular complex;GO:1990904//ribonucleoprotein complex;GO:0043229//in…
Unigene001145	372	AT2G32220.1	Ribosomal L27e protein family|Chr2:13678945-13679352 FORWARD LENGTH=135	KLU91107.1	60S ribosomal protein L27-A [Magnaporthiopsis poae ATCC 64411]	sp|O14388|RL27A_SCHPO	60S ribosomal protein L27-A OS=Schizosaccharomyces pombe (strain 972 / ATCC 24843) GN=rpl2701 PE=2 SV=2	SPBC685.07c	KOG3418	60S ribosomal protein L27	K02901//large subunit ribosomal protein L27e	gsl:Gasu_38060	GO:0010467//gene expression;GO:0008152//metabolic process;GO:0043170//macromolecule metabolic process;GO:0071704//organic substance metabolic process	-	GO:0005623//cell;GO:1990904//ribonucleoprotein complex;GO:0032991//macromolecular complex;GO:0030529//intracellular ribonucleoprotein complex;GO:0044464//cell part;GO:0044424//intracellular part;GO:0005622//intracellular
Unigene001146	315	--	--	--	--	--	--	--	--	--	--	--	-	-	-
Unigene001147	365	AT4G23160.3	cysteine-rich RECEPTOR-like kinase|Chr4:12129485-12133157 FORWARD LENGTH=1043	BAK64102.1	gag-pol polyprotein [Eustoma exaltatum subsp. russellianum]	sp|P04146|COPIA_DROME	Copia protein OS=Drosophila melanogaster GN=GIP PE=1 SV=3	At2g16670	KOG0017	FOG: Transposon-encoded proteins with TYA, reverse transcriptase, integrase domains in various combinations	--	--	-	-	-
Unigene001148	291	AT4G10710.2	global transcription factor C|Chr4:6602226-6605450 REVERSE LENGTH=1074	JAT44520.1	FACT complex subunit SPT16, partial [Anthurium amnicola]// JAT55480.1 FACT complex subunit SPT16, partial [Anthurium amnicola]// JAT66745.1 FACT complex subunit SPT16, partial [Anthurium amnicola]	sp|Q7X923|SPT16_ORYSJ	FACT complex subunit SPT16 OS=Oryza sativa subsp. japonica GN=SPT16 PE=2 SV=2	At4g10710	KOG1189	Global transcriptional regulator, cell division control protein	--	--	-	-	-
Unigene001149	327	AT4G10710.2	global transcription factor C|Chr4:6602226-6605450 REVERSE LENGTH=1074	JAT44520.1	FACT complex subunit SPT16, partial [Anthurium amnicola]// JAT55480.1 FACT complex subunit SPT16, partial [Anthurium amnicola]// JAT66745.1 FACT complex subunit SPT16, partial [Anthurium amnicola]	sp|O82491|SPT16_ARATH	FACT complex subunit SPT16 OS=Arabidopsis thaliana GN=SPT16 PE=1 SV=1	At4g10710	KOG1189	Global transcriptional regulator, cell division control protein	--	--	-	-	-
Unigene001150	485	AT1G69440.1	Argonaute family protein|Chr1:26101565-26105016 REVERSE LENGTH=990	KVH97723.1	Argonaute/Dicer protein, PAZ [Cynara cardunculus var. scolymus]	sp|Q9C793|AGO7_ARATH	Protein argonaute 7 OS=Arabidopsis thaliana GN=AGO7 PE=2 SV=1	At1g69440	KOG1041	Translation initiation factor 2C (eIF-2C) and related proteins	K11593//eukaryotic translation initiation factor 2C	tcc:TCM_011631	-	-	-
Unigene001151	412	--	--	--	--	--	--	--	--	--	--	--	-	-	-
Unigene001152	446	--	--	--	--	--	--	--	--	--	--	--	-	-	-
Unigene001153	637	--	--	--	--	--	--	--	--	--	--	--	-	-	-
Unigene001154	258	AT4G24610.3	pesticidal crystal cry8Ba protein|Chr4:12700837-12707899 REVERSE LENGTH=1154	OMO50696.1	Phosphoglucose isomerase (PGI) [Corchorus capsularis]	--	--	--	--	--	--	--	-	-	-
Unigene001155	472	--	--	--	--	--	--	--	--	--	--	--	-	-	-
Unigene001156	215	--	--	--	--	--	--	--	--	--	--	--	-	-	-
Unigene001157	213	AT1G19640.1	jasmonic acid carboxyl methyltransferase|Chr1:6789166-6791708 REVERSE LENGTH=389	XP_017636680.1	PREDICTED: salicylate carboxymethyltransferase-like [Gossypium arboreum]	sp|Q9SPV4|SAMT_CLABR	Salicylate carboxymethyltransferase OS=Clarkia breweri GN=SAMT PE=1 SV=1	--	--	--	K08241//jasmonate O-methyltransferase [EC:2.1.1.141]	gmx:100813166	GO:0008152//metabolic process	GO:0003824//catalytic activity	-
Unigene001158	265	AT1G19640.1	jasmonic acid carboxyl methyltransferase|Chr1:6789166-6791708 REVERSE LENGTH=389	ANB66349.1	salicylic acid carboxyl methyltransferase [Camellia sinensis]	sp|Q9SPV4|SAMT_CLABR	Salicylate carboxymethyltransferase OS=Clarkia breweri GN=SAMT PE=1 SV=1	--	--	--	K08241//jasmonate O-methyltransferase [EC:2.1.1.141]	tcc:TCM_000324	GO:0008152//metabolic process	GO:0003824//catalytic activity	-
Unigene001159	515	AT1G59820.1	aminophospholipid ATPase 3|Chr1:22011599-22020023 FORWARD LENGTH=1213	XP_017222810.1	PREDICTED: phospholipid-transporting ATPase 3 [Daucus carota subsp. sativus]	sp|Q9XIE6|ALA3_ARATH	Phospholipid-transporting ATPase 3 OS=Arabidopsis thaliana GN=ALA3 PE=1 SV=2	At1g59820	KOG0206	P-type ATPase	K14802//phospholipid-transporting ATPase [EC:3.6.3.1]	jcu:105649807	-	-	-
Unigene001160	632	AT3G02645.1	transmembrane protein%2C putative (DUF247)|Chr3:566271-567860 FORWARD LENGTH=529	GAV70919.1	DUF247 domain-containing protein [Cephalotus follicularis]	sp|Q9SD53|Y3720_ARATH	UPF0481 protein At3g47200 OS=Arabidopsis thaliana GN=At3g47200 PE=2 SV=1	--	--	--	--	--	-	-	GO:0044425//membrane part;GO:0031224//intrinsic component of membrane;GO:0016020//membrane
Unigene001161	492	AT3G57450.1	hypothetical protein|Chr3:21262028-21262318 FORWARD LENGTH=96	XP_017256419.1	PREDICTED: B3 domain-containing transcription factor VRN1-like [Daucus carota subsp. sativus]	--	--	--	--	--	--	--	-	-	-
Unigene001162	488	AT2G24260.2	LJRHL1-like 1|Chr2:10319646-10321803 REVERSE LENGTH=247	KVH88848.1	Myc-type, basic helix-loop-helix (bHLH) domain-containing protein [Cynara cardunculus var. scolymus]	sp|Q9ZUG9|BH066_ARATH	Transcription factor bHLH66 OS=Arabidopsis thaliana GN=BHLH66 PE=2 SV=1	--	--	--	--	--	-	-	-
Unigene001163	676	--	--	--	--	--	--	--	--	--	--	--	-	-	-
Unigene001164	258	--	--	--	--	--	--	--	--	--	--	--	-	-	-
Unigene001165	274	--	--	--	--	--	--	--	--	--	--	--	-	-	-
Unigene001166	234	--	--	--	--	--	--	--	--	--	--	--	-	-	-
Unigene001167	393	--	--	--	--	--	--	--	--	--	--	--	-	-	-
Unigene001168	277	--	--	--	--	--	--	--	--	--	--	--	-	-	-
Unigene001169	332	--	--	--	--	--	--	--	--	--	--	--	-	-	-
Unigene001170	571	--	--	OMO87331.1	Integrase, catalytic core [Corchorus capsularis]	sp|Q9UR07|TF211_SCHPO	Transposon Tf2-11 polyprotein OS=Schizosaccharomyces pombe (strain 972 / ATCC 24843) GN=Tf2-11 PE=3 SV=1	At4g07830	KOG0017	FOG: Transposon-encoded proteins with TYA, reverse transcriptase, integrase domains in various combinations	--	--	-	-	-
Unigene001171	314	--	--	--	--	--	--	--	--	--	--	--	-	-	-
Unigene001172	511	--	--	--	--	--	--	--	--	--	--	--	-	-	-
Unigene001173	448	AT5G65165.1	succinate dehydrogenase 2-3|Chr5:26034515-26035922 REVERSE LENGTH=309	KEQ84146.1	mitochondrial succinate dehydrogenase subunit B [Aureobasidium pullulans EXF-150]// KEQ84146.1 mitochondrial succinate dehydrogenase subunit B [Aureobasidium pullulans EXF-150]	sp|O42772|SDHB_ZYMTR	Succinate dehydrogenase [ubiquinone] iron-sulfur subunit, mitochondrial OS=Zymoseptoria tritici GN=SDH2 PE=3 SV=1	YLL041c	KOG3049	Succinate dehydrogenase, Fe-S protein subunit	K00235//succinate dehydrogenase (ubiquinone) iron-sulfur subunit [EC:1.3.5.1]	atr:18442000	GO:0009987//cellular process;GO:0071704//organic substance metabolic process;GO:0044281//small molecule metabolic process;GO:0044237//cellular metabolic process;GO:0044699//single-organism process;GO:0019752//carboxylic acid metabolic process;GO:0044710//single-organism metabolic process;GO:0006101//citrate metabolic process;GO:0008152//metabolic process;GO:0006082//organic acid metabolic process…	GO:0005488//binding;GO:0016491//oxidoreductase activity;GO:0016627//oxidoreductase activity, acting on the CH-CH group of donors;GO:0043167//ion binding;GO:0051536//iron-sulfur cluster binding;GO:0003824//catalytic activity;GO:0051540//metal cluster binding;GO:0043169//cation binding;GO:0000104//succinate dehydrogenase activity	GO:0044446//intracellular organelle part;GO:0044424//intracellular part;GO:0031975//envelope;GO:0031090//organelle membrane;GO:0044422//organelle part;GO:0016020//membrane;GO:0019866//organelle inner membrane;GO:0043229//intracellular organelle;GO:0005623//cell;GO:0031967//organelle envelope;GO:0044464//cell part;GO:0005622//intracellular;GO:0043227//membrane-bounded organelle;GO:0043226//organel…
Unigene001174	208	--	--	--	--	--	--	--	--	--	--	--	-	-	-
Unigene001175	266	--	--	--	--	--	--	--	--	--	--	--	-	-	-
Unigene001176	211	--	--	--	--	--	--	--	--	--	--	--	-	-	-
Unigene001177	267	--	--	--	--	--	--	--	--	--	--	--	-	-	-
Unigene001178	356	--	--	--	--	--	--	--	--	--	--	--	-	-	-
Unigene001179	243	--	--	--	--	--	--	--	--	--	--	--	-	-	-
Unigene001180	379	AT3G48430.1	relative of early flowering 6|Chr3:17935609-17940456 FORWARD LENGTH=1360	EKC98153.1	DNA-binding protein cre-1 [Trichosporon asahii var. asahii CBS 8904]	sp|Q01981|CREA_EMENI	DNA-binding protein creA OS=Emericella nidulans (strain FGSC A4 / ATCC 38163 / CBS 112.46 / NRRL 194 / M139) GN=creA PE=1 SV=1	SPBC1D7.02	KOG1721	FOG: Zn-finger	--	--	-	GO:0005488//binding;GO:0043169//cation binding;GO:0043167//ion binding;GO:0003676//nucleic acid binding;GO:0097159//organic cyclic compound binding;GO:1901363//heterocyclic compound binding	-
Unigene001181	203	AT2G36770.1	UDP-Glycosyltransferase superfamily protein|Chr2:15415227-15416717 REVERSE LENGTH=496	KVH90497.1	UDP-glucuronosyl/UDP-glucosyltransferase [Cynara cardunculus var. scolymus]	sp|Q9ZQ97|U73C4_ARATH	UDP-glycosyltransferase 73C4 OS=Arabidopsis thaliana GN=UGT73C4 PE=2 SV=1	At2g36770	KOG1192	UDP-glucuronosyl and UDP-glucosyl transferase	K13496//UDP-glucosyl transferase 73C [EC:2.4.1.-]	tcc:TCM_030167	-	GO:0016757//transferase activity, transferring glycosyl groups;GO:0016740//transferase activity;GO:0003824//catalytic activity	-
Unigene001182	553	AT1G29290.1	B-cell lymphoma 6 protein|Chr1:10245055-10245378 FORWARD LENGTH=107	CDY36958.1	BnaC09g17740D [Brassica napus]	--	--	--	--	--	--	--	-	-	-
Unigene001183	631	AT1G29290.1	B-cell lymphoma 6 protein|Chr1:10245055-10245378 FORWARD LENGTH=107	CDY36958.1	BnaC09g17740D [Brassica napus]	--	--	--	--	--	--	--	-	-	-
Unigene001184	457	--	--	--	--	--	--	--	--	--	--	--	-	-	-
Unigene001185	408	AT4G23160.3	cysteine-rich RECEPTOR-like kinase|Chr4:12129485-12133157 FORWARD LENGTH=1043	KYP77128.1	Retrovirus-related Pol polyprotein from transposon TNT 1-94 [Cajanus cajan]	sp|P92519|M810_ARATH	Uncharacterized mitochondrial protein AtMg00810 OS=Arabidopsis thaliana GN=AtMg00810 PE=4 SV=1	At2g24660	KOG0017	FOG: Transposon-encoded proteins with TYA, reverse transcriptase, integrase domains in various combinations	--	--	-	-	-
Unigene001186	550	--	--	--	--	--	--	--	--	--	--	--	-	-	-
Unigene001187	392	--	--	--	--	--	--	--	--	--	--	--	-	-	-
Unigene001188	406	--	--	--	--	--	--	--	--	--	--	--	-	-	-
Unigene001189	389	--	--	--	--	--	--	--	--	--	--	--	-	-	-
Unigene001190	322	--	--	--	--	--	--	--	--	--	--	--	-	-	-
Unigene001191	623	--	--	--	--	--	--	--	--	--	--	--	-	-	-
Unigene001192	684	--	--	--	--	--	--	--	--	--	--	--	-	-	-
Unigene001193	480	AT2G32060.3	Ribosomal protein L7Ae/L30e/S12e/Gadd45 family protein|Chr2:13639228-13640104 REVERSE LENGTH=144	KEQ84745.1	40S ribosomal protein S12 [Aureobasidium pullulans EXF-150]	sp|O59936|RS12_BLUGH	40S ribosomal protein S12 OS=Blumeria graminis f. sp. hordei GN=RPS12 PE=3 SV=1	SPCC962.04	KOG3406	40S ribosomal protein S12	K02951//small subunit ribosomal protein S12e	bdi:100823604	GO:0051179//localization;GO:0051641//cellular localization;GO:0051234//establishment of localization;GO:0051649//establishment of localization in cell;GO:0046907//intracellular transport;GO:0071704//organic substance metabolic process;GO:0010467//gene expression;GO:0006810//transport;GO:0051169//nuclear transport;GO:0008152//metabolic process;GO:0043170//macromolecule metabolic process	GO:0005198//structural molecule activity	GO:0005737//cytoplasm;GO:0044444//cytoplasmic part;GO:1990904//ribonucleoprotein complex;GO:0044422//organelle part;GO:0043228//non-membrane-bounded organelle;GO:0005840//ribosome;GO:0043232//intracellular non-membrane-bounded organelle;GO:0005623//cell;GO:0030529//intracellular ribonucleoprotein complex;GO:0015935//small ribosomal subunit;GO:0044446//intracellular organelle part;GO:0043226//orga…
Unigene001194	459	--	--	--	--	--	--	--	--	--	--	--	-	-	-
Unigene001195	528	--	--	--	--	--	--	--	--	--	--	--	-	-	-
Unigene001196	208	--	--	--	--	--	--	--	--	--	--	--	-	-	-
Unigene001197	224	--	--	KVH92642.1	Armadillo-like helical, partial [Cynara cardunculus var. scolymus]	--	--	--	--	--	K10691//E3 ubiquitin-protein ligase UBR4 [EC:2.3.2.27]	vvi:100256705	-	-	-
Unigene001198	346	--	--	--	--	--	--	--	--	--	--	--	-	-	-
Unigene001199	364	--	--	--	--	--	--	--	--	--	--	--	-	-	-
Unigene001200	217	--	--	--	--	--	--	--	--	--	--	--	-	-	-
Unigene001201	286	--	--	--	--	--	--	--	--	--	--	--	-	-	-
Unigene001202	489	--	--	--	--	--	--	--	--	--	--	--	-	-	-
Unigene001203	532	--	--	--	--	--	--	--	--	--	--	--	-	-	-
Unigene001204	304	--	--	--	--	--	--	--	--	--	--	--	-	-	-
Unigene001205	324	--	--	--	--	--	--	--	--	--	--	--	-	-	-
Unigene001206	300	AT3G26570.1	phosphate transporter 2%3B1|Chr3:9756261-9758413 FORWARD LENGTH=613	XP_001838448.1	sodium:inorganic phosphate symporter [Coprinopsis cinerea okayama7#130]// EAU83382.1 sodium:inorganic phosphate symporter [Coprinopsis cinerea okayama7#130]	sp|P38361|PHO89_YEAST	Phosphate permease PHO89 OS=Saccharomyces cerevisiae (strain ATCC 204508 / S288c) GN=PHO89 PE=1 SV=1	YBR296c	KOG2493	Na+/Pi symporter	K14640//solute carrier family 20 (sodium-dependent phosphate transporter)	cre:CHLREDRAFT_196335	GO:0009987//cellular process;GO:0044763//single-organism cellular process;GO:0006810//transport;GO:0006811//ion transport;GO:0006820//anion transport;GO:0051234//establishment of localization;GO:0044699//single-organism process;GO:0006817//phosphate ion transport;GO:0015698//inorganic anion transport;GO:0051179//localization	GO:0005215//transporter activity;GO:0015291//secondary active transmembrane transporter activity;GO:0015075//ion transmembrane transporter activity;GO:0008509//anion transmembrane transporter activity;GO:0015114//phosphate ion transmembrane transporter activity;GO:0015103//inorganic anion transmembrane transporter activity;GO:0022892//substrate-specific transporter activity;GO:0022804//active tra…	GO:0016020//membrane
Unigene001207	221	--	--	--	--	--	--	--	--	--	--	--	-	-	-
Unigene001208	210	--	--	--	--	--	--	--	--	--	--	--	-	-	-
Unigene001209	554	--	--	--	--	--	--	--	--	--	--	--	-	-	-
Unigene001210	232	--	--	--	--	--	--	--	--	--	--	--	-	-	-
Unigene001211	240	AT3G15095.1	Serine/Threonine-kinase pakA-like protein|Chr3:5081996-5084050 FORWARD LENGTH=684	XP_015164603.1	PREDICTED: pinin-like [Solanum tuberosum]	--	--	--	--	--	--	--	-	-	-
Unigene001212	538	--	--	--	--	--	--	--	--	--	--	--	-	-	-
Unigene001213	723	--	--	--	--	--	--	--	--	--	--	--	-	-	-
Unigene001214	2015	--	--	JAT67187.1	Activating transcription factor of chaperone, partial [Anthurium amnicola]	sp|Q9GPH3|ATFC_BOMMO	Activating transcription factor of chaperone OS=Bombyx mori GN=ATFC PE=2 SV=1	7298780	KOG4571	Activating transcription factor 4	--	--	-	-	-
Unigene001215	368	--	--	--	--	--	--	--	--	--	--	--	-	-	-
Unigene001216	917	--	--	JAT41280.1	HERV-K_6q14.1 provirus ancestral Gag-Pol polyprotein, partial [Anthurium amnicola]	--	--	At3g31970	KOG0017	FOG: Transposon-encoded proteins with TYA, reverse transcriptase, integrase domains in various combinations	--	--	-	-	-
Unigene001217	882	AT4G15560.1	Deoxyxylulose-5-phosphate synthase|Chr4:8884218-8887254 FORWARD LENGTH=717	AMB19703.1	1-deoxy-d-xylulose-5-phosphate synthase 1 [Taraxacum kok-saghyz]	sp|Q6YU51|DXS2_ORYSJ	Probable 1-deoxy-D-xylulose-5-phosphate synthase 2, chloroplastic OS=Oryza sativa subsp. japonica GN=Os07g0190000 PE=2 SV=1	At4g15560	KOG0523	Transketolase	K01662//1-deoxy-D-xylulose-5-phosphate synthase [EC:2.2.1.7]	jcu:105641710	-	-	-
Unigene001218	284	--	--	--	--	--	--	--	--	--	--	--	-	-	-
Unigene001219	265	--	--	--	--	--	--	--	--	--	--	--	-	-	-
Unigene001220	271	AT3G15800.1	Glycosyl hydrolase superfamily protein|Chr3:5345051-5346988 FORWARD LENGTH=399	KVI06034.1	Glycoside hydrolase, catalytic domain-containing protein [Cynara cardunculus var. scolymus]	sp|Q9ZQG9|E1314_ARATH	Glucan endo-1,3-beta-glucosidase 14 OS=Arabidopsis thaliana GN=At2g27500 PE=1 SV=2	--	--	--	--	--	-	-	-
Unigene001221	439	AT3G10050.1	L-O-methylthreonine resistant 1|Chr3:3099164-3101741 REVERSE LENGTH=592	XP_008387481.1	PREDICTED: threonine dehydratase biosynthetic, chloroplastic [Malus domestica]	sp|Q9ZSS6|THD1_ARATH	Threonine dehydratase biosynthetic, chloroplastic OS=Arabidopsis thaliana GN=OMR1 PE=1 SV=1	At3g10050	KOG1250	Threonine/serine dehydratases	K01754//threonine dehydratase [EC:4.3.1.19]	mdm:103449936	-	-	-
Unigene001222	370	--	--	--	--	--	--	--	--	--	--	--	-	-	-
Unigene001223	270	--	--	--	--	--	--	--	--	--	--	--	-	-	-
Unigene001224	657	--	--	--	--	--	--	--	--	--	--	--	-	-	-
Unigene001225	1141	--	--	--	--	--	--	--	--	--	--	--	-	-	-
Unigene001226	258	--	--	--	--	--	--	--	--	--	--	--	-	-	-
Unigene001227	391	--	--	--	--	--	--	--	--	--	--	--	-	-	-
Unigene001228	403	--	--	--	--	--	--	--	--	--	--	--	-	-	-
Unigene001229	209	--	--	CDF90966.1	ZYBA0S09-01794g1_1 [Zygosaccharomyces bailii CLIB 213]// CDF90966.1 ZYBA0S09-01794g1_1 [Zygosaccharomyces bailii CLIB 213]	sp|Q5AJC0|UTR2_CANAL	Extracellular glycosidase UTR2 OS=Candida albicans (strain SC5314 / ATCC MYA-2876) GN=UTR2 PE=1 SV=1	--	--	--	--	--	GO:0044238//primary metabolic process;GO:0009987//cellular process;GO:0071704//organic substance metabolic process;GO:0071554//cell wall organization or biogenesis;GO:0016043//cellular component organization;GO:0071840//cellular component organization or biogenesis;GO:0071555//cell wall organization;GO:0045229//external encapsulating structure organization;GO:0008152//metabolic process	GO:0016787//hydrolase activity;GO:0003824//catalytic activity;GO:0016798//hydrolase activity, acting on glycosyl bonds	GO:0005618//cell wall;GO:0009277//fungal-type cell wall;GO:0044464//cell part;GO:0030312//external encapsulating structure;GO:0071944//cell periphery;GO:0005623//cell
Unigene001230	259	AT4G32300.1	S-domain-2 5|Chr4:15599970-15602435 FORWARD LENGTH=821	KVH90279.1	Apple-like protein [Cynara cardunculus var. scolymus]	sp|Q8RWZ5|SD25_ARATH	G-type lectin S-receptor-like serine/threonine-protein kinase SD2-5 OS=Arabidopsis thaliana GN=SD25 PE=1 SV=1	At1g49270	KOG1187	Serine/threonine protein kinase	--	--	-	-	-
Unigene001231	457	AT3G48290.1	cytochrome P450%2C family 71%2C subfamily A%2C polypeptide 24|Chr3:17882590-17884134 FORWARD LENGTH=488	KVH96883.1	cytochrome P450 [Cynara cardunculus var. scolymus]	sp|H2DH18|C7A12_PANGI	Cytochrome P450 CYP736A12 OS=Panax ginseng PE=2 SV=1	At4g36220	KOG0156	Cytochrome P450 CYP2 subfamily	--	--	-	-	-
Unigene001232	206	--	--	--	--	--	--	--	--	--	--	--	-	-	-
Unigene001233	206	--	--	KYP63095.1	LINE-1 reverse transcriptase isogeny [Cajanus cajan]	--	--	At2g17610	KOG1075	FOG: Reverse transcriptase	--	--	-	-	-
Unigene001234	423	--	--	GAV64656.1	UBN2 domain-containing protein, partial [Cephalotus follicularis]	--	--	At3g60170	KOG0017	FOG: Transposon-encoded proteins with TYA, reverse transcriptase, integrase domains in various combinations	--	--	-	-	-
Unigene001235	238	--	--	--	--	--	--	--	--	--	--	--	-	-	-
Unigene001236	363	--	--	--	--	--	--	--	--	--	--	--	-	-	-
Unigene001237	289	--	--	KVI03059.1	Homeodomain-like protein [Cynara cardunculus var. scolymus]	--	--	--	--	--	--	--	-	-	-
Unigene001238	464	--	--	--	--	--	--	--	--	--	--	--	-	-	-
Unigene001239	636	--	--	--	--	--	--	--	--	--	--	--	-	-	-
Unigene001240	306	--	--	--	--	--	--	--	--	--	--	--	-	-	-
Unigene001241	257	AT5G11290.2	transmembrane protein%2C putative (DUF247)|Chr5:3598959-3600227 FORWARD LENGTH=422	CDX87088.1	BnaC09g04030D [Brassica napus]	--	--	--	--	--	--	--	-	-	-
Unigene001242	356	--	--	--	--	--	--	--	--	--	--	--	-	-	-
Unigene001243	220	--	--	--	--	--	--	--	--	--	--	--	-	-	-
Unigene001244	250	--	--	--	--	--	--	--	--	--	--	--	-	-	-
Unigene001245	205	--	--	--	--	--	--	--	--	--	--	--	-	-	-
Unigene001246	237	--	--	--	--	--	--	--	--	--	--	--	-	-	-
Unigene001247	227	AT5G60760.2	P-loop containing nucleoside triphosphate hydrolases superfamily protein|Chr5:24440180-24442004 FORWARD LENGTH=529	XP_017185111.1	PREDICTED: P-loop NTPase domain-containing protein LPA1 homolog 1, partial [Malus domestica]	sp|Q9FJH9|LPAH1_ARATH	P-loop NTPase domain-containing protein LPA1 homolog 1 OS=Arabidopsis thaliana GN=At5g60760 PE=2 SV=1	--	--	--	--	--	-	-	-
Unigene001248	306	--	--	--	--	--	--	--	--	--	--	--	-	-	-
Unigene001249	422	AT4G12330.1	cytochrome P450%2C family 706%2C subfamily A%2C polypeptide 7|Chr4:7317776-7319658 REVERSE LENGTH=518	XP_015158826.1	PREDICTED: cytochrome P450 98A1-like, partial [Solanum tuberosum]	sp|P48418|C75A1_PETHY	Flavonoid 3',5'-hydroxylase 1 OS=Petunia hybrida GN=CYP75A1 PE=2 SV=1	At4g12330	KOG0156	Cytochrome P450 CYP2 subfamily	--	--	-	-	-
Unigene001250	206	--	--	--	--	--	--	--	--	--	--	--	-	-	-
Unigene001251	293	--	--	--	--	--	--	--	--	--	--	--	-	-	-
Unigene001252	301	--	--	--	--	--	--	--	--	--	--	--	-	-	-
Unigene001253	208	AT5G49660.1	Leucine-rich repeat transmembrane protein kinase family protein|Chr5:20161401-20164534 REVERSE LENGTH=966	XP_018823654.1	PREDICTED: receptor-like protein kinase HSL1 [Juglans regia]	sp|Q94AG2|SERK1_ARATH	Somatic embryogenesis receptor kinase 1 OS=Arabidopsis thaliana GN=SERK1 PE=1 SV=2	At3g23110	KOG0619	FOG: Leucine rich repeat	--	--	-	-	-
Unigene001254	476	--	--	--	--	--	--	--	--	--	--	--	-	-	-
Unigene001255	470	--	--	--	--	--	--	--	--	--	--	--	-	-	-
Unigene001256	639	--	--	--	--	--	--	--	--	--	--	--	-	-	-
Unigene001257	355	--	--	--	--	--	--	--	--	--	--	--	-	-	-
Unigene001258	436	AT5G09400.1	K+ uptake permease 7|Chr5:2916377-2920604 FORWARD LENGTH=858	KZV17769.1	potassium transporter 7-like [Dorcoceras hygrometricum]	sp|Q9FY75|POT7_ARATH	Potassium transporter 7 OS=Arabidopsis thaliana GN=POT7 PE=1 SV=2	--	--	--	--	--	GO:0015672//monovalent inorganic cation transport;GO:0030001//metal ion transport;GO:0006811//ion transport;GO:0006813//potassium ion transport;GO:0006810//transport;GO:0009987//cellular process;GO:1902578//single-organism localization;GO:0044763//single-organism cellular process;GO:0071804//cellular potassium ion transport;GO:0051234//establishment of localization;GO:0044699//single-organism pro…	GO:0005215//transporter activity;GO:0008324//cation transmembrane transporter activity;GO:0015075//ion transmembrane transporter activity;GO:0046873//metal ion transmembrane transporter activity;GO:0022891//substrate-specific transmembrane transporter activity;GO:0022890//inorganic cation transmembrane transporter activity;GO:0022892//substrate-specific transporter activity;GO:0022857//transmembr…	GO:0031224//intrinsic component of membrane;GO:0044425//membrane part;GO:0016020//membrane
Unigene001259	1067	--	--	--	--	--	--	--	--	--	--	--	-	-	-
Unigene001260	852	--	--	--	--	--	--	--	--	--	--	--	-	-	-
Unigene001261	373	--	--	--	--	--	--	--	--	--	--	--	-	-	-
Unigene001262	235	AT1G04870.2	protein arginine methyltransferase 10|Chr1:1373485-1375598 REVERSE LENGTH=383	XP_004287365.1	PREDICTED: protein arginine N-methyltransferase PRMT10 [Fragaria vesca subsp. vesca]	sp|A2Y953|ANM10_ORYSI	Protein arginine N-methyltransferase PRMT10 OS=Oryza sativa subsp. indica GN=PRMT10 PE=3 SV=1	At1g04870	KOG1499	Protein arginine N-methyltransferase PRMT1 and related enzymes	K11434//protein arginine N-methyltransferase 1 [EC:2.1.1.-]	fve:101309863	-	-	-
Unigene001263	205	AT5G04560.3	HhH-GPD base excision DNA repair family protein|Chr5:1310671-1318091 FORWARD LENGTH=1729	JAU68620.1	DEMETER-like protein 3, partial [Noccaea caerulescens]	sp|Q8LK56|DME_ARATH	Transcriptional activator DEMETER OS=Arabidopsis thaliana GN=DME PE=1 SV=2	--	--	--	--	--	-	-	-
Unigene001264	274	AT5G04560.3	HhH-GPD base excision DNA repair family protein|Chr5:1310671-1318091 FORWARD LENGTH=1729	KVH97096.1	DNA glycosylase [Cynara cardunculus var. scolymus]	sp|Q8LK56|DME_ARATH	Transcriptional activator DEMETER OS=Arabidopsis thaliana GN=DME PE=1 SV=2	--	--	--	--	--	-	-	-
Unigene001265	252	--	--	--	--	--	--	--	--	--	--	--	-	-	-
Unigene001266	430	--	--	KVI04081.1	Carotenoid oxygenase [Cynara cardunculus var. scolymus]	--	--	--	--	--	--	--	-	-	-
Unigene001267	239	--	--	--	--	--	--	--	--	--	--	--	-	-	-
Unigene001268	573	ATMG01250.1	RNA-directed DNA polymerase (reverse transcriptase)|ChrM:310514-310882 FORWARD LENGTH=122	KHN41454.1	LINE-1 reverse transcriptase like, partial [Glycine soja]	sp|P14381|YTX2_XENLA	Transposon TX1 uncharacterized 149 kDa protein OS=Xenopus laevis PE=3 SV=1	At2g15540	KOG1075	FOG: Reverse transcriptase	--	--	-	-	-
Unigene001269	678	--	--	--	--	--	--	--	--	--	--	--	-	-	-
Unigene001270	499	AT2G34190.1	Xanthine/uracil permease family protein|Chr2:14437065-14439407 FORWARD LENGTH=524	KVH89466.1	Xanthine/uracil/vitamin C permease, partial [Cynara cardunculus var. scolymus]	sp|Q94C70|NAT2_ARATH	Nucleobase-ascorbate transporter 2 OS=Arabidopsis thaliana GN=NAT2 PE=2 SV=2	At2g34190	KOG1292	Xanthine/uracil transporters	K14611//solute carrier family 23 (nucleobase transporter), member 1/2	bvg:104900500	GO:0044699//single-organism process;GO:0051234//establishment of localization;GO:0009987//cellular process;GO:0051179//localization;GO:0044763//single-organism cellular process	-	GO:0031224//intrinsic component of membrane;GO:0016020//membrane;GO:0044425//membrane part
Unigene001271	491	--	--	--	--	--	--	--	--	--	--	--	-	-	-
Unigene001272	215	--	--	--	--	--	--	--	--	--	--	--	-	-	-
Unigene001273	215	--	--	--	--	--	--	--	--	--	--	--	-	-	-
Unigene001274	1444	AT5G41770.1	crooked neck protein%2C putative / cell cycle protein|Chr5:16718021-16720936 FORWARD LENGTH=705	CDY49874.1	BnaA04g11400D [Brassica napus]	sp|P63155|CRNL1_RAT	Crooked neck-like protein 1 OS=Rattus norvegicus GN=Crnkl1 PE=2 SV=1	At5g41770	KOG1915	Cell cycle control protein (crooked neck)	K12869//crooked neck	cam:101503280	-	-	-
Unigene001275	277	--	--	--	--	--	--	--	--	--	--	--	-	-	-
Unigene001276	287	--	--	XP_006479637.1	PREDICTED: pentatricopeptide repeat-containing protein At3g63370, chloroplastic [Citrus sinensis]	--	--	--	--	--	--	--	-	-	-
Unigene001277	216	--	--	KVI09921.1	Acyl-CoA N-acyltransferase [Cynara cardunculus var. scolymus]	sp|Q9C776|ATE2_ARATH	Arginyl-tRNA--protein transferase 2 OS=Arabidopsis thaliana GN=ATE2 PE=2 SV=1	At3g11240	KOG1193	Arginyl-tRNA-protein transferase	K00685//arginine-tRNA-protein transferase [EC:2.3.2.8]	cit:102609591	-	-	-
Unigene001278	204	--	--	--	--	--	--	--	--	--	--	--	-	-	-
Unigene001279	363	AT3G59970.2	methylenetetrahydrofolate reductase 1|Chr3:22151303-22153989 FORWARD LENGTH=407	XP_004138970.2	PREDICTED: methylenetetrahydrofolate reductase 2 [Cucumis sativus]// KGN61503.1 Methylenetetrahydrofolate reductase [Cucumis sativus]	sp|Q9SE94|MTHR1_MAIZE	Methylenetetrahydrofolate reductase 1 OS=Zea mays PE=2 SV=1	At2g44160	KOG0564	5,10-methylenetetrahydrofolate reductase	K00297//methylenetetrahydrofolate reductase (NADPH) [EC:1.5.1.20]	csv:101216871	-	-	-
Unigene001280	320	--	--	--	--	--	--	--	--	--	--	--	-	-	-
Unigene001281	215	--	--	--	--	--	--	--	--	--	--	--	-	-	-
Unigene001282	307	--	--	--	--	--	--	--	--	--	--	--	-	-	-
Unigene001283	245	--	--	--	--	--	--	--	--	--	--	--	-	-	-
Unigene001284	284	--	--	--	--	--	--	--	--	--	--	--	-	-	-
Unigene001285	658	--	--	KHN25562.1	LINE-1 reverse transcriptase like [Glycine soja]	--	--	--	--	--	--	--	-	-	-
Unigene001286	420	AT1G69440.1	Argonaute family protein|Chr1:26101565-26105016 REVERSE LENGTH=990	KVH97723.1	Argonaute/Dicer protein, PAZ [Cynara cardunculus var. scolymus]	sp|Q9C793|AGO7_ARATH	Protein argonaute 7 OS=Arabidopsis thaliana GN=AGO7 PE=2 SV=1	At1g69440	KOG1041	Translation initiation factor 2C (eIF-2C) and related proteins	K11593//eukaryotic translation initiation factor 2C	tcc:TCM_011631	GO:0090304//nucleic acid metabolic process;GO:0051817//modification of morphology or physiology of other organism involved in symbiotic interaction;GO:0051704//multi-organism process;GO:0065007//biological regulation;GO:0046483//heterocycle metabolic process;GO:0070918//production of small RNA involved in gene silencing by RNA;GO:0065008//regulation of biological quality;GO:0044763//single-organi…	-	GO:0044464//cell part;GO:0005622//intracellular;GO:0044424//intracellular part;GO:0005623//cell
Unigene001287	909	AT5G50200.3	nitrate transmembrane transporter|Chr5:20436308-20437535 FORWARD LENGTH=210	KVI06275.1	Transporter, high affinity nitrate, Nar2 [Cynara cardunculus var. scolymus]	sp|Q9FGS5|NRT31_ARATH	High-affinity nitrate transporter 3.1 OS=Arabidopsis thaliana GN=NRT3.1 PE=1 SV=1	--	--	--	--	--	-	-	-
Unigene001288	213	AT3G15430.6	Regulator of chromosome condensation (RCC1) family protein|Chr3:5209408-5211562 FORWARD LENGTH=488	XP_010241977.1	PREDICTED: ultraviolet-B receptor UVR8-like isoform X1 [Nelumbo nucifera]	sp|Q6NRS1|IBTK_XENLA	Inhibitor of Bruton tyrosine kinase OS=Xenopus laevis GN=ibtk PE=2 SV=1	At3g15430	KOG1426	FOG: RCC1 domain	--	--	-	-	-
Unigene001289	523	AT2G42850.2	cytochrome P450%2C family 718|Chr2:17831662-17832915 FORWARD LENGTH=388	KVH89613.1	cytochrome P450, partial [Cynara cardunculus var. scolymus]	sp|Q6WG30|T5H_TAXCU	Taxadiene 5-alpha hydroxylase OS=Taxus cuspidata PE=1 SV=2	At2g42850	KOG0157	Cytochrome P450 CYP4/CYP19/CYP26 subfamilies	--	--	-	GO:0005488//binding;GO:0043167//ion binding;GO:0016491//oxidoreductase activity;GO:0046872//metal ion binding;GO:0003824//catalytic activity;GO:0043169//cation binding	GO:0016020//membrane
Unigene001290	205	--	--	--	--	--	--	--	--	--	--	--	-	-	-
Unigene001291	220	--	--	--	--	--	--	--	--	--	--	--	-	-	-
Unigene001292	245	--	--	--	--	--	--	--	--	--	--	--	-	-	-
Unigene001293	210	AT5G13690.2	alpha-N-acetylglucosaminidase family / NAGLU family|Chr5:4415808-4419376 FORWARD LENGTH=622	XP_004502129.1	PREDICTED: alpha-N-acetylglucosaminidase-like [Cicer arietinum]	sp|P54802|ANAG_HUMAN	Alpha-N-acetylglucosaminidase OS=Homo sapiens GN=NAGLU PE=1 SV=2	At5g13690	KOG2233	Alpha-N-acetylglucosaminidase	K01205//alpha-N-acetylglucosaminidase [EC:3.2.1.50]	cam:101507514	-	-	-
Unigene001294	663	AT2G16900.7	phospholipase-like protein (PEARLI 4) family protein|Chr2:7323857-7324886 REVERSE LENGTH=293	XP_009610640.1	PREDICTED: microtubule-associated protein futsch-like isoform X3 [Nicotiana tomentosiformis]	--	--	--	--	--	--	--	-	-	-
Unigene001295	446	AT5G24510.1	60S acidic ribosomal protein family|Chr5:8369295-8369866 REVERSE LENGTH=111	XP_010541757.1	PREDICTED: 60S acidic ribosomal protein P1-like [Tarenaya hassleriana]	sp|O23095|RLA12_ARATH	60S acidic ribosomal protein P1-2 OS=Arabidopsis thaliana GN=RPP1B PE=1 SV=2	At5g24510	KOG1762	60s acidic ribosomal protein P1	K02942//large subunit ribosomal protein LP1	ath:AT5G24510	-	-	GO:0005829//cytosol;GO:0005737//cytoplasm;GO:0044424//intracellular part;GO:0005623//cell;GO:0005622//intracellular;GO:0044464//cell part;GO:0030529//intracellular ribonucleoprotein complex;GO:0044444//cytoplasmic part;GO:0032991//macromolecular complex;GO:1990904//ribonucleoprotein complex
Unigene001296	323	--	--	OMP05180.1	reverse transcriptase [Corchorus capsularis]	--	--	At2g14640_2	KOG0017	FOG: Transposon-encoded proteins with TYA, reverse transcriptase, integrase domains in various combinations	--	--	-	-	-
Unigene001297	682	--	--	--	--	--	--	--	--	--	--	--	-	-	-
Unigene001298	318	--	--	--	--	--	--	--	--	--	--	--	-	-	-
Unigene001299	372	AT1G73650.2	3-oxo-5-alpha-steroid 4-dehydrogenase (DUF1295)|Chr1:27688549-27690165 REVERSE LENGTH=291	KVH95561.1	3-oxo-5-alpha-steroid 4-dehydrogenase, C-terminal [Cynara cardunculus var. scolymus]	--	--	At1g18180	KOG4650	Predicted steroid reductase	--	--	-	-	-
Unigene001300	276	AT1G73650.3	3-oxo-5-alpha-steroid 4-dehydrogenase (DUF1295)|Chr1:27688409-27690165 REVERSE LENGTH=302	KVH95561.1	3-oxo-5-alpha-steroid 4-dehydrogenase, C-terminal [Cynara cardunculus var. scolymus]	--	--	At1g18180	KOG4650	Predicted steroid reductase	--	--	-	-	-
Unigene001301	227	--	--	--	--	--	--	--	--	--	--	--	-	-	-
Unigene001302	253	--	--	--	--	--	--	--	--	--	--	--	-	-	-
Unigene001303	811	--	--	--	--	--	--	--	--	--	--	--	-	-	-
Unigene001304	339	--	--	--	--	--	--	--	--	--	--	--	-	-	-
Unigene001305	247	AT2G38760.1	annexin 3|Chr2:16201086-16202490 FORWARD LENGTH=321	EOY19973.1	Annexin [Theobroma cacao]	sp|Q9SE45|ANXD3_ARATH	Annexin D3 OS=Arabidopsis thaliana GN=ANN3 PE=2 SV=2	At2g38760	KOG0819	Annexin	--	--	-	GO:0005488//binding;GO:0005543//phospholipid binding;GO:0008289//lipid binding	GO:0043229//intracellular organelle;GO:0044464//cell part;GO:0043227//membrane-bounded organelle;GO:0005623//cell;GO:0043226//organelle;GO:0005622//intracellular;GO:0043231//intracellular membrane-bounded organelle;GO:0044424//intracellular part
Unigene001306	443	--	--	--	--	--	--	--	--	--	--	--	-	-	-
Unigene001307	258	--	--	--	--	--	--	--	--	--	--	--	-	-	-
Unigene001308	351	--	--	--	--	--	--	--	--	--	--	--	-	-	-
Unigene001309	206	--	--	--	--	--	--	--	--	--	--	--	-	-	-
Unigene001310	252	--	--	--	--	--	--	--	--	--	--	--	-	-	-
Unigene001311	382	--	--	--	--	--	--	--	--	--	--	--	-	-	-
Unigene001312	395	AT3G58690.1	Protein kinase superfamily protein|Chr3:21709369-21711246 FORWARD LENGTH=400	XP_015080926.1	PREDICTED: serine/threonine-protein kinase CDL1 [Solanum pennellii]	--	--	At3g58690	KOG1187	Serine/threonine protein kinase	--	--	-	-	-
Unigene001313	294	--	--	--	--	--	--	--	--	--	--	--	-	-	-
Unigene001314	247	--	--	--	--	--	--	--	--	--	--	--	-	-	-
Unigene001315	324	AT5G20480.2	EF-TU receptor|Chr5:6922497-6925679 FORWARD LENGTH=1031	KVI09920.1	Leucine-rich repeat-containing protein [Cynara cardunculus var. scolymus]	sp|C0LGT6|EFR_ARATH	LRR receptor-like serine/threonine-protein kinase EFR OS=Arabidopsis thaliana GN=EFR PE=1 SV=1	At2g42800	KOG0619	FOG: Leucine rich repeat	--	--	-	-	-
Unigene001316	207	--	--	--	--	--	--	--	--	--	--	--	-	-	-
Unigene001317	543	--	--	--	--	--	--	--	--	--	--	--	-	-	-
Unigene001318	1475	AT1G12860.1	basic helix-loop-helix (bHLH) DNA-binding superfamily protein|Chr1:4384758-4386392 FORWARD LENGTH=450	KVH98103.1	Myc-type, basic helix-loop-helix (bHLH) domain-containing protein, partial [Cynara cardunculus var. scolymus]	sp|Q9LSE2|ICE1_ARATH	Transcription factor ICE1 OS=Arabidopsis thaliana GN=SCRM PE=1 SV=1	--	--	--	--	--	-	-	-
Unigene001319	376	AT2G36380.1	pleiotropic drug resistance 6|Chr2:15257583-15263627 FORWARD LENGTH=1453	ENH62079.1	ABC transporter G family member 14 [Fusarium oxysporum f. sp. cubense race 1]	sp|Q556W2|ABCGH_DICDI	ABC transporter G family member 17 OS=Dictyostelium discoideum GN=abcG17-1 PE=3 SV=1	YDR406w	KOG0065	Pleiotropic drug resistance proteins (PDR1-15), ABC superfamily	--	--	-	-	-
Unigene001320	260	--	--	--	--	--	--	--	--	--	--	--	-	-	-
Unigene001321	588	AT3G25270.1	Ribonuclease H-like superfamily protein|Chr3:9203934-9204965 REVERSE LENGTH=343	KVH96764.1	Endonuclease/exonuclease/phosphatase [Cynara cardunculus var. scolymus]	--	--	At3g25270	KOG1075	FOG: Reverse transcriptase	--	--	-	-	-
Unigene001322	225	--	--	--	--	--	--	--	--	--	--	--	-	-	-
Unigene001323	454	AT1G22840.1	CYTOCHROME C-1|Chr1:8079384-8080286 FORWARD LENGTH=114	XP_006459685.1	CytC2 cytochrome C protein [Agaricus bisporus var. bisporus H97]// XP_007330776.1 Cythochrome C [Agaricus bisporus var. burnettii JB137-S8]// EKM79025.1 Cythochrome C [Agaricus bisporus var. burnettii JB137-S8]	sp|P00049|CYC_USTSP	Cytochrome c OS=Ustilago sphaerogena PE=1 SV=1	SPCC191.07	KOG3453	Cytochrome c	K08738//cytochrome c	cme:CYME_CMJ212C	GO:0019693//ribose phosphate metabolic process;GO:0009126//purine nucleoside monophosphate metabolic process;GO:0055086//nucleobase-containing small molecule metabolic process;GO:0044237//cellular metabolic process;GO:0009144//purine nucleoside triphosphate metabolic process;GO:0009150//purine ribonucleotide metabolic process;GO:0009167//purine ribonucleoside monophosphate metabolic process;GO:00…	GO:0046906//tetrapyrrole binding;GO:0097159//organic cyclic compound binding;GO:1901363//heterocyclic compound binding;GO:0005488//binding;GO:0043167//ion binding;GO:0043169//cation binding	GO:0016020//membrane;GO:0044425//membrane part
Unigene001324	621	--	--	--	--	--	--	--	--	--	--	--	-	-	-
Unigene001325	753	--	--	--	--	--	--	--	--	--	--	--	-	-	-
Unigene001326	418	--	--	--	--	--	--	--	--	--	--	--	-	-	-
Unigene001327	469	AT1G54340.1	isocitrate dehydrogenase|Chr1:20283520-20286506 FORWARD LENGTH=416	XP_018240028.1	isocitrate dehydrogenase [NADP], mitochondrial [Fusarium oxysporum f. sp. lycopersici 4287]// XP_018240028.1 isocitrate dehydrogenase [NADP], mitochondrial [Fusarium oxysporum f. sp. lycopersici 4287]// XP_018240029.1 isocitrate dehydrogenase [NADP], mitochondrial [Fusarium oxysporum f. sp. lycopersici 4287]// XP_018240030.1 isocitrate dehydrogenase [NADP], mitochondrial [Fusarium oxysporum f. sp…	sp|O13285|IDH1_CANTR	Isocitrate dehydrogenase [NADP], mitochondrial OS=Candida tropicalis GN=IDP1 PE=3 SV=1	YDL066w	KOG1526	NADP-dependent isocitrate dehydrogenase	K00031//isocitrate dehydrogenase [EC:1.1.1.42]	vvi:100243260	GO:0044699//single-organism process;GO:0044281//small molecule metabolic process;GO:0008152//metabolic process;GO:0072350//tricarboxylic acid metabolic process;GO:0019752//carboxylic acid metabolic process;GO:0044710//single-organism metabolic process;GO:0006082//organic acid metabolic process;GO:0044237//cellular metabolic process;GO:0043436//oxoacid metabolic process;GO:0071704//organic substan…	GO:0016491//oxidoreductase activity;GO:0005488//binding;GO:0000166//nucleotide binding;GO:0043167//ion binding;GO:0004448//isocitrate dehydrogenase activity;GO:0003824//catalytic activity;GO:1901363//heterocyclic compound binding;GO:0016614//oxidoreductase activity, acting on CH-OH group of donors;GO:0097159//organic cyclic compound binding;GO:0043169//cation binding;GO:0016616//oxidoreductase ac…	-
Unigene001328	1368	--	--	--	--	--	--	--	--	--	--	--	-	-	-
Unigene001329	430	--	--	--	--	--	--	--	--	--	--	--	-	-	-
Unigene001330	241	--	--	--	--	--	--	--	--	--	--	--	-	-	-
Unigene001331	463	--	--	--	--	--	--	--	--	--	--	--	-	-	-
Unigene001332	540	--	--	--	--	--	--	--	--	--	--	--	-	-	-
Unigene001333	410	--	--	--	--	--	--	--	--	--	--	--	-	-	-
Unigene001334	213	--	--	--	--	--	--	--	--	--	--	--	-	-	-
Unigene001335	322	--	--	--	--	--	--	--	--	--	--	--	-	-	-
Unigene001336	1229	AT5G18880.1	RNA-directed DNA polymerase (reverse transcriptase)-related family protein|Chr5:6300535-6301422 REVERSE LENGTH=295	GAV92938.1	zf-RVT domain-containing protein, partial [Cephalotus follicularis]	--	--	At2g16110	KOG1075	FOG: Reverse transcriptase	--	--	-	-	-
Unigene001337	372	--	--	--	--	--	--	--	--	--	--	--	-	-	-
Unigene001338	205	--	--	--	--	--	--	--	--	--	--	--	-	-	-
Unigene001339	485	--	--	--	--	--	--	--	--	--	--	--	-	-	-
Unigene001340	251	--	--	--	--	--	--	--	--	--	--	--	-	-	-
Unigene001341	242	--	--	--	--	--	--	--	--	--	--	--	-	-	-
Unigene001342	265	--	--	--	--	--	--	--	--	--	--	--	-	-	-
Unigene001343	704	AT3G48540.1	Cytidine/deoxycytidylate deaminase family protein|Chr3:17989798-17992015 REVERSE LENGTH=232	KVH98143.1	CMP/dCMP deaminase, zinc-binding [Cynara cardunculus var. scolymus]	sp|Q5RC69|DCTD_PONAB	Deoxycytidylate deaminase OS=Pongo abelii GN=DCTD PE=2 SV=1	Hs4503277	KOG3127	Deoxycytidylate deaminase	K01493//dCMP deaminase [EC:3.5.4.12]	cit:102612998	-	-	-
Unigene001344	251	--	--	--	--	--	--	--	--	--	--	--	-	-	-
Unigene001345	892	AT5G35830.1	Ankyrin repeat family protein|Chr5:14000313-14001416 REVERSE LENGTH=282	KVH92012.1	Ankyrin repeat-containing protein [Cynara cardunculus var. scolymus]	--	--	At5g35830	KOG0504	FOG: Ankyrin repeat	--	--	-	-	-
Unigene001346	302	--	--	AAO26691.1	gag-pol polyprotein, partial [Vitis vinifera]	--	--	At4g14460	KOG0017	FOG: Transposon-encoded proteins with TYA, reverse transcriptase, integrase domains in various combinations	--	--	-	-	-
Unigene001347	1077	ATMG00220.1	apocytochrome b|ChrM:60235-61416 FORWARD LENGTH=393	YP_009092493.1	apocytochrome b (mitochondrion) [Cyanoptyche gloeocystis]// AIM52079.1 apocytochrome b (mitochondrion) [Cyanoptyche gloeocystis]	sp|Q36427|CYB_LOCMI	Cytochrome b OS=Locusta migratoria GN=MT-CYB PE=3 SV=1	DmMi013	KOG4663	Cytochrome b	K00412//ubiquinol-cytochrome c reductase cytochrome b subunit	mis:MicpuN_mit31	GO:0044699//single-organism process;GO:0044763//single-organism cellular process;GO:0044710//single-organism metabolic process;GO:0055114//oxidation-reduction process;GO:0008152//metabolic process;GO:0009987//cellular process	-	GO:0016020//membrane;GO:0044425//membrane part
Unigene001348	233	AT5G22410.1	root hair specific 18|Chr5:7426347-7427722 FORWARD LENGTH=331	XP_018479989.1	PREDICTED: probable peroxidase 26 [Raphanus sativus]	sp|O22862|PER26_ARATH	Probable peroxidase 26 OS=Arabidopsis thaliana GN=PER26 PE=2 SV=2	--	--	--	K00430//peroxidase [EC:1.11.1.7]	vvi:100257692	-	-	-
Unigene001349	862	--	--	KVI02155.1	Peptidase C26 [Cynara cardunculus var. scolymus]	--	--	--	--	--	--	--	-	-	-
Unigene001350	412	--	--	--	--	--	--	--	--	--	--	--	-	-	-
Unigene001351	225	AT3G54720.1	Peptidase M28 family protein|Chr3:20254852-20257815 REVERSE LENGTH=705	KVI09465.1	Peptidase M28 [Cynara cardunculus var. scolymus]	sp|Q9M1S8|GCP2_ARATH	Probable glutamate carboxypeptidase 2 OS=Arabidopsis thaliana GN=AMP1 PE=1 SV=3	At3g54720	KOG2195	Transferrin receptor and related proteins containing the protease-associated (PA) domain	K01301//N-acetylated-alpha-linked acidic dipeptidase [EC:3.4.17.21]	sly:101258817	-	-	-
Unigene001352	299	AT4G20520.1	RNA binding / RNA-directed DNA polymerase|Chr4:11045912-11047716 FORWARD LENGTH=376	CAA73819.1	reverse transcriptase, partial [Antirrhinum majus]	sp|P14381|YTX2_XENLA	Transposon TX1 uncharacterized 149 kDa protein OS=Xenopus laevis PE=3 SV=1	At2g01840	KOG1075	FOG: Reverse transcriptase	--	--	-	-	-
Unigene001353	495	--	--	--	--	--	--	--	--	--	--	--	-	-	-
Unigene001354	234	--	--	--	--	--	--	--	--	--	--	--	-	-	-
Unigene001355	270	--	--	--	--	--	--	--	--	--	--	--	-	-	-
Unigene001356	320	AT4G34050.1	S-adenosyl-L-methionine-dependent methyltransferases superfamily protein|Chr4:16310844-16311973 FORWARD LENGTH=259	KVI08996.1	O-methyltransferase, family 3 [Cynara cardunculus var. scolymus]	sp|Q41720|CAMT_ZINVI	Caffeoyl-CoA O-methyltransferase OS=Zinnia violacea GN=CCOAOMT PE=2 SV=1	At4g34050	KOG1663	O-methyltransferase	K00588//caffeoyl-CoA O-methyltransferase [EC:2.1.1.104]	sly:101253032	-	-	-
Unigene001357	346	AT4G34050.1	S-adenosyl-L-methionine-dependent methyltransferases superfamily protein|Chr4:16310844-16311973 FORWARD LENGTH=259	KVI08996.1	O-methyltransferase, family 3 [Cynara cardunculus var. scolymus]	sp|Q41720|CAMT_ZINVI	Caffeoyl-CoA O-methyltransferase OS=Zinnia violacea GN=CCOAOMT PE=2 SV=1	At4g34050	KOG1663	O-methyltransferase	K00588//caffeoyl-CoA O-methyltransferase [EC:2.1.1.104]	sot:102595685	-	-	-
Unigene001358	724	--	--	--	--	--	--	--	--	--	--	--	-	-	-
Unigene001359	254	--	--	--	--	--	--	--	--	--	--	--	-	-	-
Unigene001360	254	--	--	--	--	--	--	--	--	--	--	--	-	-	-
Unigene001361	565	--	--	--	--	--	--	--	--	--	--	--	-	-	-
Unigene001362	215	--	--	--	--	--	--	--	--	--	--	--	-	-	-
Unigene001363	672	--	--	--	--	--	--	--	--	--	--	--	-	-	-
Unigene001364	723	--	--	--	--	--	--	--	--	--	--	--	-	-	-
Unigene001365	402	AT5G05340.1	Peroxidase superfamily protein|Chr5:1579142-1580819 REVERSE LENGTH=324	ACZ51443.1	peroxidase protein [Mikania micrantha]	sp|P22195|PER1_ARAHY	Cationic peroxidase 1 OS=Arachis hypogaea GN=PNC1 PE=1 SV=2	--	--	--	K00430//peroxidase [EC:1.11.1.7]	egr:104430480	-	-	-
Unigene001366	650	--	--	--	--	--	--	--	--	--	--	--	-	-	-
Unigene001367	242	--	--	--	--	--	--	--	--	--	--	--	-	-	-
Unigene001368	919	AT3G29075.1	glycine-rich protein|Chr3:11051645-11052629 REVERSE LENGTH=294	ACG32088.1	pro-resilin precursor [Zea mays]	sp|Q9FKA5|Y5957_ARATH	Uncharacterized protein At5g39570 OS=Arabidopsis thaliana GN=At5g39570 PE=1 SV=1	--	--	--	--	--	-	-	-
Unigene001369	861	AT3G29075.1	glycine-rich protein|Chr3:11051645-11052629 REVERSE LENGTH=294	ACG32088.1	pro-resilin precursor [Zea mays]	sp|Q9FKA5|Y5957_ARATH	Uncharacterized protein At5g39570 OS=Arabidopsis thaliana GN=At5g39570 PE=1 SV=1	--	--	--	--	--	-	-	-
Unigene001370	339	--	--	--	--	--	--	--	--	--	--	--	-	-	-
Unigene001371	240	--	--	--	--	--	--	--	--	--	--	--	-	-	-
Unigene001372	443	--	--	--	--	--	--	--	--	--	--	--	-	-	-
Unigene001373	301	--	--	--	--	--	--	--	--	--	--	--	-	-	-
Unigene001374	509	--	--	--	--	--	--	--	--	--	--	--	-	-	-
Unigene001375	439	--	--	--	--	--	--	--	--	--	--	--	-	-	-
Unigene001376	477	--	--	CAX68207.1	Copia-like retrotransposon [Helianthus annuus]	--	--	--	--	--	--	--	-	-	-
Unigene001377	475	--	--	--	--	--	--	--	--	--	--	--	-	-	-
Unigene001378	232	--	--	--	--	--	--	--	--	--	--	--	-	-	-
Unigene001379	592	--	--	--	--	--	--	--	--	--	--	--	-	-	-
Unigene001380	815	AT1G68330.1	membrane-associated kinase regulator|Chr1:25611242-25612048 FORWARD LENGTH=268	XP_019165059.1	PREDICTED: probable membrane-associated kinase regulator 3 [Ipomoea nil]	--	--	--	--	--	--	--	-	-	-
Unigene001381	901	AT1G52190.1	Major facilitator superfamily protein|Chr1:19434671-19438673 FORWARD LENGTH=607	KVI11587.1	Major facilitator superfamily domain, general substrate transporter [Cynara cardunculus var. scolymus]	sp|Q9M817|PTR6_ARATH	Protein NRT1/ PTR FAMILY 1.2 OS=Arabidopsis thaliana GN=NPF1.2 PE=1 SV=1	At1g52190	KOG1237	H+/oligopeptide symporter	K14638//solute carrier family 15 (peptide/histidine transporter), member 3/4	cit:102626689	-	-	-
Unigene001382	1388	--	--	KVH88490.1	Toll/interleukin-1 receptor homology (TIR) domain-containing protein [Cynara cardunculus var. scolymus]	--	--	--	--	--	--	--	-	-	-
Unigene001383	809	--	--	--	--	--	--	--	--	--	--	--	-	-	-
Unigene001384	387	--	--	KVH93102.1	Extracellular ligand-binding receptor [Cynara cardunculus var. scolymus]	--	--	--	--	--	--	--	-	-	-
Unigene001385	210	--	--	--	--	--	--	--	--	--	--	--	-	-	-
Unigene001386	240	--	--	--	--	--	--	--	--	--	--	--	-	-	-
Unigene001387	429	AT4G23160.3	cysteine-rich RECEPTOR-like kinase|Chr4:12129485-12133157 FORWARD LENGTH=1043	JAU04955.1	Copia protein, partial [Noccaea caerulescens]	sp|P92519|M810_ARATH	Uncharacterized mitochondrial protein AtMg00810 OS=Arabidopsis thaliana GN=AtMg00810 PE=4 SV=1	At4g14460	KOG0017	FOG: Transposon-encoded proteins with TYA, reverse transcriptase, integrase domains in various combinations	--	--	-	-	-
Unigene001388	1095	AT4G23160.3	cysteine-rich RECEPTOR-like kinase|Chr4:12129485-12133157 FORWARD LENGTH=1043	JAU04955.1	Copia protein, partial [Noccaea caerulescens]	sp|P10978|POLX_TOBAC	Retrovirus-related Pol polyprotein from transposon TNT 1-94 OS=Nicotiana tabacum PE=2 SV=1	At1g44510	KOG0017	FOG: Transposon-encoded proteins with TYA, reverse transcriptase, integrase domains in various combinations	--	--	-	-	-
Unigene001389	315	--	--	--	--	--	--	--	--	--	--	--	-	-	-
Unigene001390	645	--	--	--	--	--	--	--	--	--	--	--	-	-	-
Unigene001391	566	--	--	--	--	--	--	--	--	--	--	--	-	-	-
Unigene001392	1663	ATMG00300.1	Gag-Pol-related retrotransposon family protein|ChrM:89617-90054 REVERSE LENGTH=145	KYP64673.1	Retrovirus-related Pol polyprotein from transposon TNT 1-94 [Cajanus cajan]	sp|P10978|POLX_TOBAC	Retrovirus-related Pol polyprotein from transposon TNT 1-94 OS=Nicotiana tabacum PE=2 SV=1	At2g07550	KOG0017	FOG: Transposon-encoded proteins with TYA, reverse transcriptase, integrase domains in various combinations	K12619//5'-3' exoribonuclease 2 [EC:3.1.13.-]	osa:4349826	-	-	-
Unigene001393	913	--	--	--	--	--	--	--	--	--	--	--	-	-	-
Unigene001394	798	--	--	--	--	--	--	--	--	--	--	--	-	-	-
Unigene001395	537	--	--	--	--	--	--	--	--	--	--	--	-	-	-
Unigene001396	241	--	--	--	--	--	--	--	--	--	--	--	-	-	-
Unigene001397	280	AT1G20230.1	Pentatricopeptide repeat (PPR) superfamily protein|Chr1:7009570-7011852 FORWARD LENGTH=760	KVI07747.1	Pentatricopeptide repeat-containing protein [Cynara cardunculus var. scolymus]	sp|Q9LNU6|PPR53_ARATH	Pentatricopeptide repeat-containing protein At1g20230 OS=Arabidopsis thaliana GN=PCMP-H21 PE=2 SV=2	At1g20230	KOG4197	FOG: PPR repeat	--	--	-	-	-
Unigene001398	464	--	--	--	--	--	--	--	--	--	--	--	-	-	-
Unigene001399	433	--	--	--	--	--	--	--	--	--	--	--	-	-	-
Unigene001400	590	--	--	--	--	--	--	--	--	--	--	--	-	-	-
Unigene001401	402	--	--	--	--	--	--	--	--	--	--	--	-	-	-
Unigene001402	247	--	--	--	--	--	--	--	--	--	--	--	-	-	-
Unigene001403	320	--	--	--	--	--	--	--	--	--	--	--	-	-	-
Unigene001404	492	--	--	XP_016652391.1	PREDICTED: NADH-ubiquinone oxidoreductase chain 2 [Prunus mume]	--	--	--	--	--	--	--	-	-	-
Unigene001405	576	--	--	--	--	--	--	--	--	--	--	--	-	-	-
Unigene001406	600	--	--	--	--	--	--	--	--	--	--	--	-	-	-
Unigene001407	670	AT5G05400.3	LRR and NB-ARC domains-containing disease resistance protein|Chr5:1597745-1599862 REVERSE LENGTH=705	OMO67975.1	Disease resistance protein [Corchorus capsularis]	sp|Q9LMP6|DRL3_ARATH	Probable disease resistance protein At1g15890 OS=Arabidopsis thaliana GN=At1g15890 PE=3 SV=2	At5g05400	KOG4658	Apoptotic ATPase	K13459//disease resistance protein RPS2	brp:103871361	-	-	-
Unigene001408	207	--	--	--	--	--	--	--	--	--	--	--	-	-	-
Unigene001409	1002	AT4G32480.1	sugar phosphate exchanger%2C putative (DUF506)|Chr4:15676488-15677776 FORWARD LENGTH=287	CDX92863.1	BnaC07g41210D [Brassica napus]	--	--	--	--	--	--	--	-	-	-
Unigene001410	686	AT4G32480.1	sugar phosphate exchanger%2C putative (DUF506)|Chr4:15676488-15677776 FORWARD LENGTH=287	CDX92863.1	BnaC07g41210D [Brassica napus]	--	--	--	--	--	--	--	-	-	-
Unigene001411	293	--	--	--	--	--	--	--	--	--	--	--	-	-	-
Unigene001412	235	--	--	--	--	--	--	--	--	--	--	--	-	-	-
Unigene001413	492	AT5G59970.2	Histone superfamily protein|Chr5:24146352-24146663 REVERSE LENGTH=103	ACG31293.1	histone H4 [Zea mays]// ACG40342.1 histone H4 [Zea mays]	sp|Q6ZXX3|H4_USTMA	Histone H4 OS=Ustilago maydis (strain 521 / FGSC 9021) GN=HHF1 PE=3 SV=4	Hs4504301	KOG3467	Histone H4	K11254//histone H4	jcu:105628184	GO:0006325//chromatin organization;GO:0043933//macromolecular complex subunit organization;GO:0071822//protein complex subunit organization;GO:0008152//metabolic process;GO:0016043//cellular component organization;GO:0071704//organic substance metabolic process;GO:0034728//nucleosome organization;GO:0043170//macromolecule metabolic process;GO:0044238//primary metabolic process;GO:0009987//cellula…	GO:0008233//peptidase activity;GO:0046983//protein dimerization activity;GO:0003676//nucleic acid binding;GO:1901363//heterocyclic compound binding;GO:0016787//hydrolase activity;GO:0097159//organic cyclic compound binding;GO:0005515//protein binding;GO:0005488//binding;GO:0003824//catalytic activity;GO:0070011//peptidase activity, acting on L-amino acid peptides	GO:0005622//intracellular;GO:0005623//cell;GO:0044464//cell part;GO:0043229//intracellular organelle;GO:0043232//intracellular non-membrane-bounded organelle;GO:0043226//organelle;GO:0043228//non-membrane-bounded organelle;GO:0043231//intracellular membrane-bounded organelle;GO:0043227//membrane-bounded organelle;GO:0044424//intracellular part
Unigene001414	342	--	--	--	--	--	--	--	--	--	--	--	-	-	-
Unigene001415	1137	--	--	--	--	--	--	--	--	--	--	--	-	-	-
Unigene001416	490	--	--	--	--	--	--	--	--	--	--	--	-	-	-
Unigene001417	1726	AT5G42830.1	HXXXD-type acyl-transferase family protein|Chr5:17176384-17177906 FORWARD LENGTH=450	KVH98309.1	Chloramphenicol acetyltransferase-like domain-containing protein [Cynara cardunculus var. scolymus]	sp|Q9SND9|Y3028_ARATH	Uncharacterized acetyltransferase At3g50280 OS=Arabidopsis thaliana GN=At3g50280 PE=3 SV=1	--	--	--	--	--	-	-	-
Unigene001418	1504	AT3G01460.1	methyl-CPG-binding domain 9|Chr3:173316-182038 FORWARD LENGTH=2176	KVH92767.1	Zinc finger, FYVE/PHD-type, partial [Cynara cardunculus var. scolymus]	sp|Q9SGH2|MBD9_ARATH	Methyl-CpG-binding domain-containing protein 9 OS=Arabidopsis thaliana GN=MBD9 PE=2 SV=1	--	--	--	--	--	-	-	-
Unigene001419	356	--	--	--	--	--	--	--	--	--	--	--	-	-	-
Unigene001420	338	--	--	--	--	--	--	--	--	--	--	--	-	-	-
Unigene001421	333	--	--	--	--	--	--	--	--	--	--	--	-	-	-
Unigene001422	279	--	--	--	--	--	--	--	--	--	--	--	-	-	-
Unigene001423	551	--	--	--	--	--	--	--	--	--	--	--	-	-	-
Unigene001424	782	--	--	--	--	--	--	--	--	--	--	--	-	-	-
Unigene001425	774	--	--	--	--	--	--	--	--	--	--	--	-	-	-
Unigene001426	1063	--	--	KVH90008.1	hypothetical protein Ccrd_007998, partial [Cynara cardunculus var. scolymus]	--	--	--	--	--	--	--	-	-	-
Unigene001427	654	--	--	KVH90008.1	hypothetical protein Ccrd_007998, partial [Cynara cardunculus var. scolymus]	--	--	--	--	--	--	--	-	-	-
Unigene001428	914	--	--	--	--	--	--	--	--	--	--	--	-	-	-
Unigene001429	275	--	--	KVI06460.1	DnaJ domain-containing protein, partial [Cynara cardunculus var. scolymus]	--	--	--	--	--	K09506//DnaJ homolog subfamily A member 5	gmx:100788305	-	-	-
Unigene001430	240	--	--	XP_015068861.1	PREDICTED: uncharacterized mitochondrial protein AtMg00810-like [Solanum pennellii]	sp|P04146|COPIA_DROME	Copia protein OS=Drosophila melanogaster GN=GIP PE=1 SV=3	At4g27210	KOG0017	FOG: Transposon-encoded proteins with TYA, reverse transcriptase, integrase domains in various combinations	--	--	-	-	-
Unigene001431	330	--	--	--	--	--	--	--	--	--	--	--	-	-	-
Unigene001432	511	--	--	--	--	--	--	--	--	--	--	--	-	-	-
Unigene001433	722	--	--	KYP63309.1	Retrovirus-related Pol polyprotein from transposon TNT 1-94 [Cajanus cajan]	sp|P10978|POLX_TOBAC	Retrovirus-related Pol polyprotein from transposon TNT 1-94 OS=Nicotiana tabacum PE=2 SV=1	At2g21310	KOG0017	FOG: Transposon-encoded proteins with TYA, reverse transcriptase, integrase domains in various combinations	K03363//cell division cycle 20, cofactor of APC complex	tcc:TCM_014797	-	GO:0005488//binding	-
Unigene001434	403	--	--	--	--	--	--	--	--	--	--	--	-	-	-
Unigene001435	423	--	--	--	--	--	--	--	--	--	--	--	-	-	-
Unigene001436	209	--	--	--	--	--	--	--	--	--	--	--	-	-	-
Unigene001437	653	AT4G23160.3	cysteine-rich RECEPTOR-like kinase|Chr4:12129485-12133157 FORWARD LENGTH=1043	JAU22115.1	Retrovirus-related Pol polyprotein from transposon TNT 1-94, partial [Noccaea caerulescens]	sp|P10978|POLX_TOBAC	Retrovirus-related Pol polyprotein from transposon TNT 1-94 OS=Nicotiana tabacum PE=2 SV=1	At5g35820	KOG0017	FOG: Transposon-encoded proteins with TYA, reverse transcriptase, integrase domains in various combinations	K01876//aspartyl-tRNA synthetase [EC:6.1.1.12]	mtr:MTR_4g052100	-	-	-
Unigene001438	231	--	--	--	--	--	--	--	--	--	--	--	-	-	-
Unigene001439	732	--	--	--	--	--	--	--	--	--	--	--	-	-	-
Unigene001440	902	--	--	--	--	--	--	--	--	--	--	--	-	-	-
Unigene001441	4072	ATCG00540.1	photosynthetic electron transfer A|ChrC:61657-62619 FORWARD LENGTH=320	AJE73867.1	cytochrome f (plastid) [Vernonia baldwinii]// AKZ22367.1 cytochrome f (plastid) [Vernonia baldwinii]	sp|Q332W5|CYF_LACSA	Cytochrome f OS=Lactuca sativa GN=petA PE=3 SV=1	--	--	--	K02634//apocytochrome f	vvi:4025050	GO:0044710//single-organism metabolic process;GO:0009987//cellular process;GO:0008152//metabolic process;GO:0044237//cellular metabolic process;GO:0044699//single-organism process	GO:0043169//cation binding;GO:0005488//binding;GO:1901363//heterocyclic compound binding;GO:0043167//ion binding;GO:0097159//organic cyclic compound binding;GO:0046906//tetrapyrrole binding	GO:0009579//thylakoid;GO:0044424//intracellular part;GO:0009507//chloroplast;GO:0044422//organelle part;GO:0005737//cytoplasm;GO:0005622//intracellular;GO:0009536//plastid;GO:0043231//intracellular membrane-bounded organelle;GO:0031224//intrinsic component of membrane;GO:0031976//plastid thylakoid;GO:0044464//cell part;GO:0016021//integral component of membrane;GO:0016020//membrane;GO:0031984//or…
Unigene001442	349	--	--	--	--	--	--	--	--	--	--	--	-	-	-
Unigene001443	566	--	--	--	--	--	--	--	--	--	--	--	-	-	-
Unigene001444	508	--	--	--	--	--	--	--	--	--	--	--	-	-	-
Unigene001445	311	--	--	--	--	--	--	--	--	--	--	--	-	-	-
Unigene001446	1524	AT4G37850.2	basic helix-loop-helix (bHLH) DNA-binding superfamily protein|Chr4:17796362-17797647 REVERSE LENGTH=328	KVI01864.1	Myc-type, basic helix-loop-helix (bHLH) domain-containing protein [Cynara cardunculus var. scolymus]	sp|Q9T072|BH025_ARATH	Transcription factor bHLH25 OS=Arabidopsis thaliana GN=BHLH25 PE=2 SV=2	--	--	--	--	--	-	-	-
Unigene001447	1199	AT2G44420.3	protein N-terminal asparagine amidohydrolase family protein|Chr2:18330822-18332696 FORWARD LENGTH=332	KVI00653.1	Protein N-terminal asparagine amidohydrolase [Cynara cardunculus var. scolymus]	sp|Q96AB6|NTAN1_HUMAN	Protein N-terminal asparagine amidohydrolase OS=Homo sapiens GN=NTAN1 PE=1 SV=3	--	--	--	K14662//protein N-terminal asparagine amidohydrolase [EC:3.5.1.-]	vvi:100245927	-	-	-
Unigene001448	1020	AT2G44420.3	protein N-terminal asparagine amidohydrolase family protein|Chr2:18330822-18332696 FORWARD LENGTH=332	KVI00653.1	Protein N-terminal asparagine amidohydrolase [Cynara cardunculus var. scolymus]	sp|Q28955|NTAN1_PIG	Protein N-terminal asparagine amidohydrolase OS=Sus scrofa GN=NTAN1 PE=1 SV=3	--	--	--	K14662//protein N-terminal asparagine amidohydrolase [EC:3.5.1.-]	vvi:100245927	-	-	-
Unigene001449	295	--	--	--	--	--	--	--	--	--	--	--	-	-	-
Unigene001450	626	--	--	OAY74165.1	Importin subunit beta-1, partial [Ananas comosus]	--	--	--	--	--	K14293//importin subunit beta-1	bdi:100829120	-	-	-
Unigene001451	546	--	--	--	--	--	--	--	--	--	--	--	-	-	-
Unigene001452	1134	--	--	--	--	--	--	--	--	--	--	--	-	-	-
Unigene001453	553	--	--	--	--	--	--	--	--	--	--	--	-	-	-
Unigene001454	401	AT3G42723.1	ATP binding / aminoacyl-tRNA ligase/ nucleotide binding protein|Chr3:14838392-14841189 REVERSE LENGTH=818	KVH91544.1	Ankyrin repeat-containing protein [Cynara cardunculus var. scolymus]	--	--	--	--	--	--	--	-	-	-
Unigene001455	302	--	--	KVI08277.1	Zinc finger, C6HC-type [Cynara cardunculus var. scolymus]	--	--	--	--	--	K11968//ariadne-1 [EC:2.3.2.27]	pda:103724095	-	-	-
Unigene001456	337	--	--	--	--	--	--	--	--	--	--	--	-	-	-
Unigene001457	489	--	--	--	--	--	--	--	--	--	--	--	-	-	-
Unigene001458	345	--	--	--	--	--	--	--	--	--	--	--	-	-	-
Unigene001459	519	--	--	CDY54210.1	BnaA04g28140D, partial [Brassica napus]	sp|O81778|REM9_ARATH	B3 domain-containing protein REM9 OS=Arabidopsis thaliana GN=REM9 PE=2 SV=1	--	--	--	--	--	-	-	-
Unigene001460	1047	AT4G31690.1	transcriptional factor B3 family protein|Chr4:15344035-15345161 REVERSE LENGTH=275	KVH96128.1	AT hook-like protein, partial [Cynara cardunculus var. scolymus]	sp|O81778|REM9_ARATH	B3 domain-containing protein REM9 OS=Arabidopsis thaliana GN=REM9 PE=2 SV=1	--	--	--	--	--	-	-	-
Unigene001461	216	--	--	--	--	--	--	--	--	--	--	--	-	-	-
Unigene001462	507	--	--	XP_019173282.1	PREDICTED: protein FAR-RED IMPAIRED RESPONSE 1-like [Ipomoea nil]	--	--	--	--	--	--	--	-	-	-
Unigene001463	895	AT4G13830.2	DNAJ-like 20|Chr4:8011518-8012577 FORWARD LENGTH=197	KVI12290.1	DnaJ domain-containing protein [Cynara cardunculus var. scolymus]	sp|Q9SDN0|DNJ20_ARATH	Chaperone protein dnaJ 20, chloroplastic OS=Arabidopsis thaliana GN=ATJ20 PE=1 SV=2	At4g13830	KOG0712	Molecular chaperone (DnaJ superfamily)	--	--	GO:0051338//regulation of transferase activity;GO:0050790//regulation of catalytic activity;GO:0050789//regulation of biological process;GO:0050794//regulation of cellular process;GO:0031323//regulation of cellular metabolic process;GO:0019222//regulation of metabolic process;GO:0006457//protein folding;GO:0009987//cellular process;GO:0065009//regulation of molecular function;GO:0065007//biologic…	GO:0005488//binding	GO:0005623//cell;GO:0005622//intracellular;GO:0044424//intracellular part;GO:0043226//organelle;GO:0043227//membrane-bounded organelle;GO:0005737//cytoplasm;GO:0043229//intracellular organelle;GO:0009536//plastid;GO:0043231//intracellular membrane-bounded organelle;GO:0044444//cytoplasmic part;GO:0044464//cell part
Unigene001464	309	AT5G60900.1	receptor-like protein kinase 1|Chr5:24498467-24501494 REVERSE LENGTH=832	KVH88781.1	Apple-like protein [Cynara cardunculus var. scolymus]	sp|Q7FAZ0|LERK4_ORYSJ	G-type lectin S-receptor-like serine/threonine-protein kinase LECRK4 OS=Oryza sativa subsp. japonica GN=LECRK4 PE=3 SV=1	At3g24550	KOG1187	Serine/threonine protein kinase	--	--	GO:0044699//single-organism process;GO:0009987//cellular process;GO:0043412//macromolecule modification;GO:0043170//macromolecule metabolic process;GO:0006793//phosphorus metabolic process;GO:0071704//organic substance metabolic process;GO:0006464//cellular protein modification process;GO:0044267//cellular protein metabolic process;GO:0019538//protein metabolic process;GO:0008037//cell recognitio…	GO:0016301//kinase activity;GO:0003824//catalytic activity;GO:0001883//purine nucleoside binding;GO:0016740//transferase activity;GO:0001882//nucleoside binding;GO:0032549//ribonucleoside binding;GO:0016773//phosphotransferase activity, alcohol group as acceptor;GO:0032550//purine ribonucleoside binding;GO:0036094//small molecule binding;GO:0097367//carbohydrate derivative binding;GO:1901363//het…	GO:0016020//membrane;GO:0031224//intrinsic component of membrane;GO:0044425//membrane part
Unigene001465	345	--	--	--	--	--	--	--	--	--	--	--	-	-	-
Unigene001466	1608	AT3G48280.1	cytochrome P450%2C family 71%2C subfamily A%2C polypeptide 25|Chr3:17879594-17881164 FORWARD LENGTH=490	KVH98166.1	cytochrome P450 [Cynara cardunculus var. scolymus]	sp|P37118|C71A2_SOLME	Cytochrome P450 71A2 OS=Solanum melongena GN=CYP71A2 PE=2 SV=1	At4g13310	KOG0156	Cytochrome P450 CYP2 subfamily	--	--	-	GO:0005488//binding	-
Unigene001467	760	--	--	--	--	--	--	--	--	--	--	--	-	-	-
Unigene001468	314	AT5G37630.1	ARM repeat superfamily protein|Chr5:14947407-14952546 FORWARD LENGTH=1051	XP_019185178.1	PREDICTED: condensin complex subunit 3 [Ipomoea nil]	--	--	At5g37630	KOG2025	Chromosome condensation complex Condensin, subunit G	K06678//condensin complex subunit 3	tcc:TCM_017483	GO:0000070//mitotic sister chromatid segregation;GO:0006996//organelle organization;GO:0098813//nuclear chromosome segregation;GO:0007059//chromosome segregation;GO:0000819//sister chromatid segregation;GO:0016043//cellular component organization;GO:1902589//single-organism organelle organization;GO:0048285//organelle fission;GO:0007049//cell cycle;GO:1903047//mitotic cell cycle process;GO:000027…	-	GO:0005911//cell-cell junction;GO:0030054//cell junction
Unigene001469	538	AT3G12120.2	fatty acid desaturase 2|Chr3:3860592-3861743 REVERSE LENGTH=383	XP_003870822.1	Fad2 Delta-12 fatty acid desaturase [Candida orthopsilosis Co 90-125]// XP_003870822.1 Fad2 Delta-12 fatty acid desaturase [Candida orthopsilosis Co 90-125]	sp|P59668|FAD12_MORIS	Delta(12) fatty acid desaturase OS=Mortierella isabellina PE=2 SV=1	--	--	--	K10256//omega-6 fatty acid desaturase (delta-12 desaturase) [EC:1.14.19.-]	bdi:100837786	-	-	-
Unigene001470	427	--	--	--	--	--	--	--	--	--	--	--	-	-	-
Unigene001471	228	--	--	--	--	--	--	--	--	--	--	--	-	-	-
Unigene001472	552	--	--	KYP39434.1	Retrotransposable element Tf2 [Cajanus cajan]	sp|Q8I7P9|POL5_DROME	Retrovirus-related Pol polyprotein from transposon opus OS=Drosophila melanogaster GN=pol PE=3 SV=1	At2g06470	KOG0017	FOG: Transposon-encoded proteins with TYA, reverse transcriptase, integrase domains in various combinations	--	--	-	-	-
Unigene001473	1506	AT4G37750.1	Integrase-type DNA-binding superfamily protein|Chr4:17739782-17742189 FORWARD LENGTH=555	KVH87693.1	AP2/ERF domain-containing protein [Cynara cardunculus var. scolymus]	sp|Q38914|ANT_ARATH	AP2-like ethylene-responsive transcription factor ANT OS=Arabidopsis thaliana GN=ANT PE=1 SV=2	--	--	--	K09285//AP2-like factor, ANT lineage	sly:101244632	-	-	-
Unigene001474	573	--	--	KVH92603.1	ATPase, AAA-type, conserved site-containing protein [Cynara cardunculus var. scolymus]	--	--	--	--	--	--	--	-	-	-
Unigene001475	941	--	--	--	--	--	--	--	--	--	--	--	-	-	-
Unigene001476	1118	AT2G30505.1	Late embryogenesis abundant (LEA) hydroxyproline-rich glycoprotein family|Chr2:13001121-13002086 REVERSE LENGTH=321	CDY29668.1	BnaA04g17590D [Brassica napus]	--	--	--	--	--	--	--	-	-	-
Unigene001477	1326	AT2G30505.1	Late embryogenesis abundant (LEA) hydroxyproline-rich glycoprotein family|Chr2:13001121-13002086 REVERSE LENGTH=321	CDY29668.1	BnaA04g17590D [Brassica napus]	--	--	--	--	--	--	--	-	-	-
Unigene001478	338	AT5G41610.2	cation/H+ exchanger 18|Chr5:16638554-16640859 REVERSE LENGTH=742	KVH95337.1	Cation/H+ exchanger [Cynara cardunculus var. scolymus]	sp|Q9FFR9|CHX18_ARATH	Cation/H(+) antiporter 18 OS=Arabidopsis thaliana GN=CHX18 PE=2 SV=1	At5g41610	KOG1650	Predicted K+/H+-antiporter	--	--	GO:0044699//single-organism process;GO:0006812//cation transport;GO:0009987//cellular process;GO:0051179//localization;GO:1902578//single-organism localization;GO:0015992//proton transport;GO:0044765//single-organism transport;GO:0006818//hydrogen transport;GO:0006811//ion transport;GO:0051234//establishment of localization;GO:0044763//single-organism cellular process;GO:0015672//monovalent inorg…	GO:0015078//hydrogen ion transmembrane transporter activity;GO:0015077//monovalent inorganic cation transmembrane transporter activity;GO:0005215//transporter activity;GO:0022890//inorganic cation transmembrane transporter activity;GO:0008324//cation transmembrane transporter activity;GO:0015075//ion transmembrane transporter activity;GO:0022892//substrate-specific transporter activity;GO:0022891…	GO:0016020//membrane;GO:0031224//intrinsic component of membrane;GO:0044425//membrane part
Unigene001479	1715	AT5G41610.2	cation/H+ exchanger 18|Chr5:16638554-16640859 REVERSE LENGTH=742	KVH95337.1	Cation/H+ exchanger [Cynara cardunculus var. scolymus]	sp|Q9SUQ7|CHX17_ARATH	Cation/H(+) antiporter 17 OS=Arabidopsis thaliana GN=CHX17 PE=1 SV=1	At4g23700	KOG1650	Predicted K+/H+-antiporter	--	--	-	-	-
Unigene001480	557	--	--	--	--	--	--	--	--	--	--	--	-	-	-
Unigene001481	578	--	--	--	--	--	--	--	--	--	--	--	-	-	-
Unigene001482	371	--	--	--	--	--	--	--	--	--	--	--	-	-	-
Unigene001483	1626	AT5G23960.2	terpene synthase 21|Chr5:8092969-8095128 FORWARD LENGTH=545	CAC36896.1	germacrene A synthase [Solidago canadensis]	sp|I6QPS5|TPS5_MATCR	(-)-germacrene D synthase OS=Matricaria chamomilla var. recutita PE=1 SV=1	--	--	--	--	--	-	-	-
Unigene001484	532	AT1G47890.1	receptor like protein 7|Chr1:17643976-17647035 FORWARD LENGTH=1019	XP_015902175.1	PREDICTED: receptor-like protein 12 [Ziziphus jujuba]	sp|C0LGT6|EFR_ARATH	LRR receptor-like serine/threonine-protein kinase EFR OS=Arabidopsis thaliana GN=EFR PE=1 SV=1	At1g47890	KOG0619	FOG: Leucine rich repeat	--	--	-	-	-
Unigene001485	290	AT1G58520.5	GDSL-like lipase/acylhydrolase superfamily protein|Chr1:21733994-21738165 FORWARD LENGTH=628	EOY15636.1	Lipases,hydrolases, acting on ester bonds isoform 2 [Theobroma cacao]	sp|F4IBD7|CSCLA_ARATH	CSC1-like protein RXW8 OS=Arabidopsis thaliana GN=RXW8 PE=2 SV=1	At1g10090	KOG1134	Uncharacterized conserved protein	--	--	-	GO:0003824//catalytic activity	GO:0044425//membrane part;GO:0016020//membrane;GO:0031224//intrinsic component of membrane
Unigene001486	326	--	--	--	--	--	--	--	--	--	--	--	-	-	-
Unigene001487	229	--	--	--	--	--	--	--	--	--	--	--	-	-	-
Unigene001488	254	--	--	--	--	--	--	--	--	--	--	--	-	-	-
Unigene001489	245	--	--	--	--	--	--	--	--	--	--	--	-	-	-
Unigene001490	1494	AT3G10410.1	SERINE CARBOXYPEPTIDASE-LIKE 49|Chr3:3235518-3238063 REVERSE LENGTH=516	OMO82857.1	Peptidase S10, serine carboxypeptidase [Corchorus capsularis]	sp|P21529|CBP3_HORVU	Serine carboxypeptidase 3 OS=Hordeum vulgare GN=CBP3 PE=1 SV=2	At3g10410	KOG1282	Serine carboxypeptidases (lysosomal cathepsin A)	K16298//serine carboxypeptidase-like clade IV [EC:3.4.16.-]	jcu:105628025	-	-	-
Unigene001491	811	AT3G10410.1	SERINE CARBOXYPEPTIDASE-LIKE 49|Chr3:3235518-3238063 REVERSE LENGTH=516	XP_006361688.1	PREDICTED: serine carboxypeptidase-like [Solanum tuberosum]	sp|P32826|SCP49_ARATH	Serine carboxypeptidase-like 49 OS=Arabidopsis thaliana GN=SCPL49 PE=2 SV=2	At3g10410	KOG1282	Serine carboxypeptidases (lysosomal cathepsin A)	K16298//serine carboxypeptidase-like clade IV [EC:3.4.16.-]	sot:102604138	-	-	-
Unigene001492	202	--	--	--	--	--	--	--	--	--	--	--	-	-	-
Unigene001493	359	AT5G64500.1	Major facilitator superfamily protein|Chr5:25780511-25783474 FORWARD LENGTH=484	KVI01860.1	Major facilitator superfamily [Cynara cardunculus var. scolymus]	sp|Q9FLG8|SPNS2_ARATH	Probable sphingolipid transporter spinster homolog 2 OS=Arabidopsis thaliana GN=At5g64500 PE=2 SV=1	At5g64500	KOG1330	Sugar transporter/spinster transmembrane protein	--	--	-	-	-
Unigene001494	353	--	--	--	--	--	--	--	--	--	--	--	-	-	-
Unigene001495	287	--	--	--	--	--	--	--	--	--	--	--	-	-	-
Unigene001496	320	--	--	--	--	--	--	--	--	--	--	--	-	-	-
Unigene001497	851	ATCG01110.1	NAD(P)H dehydrogenase subunit H|ChrC:122011-123192 REVERSE LENGTH=393	AJE74318.1	NADH dehydrogenase subunit 7 (plastid) [Thelesperma filifolium]	sp|B2LMP2|NDHH_GUIAB	NAD(P)H-quinone oxidoreductase subunit H, chloroplastic OS=Guizotia abyssinica GN=ndhH PE=3 SV=1	AtCh079	KOG2870	NADH:ubiquinone oxidoreductase, NDUFS2/49 kDa subunit	K05579//NAD(P)H-quinone oxidoreductase subunit H [EC:1.6.5.3]	sot:4099911	GO:0044710//single-organism metabolic process;GO:0044237//cellular metabolic process;GO:0044699//single-organism process;GO:0051179//localization;GO:0008152//metabolic process;GO:0006091//generation of precursor metabolites and energy;GO:0009987//cellular process;GO:0051234//establishment of localization	GO:0097159//organic cyclic compound binding;GO:1901363//heterocyclic compound binding;GO:0016491//oxidoreductase activity;GO:0048037//cofactor binding;GO:1901265//nucleoside phosphate binding;GO:0005488//binding;GO:0036094//small molecule binding;GO:0003954//NADH dehydrogenase activity;GO:0016651//oxidoreductase activity, acting on NAD(P)H;GO:0000166//nucleotide binding;GO:0003824//catalytic acti…	GO:0044424//intracellular part;GO:0044464//cell part;GO:0005623//cell;GO:0043226//organelle;GO:0031984//organelle subcompartment;GO:0044444//cytoplasmic part;GO:0005737//cytoplasm;GO:0043229//intracellular organelle;GO:0044435//plastid part;GO:0005622//intracellular;GO:0031976//plastid thylakoid;GO:0009579//thylakoid;GO:0044446//intracellular organelle part;GO:0043231//intracellular membrane-boun…
Unigene001498	321	ATCG01100.1	NADH dehydrogenase family protein|ChrC:119847-122009 REVERSE LENGTH=360	AMX21815.1	orf188 (mitochondrion) [Dendrosenecio brassiciformis]	sp|Q332S2|NU1C_LACSA	NAD(P)H-quinone oxidoreductase subunit 1, chloroplastic OS=Lactuca sativa GN=ndhA PE=3 SV=1	AtCh078	KOG4770	NADH dehydrogenase subunit 1	K05572//NAD(P)H-quinone oxidoreductase subunit 1 [EC:1.6.5.3]	rcu:RCOM_ORF00111	GO:0008152//metabolic process;GO:0044710//single-organism metabolic process;GO:0009987//cellular process;GO:0044699//single-organism process;GO:0044237//cellular metabolic process;GO:0006091//generation of precursor metabolites and energy	GO:0048037//cofactor binding;GO:0003824//catalytic activity;GO:0005488//binding;GO:0016651//oxidoreductase activity, acting on NAD(P)H;GO:0016491//oxidoreductase activity	GO:0044425//membrane part;GO:0031224//intrinsic component of membrane;GO:0043227//membrane-bounded organelle;GO:0005623//cell;GO:0009534//chloroplast thylakoid;GO:0044434//chloroplast part;GO:0044422//organelle part;GO:0044424//intracellular part;GO:0044435//plastid part;GO:0043231//intracellular membrane-bounded organelle;GO:0016020//membrane;GO:0044464//cell part;GO:0009579//thylakoid;GO:000562…
Unigene001499	208	--	--	--	--	--	--	--	--	--	--	--	-	-	-
Unigene001500	493	--	--	--	--	--	--	--	--	--	--	--	-	-	-
Unigene001501	842	--	--	--	--	--	--	--	--	--	--	--	-	-	-
Unigene001502	581	--	--	--	--	--	--	--	--	--	--	--	-	-	-
Unigene001503	693	--	--	--	--	--	--	--	--	--	--	--	-	-	-
Unigene001504	382	--	--	OEU22311.1	trypsin-like serine protease [Fragilariopsis cylindrus CCMP1102]	sp|P03952|KLKB1_HUMAN	Plasma kallikrein OS=Homo sapiens GN=KLKB1 PE=1 SV=1	7294130	KOG3627	Trypsin	--	--	GO:0008152//metabolic process;GO:0044699//single-organism process	GO:0003824//catalytic activity;GO:0016787//hydrolase activity;GO:0008233//peptidase activity	-
Unigene001505	411	--	--	--	--	--	--	--	--	--	--	--	-	-	-
Unigene001506	532	--	--	--	--	--	--	--	--	--	--	--	-	-	-
Unigene001507	502	--	--	--	--	--	--	--	--	--	--	--	-	-	-
Unigene001508	568	--	--	ABA97293.1	Zinc knuckle family protein [Oryza sativa Japonica Group]	--	--	--	--	--	--	--	-	-	-
Unigene001509	277	--	--	--	--	--	--	--	--	--	--	--	-	-	-
Unigene001510	331	--	--	--	--	--	--	--	--	--	--	--	-	-	-
Unigene001511	1833	--	--	XP_003299306.1	hypothetical protein PTT_10267 [Pyrenophora teres f. teres 0-1]// EFQ92585.1 hypothetical protein PTT_10267 [Pyrenophora teres f. teres 0-1]	--	--	--	--	--	--	--	-	-	-
Unigene001512	273	--	--	--	--	--	--	--	--	--	--	--	-	-	-
Unigene001513	387	--	--	--	--	--	--	--	--	--	--	--	-	-	-
Unigene001514	857	--	--	--	--	--	--	--	--	--	--	--	-	-	-
Unigene001515	552	--	--	--	--	--	--	--	--	--	--	--	-	-	-
Unigene001516	212	--	--	--	--	--	--	--	--	--	--	--	-	-	-
Unigene001517	215	--	--	--	--	--	--	--	--	--	--	--	-	-	-
Unigene001518	338	--	--	--	--	--	--	--	--	--	--	--	-	-	-
Unigene001519	685	--	--	--	--	--	--	--	--	--	--	--	-	-	-
Unigene001520	256	--	--	--	--	--	--	--	--	--	--	--	-	-	-
Unigene001521	314	--	--	KVH91544.1	Ankyrin repeat-containing protein [Cynara cardunculus var. scolymus]	--	--	--	--	--	--	--	-	-	-
Unigene001522	213	AT5G17680.2	disease resistance protein (TIR-NBS-LRR class)|Chr5:5822999-5827153 FORWARD LENGTH=1295	XP_018497834.1	PREDICTED: TMV resistance protein N-like [Pyrus x bretschneideri]	sp|Q9C7X0|ADR2_ARATH	Disease resistance protein ADR2 OS=Arabidopsis thaliana GN=ADR2 PE=2 SV=1	--	--	--	--	--	-	-	-
Unigene001523	304	--	--	--	--	--	--	--	--	--	--	--	-	-	-
Unigene001524	343	--	--	--	--	--	--	--	--	--	--	--	-	-	-
Unigene001525	450	--	--	--	--	--	--	--	--	--	--	--	-	-	-
Unigene001526	201	--	--	--	--	--	--	--	--	--	--	--	-	-	-
Unigene001527	481	--	--	--	--	--	--	--	--	--	--	--	-	-	-
Unigene001528	2549	AT5G41790.2	COP1-interactive protein 1|Chr5:16727530-16732391 FORWARD LENGTH=1586	XP_018860551.1	PREDICTED: protein NETWORKED 1A-like [Juglans regia]// XP_018860552.1 PREDICTED: protein NETWORKED 1A-like [Juglans regia]// XP_018860553.1 PREDICTED: protein NETWORKED 1A-like [Juglans regia]// XP_018860554.1 PREDICTED: protein NETWORKED 1A-like [Juglans regia]// XP_018860555.1 PREDICTED: protein NETWORKED 1A-like [Juglans regia]	sp|Q21313|EPI1_CAEEL	Laminin-like protein epi-1 OS=Caenorhabditis elegans GN=epi-1 PE=1 SV=1	CE25049	KOG1836	Extracellular matrix glycoprotein Laminin subunits alpha and gamma	--	--	-	-	-
Unigene001529	332	AT4G28460.1	transmembrane protein|Chr4:14066083-14066301 FORWARD LENGTH=72	KVI08036.1	hypothetical protein Ccrd_013599 [Cynara cardunculus var. scolymus]	--	--	--	--	--	--	--	-	-	-
Unigene001530	394	--	--	--	--	--	--	--	--	--	--	--	-	-	-
Unigene001531	234	--	--	ACC54346.1	CYCLOIDEA-like 1 [Gerbera hybrid cultivar]	--	--	--	--	--	--	--	-	-	-
Unigene001532	483	--	--	--	--	--	--	--	--	--	--	--	-	-	-
Unigene001533	227	--	--	--	--	--	--	--	--	--	--	--	-	-	-
Unigene001534	354	--	--	--	--	--	--	--	--	--	--	--	-	-	-
Unigene001535	720	--	--	OMO52265.1	Chlorophyll A-B binding protein [Corchorus olitorius]	--	--	--	--	--	--	--	-	-	-
Unigene001536	855	ATMG00860.1	DNA/RNA polymerases superfamily protein|ChrM:235916-236392 FORWARD LENGTH=158	OMO73136.1	reverse transcriptase [Corchorus capsularis]	sp|P04323|POL3_DROME	Retrovirus-related Pol polyprotein from transposon 17.6 OS=Drosophila melanogaster GN=pol PE=3 SV=1	At1g36590_2	KOG0017	FOG: Transposon-encoded proteins with TYA, reverse transcriptase, integrase domains in various combinations	--	--	-	-	-
Unigene001537	265	--	--	--	--	--	--	--	--	--	--	--	-	-	-
Unigene001538	202	AT4G23160.3	cysteine-rich RECEPTOR-like kinase|Chr4:12129485-12133157 FORWARD LENGTH=1043	XP_010104938.1	Retrovirus-related Pol polyprotein from transposon TNT 1-94 [Morus notabilis]// EXC02386.1 Retrovirus-related Pol polyprotein from transposon TNT 1-94 [Morus notabilis]	sp|P92519|M810_ARATH	Uncharacterized mitochondrial protein AtMg00810 OS=Arabidopsis thaliana GN=AtMg00810 PE=4 SV=1	At4g07810	KOG0017	FOG: Transposon-encoded proteins with TYA, reverse transcriptase, integrase domains in various combinations	--	--	GO:0009987//cellular process;GO:0071704//organic substance metabolic process;GO:0034641//cellular nitrogen compound metabolic process;GO:0043170//macromolecule metabolic process;GO:0006793//phosphorus metabolic process;GO:0044238//primary metabolic process;GO:0044260//cellular macromolecule metabolic process;GO:1901360//organic cyclic compound metabolic process;GO:0006807//nitrogen compound metab…	GO:0016788//hydrolase activity, acting on ester bonds;GO:0004527//exonuclease activity;GO:0016772//transferase activity, transferring phosphorus-containing groups;GO:0004518//nuclease activity;GO:0016740//transferase activity;GO:0016787//hydrolase activity;GO:0003824//catalytic activity	-
Unigene001539	700	--	--	--	--	--	--	--	--	--	--	--	-	-	-
Unigene001540	489	--	--	--	--	--	--	--	--	--	--	--	-	-	-
Unigene001541	348	--	--	--	--	--	--	--	--	--	--	--	-	-	-
Unigene001542	561	--	--	--	--	--	--	--	--	--	--	--	-	-	-
Unigene001543	341	--	--	--	--	--	--	--	--	--	--	--	-	-	-
Unigene001544	439	--	--	--	--	--	--	--	--	--	--	--	-	-	-
Unigene001545	704	--	--	--	--	--	--	--	--	--	--	--	-	-	-
Unigene001546	353	--	--	--	--	--	--	--	--	--	--	--	-	-	-
Unigene001547	259	--	--	KVI03466.1	Protein of unknown function DUF247, plant [Cynara cardunculus var. scolymus]	--	--	--	--	--	--	--	-	-	-
Unigene001548	492	--	--	--	--	--	--	--	--	--	--	--	-	-	-
Unigene001549	394	--	--	--	--	--	--	--	--	--	--	--	-	-	-
Unigene001550	248	--	--	--	--	--	--	--	--	--	--	--	-	-	-
Unigene001551	243	ATMG00710.1	Polynucleotidyl transferase%2C ribonuclease H-like superfamily protein|ChrM:207553-207915 REVERSE LENGTH=120	ABO36622.1	copia LTR rider [Solanum lycopersicum]// ABO36636.1 copia LTR rider [Solanum lycopersicum]	sp|P10978|POLX_TOBAC	Retrovirus-related Pol polyprotein from transposon TNT 1-94 OS=Nicotiana tabacum PE=2 SV=1	At5g35820	KOG0017	FOG: Transposon-encoded proteins with TYA, reverse transcriptase, integrase domains in various combinations	--	--	-	-	-
Unigene001552	1048	AT4G33070.1	Thiamine pyrophosphate dependent pyruvate decarboxylase family protein|Chr4:15952519-15954676 REVERSE LENGTH=607	XP_017252995.1	PREDICTED: pyruvate decarboxylase 1 [Daucus carota subsp. sativus]	sp|P51851|PDC2_PEA	Pyruvate decarboxylase 2 (Fragment) OS=Pisum sativum GN=PDC2 PE=2 SV=1	At4g33070	KOG1184	Thiamine pyrophosphate-requiring enzyme	K01568//pyruvate decarboxylase [EC:4.1.1.1]	tcc:TCM_021649	-	-	-
Unigene001553	484	--	--	--	--	--	--	--	--	--	--	--	-	-	-
Unigene001554	224	--	--	--	--	--	--	--	--	--	--	--	-	-	-
Unigene001555	328	--	--	--	--	--	--	--	--	--	--	--	-	-	-
Unigene001556	359	--	--	--	--	--	--	--	--	--	--	--	-	-	-
Unigene001557	488	--	--	--	--	--	--	--	--	--	--	--	-	-	-
Unigene001558	272	--	--	--	--	--	--	--	--	--	--	--	-	-	-
Unigene001559	263	--	--	--	--	--	--	--	--	--	--	--	-	-	-
Unigene001560	308	--	--	--	--	--	--	--	--	--	--	--	-	-	-
Unigene001561	241	--	--	--	--	--	--	--	--	--	--	--	-	-	-
Unigene001562	244	--	--	--	--	--	--	--	--	--	--	--	-	-	-
Unigene001563	288	--	--	--	--	--	--	--	--	--	--	--	-	-	-
Unigene001564	320	--	--	--	--	--	--	--	--	--	--	--	-	-	-
Unigene001565	214	AT1G32090.1	early-responsive to dehydration stress protein (ERD4)|Chr1:11540244-11544041 REVERSE LENGTH=806	XP_010664612.1	PREDICTED: CSC1-like protein At1g32090 isoform X2 [Vitis vinifera]	sp|Q9FVQ5|CSCL1_ARATH	CSC1-like protein At1g32090 OS=Arabidopsis thaliana GN=At1g32090 PE=1 SV=1	At1g32090	KOG1134	Uncharacterized conserved protein	--	--	-	-	GO:0031224//intrinsic component of membrane;GO:0016020//membrane;GO:0005911//cell-cell junction;GO:0030054//cell junction;GO:0044425//membrane part
Unigene001566	230	--	--	--	--	--	--	--	--	--	--	--	-	-	-
Unigene001567	383	AT4G10270.1	Wound-responsive family protein|Chr4:6374805-6375077 FORWARD LENGTH=90	XP_013464784.1	wound-responsive family protein [Medicago truncatula]// KEH38819.1 wound-responsive family protein [Medicago truncatula]	--	--	--	--	--	--	--	-	-	-
Unigene001568	604	--	--	--	--	--	--	--	--	--	--	--	-	-	-
Unigene001569	695	--	--	--	--	--	--	--	--	--	--	--	-	-	-
Unigene001570	799	--	--	--	--	--	--	--	--	--	--	--	-	-	-
Unigene001571	553	--	--	--	--	--	--	--	--	--	--	--	-	-	-
Unigene001572	226	--	--	--	--	--	--	--	--	--	--	--	-	-	-
Unigene001573	257	--	--	--	--	--	--	--	--	--	--	--	-	-	-
Unigene001574	366	AT1G17230.1	Leucine-rich receptor-like protein kinase family protein|Chr1:5891375-5894855 FORWARD LENGTH=1101	XP_008223897.1	PREDICTED: probable LRR receptor-like serine/threonine-protein kinase At3g47570 [Prunus mume]	sp|Q9SHI2|Y1723_ARATH	Leucine-rich repeat receptor-like serine/threonine-protein kinase At1g17230 OS=Arabidopsis thaliana GN=At1g17230 PE=2 SV=2	At1g71400	KOG0619	FOG: Leucine rich repeat	--	--	-	-	-
Unigene001575	329	--	--	--	--	--	--	--	--	--	--	--	-	-	-
Unigene001576	713	--	--	--	--	--	--	--	--	--	--	--	-	-	-
Unigene001577	615	--	--	--	--	--	--	--	--	--	--	--	-	-	-
Unigene001578	573	--	--	--	--	--	--	--	--	--	--	--	-	-	-
Unigene001579	246	--	--	--	--	--	--	--	--	--	--	--	-	-	-
Unigene001580	283	--	--	--	--	--	--	--	--	--	--	--	-	-	-
Unigene001581	366	--	--	--	--	--	--	--	--	--	--	--	-	-	-
Unigene001582	373	--	--	--	--	--	--	--	--	--	--	--	-	-	-
Unigene001583	761	--	--	--	--	--	--	--	--	--	--	--	-	-	-
Unigene001584	1191	--	--	--	--	--	--	--	--	--	--	--	-	-	-
Unigene001585	291	--	--	--	--	--	--	--	--	--	--	--	-	-	-
Unigene001586	803	--	--	--	--	--	--	--	--	--	--	--	-	-	-
Unigene001587	280	--	--	--	--	--	--	--	--	--	--	--	-	-	-
Unigene001588	217	--	--	KVH98085.1	Concanavalin A-like lectin/glucanase, subgroup [Cynara cardunculus var. scolymus]	sp|Q9FL28|FLS2_ARATH	LRR receptor-like serine/threonine-protein kinase FLS2 OS=Arabidopsis thaliana GN=FLS2 PE=1 SV=1	At2g42800	KOG0619	FOG: Leucine rich repeat	K13420//LRR receptor-like serine/threonine-protein kinase FLS2 [EC:2.7.11.1]	ath:AT5G46330	-	-	-
Unigene001589	326	--	--	--	--	--	--	--	--	--	--	--	-	-	-
Unigene001590	795	--	--	--	--	--	--	--	--	--	--	--	-	-	-
Unigene001591	701	AT4G04540.3	cysteine-rich RLK (RECEPTOR-like protein kinase) 39|Chr4:2259580-2261467 FORWARD LENGTH=519	KVH99815.1	Protein kinase, ATP binding site-containing protein, partial [Cynara cardunculus var. scolymus]	sp|Q9SYS3|CRK40_ARATH	Cysteine-rich receptor-like protein kinase 40 OS=Arabidopsis thaliana GN=CRK40 PE=2 SV=1	At4g34440	KOG1187	Serine/threonine protein kinase	--	--	-	-	-
Unigene001592	344	--	--	--	--	--	--	--	--	--	--	--	-	-	-
Unigene001593	316	--	--	--	--	--	--	--	--	--	--	--	-	-	-
Unigene001594	637	--	--	XP_011459106.1	PREDICTED: armadillo repeat-containing kinesin-like protein 1 [Fragaria vesca subsp. vesca]	sp|F4HR11|KN6_ARATH	Kinesin-like protein KIN-6 OS=Arabidopsis thaliana GN=KIN6 PE=3 SV=2	At1g20060	KOG0242	Kinesin-like protein	K10401//kinesin family member 18/19	fve:101306598	-	-	-
Unigene001595	982	--	--	--	--	--	--	--	--	--	--	--	-	-	-
Unigene001596	638	AT1G21280.1	Copia-like polyprotein/retrotransposon|Chr1:7447690-7448403 REVERSE LENGTH=237	EOY17116.1	Cysteine-rich RLK (RECEPTOR-like protein kinase) 8 [Theobroma cacao]	--	--	At1g36620	KOG0017	FOG: Transposon-encoded proteins with TYA, reverse transcriptase, integrase domains in various combinations	--	--	-	GO:0003824//catalytic activity;GO:0016462//pyrophosphatase activity;GO:0016817//hydrolase activity, acting on acid anhydrides;GO:0017111//nucleoside-triphosphatase activity;GO:0016818//hydrolase activity, acting on acid anhydrides, in phosphorus-containing anhydrides;GO:0016787//hydrolase activity	-
Unigene001597	749	--	--	--	--	--	--	--	--	--	--	--	-	-	-
Unigene001598	275	--	--	--	--	--	--	--	--	--	--	--	-	-	-
Unigene001599	319	--	--	--	--	--	--	--	--	--	--	--	-	-	-
Unigene001600	209	--	--	--	--	--	--	--	--	--	--	--	-	-	-
Unigene001601	224	--	--	XP_010558323.1	PREDICTED: metallothionein-like protein type 2 [Tarenaya hassleriana]	sp|A3AZ88|MT2C_ORYSJ	Metallothionein-like protein 2C OS=Oryza sativa subsp. japonica GN=MT2C PE=2 SV=1	--	--	--	--	--	-	-	-
Unigene001602	289	--	--	ADR66988.1	metallothionein-like protein [Oryza sativa Japonica Group]	sp|A3AZ88|MT2C_ORYSJ	Metallothionein-like protein 2C OS=Oryza sativa subsp. japonica GN=MT2C PE=2 SV=1	--	--	--	--	--	-	-	-
Unigene001603	219	--	--	--	--	--	--	--	--	--	--	--	-	-	-
Unigene001604	493	AT1G49760.2	poly(A) binding protein 8|Chr1:18416740-18419753 FORWARD LENGTH=671	JAT40732.1	Polyadenylate-binding protein 1 [Anthurium amnicola]	sp|P21187|PABP_DROME	Polyadenylate-binding protein OS=Drosophila melanogaster GN=pAbp PE=1 SV=3	7302665	KOG0123	Polyadenylate-binding protein (RRM superfamily)	K13126//polyadenylate-binding protein	ath:AT1G49760	GO:0050896//response to stimulus;GO:0042221//response to chemical;GO:0010038//response to metal ion;GO:0010035//response to inorganic substance	GO:0005488//binding;GO:0003676//nucleic acid binding;GO:0097159//organic cyclic compound binding;GO:0003723//RNA binding;GO:1901363//heterocyclic compound binding	GO:0044424//intracellular part;GO:0005622//intracellular;GO:0044464//cell part;GO:0005737//cytoplasm;GO:0005623//cell;GO:0044444//cytoplasmic part
Unigene001605	497	AT1G49760.2	poly(A) binding protein 8|Chr1:18416740-18419753 FORWARD LENGTH=671	JAT40732.1	Polyadenylate-binding protein 1 [Anthurium amnicola]	sp|P20965|PABPA_XENLA	Polyadenylate-binding protein 1-A OS=Xenopus laevis GN=pabpc1-a PE=1 SV=3	Hs4505575	KOG0123	Polyadenylate-binding protein (RRM superfamily)	K13126//polyadenylate-binding protein	pxb:103964434	-	GO:0003676//nucleic acid binding;GO:0005488//binding;GO:0097159//organic cyclic compound binding;GO:1901363//heterocyclic compound binding	GO:0005623//cell;GO:0044424//intracellular part;GO:0005622//intracellular;GO:0044464//cell part
Unigene001606	564	--	--	--	--	--	--	--	--	--	--	--	-	-	-
Unigene001607	502	--	--	--	--	--	--	--	--	--	--	--	-	-	-
Unigene001608	477	--	--	--	--	--	--	--	--	--	--	--	-	-	-
Unigene001609	237	--	--	--	--	--	--	--	--	--	--	--	-	-	-
Unigene001610	912	AT4G23160.3	cysteine-rich RECEPTOR-like kinase|Chr4:12129485-12133157 FORWARD LENGTH=1043	JAU33683.1	Retrovirus-related Pol polyprotein from transposon TNT 1-94, partial [Noccaea caerulescens]	sp|P10978|POLX_TOBAC	Retrovirus-related Pol polyprotein from transposon TNT 1-94 OS=Nicotiana tabacum PE=2 SV=1	At3g60170	KOG0017	FOG: Transposon-encoded proteins with TYA, reverse transcriptase, integrase domains in various combinations	--	--	-	-	-
Unigene001611	312	--	--	XP_007774097.1	peptide transporter PTR2A [Coniophora puteana RWD-64-598 SS2]// EIW75406.1 peptide transporter PTR2A [Coniophora puteana RWD-64-598 SS2]	sp|P32901|PTR2_YEAST	Peptide transporter PTR2 OS=Saccharomyces cerevisiae (strain ATCC 204508 / S288c) GN=PTR2 PE=1 SV=2	YKR093w	KOG1237	H+/oligopeptide symporter	--	--	GO:0051179//localization;GO:0051234//establishment of localization;GO:0006810//transport	-	GO:0016020//membrane
Unigene001612	404	--	--	--	--	--	--	--	--	--	--	--	-	-	-
Unigene001613	436	--	--	--	--	--	--	--	--	--	--	--	-	-	-
Unigene001614	257	--	--	--	--	--	--	--	--	--	--	--	-	-	-
Unigene001615	315	--	--	--	--	--	--	--	--	--	--	--	-	-	-
Unigene001616	232	--	--	--	--	--	--	--	--	--	--	--	-	-	-
Unigene001617	281	--	--	--	--	--	--	--	--	--	--	--	-	-	-
Unigene001618	556	AT5G22000.3	RING-H2 group F2A|Chr5:7277436-7279553 FORWARD LENGTH=375	KVH90558.1	Zinc finger, RING/FYVE/PHD-type [Cynara cardunculus var. scolymus]	sp|Q9ZT42|RHF2A_ARATH	E3 ubiquitin-protein ligase RHF2A OS=Arabidopsis thaliana GN=RHF2A PE=2 SV=1	--	--	--	K19043//E3 ubiquitin-protein ligase RHF [EC:2.3.2.27]	gmx:100814908	-	-	-
Unigene001619	499	--	--	--	--	--	--	--	--	--	--	--	-	-	-
Unigene001620	962	--	--	BAD72443.1	cyst nematode resistance protein-like [Oryza sativa Japonica Group]	--	--	--	--	--	--	--	-	-	-
Unigene001621	787	--	--	BAD72443.1	cyst nematode resistance protein-like [Oryza sativa Japonica Group]	--	--	--	--	--	--	--	-	-	-
Unigene001622	593	--	--	--	--	--	--	--	--	--	--	--	-	-	-
Unigene001623	507	--	--	--	--	--	--	--	--	--	--	--	-	-	-
Unigene001624	351	--	--	--	--	--	--	--	--	--	--	--	-	-	-
Unigene001625	207	--	--	--	--	--	--	--	--	--	--	--	-	-	-
Unigene001626	372	--	--	--	--	--	--	--	--	--	--	--	-	-	-
Unigene001627	360	--	--	--	--	--	--	--	--	--	--	--	-	-	-
Unigene001628	412	--	--	--	--	--	--	--	--	--	--	--	-	-	-
Unigene001629	252	--	--	--	--	--	--	--	--	--	--	--	-	-	-
Unigene001630	271	--	--	--	--	--	--	--	--	--	--	--	-	-	-
Unigene001631	321	--	--	--	--	--	--	--	--	--	--	--	-	-	-
Unigene001632	208	--	--	--	--	--	--	--	--	--	--	--	-	-	-
Unigene001633	474	--	--	--	--	--	--	--	--	--	--	--	-	-	-
Unigene001634	1299	AT4G36220.1	ferulic acid 5-hydroxylase 1|Chr4:17137584-17139619 REVERSE LENGTH=520	XP_019172415.1	PREDICTED: cytochrome P450 84A1-like [Ipomoea nil]	sp|Q42600|C84A1_ARATH	Cytochrome P450 84A1 OS=Arabidopsis thaliana GN=CYP84A1 PE=1 SV=1	At4g36220	KOG0156	Cytochrome P450 CYP2 subfamily	K09755//ferulate-5-hydroxylase [EC:1.14.-.-]	cmo:103494362	-	GO:0016491//oxidoreductase activity;GO:0003824//catalytic activity;GO:0046872//metal ion binding;GO:0005488//binding;GO:0043169//cation binding;GO:0043167//ion binding	-
Unigene001635	1039	--	--	--	--	--	--	--	--	--	--	--	-	-	-
Unigene001636	335	--	--	--	--	--	--	--	--	--	--	--	-	-	-
Unigene001637	719	--	--	--	--	--	--	--	--	--	--	--	-	-	-
Unigene001638	574	AT4G20090.2	Pentatricopeptide repeat (PPR) superfamily protein|Chr4:10868400-10870382 REVERSE LENGTH=660	KVI11334.1	Pentatricopeptide repeat-containing protein [Cynara cardunculus var. scolymus]	sp|O49436|PP327_ARATH	Pentatricopeptide repeat-containing protein At4g20090 OS=Arabidopsis thaliana GN=EMB1025 PE=3 SV=1	At4g20090	KOG4197	FOG: PPR repeat	--	--	-	-	-
Unigene001639	776	--	--	--	--	--	--	--	--	--	--	--	-	-	-
Unigene001640	972	--	--	--	--	--	--	--	--	--	--	--	-	-	-
Unigene001641	277	--	--	--	--	--	--	--	--	--	--	--	-	-	-
Unigene001642	348	--	--	--	--	--	--	--	--	--	--	--	-	-	-
Unigene001643	1791	AT1G30700.1	FAD-binding Berberine family protein|Chr1:10892623-10894437 FORWARD LENGTH=527	AAL77102.1	carbohydrate oxidase [Lactuca sativa]	sp|Q9SVG4|RETOL_ARATH	Reticuline oxidase-like protein OS=Arabidopsis thaliana GN=At4g20830 PE=1 SV=2	At2g19500	KOG1231	Proteins containing the FAD binding domain	--	--	-	-	-
Unigene001644	264	--	--	--	--	--	--	--	--	--	--	--	-	-	-
Unigene001645	236	--	--	--	--	--	--	--	--	--	--	--	-	-	-
Unigene001646	525	--	--	--	--	--	--	--	--	--	--	--	-	-	-
Unigene001647	266	--	--	--	--	--	--	--	--	--	--	--	-	-	-
Unigene001648	356	--	--	--	--	--	--	--	--	--	--	--	-	-	-
Unigene001649	223	--	--	--	--	--	--	--	--	--	--	--	-	-	-
Unigene001650	355	--	--	--	--	--	--	--	--	--	--	--	-	-	-
Unigene001651	2851	AT1G67020.1	transmembrane protein|Chr1:25011008-25012987 REVERSE LENGTH=659	KVH91544.1	Ankyrin repeat-containing protein [Cynara cardunculus var. scolymus]	--	--	--	--	--	--	--	-	-	-
Unigene001652	2817	AT1G67020.1	transmembrane protein|Chr1:25011008-25012987 REVERSE LENGTH=659	KVH91544.1	Ankyrin repeat-containing protein [Cynara cardunculus var. scolymus]	--	--	--	--	--	--	--	-	-	-
Unigene001653	209	--	--	--	--	--	--	--	--	--	--	--	-	-	-
Unigene001654	388	--	--	--	--	--	--	--	--	--	--	--	-	-	-
Unigene001655	417	--	--	--	--	--	--	--	--	--	--	--	-	-	-
Unigene001656	431	AT4G39200.2	Ribosomal protein S25 family protein|Chr4:18257464-18258464 FORWARD LENGTH=107	XP_007767937.1	ribosomal protein S25 [Coniophora puteana RWD-64-598 SS2]// EIW82176.1 ribosomal protein S25 [Coniophora puteana RWD-64-598 SS2]	sp|Q3E792|RS25A_YEAST	40S ribosomal protein S25-A OS=Saccharomyces cerevisiae (strain ATCC 204508 / S288c) GN=RPS25A PE=1 SV=1	YGR027c	KOG1767	40S ribosomal protein S25	K02975//small subunit ribosomal protein S25e	vcn:VOLCADRAFT_82071	-	-	-
Unigene001657	323	--	--	--	--	--	--	--	--	--	--	--	-	-	-
Unigene001658	604	--	--	OMO68078.1	Aspartic peptidase [Corchorus capsularis]	--	--	--	--	--	--	--	-	-	-
Unigene001659	227	AT4G05320.7	polyubiquitin 10|Chr4:2718559-2719932 FORWARD LENGTH=153	ABA28993.1	polyubiquitin, partial [Symbiodinium sp. C3]	sp|P23398|UBIQP_STRPU	Polyubiquitin (Fragment) OS=Strongylocentrotus purpuratus PE=2 SV=2	7292401	KOG0001	Ubiquitin and ubiquitin-like proteins	K08770//ubiquitin C	cre:CHLREDRAFT_140045	-	-	-
Unigene001660	204	--	--	--	--	--	--	--	--	--	--	--	-	-	-
Unigene001661	338	--	--	--	--	--	--	--	--	--	--	--	-	-	-
Unigene001662	498	--	--	--	--	--	--	--	--	--	--	--	-	-	-
Unigene001663	554	--	--	--	--	--	--	--	--	--	--	--	-	-	-
Unigene001664	456	--	--	--	--	--	--	--	--	--	--	--	-	-	-
Unigene001665	396	--	--	--	--	--	--	--	--	--	--	--	-	-	-
Unigene001666	410	--	--	--	--	--	--	--	--	--	--	--	-	-	-
Unigene001667	715	--	--	--	--	--	--	--	--	--	--	--	-	-	-
Unigene001668	368	--	--	KVH90766.1	Homeobox KN domain-containing protein [Cynara cardunculus var. scolymus]	--	--	--	--	--	--	--	-	-	-
Unigene001669	806	AT3G24255.7	RNA-directed DNA polymerase (reverse transcriptase)-related family protein|Chr3:8789309-8793208 FORWARD LENGTH=828	ABN05720.1	RNA-directed DNA polymerase (Reverse transcriptase) [Medicago truncatula]	sp|O00370|LORF2_HUMAN	LINE-1 retrotransposable element ORF2 protein OS=Homo sapiens PE=1 SV=1	At4g04000	KOG1075	FOG: Reverse transcriptase	--	--	-	-	-
Unigene001670	218	--	--	--	--	--	--	--	--	--	--	--	-	-	-
Unigene001671	310	--	--	--	--	--	--	--	--	--	--	--	-	-	-
Unigene001672	249	--	--	--	--	--	--	--	--	--	--	--	-	-	-
Unigene001673	920	AT1G32240.2	Homeodomain-like superfamily protein|Chr1:11626666-11630355 REVERSE LENGTH=366	KVH90219.1	Homeodomain-like protein, partial [Cynara cardunculus var. scolymus]	sp|Q9C616|KAN2_ARATH	Probable transcription factor KAN2 OS=Arabidopsis thaliana GN=KAN2 PE=2 SV=1	At4g31920	KOG1601	GATA-4/5/6 transcription factors	--	--	-	-	-
Unigene001674	368	--	--	KVI05340.1	CMP/dCMP deaminase, zinc-binding [Cynara cardunculus var. scolymus]	--	--	--	--	--	K11991//tRNA(adenine34) deaminase [EC:3.5.4.33]	jcu:105641947	-	-	-
Unigene001675	1074	--	--	KVI05340.1	CMP/dCMP deaminase, zinc-binding [Cynara cardunculus var. scolymus]	--	--	--	--	--	K11991//tRNA(adenine34) deaminase [EC:3.5.4.33]	vvi:100259373	-	-	-
Unigene001676	421	--	--	--	--	--	--	--	--	--	--	--	-	-	-
Unigene001677	355	--	--	--	--	--	--	--	--	--	--	--	-	-	-
Unigene001678	374	--	--	--	--	--	--	--	--	--	--	--	-	-	-
Unigene001679	218	--	--	--	--	--	--	--	--	--	--	--	-	-	-
Unigene001680	286	--	--	--	--	--	--	--	--	--	--	--	-	-	-
Unigene001681	262	--	--	--	--	--	--	--	--	--	--	--	-	-	-
Unigene001682	224	--	--	--	--	--	--	--	--	--	--	--	-	-	-
Unigene001683	201	--	--	--	--	--	--	--	--	--	--	--	-	-	-
Unigene001684	680	--	--	--	--	--	--	--	--	--	--	--	-	-	-
Unigene001685	206	--	--	--	--	--	--	--	--	--	--	--	-	-	-
Unigene001686	452	AT4G36210.2	transmembrane/coiled-coil protein (DUF726)|Chr4:17130951-17134302 FORWARD LENGTH=516	GAV75906.1	DUF726 domain-containing protein [Cephalotus follicularis]	--	--	At4g36210	KOG2385	Uncharacterized conserved protein	--	--	-	-	-
Unigene001687	438	--	--	--	--	--	--	--	--	--	--	--	-	-	-
Unigene001688	458	--	--	--	--	--	--	--	--	--	--	--	-	-	-
Unigene001689	567	--	--	ONM34069.1	Helicase [Zea mays]	--	--	At2g05080	KOG0987	DNA helicase PIF1/RRM3	--	--	-	-	-
Unigene001690	320	--	--	--	--	--	--	--	--	--	--	--	-	-	-
Unigene001691	476	--	--	--	--	--	--	--	--	--	--	--	-	-	-
Unigene001692	210	--	--	--	--	--	--	--	--	--	--	--	-	-	-
Unigene001693	205	--	--	--	--	--	--	--	--	--	--	--	-	-	-
Unigene001694	213	--	--	--	--	--	--	--	--	--	--	--	-	-	-
Unigene001695	203	--	--	--	--	--	--	--	--	--	--	--	-	-	-
Unigene001696	384	--	--	--	--	--	--	--	--	--	--	--	-	-	-
Unigene001697	259	--	--	KYP62130.1	Retrovirus-related Pol polyprotein from transposon TNT 1-94 [Cajanus cajan]	--	--	At2g21310	KOG0017	FOG: Transposon-encoded proteins with TYA, reverse transcriptase, integrase domains in various combinations	--	--	GO:0008152//metabolic process;GO:0009987//cellular process;GO:0044237//cellular metabolic process	-	-
Unigene001698	267	AT1G10970.2	zinc transporter|Chr1:3665201-3666526 REVERSE LENGTH=374	XP_010262121.1	PREDICTED: zinc transporter 4, chloroplastic isoform X1 [Nelumbo nucifera]	sp|O04089|ZIP4_ARATH	Zinc transporter 4, chloroplastic OS=Arabidopsis thaliana GN=ZIP4 PE=2 SV=1	At1g10970	KOG1558	Fe2+/Zn2+ regulated transporter	K14709//solute carrier family 39 (zinc transporter), member 1/2/3	sot:102597154	-	-	-
Unigene001699	608	--	--	--	--	--	--	--	--	--	--	--	-	-	-
Unigene001700	511	--	--	--	--	--	--	--	--	--	--	--	-	-	-
Unigene001701	202	ATMG00810.1	DNA/RNA polymerases superfamily protein|ChrM:227709-228431 REVERSE LENGTH=240	ONM34760.1	Potassium transporter 3 [Zea mays]	sp|P92519|M810_ARATH	Uncharacterized mitochondrial protein AtMg00810 OS=Arabidopsis thaliana GN=AtMg00810 PE=4 SV=1	At2g07683	KOG0017	FOG: Transposon-encoded proteins with TYA, reverse transcriptase, integrase domains in various combinations	--	--	-	-	-
Unigene001702	306	--	--	--	--	--	--	--	--	--	--	--	-	-	-
Unigene001703	832	--	--	KVI07702.1	Bromodomain-containing protein [Cynara cardunculus var. scolymus]	--	--	--	--	--	--	--	-	-	-
Unigene001704	246	--	--	--	--	--	--	--	--	--	--	--	-	-	-
Unigene001705	327	--	--	--	--	--	--	--	--	--	--	--	-	-	-
Unigene001706	232	--	--	--	--	--	--	--	--	--	--	--	-	-	-
Unigene001707	300	--	--	--	--	--	--	--	--	--	--	--	-	-	-
Unigene001708	351	--	--	--	--	--	--	--	--	--	--	--	-	-	-
Unigene001709	218	--	--	--	--	--	--	--	--	--	--	--	-	-	-
Unigene001710	1173	AT5G54650.2	formin homology5|Chr5:22197856-22201649 REVERSE LENGTH=900	XP_016512616.1	PREDICTED: formin-like protein 5 [Nicotiana tabacum]	sp|Q94B77|FH5_ARATH	Formin-like protein 5 OS=Arabidopsis thaliana GN=FH5 PE=2 SV=2	At5g54650	KOG1922	Rho GTPase effector BNI1 and related formins	--	--	-	-	-
Unigene001711	303	--	--	--	--	--	--	--	--	--	--	--	-	-	-
Unigene001712	389	--	--	--	--	--	--	--	--	--	--	--	-	-	-
Unigene001713	677	--	--	--	--	--	--	--	--	--	--	--	-	-	-
Unigene001714	301	AT1G77460.4	CELLULOSE SYNTHASE INTERACTIVE 3|Chr1:29104378-29111580 FORWARD LENGTH=2136	KVH21214.1	Armadillo [Cynara cardunculus var. scolymus]	--	--	At1g77460	KOG0167	FOG: Armadillo/beta-catenin-like repeats	--	--	-	-	-
Unigene001715	306	AT2G40300.1	ferritin 4|Chr2:16831501-16833214 REVERSE LENGTH=259	JAT53350.1	Ferritin subunit [Anthurium amnicola]	sp|O46119|FRIH_ECHGR	Ferritin heavy chain OS=Echinococcus granulosus PE=2 SV=1	7301927	KOG2332	Ferritin	K00522//ferritin heavy chain [EC:1.16.3.2]	cme:CYME_CMP227C	GO:0044763//single-organism cellular process;GO:0050789//regulation of biological process;GO:0048519//negative regulation of biological process;GO:0048523//negative regulation of cellular process;GO:0008285//negative regulation of cell proliferation;GO:0008219//cell death;GO:0070265//necrotic cell death;GO:0065007//biological regulation;GO:0050794//regulation of cellular process;GO:0051179//local…	GO:0005488//binding;GO:0043169//cation binding;GO:0046872//metal ion binding;GO:0043167//ion binding	GO:0043227//membrane-bounded organelle;GO:0043226//organelle;GO:0005623//cell
Unigene001716	261	--	--	--	--	--	--	--	--	--	--	--	-	-	-
Unigene001717	211	--	--	--	--	--	--	--	--	--	--	--	-	-	-
Unigene001718	284	--	--	--	--	--	--	--	--	--	--	--	-	-	-
Unigene001719	224	--	--	--	--	--	--	--	--	--	--	--	-	-	-
Unigene001720	222	AT5G08180.2	Ribosomal protein L7Ae/L30e/S12e/Gadd45 family protein|Chr5:2631843-2633374 REVERSE LENGTH=156	XP_461180.1	DEHA2F19228p [Debaryomyces hansenii CBS767]// CAG89568.1 DEHA2F19228p [Debaryomyces hansenii CBS767]	sp|P32495|NHP2_YEAST	H/ACA ribonucleoprotein complex subunit 2 OS=Saccharomyces cerevisiae (strain ATCC 204508 / S288c) GN=NHP2 PE=1 SV=2	YDL208w	KOG3167	Box H/ACA snoRNP component, involved in ribosomal RNA pseudouridinylation	K11129//H/ACA ribonucleoprotein complex subunit 2	cre:CHLREDRAFT_193640	-	-	-
Unigene001721	312	--	--	--	--	--	--	--	--	--	--	--	-	-	-
Unigene001722	223	AT1G62930.1	Tetratricopeptide repeat (TPR)-like superfamily protein|Chr1:23306534-23308423 FORWARD LENGTH=629	KVH91312.1	Pentatricopeptide repeat-containing protein [Cynara cardunculus var. scolymus]	sp|Q9LQ14|PPR96_ARATH	Pentatricopeptide repeat-containing protein At1g62930, chloroplastic OS=Arabidopsis thaliana GN=At1g62930 PE=2 SV=2	At1g63320	KOG4197	FOG: PPR repeat	K17710//pentatricopeptide repeat domain-containing protein 1	sot:102594510	-	-	-
Unigene001723	510	--	--	--	--	--	--	--	--	--	--	--	-	-	-
Unigene001724	346	AT5G02490.1	Heat shock protein 70 (Hsp 70) family protein|Chr5:550296-552565 REVERSE LENGTH=653	KND94150.1	Heat shock 70 kDa protein [Tolypocladium ophioglossoides CBS 100239]	sp|P78983|HSP70_ALTAL	Heat shock 70 kDa protein (Fragment) OS=Alternaria alternata GN=HSP70 PE=1 SV=2	SPAC13G7.02c	KOG0101	Molecular chaperones HSP70/HSC70, HSP70 superfamily	K03283//heat shock 70kDa protein 1/8	pmum:103328220	GO:0006605//protein targeting;GO:0006613//cotranslational protein targeting to membrane;GO:0033365//protein localization to organelle;GO:0006612//protein targeting to membrane;GO:0071840//cellular component organization or biogenesis;GO:0006886//intracellular protein transport;GO:0072599//establishment of protein localization to endoplasmic reticulum;GO:0045047//protein targeting to ER;GO:0051641…	GO:1901363//heterocyclic compound binding;GO:0036094//small molecule binding;GO:0005488//binding;GO:0097367//carbohydrate derivative binding;GO:0032550//purine ribonucleoside binding;GO:0032549//ribonucleoside binding;GO:0001883//purine nucleoside binding;GO:0001882//nucleoside binding;GO:0097159//organic cyclic compound binding;GO:0005515//protein binding	GO:0044424//intracellular part;GO:0043226//organelle;GO:0043229//intracellular organelle;GO:0043231//intracellular membrane-bounded organelle;GO:0044464//cell part;GO:0043227//membrane-bounded organelle;GO:0005622//intracellular;GO:0005623//cell
Unigene001725	634	--	--	--	--	--	--	--	--	--	--	--	-	-	-
Unigene001726	255	--	--	--	--	--	--	--	--	--	--	--	-	-	-
Unigene001727	227	--	--	--	--	--	--	--	--	--	--	--	-	-	-
Unigene001728	622	--	--	--	--	--	--	--	--	--	--	--	-	-	-
Unigene001729	334	--	--	--	--	--	--	--	--	--	--	--	-	-	-
Unigene001730	286	--	--	--	--	--	--	--	--	--	--	--	-	-	-
Unigene001731	306	--	--	--	--	--	--	--	--	--	--	--	-	-	-
Unigene001732	2006	AT5G54380.1	protein kinase family protein|Chr5:22077313-22079880 REVERSE LENGTH=855	XP_017259036.1	PREDICTED: receptor-like serine/threonine-protein kinase At3g01300 [Daucus carota subsp. sativus]	sp|Q9LK35|THE1_ARATH	Receptor-like protein kinase THESEUS 1 OS=Arabidopsis thaliana GN=THE1 PE=1 SV=1	At5g54380	KOG1187	Serine/threonine protein kinase	--	--	-	-	-
Unigene001733	247	--	--	--	--	--	--	--	--	--	--	--	-	-	-
Unigene001734	914	ATMG00860.1	DNA/RNA polymerases superfamily protein|ChrM:235916-236392 FORWARD LENGTH=158	AAL59229.1	gag-pol [Zea mays]	sp|Q8I7P9|POL5_DROME	Retrovirus-related Pol polyprotein from transposon opus OS=Drosophila melanogaster GN=pol PE=3 SV=1	At2g14650	KOG0017	FOG: Transposon-encoded proteins with TYA, reverse transcriptase, integrase domains in various combinations	--	--	-	-	-
Unigene001735	221	--	--	--	--	--	--	--	--	--	--	--	-	-	-
Unigene001736	274	--	--	--	--	--	--	--	--	--	--	--	-	-	-
Unigene001737	220	--	--	XP_016732157.1	PREDICTED: uncharacterized mitochondrial protein AtMg00860-like [Gossypium hirsutum]	--	--	At3g31970	KOG0017	FOG: Transposon-encoded proteins with TYA, reverse transcriptase, integrase domains in various combinations	--	--	GO:0006725//cellular aromatic compound metabolic process;GO:0006259//DNA metabolic process;GO:0044260//cellular macromolecule metabolic process;GO:0044238//primary metabolic process;GO:0071704//organic substance metabolic process;GO:0043170//macromolecule metabolic process;GO:0090304//nucleic acid metabolic process;GO:0006807//nitrogen compound metabolic process;GO:0009987//cellular process;GO:00…	-	-
Unigene001738	284	--	--	--	--	--	--	--	--	--	--	--	-	-	-
Unigene001739	228	AT1G53730.1	STRUBBELIG-receptor family 6|Chr1:20061771-20065475 FORWARD LENGTH=719	KVH91527.1	Leucine-rich repeat-containing protein [Cynara cardunculus var. scolymus]	sp|Q9C8M9|SRF6_ARATH	Protein STRUBBELIG-RECEPTOR FAMILY 6 OS=Arabidopsis thaliana GN=SRF6 PE=1 SV=1	At3g49750	KOG0619	FOG: Leucine rich repeat	--	--	-	-	-
Unigene001740	417	--	--	--	--	--	--	--	--	--	--	--	-	-	-
Unigene001741	243	--	--	XP_013449060.1	DUF674 family protein [Medicago truncatula]// KEH23087.1 DUF674 family protein [Medicago truncatula]	--	--	--	--	--	--	--	-	-	-
Unigene001742	300	--	--	--	--	--	--	--	--	--	--	--	-	-	-
Unigene001743	224	--	--	--	--	--	--	--	--	--	--	--	-	-	-
Unigene001744	285	--	--	--	--	--	--	--	--	--	--	--	-	-	-
Unigene001745	375	--	--	--	--	--	--	--	--	--	--	--	-	-	-
Unigene001746	304	AT3G25400.1	dCTP pyrophosphatase-like protein|Chr3:9213236-9214144 FORWARD LENGTH=141	XP_002281616.1	PREDICTED: dCTP pyrophosphatase 1 [Vitis vinifera]	sp|Q9QY93|DCTP1_MOUSE	dCTP pyrophosphatase 1 OS=Mus musculus GN=Dctpp1 PE=1 SV=1	--	--	--	--	--	-	-	-
Unigene001747	414	--	--	--	--	--	--	--	--	--	--	--	-	-	-
Unigene001748	314	--	--	--	--	--	--	--	--	--	--	--	-	-	-
Unigene001749	560	AT5G60620.1	glycerol-3-phosphate acyltransferase 9|Chr5:24367266-24369647 FORWARD LENGTH=376	XP_020232432.1	glycerol-3-phosphate acyltransferase 3-like [Cajanus cajan]	sp|Q8C0N2|GPAT3_MOUSE	Glycerol-3-phosphate acyltransferase 3 OS=Mus musculus GN=Gpat3 PE=1 SV=1	At5g60620	KOG2898	Predicted phosphate acyltransferase, contains PlsC domain	K13506//glycerol-3-phosphate O-acyltransferase 3/4 [EC:2.3.1.15]	jcu:105630072	-	GO:0016746//transferase activity, transferring acyl groups;GO:0016747//transferase activity, transferring acyl groups other than amino-acyl groups;GO:0008374//O-acyltransferase activity;GO:0016740//transferase activity;GO:0003824//catalytic activity	GO:0016020//membrane;GO:0031224//intrinsic component of membrane;GO:0044425//membrane part
Unigene001750	504	AT1G51500.1	ABC-2 type transporter family protein|Chr1:19097967-19100972 REVERSE LENGTH=687	KVH93406.1	AAA+ ATPase domain-containing protein [Cynara cardunculus var. scolymus]	sp|Q9C8K2|AB12G_ARATH	ABC transporter G family member 12 OS=Arabidopsis thaliana GN=ABCG12 PE=1 SV=1	At1g51500	KOG0061	Transporter, ABC superfamily (Breast cancer resistance protein)	--	--	-	-	-
Unigene001751	285	--	--	--	--	--	--	--	--	--	--	--	-	-	-
Unigene001752	396	AT1G50310.1	sugar transporter 9|Chr1:18635984-18638110 FORWARD LENGTH=517	KIJ16536.1	L-arabinose isomerase [Paxillus involutus ATCC 200175]	sp|P10870|SNF3_YEAST	High-affinity glucose transporter SNF3 OS=Saccharomyces cerevisiae (strain ATCC 204508 / S288c) GN=SNF3 PE=1 SV=3	YDL194w	KOG0254	Predicted transporter (major facilitator superfamily)	--	--	GO:0044699//single-organism process;GO:0051234//establishment of localization;GO:0051179//localization;GO:0009987//cellular process;GO:0044763//single-organism cellular process	GO:0022857//transmembrane transporter activity;GO:0005215//transporter activity	GO:0044425//membrane part;GO:0016020//membrane;GO:0031224//intrinsic component of membrane
Unigene001753	230	AT5G46060.1	spastin%2C putative (Protein of unknown function%2C DUF599)|Chr5:18681533-18682459 FORWARD LENGTH=248	GAV75086.1	DUF599 domain-containing protein [Cephalotus follicularis]	--	--	--	--	--	--	--	-	-	-
Unigene001754	213	--	--	--	--	--	--	--	--	--	--	--	-	-	-
Unigene001755	1014	--	--	--	--	--	--	--	--	--	--	--	-	-	-
Unigene001756	365	--	--	--	--	--	--	--	--	--	--	--	-	-	-
Unigene001757	313	--	--	--	--	--	--	--	--	--	--	--	-	-	-
Unigene001758	243	--	--	--	--	--	--	--	--	--	--	--	-	-	-
Unigene001759	323	--	--	--	--	--	--	--	--	--	--	--	-	-	-
Unigene001760	387	--	--	--	--	--	--	--	--	--	--	--	-	-	-
Unigene001761	235	--	--	--	--	--	--	--	--	--	--	--	-	-	-
Unigene001762	569	--	--	--	--	--	--	--	--	--	--	--	-	-	-
Unigene001763	216	--	--	--	--	--	--	--	--	--	--	--	-	-	-
Unigene001764	317	AT2G27120.1	DNA polymerase epsilon catalytic subunit|Chr2:11581223-11594346 FORWARD LENGTH=2138	XP_002269920.2	PREDICTED: DNA polymerase epsilon catalytic subunit A [Vitis vinifera]	sp|F4IFN6|DPOE2_ARATH	DNA polymerase epsilon catalytic subunit B OS=Arabidopsis thaliana GN=POL2B PE=2 SV=1	At2g27120	KOG1798	DNA polymerase epsilon, catalytic subunit A	K02324//DNA polymerase epsilon subunit 1 [EC:2.7.7.7]	vvi:100241432	-	-	-
Unigene001765	364	AT5G50400.2	purple acid phosphatase 27|Chr5:20523575-20525915 REVERSE LENGTH=539	XP_018854143.1	PREDICTED: nucleotide pyrophosphatase/phosphodiesterase-like [Juglans regia]	sp|Q687E1|NPP_HORVU	Nucleotide pyrophosphatase/phosphodiesterase (Fragments) OS=Hordeum vulgare GN=npp PE=1 SV=2	At5g50400	KOG1378	Purple acid phosphatase	--	--	GO:0009987//cellular process;GO:0006796//phosphate-containing compound metabolic process;GO:0006793//phosphorus metabolic process;GO:0044237//cellular metabolic process;GO:0008152//metabolic process	GO:0043169//cation binding;GO:0043167//ion binding;GO:0005488//binding;GO:0003824//catalytic activity	-
Unigene001766	223	--	--	--	--	--	--	--	--	--	--	--	-	-	-
Unigene001767	661	--	--	--	--	--	--	--	--	--	--	--	-	-	-
Unigene001768	644	--	--	--	--	--	--	--	--	--	--	--	-	-	-
Unigene001769	250	--	--	--	--	--	--	--	--	--	--	--	-	-	-
Unigene001770	325	--	--	--	--	--	--	--	--	--	--	--	-	-	-
Unigene001771	1179	--	--	--	--	--	--	--	--	--	--	--	-	-	-
Unigene001772	1354	--	--	--	--	--	--	--	--	--	--	--	-	-	-
Unigene001773	404	--	--	--	--	--	--	--	--	--	--	--	-	-	-
Unigene001774	583	--	--	--	--	--	--	--	--	--	--	--	-	-	-
Unigene001775	212	--	--	--	--	--	--	--	--	--	--	--	-	-	-
Unigene001776	369	--	--	CAE04422.2	OSJNBb0040D15.12 [Oryza sativa Japonica Group]	sp|P10978|POLX_TOBAC	Retrovirus-related Pol polyprotein from transposon TNT 1-94 OS=Nicotiana tabacum PE=2 SV=1	At2g10610	KOG0017	FOG: Transposon-encoded proteins with TYA, reverse transcriptase, integrase domains in various combinations	--	--	-	-	-
Unigene001777	256	--	--	--	--	--	--	--	--	--	--	--	-	-	-
Unigene001778	290	--	--	--	--	--	--	--	--	--	--	--	-	-	-
Unigene001779	575	--	--	--	--	--	--	--	--	--	--	--	-	-	-
Unigene001780	418	AT1G25500.3	Plasma-membrane choline transporter family protein|Chr1:8955437-8957294 REVERSE LENGTH=430	XP_016548134.1	PREDICTED: CTL-like protein DDB_G0274487 [Capsicum annuum]	--	--	At1g25500	KOG1362	Choline transporter-like protein	--	--	-	-	-
Unigene001781	329	--	--	--	--	--	--	--	--	--	--	--	-	-	-
Unigene001782	290	--	--	--	--	--	--	--	--	--	--	--	-	-	-
Unigene001783	404	AT3G08530.1	Clathrin%2C heavy chain|Chr3:2587171-2595411 REVERSE LENGTH=1703	AFN87703.1	clathrin heavy chain 2, partial [Nicotiana tabacum]	sp|Q2RBN7|CLH1_ORYSJ	Clathrin heavy chain 1 OS=Oryza sativa subsp. japonica GN=Os11g0104900 PE=3 SV=1	At3g08530	KOG0985	Vesicle coat protein clathrin, heavy chain	K04646//clathrin heavy chain	zma:100193501	GO:0015031//protein transport;GO:0006810//transport;GO:0051234//establishment of localization;GO:0071702//organic substance transport;GO:0008104//protein localization;GO:0033036//macromolecule localization;GO:0045184//establishment of protein localization;GO:0051179//localization	-	GO:0030136//clathrin-coated vesicle;GO:0030659//cytoplasmic vesicle membrane;GO:0098805//whole membrane;GO:0044446//intracellular organelle part;GO:0016023//cytoplasmic, membrane-bounded vesicle;GO:0030665//clathrin-coated vesicle membrane;GO:0044424//intracellular part;GO:0005622//intracellular;GO:0012505//endomembrane system;GO:0044444//cytoplasmic part;GO:0044464//cell part;GO:0044425//membran…
Unigene001784	373	AT2G25790.1	Leucine-rich receptor-like protein kinase family protein|Chr2:11000631-11004031 FORWARD LENGTH=960	KVH99858.1	Leucine-rich repeat-containing protein [Cynara cardunculus var. scolymus]	sp|O82318|Y2579_ARATH	Probably inactive leucine-rich repeat receptor-like protein kinase At2g25790 OS=Arabidopsis thaliana GN=At2g25790 PE=2 SV=1	At1g58190	KOG0619	FOG: Leucine rich repeat	--	--	-	-	-
Unigene001785	562	ATMG00860.1	DNA/RNA polymerases superfamily protein|ChrM:235916-236392 FORWARD LENGTH=158	KYP32787.1	Retrovirus-related Pol polyprotein from transposon 297 family, partial [Cajanus cajan]	sp|P20825|POL2_DROME	Retrovirus-related Pol polyprotein from transposon 297 OS=Drosophila melanogaster GN=pol PE=3 SV=1	At1g35370_2	KOG0017	FOG: Transposon-encoded proteins with TYA, reverse transcriptase, integrase domains in various combinations	--	--	-	-	-
Unigene001786	611	AT4G28190.1	Developmental regulator%2C ULTRAPETALA|Chr4:13985753-13987050 FORWARD LENGTH=237	KVH96571.1	SAND domain-containing protein [Cynara cardunculus var. scolymus]	sp|Q8GZA8|ULT1_ARATH	Protein ULTRAPETALA 1 OS=Arabidopsis thaliana GN=ULT1 PE=1 SV=1	--	--	--	--	--	-	-	-
Unigene001787	263	--	--	XP_012048354.1	arsenical-resistance protein [Cryptococcus neoformans var. grubii H99]// AFR94182.1 arsenical-resistance protein [Cryptococcus neoformans var. grubii H99]	sp|P45946|ARSB_BACSU	Arsenite resistance protein ArsB OS=Bacillus subtilis (strain 168) GN=arsB PE=3 SV=2	--	--	--	K03325//arsenite transporter, ACR3 family	csl:COCSUDRAFT_14170	GO:0006811//ion transport;GO:0051179//localization;GO:0044699//single-organism process;GO:0006820//anion transport;GO:0051234//establishment of localization;GO:0009987//cellular process;GO:0044763//single-organism cellular process;GO:0006810//transport	GO:0005215//transporter activity;GO:0015291//secondary active transmembrane transporter activity;GO:0022804//active transmembrane transporter activity;GO:0022857//transmembrane transporter activity	GO:0016020//membrane;GO:0044425//membrane part;GO:0031224//intrinsic component of membrane
Unigene001788	246	--	--	--	--	--	--	--	--	--	--	--	-	-	-
Unigene001789	345	--	--	--	--	--	--	--	--	--	--	--	-	-	-
Unigene001790	399	AT5G40460.1	cyclin-dependent kinase inhibitor SMR3-like protein|Chr5:16202465-16202803 FORWARD LENGTH=112	XP_010251100.1	PREDICTED: cyclin-dependent protein kinase inhibitor SMR3 [Nelumbo nucifera]	--	--	--	--	--	--	--	-	-	-
Unigene001791	225	--	--	--	--	--	--	--	--	--	--	--	-	-	-
Unigene001792	252	--	--	--	--	--	--	--	--	--	--	--	-	-	-
Unigene001793	488	--	--	--	--	--	--	--	--	--	--	--	-	-	-
Unigene001794	492	--	--	--	--	--	--	--	--	--	--	--	-	-	-
Unigene001795	646	--	--	--	--	--	--	--	--	--	--	--	-	-	-
Unigene001796	270	--	--	--	--	--	--	--	--	--	--	--	-	-	-
Unigene001797	323	AT1G53430.2	Leucine-rich repeat transmembrane protein kinase|Chr1:19936073-19940959 FORWARD LENGTH=997	KVH79568.1	Concanavalin A-like lectin/glucanase, subgroup [Cynara cardunculus var. scolymus]	sp|C0LGG9|Y5344_ARATH	Probable LRR receptor-like serine/threonine-protein kinase At1g53440 OS=Arabidopsis thaliana GN=At1g53440 PE=2 SV=2	--	--	--	--	--	-	-	-
Unigene001798	296	--	--	--	--	--	--	--	--	--	--	--	-	-	-
Unigene001799	313	--	--	--	--	--	--	--	--	--	--	--	-	-	-
Unigene001800	237	AT1G01920.1	SET domain-containing protein|Chr1:316204-319507 FORWARD LENGTH=572	KVH89138.1	Rubisco LS methyltransferase, substrate-binding domain-containing protein [Cynara cardunculus var. scolymus]	--	--	At1g01920	KOG1337	N-methyltransferase	--	--	-	-	-
Unigene001801	374	AT3G25500.1	formin homology 1|Chr3:9251320-9254826 REVERSE LENGTH=1051	KVI03766.1	Actin-binding FH2 [Cynara cardunculus var. scolymus]	sp|Q9SE97|FH1_ARATH	Formin-like protein 1 OS=Arabidopsis thaliana GN=FH1 PE=1 SV=1	At3g25500	KOG1922	Rho GTPase effector BNI1 and related formins	--	--	-	-	GO:0044425//membrane part;GO:0016020//membrane;GO:0031224//intrinsic component of membrane
Unigene001802	671	--	--	--	--	--	--	--	--	--	--	--	-	-	-
Unigene001803	263	--	--	--	--	--	--	--	--	--	--	--	-	-	-
Unigene001804	311	--	--	--	--	--	--	--	--	--	--	--	-	-	-
Unigene001805	237	--	--	--	--	--	--	--	--	--	--	--	-	-	-
Unigene001806	791	AT4G31800.1	WRKY DNA-binding protein 18|Chr4:15383296-15384812 FORWARD LENGTH=310	KVH91623.1	DNA-binding WRKY, partial [Cynara cardunculus var. scolymus]	sp|Q9C5T4|WRK18_ARATH	WRKY transcription factor 18 OS=Arabidopsis thaliana GN=WRKY18 PE=1 SV=2	--	--	--	--	--	-	-	-
Unigene001807	334	--	--	--	--	--	--	--	--	--	--	--	-	-	-
Unigene001808	248	--	--	--	--	--	--	--	--	--	--	--	-	-	-
Unigene001809	352	--	--	--	--	--	--	--	--	--	--	--	-	-	-
Unigene001810	270	AT3G04120.1	glyceraldehyde-3-phosphate dehydrogenase C subunit 1|Chr3:1081077-1083131 FORWARD LENGTH=338	AGE45721.1	glyceraldehyde-3-phosphate dehydrogenase, partial [Cladia aggregata]	sp|Q1DTF9|G3P_COCIM	Glyceraldehyde-3-phosphate dehydrogenase OS=Coccidioides immitis (strain RS) GN=GPD PE=3 SV=1	At3g04120	KOG0657	Glyceraldehyde 3-phosphate dehydrogenase	K00134//glyceraldehyde 3-phosphate dehydrogenase [EC:1.2.1.12]	egu:105051363	GO:0005975//carbohydrate metabolic process;GO:0019318//hexose metabolic process;GO:0044281//small molecule metabolic process;GO:0006082//organic acid metabolic process;GO:0008152//metabolic process;GO:0044238//primary metabolic process;GO:0006090//pyruvate metabolic process;GO:0044763//single-organism cellular process;GO:0044237//cellular metabolic process;GO:0043436//oxoacid metabolic process;GO…	GO:1901363//heterocyclic compound binding;GO:0016491//oxidoreductase activity;GO:0005488//binding;GO:0000166//nucleotide binding;GO:0003824//catalytic activity;GO:1901265//nucleoside phosphate binding;GO:0016903//oxidoreductase activity, acting on the aldehyde or oxo group of donors;GO:0036094//small molecule binding;GO:0097159//organic cyclic compound binding	-
Unigene001811	315	--	--	--	--	--	--	--	--	--	--	--	-	-	-
Unigene001812	295	--	--	--	--	--	--	--	--	--	--	--	-	-	-
Unigene001813	217	--	--	JAU21819.1	Retrovirus-related Pol polyprotein from transposon TNT 1-94, partial [Noccaea caerulescens]	sp|P04146|COPIA_DROME	Copia protein OS=Drosophila melanogaster GN=GIP PE=1 SV=3	At1g21945	KOG0017	FOG: Transposon-encoded proteins with TYA, reverse transcriptase, integrase domains in various combinations	--	--	-	-	-
Unigene001814	375	--	--	--	--	--	--	--	--	--	--	--	-	-	-
Unigene001815	1305	--	--	--	--	--	--	--	--	--	--	--	-	-	-
Unigene001816	254	--	--	--	--	--	--	--	--	--	--	--	-	-	-
Unigene001817	238	--	--	--	--	--	--	--	--	--	--	--	-	-	-
Unigene001818	465	--	--	--	--	--	--	--	--	--	--	--	-	-	-
Unigene001819	458	--	--	--	--	--	--	--	--	--	--	--	-	-	-
Unigene001820	301	--	--	--	--	--	--	--	--	--	--	--	-	-	-
Unigene001821	243	--	--	--	--	--	--	--	--	--	--	--	-	-	-
Unigene001822	274	--	--	--	--	--	--	--	--	--	--	--	-	-	-
Unigene001823	209	--	--	--	--	--	--	--	--	--	--	--	-	-	-
Unigene001824	211	--	--	--	--	--	--	--	--	--	--	--	-	-	-
Unigene001825	221	AT3G02330.1	Pentatricopeptide repeat (PPR) superfamily protein|Chr3:473881-476592 REVERSE LENGTH=903	XP_011099068.1	PREDICTED: pentatricopeptide repeat-containing protein At3g02330 [Sesamum indicum]	sp|Q9FWA6|PP207_ARATH	Pentatricopeptide repeat-containing protein At3g02330 OS=Arabidopsis thaliana GN=PCMP-E90 PE=2 SV=2	At3g02330	KOG4197	FOG: PPR repeat	--	--	-	-	-
Unigene001826	1213	AT1G14550.1	Peroxidase superfamily protein|Chr1:4979028-4980324 FORWARD LENGTH=321	XP_002269058.1	PREDICTED: lignin-forming anionic peroxidase [Vitis vinifera]	sp|Q4W1I9|PER2_ZINVI	Basic peroxidase OS=Zinnia violacea GN=POD3 PE=1 SV=1	--	--	--	K00430//peroxidase [EC:1.11.1.7]	vvi:100263220	GO:0044699//single-organism process;GO:0008152//metabolic process;GO:0009987//cellular process;GO:0050896//response to stimulus;GO:0044710//single-organism metabolic process	GO:0005488//binding	-
Unigene001827	876	--	--	--	--	--	--	--	--	--	--	--	-	-	-
Unigene001828	318	--	--	--	--	--	--	--	--	--	--	--	-	-	-
Unigene001829	227	--	--	--	--	--	--	--	--	--	--	--	-	-	-
Unigene001830	308	AT5G55830.1	Concanavalin A-like lectin protein kinase family protein|Chr5:22594655-22596700 FORWARD LENGTH=681	KVI10415.1	Concanavalin A-like lectin/glucanase superfamily [Cynara cardunculus var. scolymus]	sp|Q9FHG4|LRKS7_ARATH	Probable L-type lectin-domain containing receptor kinase S.7 OS=Arabidopsis thaliana GN=LECRKS7 PE=2 SV=1	At2g45590	KOG1187	Serine/threonine protein kinase	--	--	-	-	-
Unigene001831	377	--	--	--	--	--	--	--	--	--	--	--	-	-	-
Unigene001832	433	--	--	--	--	--	--	--	--	--	--	--	-	-	-
Unigene001833	231	ATMG00810.1	DNA/RNA polymerases superfamily protein|ChrM:227709-228431 REVERSE LENGTH=240	KYP64898.1	Retrovirus-related Pol polyprotein from transposon TNT 1-94 [Cajanus cajan]	sp|P92519|M810_ARATH	Uncharacterized mitochondrial protein AtMg00810 OS=Arabidopsis thaliana GN=AtMg00810 PE=4 SV=1	At2g04820	KOG0017	FOG: Transposon-encoded proteins with TYA, reverse transcriptase, integrase domains in various combinations	--	--	-	-	-
Unigene001834	871	--	--	--	--	--	--	--	--	--	--	--	-	-	-
Unigene001835	746	--	--	--	--	--	--	--	--	--	--	--	-	-	-
Unigene001836	395	--	--	--	--	--	--	--	--	--	--	--	-	-	-
Unigene001837	316	--	--	--	--	--	--	--	--	--	--	--	-	-	-
Unigene001838	282	AT1G11260.1	sugar transporter 1|Chr1:3777460-3780133 FORWARD LENGTH=522	XP_009614842.1	PREDICTED: sugar transport protein 12-like [Nicotiana tomentosiformis]// XP_009614843.1 PREDICTED: sugar transport protein 12-like [Nicotiana tomentosiformis]// XP_016474706.1 PREDICTED: sugar transport protein 12-like [Nicotiana tabacum]	sp|Q41144|STC_RICCO	Sugar carrier protein C OS=Ricinus communis GN=STC PE=2 SV=1	At1g11260	KOG0254	Predicted transporter (major facilitator superfamily)	--	--	GO:0006810//transport;GO:0071702//organic substance transport;GO:0015758//glucose transport;GO:0044763//single-organism cellular process;GO:0008643//carbohydrate transport;GO:0015749//monosaccharide transport;GO:0008645//hexose transport;GO:0044699//single-organism process;GO:0051179//localization;GO:1902578//single-organism localization;GO:0006818//hydrogen transport;GO:0051234//establishment of…	GO:0005215//transporter activity;GO:0022891//substrate-specific transmembrane transporter activity;GO:1901476//carbohydrate transporter activity;GO:0022857//transmembrane transporter activity;GO:0022892//substrate-specific transporter activity;GO:0015144//carbohydrate transmembrane transporter activity	GO:0031224//intrinsic component of membrane;GO:0016020//membrane;GO:0044425//membrane part
Unigene001839	243	--	--	--	--	--	--	--	--	--	--	--	-	-	-
Unigene001840	228	--	--	--	--	--	--	--	--	--	--	--	-	-	-
Unigene001841	250	--	--	--	--	--	--	--	--	--	--	--	-	-	-
Unigene001842	201	--	--	--	--	--	--	--	--	--	--	--	-	-	-
Unigene001843	409	AT1G80840.1	WRKY DNA-binding protein 40|Chr1:30383834-30385356 FORWARD LENGTH=302	ADI56655.1	WRKY transcription factor [Artemisia annua]	sp|Q9SAH7|WRK40_ARATH	Probable WRKY transcription factor 40 OS=Arabidopsis thaliana GN=WRKY40 PE=1 SV=1	--	--	--	--	--	-	-	-
Unigene001844	247	--	--	XP_010097937.1	Retrovirus-related Pol polyprotein from transposon TNT 1-94 [Morus notabilis]// EXB73293.1 Retrovirus-related Pol polyprotein from transposon TNT 1-94 [Morus notabilis]	sp|P10978|POLX_TOBAC	Retrovirus-related Pol polyprotein from transposon TNT 1-94 OS=Nicotiana tabacum PE=2 SV=1	At4g21360	KOG0017	FOG: Transposon-encoded proteins with TYA, reverse transcriptase, integrase domains in various combinations	--	--	-	-	-
Unigene001845	245	--	--	--	--	--	--	--	--	--	--	--	-	-	-
Unigene001846	278	--	--	--	--	--	--	--	--	--	--	--	-	-	-
Unigene001847	228	--	--	--	--	--	--	--	--	--	--	--	-	-	-
Unigene001848	445	--	--	--	--	--	--	--	--	--	--	--	-	-	-
Unigene001849	271	--	--	--	--	--	--	--	--	--	--	--	-	-	-
Unigene001850	284	--	--	--	--	--	--	--	--	--	--	--	-	-	-
Unigene001851	436	--	--	--	--	--	--	--	--	--	--	--	-	-	-
Unigene001852	226	--	--	--	--	--	--	--	--	--	--	--	-	-	-
Unigene001853	570	--	--	--	--	--	--	--	--	--	--	--	-	-	-
Unigene001854	255	--	--	--	--	--	--	--	--	--	--	--	-	-	-
Unigene001855	589	--	--	--	--	--	--	--	--	--	--	--	-	-	-
Unigene001856	279	--	--	--	--	--	--	--	--	--	--	--	-	-	-
Unigene001857	226	--	--	--	--	--	--	--	--	--	--	--	-	-	-
Unigene001858	257	AT4G18840.3	Pentatricopeptide repeat (PPR-like) superfamily protein|Chr4:10338719-10340356 REVERSE LENGTH=545	KVI00210.1	Pentatricopeptide repeat-containing protein [Cynara cardunculus var. scolymus]	sp|O49399|PP321_ARATH	Pentatricopeptide repeat-containing protein At4g18840 OS=Arabidopsis thaliana GN=PCMP-E101 PE=3 SV=2	At4g18840	KOG4197	FOG: PPR repeat	--	--	-	-	-
Unigene001859	351	--	--	--	--	--	--	--	--	--	--	--	-	-	-
Unigene001860	230	--	--	--	--	--	--	--	--	--	--	--	-	-	-
Unigene001861	258	--	--	--	--	--	--	--	--	--	--	--	-	-	-
Unigene001862	403	--	--	--	--	--	--	--	--	--	--	--	-	-	-
Unigene001863	236	--	--	--	--	--	--	--	--	--	--	--	-	-	-
Unigene001864	215	--	--	--	--	--	--	--	--	--	--	--	-	-	-
Unigene001865	456	--	--	--	--	--	--	--	--	--	--	--	-	-	-
Unigene001866	1187	--	--	--	--	--	--	--	--	--	--	--	-	-	-
Unigene001867	346	--	--	--	--	--	--	--	--	--	--	--	-	-	-
Unigene001868	442	--	--	--	--	--	--	--	--	--	--	--	-	-	-
Unigene001869	270	--	--	--	--	--	--	--	--	--	--	--	-	-	-
Unigene001870	502	AT4G13395.1	ROTUNDIFOLIA like 12|Chr4:7785883-7786050 REVERSE LENGTH=55	CDY56071.1	BnaC08g47130D [Brassica napus]	--	--	--	--	--	--	--	-	-	-
Unigene001871	766	AT3G55010.2	phosphoribosylformylglycinamidine cyclo-ligase%2C chloroplast / phosphoribosyl-aminoimidazole synthetase / AIR synthase (PUR5)|Chr3:20386818-20388549 FORWARD LENGTH=389	KVH91098.1	AIR synthase-related protein, C-terminal domain-containing protein [Cynara cardunculus var. scolymus]	sp|P52424|PUR5_VIGUN	Phosphoribosylformylglycinamidine cyclo-ligase, chloroplastic/mitochondrial OS=Vigna unguiculata GN=PUR5 PE=2 SV=1	At3g55010	KOG0237	Glycinamide ribonucleotide synthetase (GARS)/Aminoimidazole ribonucleotide synthetase (AIRS)	K01933//phosphoribosylformylglycinamidine cyclo-ligase [EC:6.3.3.1]	sly:101246417	GO:0009259//ribonucleotide metabolic process;GO:0006793//phosphorus metabolic process;GO:0009161//ribonucleoside monophosphate metabolic process;GO:0044699//single-organism process;GO:0009165//nucleotide biosynthetic process;GO:0009152//purine ribonucleotide biosynthetic process;GO:0044271//cellular nitrogen compound biosynthetic process;GO:0034654//nucleobase-containing compound biosynthetic pro…	GO:0003824//catalytic activity	GO:0044424//intracellular part;GO:0044464//cell part;GO:0005622//intracellular;GO:0005623//cell
Unigene001872	280	--	--	--	--	--	--	--	--	--	--	--	-	-	-
Unigene001873	717	--	--	--	--	--	--	--	--	--	--	--	-	-	-
Unigene001874	479	--	--	--	--	--	--	--	--	--	--	--	-	-	-
Unigene001875	217	--	--	--	--	--	--	--	--	--	--	--	-	-	-
Unigene001876	229	--	--	GAV99000.1	vacuolar transporter chaperone 1 [Lentinula edodes]	sp|Q9UR17|VTC1_SCHPO	Vacuolar transporter chaperone 1 OS=Schizosaccharomyces pombe (strain 972 / ATCC 24843) GN=nrf1 PE=2 SV=1	SPBC21B10.04c	KOG4580	Component of vacuolar transporter chaperone (Vtc) involved in vacuole fusion	--	--	GO:0051649//establishment of localization in cell;GO:0051128//regulation of cellular component organization;GO:0051716//cellular response to stimulus;GO:0051179//localization;GO:0008360//regulation of cell shape;GO:0046907//intracellular transport;GO:0023052//signaling;GO:0022603//regulation of anatomical structure morphogenesis;GO:0061025//membrane fusion;GO:0044765//single-organism transport;GO…	GO:0030234//enzyme regulator activity;GO:0003676//nucleic acid binding;GO:0044822//poly(A) RNA binding;GO:0003723//RNA binding;GO:0098772//molecular function regulator;GO:0005488//binding;GO:0097159//organic cyclic compound binding;GO:1901363//heterocyclic compound binding;GO:0060589//nucleoside-triphosphatase regulator activity	GO:0005737//cytoplasm;GO:0098805//whole membrane;GO:0043229//intracellular organelle;GO:0044446//intracellular organelle part;GO:0044437//vacuolar part;GO:0043231//intracellular membrane-bounded organelle;GO:0031090//organelle membrane;GO:0031224//intrinsic component of membrane;GO:0005774//vacuolar membrane;GO:0044424//intracellular part;GO:0043234//protein complex;GO:0016020//membrane;GO:003299…
Unigene001877	312	--	--	--	--	--	--	--	--	--	--	--	-	-	-
Unigene001878	427	--	--	--	--	--	--	--	--	--	--	--	-	-	-
Unigene001879	430	--	--	--	--	--	--	--	--	--	--	--	-	-	-
Unigene001880	264	--	--	--	--	--	--	--	--	--	--	--	-	-	-
Unigene001881	954	--	--	--	--	--	--	--	--	--	--	--	-	-	-
Unigene001882	1084	--	--	--	--	--	--	--	--	--	--	--	-	-	-
Unigene001883	323	--	--	--	--	--	--	--	--	--	--	--	-	-	-
Unigene001884	479	--	--	--	--	--	--	--	--	--	--	--	-	-	-
Unigene001885	301	--	--	--	--	--	--	--	--	--	--	--	-	-	-
Unigene001886	439	--	--	--	--	--	--	--	--	--	--	--	-	-	-
Unigene001887	232	--	--	--	--	--	--	--	--	--	--	--	-	-	-
Unigene001888	243	AT5G25190.1	Integrase-type DNA-binding superfamily protein|Chr5:8707007-8707655 REVERSE LENGTH=181	KVH90251.1	AP2/ERF domain-containing protein [Cynara cardunculus var. scolymus]	sp|Q94AW5|ERF03_ARATH	Ethylene-responsive transcription factor ERF003 OS=Arabidopsis thaliana GN=ERF003 PE=2 SV=1	--	--	--	--	--	-	-	-
Unigene001889	550	--	--	--	--	--	--	--	--	--	--	--	-	-	-
Unigene001890	209	--	--	--	--	--	--	--	--	--	--	--	-	-	-
Unigene001891	286	--	--	--	--	--	--	--	--	--	--	--	-	-	-
Unigene001892	229	--	--	--	--	--	--	--	--	--	--	--	-	-	-
Unigene001893	313	ATMG00810.1	DNA/RNA polymerases superfamily protein|ChrM:227709-228431 REVERSE LENGTH=240	XP_015697656.1	PREDICTED: uncharacterized mitochondrial protein AtMg00810-like [Oryza brachyantha]	sp|P92519|M810_ARATH	Uncharacterized mitochondrial protein AtMg00810 OS=Arabidopsis thaliana GN=AtMg00810 PE=4 SV=1	At4g02960	KOG0017	FOG: Transposon-encoded proteins with TYA, reverse transcriptase, integrase domains in various combinations	--	--	-	-	-
Unigene001894	435	--	--	--	--	--	--	--	--	--	--	--	-	-	-
Unigene001895	208	--	--	--	--	--	--	--	--	--	--	--	-	-	-
Unigene001896	424	--	--	--	--	--	--	--	--	--	--	--	-	-	-
Unigene001897	296	AT5G08490.7	Tetratricopeptide repeat (TPR)-like superfamily protein|Chr5:2745560-2747757 REVERSE LENGTH=701	XP_003602712.2	PPR containing plant-like protein [Medicago truncatula]// AES72963.2 PPR containing plant-like protein [Medicago truncatula]	sp|Q9SI53|PP147_ARATH	Pentatricopeptide repeat-containing protein At2g03880, mitochondrial OS=Arabidopsis thaliana GN=PCMP-H44 PE=2 SV=1	At5g08490	KOG4197	FOG: PPR repeat	--	--	-	-	-
Unigene001898	292	--	--	--	--	--	--	--	--	--	--	--	-	-	-
Unigene001899	375	--	--	--	--	--	--	--	--	--	--	--	-	-	-
Unigene001900	616	--	--	--	--	--	--	--	--	--	--	--	-	-	-
Unigene001901	207	--	--	--	--	--	--	--	--	--	--	--	-	-	-
Unigene001902	1312	AT1G35710.1	kinase family with leucine-rich repeat domain-containing protein|Chr1:13220940-13224386 FORWARD LENGTH=1120	XP_017218135.1	PREDICTED: probable leucine-rich repeat receptor-like protein kinase At1g35710 isoform X1 [Daucus carota subsp. sativus]	sp|Q9LP24|Y1571_ARATH	Probable leucine-rich repeat receptor-like protein kinase At1g35710 OS=Arabidopsis thaliana GN=At1g35710 PE=2 SV=1	At1g70740	KOG1187	Serine/threonine protein kinase	--	--	-	-	-
Unigene001903	220	--	--	--	--	--	--	--	--	--	--	--	-	-	-
Unigene001904	321	--	--	KND90778.1	Aconitate hydratase, mitochondrial [Tolypocladium ophioglossoides CBS 100239]	sp|D4AT77|ACON_ARTBC	Aconitate hydratase, mitochondrial OS=Arthroderma benhamiae (strain ATCC MYA-4681 / CBS 112371) GN=ARB_07441 PE=1 SV=1	YLR304c	KOG0453	Aconitase/homoaconitase (aconitase superfamily)	K01681//aconitate hydratase [EC:4.2.1.3]	gsl:Gasu_24420	GO:0044281//small molecule metabolic process;GO:0008152//metabolic process;GO:0044699//single-organism process;GO:0044237//cellular metabolic process;GO:0044710//single-organism metabolic process;GO:0071704//organic substance metabolic process;GO:0043436//oxoacid metabolic process;GO:0006101//citrate metabolic process;GO:0006082//organic acid metabolic process;GO:0009987//cellular process;GO:0019…	GO:0043169//cation binding;GO:1901363//heterocyclic compound binding;GO:0016836//hydro-lyase activity;GO:0051540//metal cluster binding;GO:0043167//ion binding;GO:0003824//catalytic activity;GO:0003677//DNA binding;GO:0016829//lyase activity;GO:0097159//organic cyclic compound binding;GO:0051536//iron-sulfur cluster binding;GO:0003676//nucleic acid binding;GO:0005488//binding;GO:0016835//carbon-o…	GO:0043227//membrane-bounded organelle;GO:0044429//mitochondrial part;GO:0005623//cell;GO:0005737//cytoplasm;GO:0005622//intracellular;GO:0005739//mitochondrion;GO:0044444//cytoplasmic part;GO:0044446//intracellular organelle part;GO:0043226//organelle;GO:0044464//cell part;GO:0044424//intracellular part;GO:0043229//intracellular organelle;GO:0044422//organelle part;GO:0043231//intracellular memb…
Unigene001905	363	--	--	--	--	--	--	--	--	--	--	--	-	-	-
Unigene001906	450	--	--	--	--	--	--	--	--	--	--	--	-	-	-
Unigene001907	204	--	--	--	--	--	--	--	--	--	--	--	-	-	-
Unigene001908	507	--	--	--	--	--	--	--	--	--	--	--	-	-	-
Unigene001909	217	--	--	KVH98382.1	hypothetical protein Ccrd_023382 [Cynara cardunculus var. scolymus]	--	--	--	--	--	--	--	-	-	-
Unigene001910	475	AT5G07480.1	KAR-UP oxidoreductase 1|Chr5:2367167-2369554 FORWARD LENGTH=356	KVH93400.1	Non-heme dioxygenase N-terminal domain-containing protein [Cynara cardunculus var. scolymus]	--	--	--	--	--	--	--	-	-	-
Unigene001911	201	--	--	--	--	--	--	--	--	--	--	--	-	-	-
Unigene001912	213	--	--	--	--	--	--	--	--	--	--	--	-	-	-
Unigene001913	350	--	--	--	--	--	--	--	--	--	--	--	-	-	-
Unigene001914	640	AT1G50180.1	NB-ARC domain-containing disease resistance protein|Chr1:18584235-18587136 FORWARD LENGTH=857	KVI04084.1	Disease resistance protein [Cynara cardunculus var. scolymus]	--	--	At1g50180	KOG4658	Apoptotic ATPase	--	--	-	-	-
Unigene001915	337	--	--	--	--	--	--	--	--	--	--	--	-	-	-
Unigene001916	253	--	--	--	--	--	--	--	--	--	--	--	-	-	-
Unigene001917	352	--	--	--	--	--	--	--	--	--	--	--	-	-	-
Unigene001918	237	--	--	--	--	--	--	--	--	--	--	--	-	-	-
Unigene001919	277	--	--	--	--	--	--	--	--	--	--	--	-	-	-
Unigene001920	691	--	--	--	--	--	--	--	--	--	--	--	-	-	-
Unigene001921	596	--	--	--	--	--	--	--	--	--	--	--	-	-	-
Unigene001922	474	--	--	--	--	--	--	--	--	--	--	--	-	-	-
Unigene001923	419	--	--	--	--	--	--	--	--	--	--	--	-	-	-
Unigene001924	243	--	--	--	--	--	--	--	--	--	--	--	-	-	-
Unigene001925	224	--	--	--	--	--	--	--	--	--	--	--	-	-	-
Unigene001926	271	--	--	--	--	--	--	--	--	--	--	--	-	-	-
Unigene001927	358	--	--	--	--	--	--	--	--	--	--	--	-	-	-
Unigene001928	247	ATMG00300.1	Gag-Pol-related retrotransposon family protein|ChrM:89617-90054 REVERSE LENGTH=145	AOZ57162.1	integrase, partial [Coccinia grandis]	sp|P10978|POLX_TOBAC	Retrovirus-related Pol polyprotein from transposon TNT 1-94 OS=Nicotiana tabacum PE=2 SV=1	At2g13930	KOG0017	FOG: Transposon-encoded proteins with TYA, reverse transcriptase, integrase domains in various combinations	K12619//5'-3' exoribonuclease 2 [EC:3.1.13.-]	obr:102707106	-	-	-
Unigene001929	480	AT1G79930.2	heat shock protein 91|Chr1:30063924-30067067 REVERSE LENGTH=789	XP_012053205.1	heat shock 70kDa protein 4 [Cryptococcus neoformans var. grubii H99]// AFR98435.1 heat shock 70kDa protein 4 [Cryptococcus neoformans var. grubii H99]	sp|O59838|HSP7F_SCHPO	Heat shock protein homolog pss1 OS=Schizosaccharomyces pombe (strain 972 / ATCC 24843) GN=pss1 PE=1 SV=2	YBR169c	KOG0103	Molecular chaperones HSP105/HSP110/SSE1, HSP70 superfamily	K09489//heat shock 70kDa protein 4	mus:103976454	-	GO:0001883//purine nucleoside binding;GO:0097367//carbohydrate derivative binding;GO:0032550//purine ribonucleoside binding;GO:0036094//small molecule binding;GO:0001882//nucleoside binding;GO:0005488//binding;GO:1901363//heterocyclic compound binding;GO:0097159//organic cyclic compound binding;GO:0032549//ribonucleoside binding	GO:0005737//cytoplasm;GO:0043231//intracellular membrane-bounded organelle;GO:0005622//intracellular;GO:0044424//intracellular part;GO:0043227//membrane-bounded organelle;GO:0043229//intracellular organelle;GO:0044444//cytoplasmic part;GO:0005623//cell;GO:0044464//cell part;GO:0043226//organelle
Unigene001930	481	--	--	--	--	--	--	--	--	--	--	--	-	-	-
Unigene001931	258	--	--	KYP77693.1	Retrovirus-related Pol polyprotein from transposon TNT 1-94 [Cajanus cajan]	sp|P10978|POLX_TOBAC	Retrovirus-related Pol polyprotein from transposon TNT 1-94 OS=Nicotiana tabacum PE=2 SV=1	At1g27285	KOG0017	FOG: Transposon-encoded proteins with TYA, reverse transcriptase, integrase domains in various combinations	--	--	-	-	-
Unigene001932	298	--	--	--	--	--	--	--	--	--	--	--	-	-	-
Unigene001933	322	--	--	--	--	--	--	--	--	--	--	--	-	-	-
Unigene001934	622	--	--	--	--	--	--	--	--	--	--	--	-	-	-
Unigene001935	350	--	--	--	--	--	--	--	--	--	--	--	-	-	-
Unigene001936	209	AT4G28390.2	ADP/ATP carrier 3|Chr4:14041486-14042781 REVERSE LENGTH=379	JAT57866.1	ADP,ATP carrier protein 1, partial [Anthurium amnicola]	sp|P51881|ADT2_MOUSE	ADP/ATP translocase 2 OS=Mus musculus GN=Slc25a5 PE=1 SV=3	Hs4502099	KOG0749	Mitochondrial ADP/ATP carrier proteins	K05863//solute carrier family 25 (mitochondrial adenine nucleotide translocator), member 4/5/6/31	gsl:Gasu_45710	GO:0044763//single-organism cellular process;GO:0051234//establishment of localization;GO:0044699//single-organism process;GO:0051179//localization;GO:0009987//cellular process	-	GO:0044446//intracellular organelle part;GO:0043229//intracellular organelle;GO:0044424//intracellular part;GO:0005623//cell;GO:0043227//membrane-bounded organelle;GO:0019866//organelle inner membrane;GO:0031967//organelle envelope;GO:0005622//intracellular;GO:0031090//organelle membrane;GO:0044425//membrane part;GO:0044422//organelle part;GO:0031975//envelope;GO:0031224//intrinsic component of m…
Unigene001937	231	AT1G74630.1	Tetratricopeptide repeat (TPR)-like superfamily protein|Chr1:28030521-28032452 FORWARD LENGTH=643	XP_015579483.1	PREDICTED: pentatricopeptide repeat-containing protein At1g74630 [Ricinus communis]	sp|Q9CA54|PP122_ARATH	Pentatricopeptide repeat-containing protein At1g74630 OS=Arabidopsis thaliana GN=PCMP-H71 PE=2 SV=1	At1g74630	KOG4197	FOG: PPR repeat	--	--	-	-	-
Unigene001938	434	AT5G51160.1	Ankyrin repeat family protein|Chr5:20792280-20793681 FORWARD LENGTH=442	KVI00541.1	Ankyrin repeat-containing protein, partial [Cynara cardunculus var. scolymus]	--	--	At5g51160	KOG0504	FOG: Ankyrin repeat	--	--	-	-	-
Unigene001939	398	--	--	--	--	--	--	--	--	--	--	--	-	-	-
Unigene001940	402	AT3G24255.5	RNA-directed DNA polymerase (reverse transcriptase)-related family protein|Chr3:8789309-8790907 FORWARD LENGTH=532	KYP57260.1	Transposon TX1 uncharacterized [Cajanus cajan]	--	--	At2g17910	KOG1075	FOG: Reverse transcriptase	--	--	-	-	-
Unigene001941	408	AT5G53820.1	Late embryogenesis abundant protein (LEA) family protein|Chr5:21853475-21853866 FORWARD LENGTH=67	XP_013451190.1	pollen coat-like protein [Medicago truncatula]// KEH25230.1 pollen coat-like protein [Medicago truncatula]	--	--	--	--	--	--	--	-	-	-
Unigene001942	1307	--	--	--	--	--	--	--	--	--	--	--	-	-	-
Unigene001943	272	AT4G21310.1	transmembrane protein%2C putative (DUF1218)|Chr4:11339134-11339787 REVERSE LENGTH=168	JAT43428.1	Tryptophan synthase beta chain [Anthurium amnicola]	--	--	--	--	--	--	--	-	-	GO:0044425//membrane part;GO:0016020//membrane;GO:0031224//intrinsic component of membrane
Unigene001944	312	--	--	--	--	--	--	--	--	--	--	--	-	-	-
Unigene001945	635	--	--	--	--	--	--	--	--	--	--	--	-	-	-
Unigene001946	458	--	--	--	--	--	--	--	--	--	--	--	-	-	-
Unigene001947	602	--	--	--	--	--	--	--	--	--	--	--	-	-	-
Unigene001948	628	--	--	--	--	--	--	--	--	--	--	--	-	-	-
Unigene001949	713	AT1G21280.1	Copia-like polyprotein/retrotransposon|Chr1:7447690-7448403 REVERSE LENGTH=237	KYP49735.1	Retrovirus-related Pol polyprotein from transposon TNT 1-94 [Cajanus cajan]	--	--	At4g17450	KOG0017	FOG: Transposon-encoded proteins with TYA, reverse transcriptase, integrase domains in various combinations	--	--	-	-	-
Unigene001950	256	AT4G16730.2	terpene synthase 02|Chr4:9403543-9406003 FORWARD LENGTH=493	KVH96608.1	Terpene synthase, metal-binding domain-containing protein [Cynara cardunculus var. scolymus]	sp|B9RHP7|TPS11_RICCO	Probable terpene synthase 11 OS=Ricinus communis GN=TPS11 PE=3 SV=1	--	--	--	K15086//(3S)-linalool synthase [EC:4.2.3.25]	cam:101489988	-	-	-
Unigene001951	269	--	--	--	--	--	--	--	--	--	--	--	-	-	-
Unigene001952	243	AT5G01130.1	hypothetical protein (DUF674)|Chr5:47642-49174 FORWARD LENGTH=452	XP_013448994.1	DUF674 family protein [Medicago truncatula]// KEH23021.1 DUF674 family protein [Medicago truncatula]	--	--	--	--	--	--	--	-	-	-
Unigene001953	720	--	--	--	--	--	--	--	--	--	--	--	-	-	-
Unigene001954	282	--	--	--	--	--	--	--	--	--	--	--	-	-	-
Unigene001955	623	--	--	--	--	--	--	--	--	--	--	--	-	-	-
Unigene001956	315	--	--	OMP05523.1	Integrase, catalytic core [Corchorus capsularis]	sp|P10978|POLX_TOBAC	Retrovirus-related Pol polyprotein from transposon TNT 1-94 OS=Nicotiana tabacum PE=2 SV=1	At3g31023	KOG0017	FOG: Transposon-encoded proteins with TYA, reverse transcriptase, integrase domains in various combinations	--	--	GO:0044237//cellular metabolic process;GO:0009987//cellular process;GO:0008152//metabolic process	-	-
Unigene001957	428	--	--	--	--	--	--	--	--	--	--	--	-	-	-
Unigene001958	219	--	--	EMS51514.1	Protein LE25 [Triticum urartu]	sp|Q00747|LE25_SOLLC	Protein LE25 OS=Solanum lycopersicum GN=LE25 PE=2 SV=1	--	--	--	--	--	-	-	-
Unigene001959	487	--	--	--	--	--	--	--	--	--	--	--	-	-	-
Unigene001960	358	--	--	--	--	--	--	--	--	--	--	--	-	-	-
Unigene001961	491	--	--	--	--	--	--	--	--	--	--	--	-	-	-
Unigene001962	273	AT1G54560.1	Myosin family protein with Dil domain-containing protein|Chr1:20371649-20379745 REVERSE LENGTH=1529	XP_011648738.1	PREDICTED: myosin-11 isoform X2 [Cucumis sativus]	sp|F4HXP9|MYO9_ARATH	Myosin-9 OS=Arabidopsis thaliana GN=XI-C PE=2 SV=1	At1g08730	KOG0160	Myosin class V heavy chain	K10357//myosin V	csv:101206606	-	GO:0017111//nucleoside-triphosphatase activity;GO:0005515//protein binding;GO:0036094//small molecule binding;GO:0008092//cytoskeletal protein binding;GO:0016818//hydrolase activity, acting on acid anhydrides, in phosphorus-containing anhydrides;GO:0001883//purine nucleoside binding;GO:1901363//heterocyclic compound binding;GO:0097159//organic cyclic compound binding;GO:0003824//catalytic activit…	GO:0005623//cell;GO:0044464//cell part;GO:0005622//intracellular;GO:0043232//intracellular non-membrane-bounded organelle;GO:0043228//non-membrane-bounded organelle;GO:0043226//organelle;GO:0043229//intracellular organelle;GO:0005856//cytoskeleton;GO:0044424//intracellular part;GO:0015629//actin cytoskeleton
Unigene001963	859	--	--	--	--	--	--	--	--	--	--	--	-	-	-
Unigene001964	566	--	--	--	--	--	--	--	--	--	--	--	-	-	-
Unigene001965	484	AT2G30690.2	lateral signaling target-like protein (Protein of unknown function%2C DUF593)|Chr2:13076229-13078595 FORWARD LENGTH=760	XP_010651951.1	PREDICTED: myosin-binding protein 1 isoform X1 [Vitis vinifera]// XP_019076431.1 PREDICTED: myosin-binding protein 1 isoform X1 [Vitis vinifera]	sp|F4INW9|MYOB4_ARATH	Probable myosin-binding protein 4 OS=Arabidopsis thaliana GN=MYOB4 PE=3 SV=1	--	--	--	--	--	-	-	-
Unigene001966	713	--	--	--	--	--	--	--	--	--	--	--	-	-	-
Unigene001967	273	--	--	--	--	--	--	--	--	--	--	--	-	-	-
Unigene001968	244	--	--	--	--	--	--	--	--	--	--	--	-	-	-
Unigene001969	216	--	--	--	--	--	--	--	--	--	--	--	-	-	-
Unigene001970	550	--	--	--	--	--	--	--	--	--	--	--	-	-	-
Unigene001971	258	--	--	--	--	--	--	--	--	--	--	--	-	-	-
Unigene001972	340	--	--	--	--	--	--	--	--	--	--	--	-	-	-
Unigene001973	208	--	--	--	--	--	--	--	--	--	--	--	-	-	-
Unigene001974	462	--	--	XP_014618224.1	PREDICTED: protein transport protein SEC31-like [Glycine max]	--	--	At4g04120	KOG0017	FOG: Transposon-encoded proteins with TYA, reverse transcriptase, integrase domains in various combinations	--	--	-	-	-
Unigene001975	203	--	--	KYP64115.1	Retrovirus-related Pol polyprotein from transposon TNT 1-94, partial [Cajanus cajan]	--	--	At1g31210	KOG0017	FOG: Transposon-encoded proteins with TYA, reverse transcriptase, integrase domains in various combinations	--	--	-	-	-
Unigene001976	213	--	--	KVH98615.1	Ankyrin repeat-containing protein, partial [Cynara cardunculus var. scolymus]	--	--	--	--	--	--	--	-	-	-
Unigene001977	334	--	--	--	--	--	--	--	--	--	--	--	-	-	-
Unigene001978	346	AT2G01460.1	P-loop containing nucleoside triphosphate hydrolases superfamily protein|Chr2:206136-211765 FORWARD LENGTH=955	--	--	--	--	--	--	--	--	--	-	-	-
Unigene001979	713	--	--	--	--	--	--	--	--	--	--	--	-	-	-
Unigene001980	273	AT3G26290.2	cytochrome P450%2C family 71%2C subfamily B%2C polypeptide 26|Chr3:9632770-9634478 REVERSE LENGTH=513	XP_016652340.1	PREDICTED: cytochrome P450 71D11-like [Prunus mume]	sp|Q9XHE7|C71DD_MENPI	Cytochrome P450 71D13 OS=Mentha piperita GN=CYP71D13 PE=1 SV=1	At3g26290	KOG0156	Cytochrome P450 CYP2 subfamily	--	--	-	GO:0043167//ion binding;GO:0005488//binding;GO:0016491//oxidoreductase activity;GO:0043169//cation binding;GO:0003824//catalytic activity;GO:0046872//metal ion binding	GO:0016020//membrane
Unigene001981	832	AT3G26210.1	cytochrome P450%2C family 71%2C subfamily B%2C polypeptide 23|Chr3:9593329-9595202 REVERSE LENGTH=501	KVH99202.1	cytochrome P450 [Cynara cardunculus var. scolymus]	sp|O48923|C71DA_SOYBN	Cytochrome P450 71D10 OS=Glycine max GN=CYP71D10 PE=2 SV=1	At3g26210	KOG0156	Cytochrome P450 CYP2 subfamily	--	--	GO:0044699//single-organism process;GO:0044710//single-organism metabolic process;GO:0008152//metabolic process	GO:0097159//organic cyclic compound binding;GO:0005488//binding;GO:0046906//tetrapyrrole binding;GO:0003824//catalytic activity;GO:0016491//oxidoreductase activity;GO:0046914//transition metal ion binding;GO:0043167//ion binding;GO:1901363//heterocyclic compound binding;GO:0043169//cation binding;GO:0046872//metal ion binding	-
Unigene001982	253	--	--	--	--	--	--	--	--	--	--	--	-	-	-
Unigene001983	458	--	--	--	--	--	--	--	--	--	--	--	-	-	-
Unigene001984	238	AT1G26910.1	Ribosomal protein L16p/L10e family protein|Chr1:9321709-9322813 FORWARD LENGTH=221	XP_015693089.1	PREDICTED: 60S ribosomal protein L10-2 [Oryza brachyantha]	sp|Q0DKF0|RL102_ORYSJ	60S ribosomal protein L10-2 OS=Oryza sativa subsp. japonica GN=SG12 PE=2 SV=1	At1g26910	KOG0857	60s ribosomal protein L10	K02866//large subunit ribosomal protein L10e	osa:4337928	-	-	-
Unigene001985	381	--	--	--	--	--	--	--	--	--	--	--	-	-	-
Unigene001986	458	--	--	--	--	--	--	--	--	--	--	--	-	-	-
Unigene001987	386	--	--	--	--	--	--	--	--	--	--	--	-	-	-
Unigene001988	359	--	--	--	--	--	--	--	--	--	--	--	-	-	-
Unigene001989	319	--	--	--	--	--	--	--	--	--	--	--	-	-	-
Unigene001990	535	--	--	--	--	--	--	--	--	--	--	--	-	-	-
Unigene001991	227	--	--	--	--	--	--	--	--	--	--	--	-	-	-
Unigene001992	436	AT3G05590.1	ribosomal protein L18|Chr3:1621511-1622775 FORWARD LENGTH=187	XP_001941769.1	60S ribosomal protein L18 [Pyrenophora tritici-repentis Pt-1C-BFP]// EDU44488.1 60S ribosomal protein L18 [Pyrenophora tritici-repentis Pt-1C-BFP]	sp|Q8TFH1|RL18B_SCHPO	60S ribosomal protein L18-B OS=Schizosaccharomyces pombe (strain 972 / ATCC 24843) GN=rpl1802 PE=1 SV=1	SPBC11C11.07	KOG1714	60s ribosomal protein L18	K02883//large subunit ribosomal protein L18e	csv:105436293	GO:0008152//metabolic process;GO:0010467//gene expression;GO:0043170//macromolecule metabolic process;GO:0071704//organic substance metabolic process	-	GO:0044464//cell part;GO:0005622//intracellular;GO:0032991//macromolecular complex;GO:0030529//intracellular ribonucleoprotein complex;GO:0005623//cell;GO:0044424//intracellular part;GO:1990904//ribonucleoprotein complex
Unigene001993	450	--	--	--	--	--	--	--	--	--	--	--	-	-	-
Unigene001994	310	AT1G45145.1	thioredoxin H-type 5|Chr1:17075264-17076256 REVERSE LENGTH=118	JAT42019.1	Thioredoxin-2 [Anthurium amnicola]	sp|Q6XHI1|THIO2_DROYA	Thioredoxin-2 OS=Drosophila yakuba GN=Trx-2 PE=3 SV=1	7297539	KOG0907	Thioredoxin	K03671//thioredoxin 1	csl:COCSUDRAFT_46495	GO:0008152//metabolic process;GO:0040007//growth;GO:0030447//filamentous growth;GO:0044710//single-organism metabolic process;GO:0065007//biological regulation;GO:0044699//single-organism process;GO:0009987//cellular process	-	GO:0005623//cell;GO:0044424//intracellular part;GO:0005622//intracellular;GO:0044464//cell part
Unigene001995	285	--	--	--	--	--	--	--	--	--	--	--	-	-	-
Unigene001996	1159	--	--	--	--	--	--	--	--	--	--	--	-	-	-
Unigene001997	522	--	--	--	--	--	--	--	--	--	--	--	-	-	-
Unigene001998	503	--	--	--	--	--	--	--	--	--	--	--	-	-	-
[truncated: 58,424 more rows]
