# Supplementary material for: Integrated metabolome and transcriptome revealed the flavonoid biosynthetic pathway in developing Vernonia amygdalina leaves
Source: PeerJ. 2021 Apr 26;9:e11239. doi: 10.7717/peerj.11239 (PMC8083182; doi:10.7717/peerj.11239)
Supplement: Supplemental Information 8 [file peerj-09-11239-s008.xlsx]

## Sheet: DEGs
Supplementary Table S5 The differential expressions of genes generated from Vernonia amygdalina leaves.
	10:20 DAG			10:30 DAG				20:30 DAG
gene	log2FoldChange	pvalue	padj	gene	log2FoldChange	pvalue	padj	gene	log2FoldChange	pvalue	padj
Unigene018706	-5.82674	6.75165e-69	1.1602e-64	Unigene021270	-6.10517	3.63614e-138	7.7017e-134	Unigene020136	3.01256	6.80691e-36	6.70548e-32
Unigene017687	-5.07408	4.58639e-62	3.94063e-58	Unigene035383	4.34148	5.1975e-92	5.50441e-88	Unigene024318	-3.20351	1.01168e-32	4.98305e-29
Unigene020371	-4.42932	1.7117e-60	9.80461e-57	Unigene028911	3.57325	5.1877e-82	3.66269e-78	Unigene021949	-3.24827	1.41572e-31	4.64877e-28
Unigene021270	-4.62792	5.78518e-59	2.48531e-55	Unigene018706	-9.73958	1.35688e-74	7.18499e-71	Unigene024661	-3.53792	1.77755e-29	4.37766e-26
Unigene023180	-5.83684	2.68008e-58	9.21089e-55	Unigene036291	4.25979	2.75613e-71	1.16755e-67	Unigene028911	2.90407	1.06203e-27	2.09242e-24
Unigene027881	-5.15658	1.98111e-38	5.67389e-35	Unigene023180	-4.79182	6.14274e-70	2.16849e-66	Unigene024596	2.37561	3.1986e-24	5.25156e-21
Unigene035383	3.56361	6.91097e-37	1.69654e-33	Unigene041873	-3.02646	1.71785e-66	5.19796e-63	Unigene027576	2.62112	1.05063e-23	1.47854e-20
Unigene020793	3.85703	9.61266e-36	2.0648e-32	Unigene020371	-3.63803	9.14347e-63	2.42085e-59	Unigene017692	2.5292	3.41419e-21	4.17083e-18
Unigene020442	-4.44791	5.37257e-35	1.0258e-31	Unigene033726	2.93883	1.8475e-60	4.34799e-57	Unigene021654	2.34159	3.81052e-21	4.17083e-18
Unigene020969	-4.33143	4.18768e-34	7.19612e-31	Unigene017687	-7.37754	5.33431e-59	1.12986e-55	Unigene022262	2.43947	5.59975e-21	4.59693e-18
Unigene041873	-2.85342	7.688e-34	1.20101e-30	Unigene028586	3.27172	3.68823e-58	7.10185e-55	Unigene027552	-2.93767	5.41825e-21	4.59693e-18
Unigene025966	-6.17773	5.37096e-33	7.69121e-30	Unigene021273	4.56393	3.05404e-56	5.39064e-53	Unigene034018	-2.44773	5.42546e-21	4.59693e-18
Unigene046425	2.98091	1.02711e-32	1.35768e-29	Unigene030153	2.81132	1.24236e-54	2.02419e-51	Unigene025153	-2.70354	1.92579e-20	1.4593e-17
Unigene021273	3.87483	9.16138e-32	1.12449e-28	Unigene020793	4.38304	2.77062e-52	4.19175e-49	Unigene043998	2.72057	2.97028e-20	2.09001e-17
Unigene029667	-3.48941	2.19309e-30	2.5124e-27	Unigene029667	-4.88566	1.52003e-51	2.14639e-48	Unigene028501	3.39614	2.23043e-18	1.4648e-15
Unigene020921	-3.7179	2.27274e-29	2.44093e-26	Unigene039092	-4.82081	1.3858e-48	1.83454e-45	Unigene021215	3.10149	2.87468e-18	1.7699e-15
Unigene028586	2.96568	4.75769e-29	4.80919e-26	Unigene030790	3.96804	3.76359e-48	4.68922e-45	Unigene021354	2.53079	4.00204e-18	2.31906e-15
Unigene033451	-4.09652	5.67546e-28	5.41817e-25	Unigene020858	3.62391	1.22746e-47	1.44438e-44	Unigene024087	2.54392	2.76977e-17	1.51583e-14
Unigene033379	-7.04883	1.16273e-27	1.0516e-24	Unigene018752	3.01652	6.29582e-47	7.01852e-44	Unigene024784	-2.38784	3.13555e-17	1.6257e-14
Unigene029885	-5.23647	1.26532e-26	1.08717e-23	Unigene026049	4.4732	5.82027e-46	6.16395e-43	Unigene046425	-2.04767	5.1475e-17	2.5354e-14
Unigene021735	-3.92213	2.60425e-26	2.13102e-23	Unigene023750	4.37147	3.85795e-45	3.89121e-42	Unigene038844	-3.41827	7.42726e-17	3.48409e-14
Unigene020363	-10.8339	7.5104e-26	5.86631e-23	Unigene026850	5.25924	5.25051e-44	5.05505e-41	Unigene039459	-3.45539	1.41254e-16	6.32499e-14
Unigene050084	-2.79468	2.85677e-25	2.13438e-22	Unigene025282	2.35623	7.2574e-44	6.68344e-41	Unigene032518	-2.31988	5.78827e-16	2.47914e-13
Unigene013099	3.38826	7.26796e-25	5.20386e-22	Unigene022824	3.3245	1.53858e-43	1.35786e-40	Unigene021382	2.99427	6.22841e-16	2.5565e-13
Unigene026850	4.40654	1.36828e-24	9.40501e-22	Unigene024277	-3.90807	3.34898e-42	2.83739e-39	Unigene019793	1.95955	2.36922e-15	9.08921e-13
Unigene030153	2.50142	1.9047e-24	1.25886e-21	Unigene020442	-5.71822	5.98162e-42	4.87295e-39	Unigene026507	-2.79082	2.39894e-15	9.08921e-13
Unigene032524	-3.29156	2.23814e-23	1.42445e-20	Unigene025622	2.70104	1.16453e-41	9.13548e-39	Unigene023750	2.14803	3.38925e-15	1.23657e-12
Unigene022551	-3.33148	2.92678e-23	1.79621e-20	Unigene022766	3.06874	1.64049e-41	1.24098e-38	Unigene018374	2.06596	9.86371e-15	3.47026e-12
Unigene028226	4.70043	5.27156e-23	3.12367e-20	Unigene031858	2.17443	4.0979e-41	2.99302e-38	Unigene030790	2.24975	1.26655e-14	4.30233e-12
Unigene012489	3.77552	1.1654e-22	6.67541e-20	Unigene022822	-4.41696	2.9575e-38	2.08809e-35	Unigene025622	2.25906	1.48256e-14	4.86824e-12
Unigene022592	3.4162	5.43311e-22	3.01169e-19	Unigene035702	-6.21673	3.32755e-37	2.27357e-34	Unigene025282	1.74261	1.5512e-14	4.92932e-12
Unigene039712	-4.2415	7.70931e-22	4.1399e-19	Unigene021047	2.43627	1.05183e-35	6.96216e-33	Unigene042155	-2.73808	2.99604e-14	9.22313e-12
Unigene031280	3.15066	8.90183e-22	4.63543e-19	Unigene028226	5.30302	1.69994e-35	1.0911e-32	Unigene023224	2.36763	3.58627e-14	1.03907e-11
Unigene045480	-5.16061	2.41452e-21	1.22033e-18	Unigene020136	2.44314	2.52459e-35	1.57274e-32	Unigene030547	3.14211	3.57018e-14	1.03907e-11
Unigene012307	3.56673	5.45793e-21	2.67969e-18	Unigene032524	-4.80286	5.08695e-35	3.07848e-32	Unigene029997	-3.50463	3.85759e-14	1.05559e-11
Unigene026540	-4.38172	5.63304e-21	2.68884e-18	Unigene029997	-3.96742	6.61072e-35	3.88949e-32	Unigene037253	-2.03577	3.78936e-14	1.05559e-11
Unigene020264	-8.09406	6.96426e-21	3.23443e-18	Unigene044571	-4.49079	9.48292e-35	5.42859e-32	Unigene022218	-4.09604	4.28416e-14	1.14063e-11
Unigene035704	-4.75348	7.89372e-21	3.56962e-18	Unigene037141	2.91982	2.17537e-34	1.21254e-31	Unigene037141	1.82363	6.26322e-14	1.62366e-11
Unigene049972	8.02227	1.31884e-20	5.81102e-18	Unigene043157	-3.95049	5.23874e-34	2.84517e-31	Unigene032825	-2.7441	7.47071e-14	1.88702e-11
Unigene034672	-6.56551	1.91717e-20	8.23616e-18	Unigene019364	1.95861	1.21593e-33	6.28159e-31	Unigene032127	-2.66692	1.27002e-13	3.05145e-11
Unigene030573	-5.41886	7.01435e-20	2.93987e-17	Unigene033451	-5.24923	1.20703e-33	6.28159e-31	Unigene033699	1.89708	1.26197e-13	3.05145e-11
Unigene024283	-3.35166	9.20409e-20	3.76579e-17	Unigene025966	-6.39656	1.55773e-33	7.85578e-31	Unigene024990	-3.42392	1.42169e-13	3.33455e-11
Unigene017132	-7.84638	9.47378e-20	3.78599e-17	Unigene020859	2.93514	2.17798e-33	1.07283e-30	Unigene044465	-3.32187	1.65206e-13	3.78475e-11
Unigene024088	2.35378	1.04322e-19	4.07426e-17	Unigene023636	2.28621	3.3597e-33	1.61731e-30	Unigene032177	-3.631	2.66597e-13	5.96875e-11
Unigene019930	-3.74768	1.2217e-19	4.66527e-17	Unigene033074	2.5743	4.07865e-33	1.91978e-30	Unigene019855	1.73923	5.30997e-13	1.16241e-10
Unigene029260	-2.68827	1.69485e-19	6.33138e-17	Unigene020969	-6.68009	5.56124e-33	2.56071e-30	Unigene047003	-4.08238	5.58853e-13	1.1968e-10
Unigene018378	-2.9662	2.21906e-19	8.11327e-17	Unigene024087	3.36026	8.18154e-33	3.68709e-30	Unigene016942	1.84383	6.15675e-13	1.29043e-10
Unigene022949	2.4966	3.10554e-19	1.11178e-16	Unigene024318	-2.751	2.17464e-32	9.59603e-30	Unigene019669	1.76319	6.70943e-13	1.37697e-10
Unigene034018	2.38868	3.23167e-19	1.13333e-16	Unigene026237	1.81977	7.07983e-32	3.06036e-29	Unigene033074	1.70091	7.32556e-13	1.47274e-10
Unigene030875	-4.2847	3.41394e-19	1.1733e-16	Unigene021735	-4.89298	8.92804e-32	3.7821e-29	Unigene027496	-5.64431	8.12697e-13	1.60118e-10
Unigene018546	4.94987	4.53973e-19	1.52962e-16	Unigene022096	2.70895	1.12338e-31	4.66557e-29	Unigene024846	2.00684	8.9406e-13	1.72694e-10
Unigene020858	2.52637	8.11452e-19	2.68154e-16	Unigene022551	-3.84214	3.67664e-31	1.49759e-28	Unigene016439	2.06241	1.82641e-12	3.39471e-10
Unigene032512	-3.66659	2.42284e-18	7.85549e-16	Unigene020985	1.89482	6.83778e-31	2.73266e-28	Unigene043157	-3.14334	1.79648e-12	3.39471e-10
Unigene034745	-4.6139	2.53343e-18	8.06194e-16	Unigene019669	2.70636	1.64197e-29	6.44046e-27	Unigene036252	2.51574	2.4983e-12	4.55755e-10
Unigene036896	-5.57022	3.26921e-18	1.02142e-15	Unigene022445	1.96533	3.13144e-29	1.20595e-26	Unigene046543	-2.40287	4.09439e-12	7.33343e-10
Unigene022005	-6.72705	3.52093e-18	1.08042e-15	Unigene038844	-4.14308	5.63369e-29	2.13084e-26	Unigene029215	-4.90954	4.25155e-12	7.47893e-10
Unigene016915	-2.24524	4.51514e-18	1.3612e-15	Unigene018546	6.09818	6.58922e-29	2.44853e-26	Unigene040048	1.55115	4.50491e-12	7.7856e-10
Unigene016425	2.41855	6.49006e-18	1.92285e-15	Unigene035703	-4.49705	1.03348e-28	3.77416e-26	Unigene023883	-5.38824	4.98928e-12	8.47404e-10
Unigene027964	-8.85768	9.14572e-18	2.66373e-15	Unigene031152	3.94517	1.94122e-28	6.969e-26	Unigene036291	1.61859	7.14329e-12	1.19269e-09
Unigene029843	-3.95287	1.10796e-17	3.1732e-15	Unigene019793	3.4025	5.35617e-28	1.89082e-25	Unigene019963	2.19181	8.3931e-12	1.37801e-09
Unigene029077	-4.78002	1.14311e-17	3.2202e-15	Unigene012489	3.86675	1.24444e-27	4.32105e-25	Unigene030908	2.08552	8.94544e-12	1.44462e-09
Unigene041874	-1.9169	2.03301e-17	5.63471e-15	Unigene027881	-7.34268	1.42548e-27	4.86985e-25	Unigene020196	-2.68743	9.18325e-12	1.4591e-09
Unigene028377	-3.73669	2.0717e-17	5.65082e-15	Unigene014536	4.11066	1.7537e-27	5.89605e-25	Unigene028163	2.13045	1.04041e-11	1.62684e-09
Unigene035702	-3.06779	2.74876e-17	7.38041e-15	Unigene035358	2.84081	2.60704e-27	8.62807e-25	Unigene036063	-2.50865	1.65567e-11	2.54844e-09
Unigene022096	2.12778	8.43095e-17	2.22888e-14	Unigene021654	2.16558	5.04234e-27	1.6431e-24	Unigene012307	-2.07418	1.8877e-11	2.86088e-09
Unigene027887	-3.25047	1.01913e-16	2.65344e-14	Unigene020841	2.04068	7.70775e-27	2.4736e-24	Unigene058156	2.8077	1.9629e-11	2.92978e-09
Unigene031119	-2.15116	1.45098e-16	3.72145e-14	Unigene026541	-3.44103	8.20712e-27	2.59455e-24	Unigene038596	-2.02938	2.0623e-11	3.0322e-09
Unigene018420	2.49021	1.68547e-16	4.25928e-14	Unigene011498	2.47158	2.3986e-26	7.47128e-24	Unigene039864	-2.24929	2.52066e-11	3.65162e-09
Unigene027284	2.15274	1.87336e-16	4.59884e-14	Unigene024283	-3.98355	4.27694e-26	1.29477e-23	Unigene032620	1.87502	2.7596e-11	3.93983e-09
Unigene046424	2.44408	1.86345e-16	4.59884e-14	Unigene031119	-2.20783	4.27902e-26	1.29477e-23	Unigene009980	1.74627	2.83225e-11	3.98579e-09
Unigene028500	2.84916	3.1552e-16	7.63646e-14	Unigene026289	2.0795	1.6374e-25	4.88476e-23	Unigene045412	1.68565	2.93744e-11	4.0756e-09
Unigene013098	2.97127	4.12124e-16	9.83601e-14	Unigene029885	-5.95648	1.7254e-25	5.07578e-23	Unigene021951	1.64054	3.42278e-11	4.68302e-09
Unigene037566	-3.89068	6.30617e-16	1.48445e-13	Unigene016942	2.41097	2.21893e-25	6.43824e-23	Unigene032459	-2.38788	3.70133e-11	4.99477e-09
Unigene029668	-3.46052	6.44059e-16	1.49561e-13	Unigene022244	3.2585	2.3349e-25	6.68318e-23	Unigene017983	2.16961	4.54512e-11	6.05054e-09
Unigene020207	3.2249	7.33763e-16	1.6812e-13	Unigene032213	1.86055	4.08637e-25	1.15405e-22	Unigene030067	-3.87558	4.87581e-11	6.40422e-09
Unigene029503	-4.11789	7.61069e-16	1.72082e-13	Unigene045002	-3.58173	4.87298e-25	1.35809e-22	Unigene019451	-1.68153	5.19645e-11	6.73555e-09
Unigene024952	-2.92558	8.71325e-16	1.94452e-13	Unigene019204	1.77968	1.12291e-24	3.08889e-22	Unigene017469	-4.52955	6.0376e-11	7.72421e-09
Unigene020992	-3.98836	8.94482e-16	1.97061e-13	Unigene033380	-5.06002	6.25786e-24	1.69933e-21	Unigene035703	-3.28158	6.134e-11	7.74693e-09
Unigene025364	-2.99714	1.386e-15	3.01481e-13	Unigene020921	-7.5307	6.37251e-24	1.70856e-21	Unigene026795	-3.57713	8.99811e-11	1.12203e-08
Unigene033709	2.35909	3.65579e-15	7.85264e-13	Unigene024745	-4.18645	6.55075e-24	1.73439e-21	Unigene030697	-3.17123	9.33581e-11	1.14959e-08
Unigene026705	-5.71615	3.99761e-15	8.48086e-13	Unigene042284	1.50081	1.04994e-23	2.74554e-21	Unigene022605	-3.23408	1.02621e-10	1.24804e-08
Unigene042348	-5.35297	4.89358e-15	1.0255e-12	Unigene035325	-2.68388	1.3159e-23	3.39904e-21	Unigene032876	-2.32562	1.06077e-10	1.25984e-08
Unigene038713	-4.14975	5.58095e-15	1.15546e-12	Unigene028743	2.2838	1.40415e-23	3.58329e-21	Unigene033037	1.33621	1.06148e-10	1.25984e-08
Unigene020859	2.18989	5.80727e-15	1.188e-12	Unigene021473	1.71718	2.54702e-23	6.42243e-21	Unigene022822	-3.16346	1.21999e-10	1.43073e-08
Unigene049476	-2.41308	6.00283e-15	1.21356e-12	Unigene034519	1.97319	2.78189e-23	6.93214e-21	Unigene027340	-4.43334	1.30509e-10	1.51252e-08
Unigene014319	-5.63544	9.57242e-15	1.9127e-12	Unigene022798	3.53178	5.02509e-23	1.23763e-20	Unigene055009	2.50254	1.40289e-10	1.60696e-08
Unigene016823	-3.40137	1.01138e-14	1.99765e-12	Unigene021215	2.75202	6.32954e-23	1.54099e-20	Unigene017487	-1.56308	1.6081e-10	1.82085e-08
Unigene028869	2.95092	1.89564e-14	3.70166e-12	Unigene016096	2.89596	7.29764e-23	1.75649e-20	Unigene026810	-3.12997	1.70033e-10	1.9034e-08
Unigene027370	-2.57969	2.08964e-14	4.03464e-12	Unigene026213	1.49053	1.45134e-22	3.45402e-20	Unigene034846	-2.1335	2.21795e-10	2.45494e-08
Unigene034846	2.66247	2.48077e-14	4.73661e-12	Unigene038737	1.81049	1.64032e-22	3.86041e-20	Unigene032227	2.91712	2.67241e-10	2.92511e-08
Unigene017487	1.71585	2.85602e-14	5.39317e-12	Unigene032860	-1.77622	1.95654e-22	4.55401e-20	Unigene024058	1.71489	2.87074e-10	3.10765e-08
Unigene011761	-3.09977	3.34005e-14	6.23863e-12	Unigene023840	-2.08784	2.62761e-22	6.0495e-20	Unigene026213	1.24545	3.29606e-10	3.52929e-08
Unigene017539	2.36159	3.79545e-14	7.01302e-12	Unigene049972	10.1256	3.64631e-22	8.30458e-20	Unigene022439	2.26133	4.91016e-10	5.20108e-08
Unigene029941	-3.36137	4.10612e-14	7.50633e-12	Unigene024846	8.22372	4.06096e-22	9.15056e-20	Unigene048586	-3.99178	5.22315e-10	5.47375e-08
Unigene026777	-5.52097	4.45855e-14	8.06482e-12	Unigene027239	1.5612	4.59333e-22	1.02412e-19	Unigene022592	-1.49099	6.7972e-10	7.04834e-08
Unigene036291	2.50551	4.75237e-14	8.50675e-12	Unigene033709	2.22694	6.34498e-22	1.39993e-19	Unigene028237	2.41392	7.77169e-10	7.97489e-08
Unigene022217	-4.11039	5.38561e-14	9.54086e-12	Unigene035738	1.68105	7.76793e-22	1.69621e-19	Unigene032464	-3.78702	8.20989e-10	8.33769e-08
Unigene033645	2.63008	5.67814e-14	9.95645e-12	Unigene016439	2.66624	8.62186e-22	1.85359e-19	Unigene034733	-1.93857	1.07423e-09	1.07982e-07
Unigene037763	2.63241	6.07628e-14	1.0547e-11	Unigene019930	-5.59935	8.66366e-22	1.85359e-19	Unigene027570	1.76779	1.09357e-09	1.08126e-07
Unigene019135	-1.86421	6.4389e-14	1.10646e-11	Unigene033037	2.02182	1.22386e-21	2.59225e-19	Unigene038361	-2.10046	1.09762e-09	1.08126e-07
Unigene030026	-6.57907	7.64696e-14	1.30104e-11	Unigene039712	-5.78733	1.49638e-21	3.1381e-19	Unigene022495	-3.85546	1.16374e-09	1.13505e-07
Unigene025508	2.37218	7.72348e-14	1.30118e-11	Unigene016643	-3.21505	1.76533e-21	3.66583e-19	Unigene046424	-1.72347	1.34081e-09	1.29494e-07
Unigene041931	-2.13525	7.91627e-14	1.32071e-11	Unigene042637	2.00902	1.86699e-21	3.83929e-19	Unigene037763	-1.99009	1.44748e-09	1.38438e-07
Unigene025346	-5.15415	9.82875e-14	1.62401e-11	Unigene011564	2.78921	2.56885e-21	5.2318e-19	Unigene034092	1.44279	1.5373e-09	1.45615e-07
Unigene038257	-5.45259	1.01109e-13	1.65473e-11	Unigene019263	2.92541	2.74779e-21	5.54295e-19	Unigene037034	-2.23187	1.82013e-09	1.70762e-07
Unigene021123	-3.94908	1.32494e-13	2.1479e-11	Unigene027887	-3.65724	4.51989e-21	9.03168e-19	Unigene018752	1.42446	2.28586e-09	2.12434e-07
Unigene047336	2.40344	1.53886e-13	2.47139e-11	Unigene027370	-3.20853	6.58658e-21	1.30384e-18	Unigene021223	1.60515	2.3749e-09	2.18646e-07
Unigene024745	-2.60212	1.57634e-13	2.50813e-11	Unigene018420	2.66398	7.28553e-21	1.42884e-18	Unigene044363	1.44032	2.52778e-09	2.30566e-07
Unigene028825	-10.3671	1.6388e-13	2.58359e-11	Unigene020347	2.506	7.54484e-21	1.46612e-18	Unigene042637	1.44193	2.67491e-09	2.41748e-07
Unigene018480	-4.40617	1.95925e-13	3.0607e-11	Unigene018378	-7.92503	8.74159e-21	1.66807e-18	Unigene022012	2.81483	3.02369e-09	2.70785e-07
Unigene023148	-6.47176	2.43453e-13	3.76891e-11	Unigene022896	2.1949	8.69069e-21	1.66807e-18	Unigene017703	-1.85522	3.56823e-09	3.16672e-07
Unigene031858	1.69323	2.78143e-13	4.26751e-11	Unigene036870	1.85248	8.98195e-21	1.69863e-18	Unigene024592	1.80067	3.83337e-09	3.37165e-07
Unigene016643	-2.69417	2.99135e-13	4.50922e-11	Unigene032512	-5.84807	9.44817e-21	1.77099e-18	Unigene016804	1.99024	3.97595e-09	3.46611e-07
Unigene032722	1.94199	2.99145e-13	4.50922e-11	Unigene028237	5.12016	1.27984e-20	2.37792e-18	Unigene028743	1.38454	5.84426e-09	5.05016e-07
Unigene024277	-2.0513	3.18751e-13	4.76298e-11	Unigene025348	3.70816	1.61377e-20	2.97229e-18	Unigene030788	1.28316	6.11873e-09	5.24136e-07
Unigene024956	1.9204	3.60126e-13	5.33484e-11	Unigene041752	-3.46936	2.083e-20	3.80345e-18	Unigene015255	4.27285	6.51275e-09	5.53078e-07
Unigene021756	-4.33149	3.66692e-13	5.38568e-11	Unigene019855	1.94889	2.41142e-20	4.3655e-18	Unigene021360	2.32009	7.37056e-09	6.20576e-07
Unigene018284	-3.77263	4.47342e-13	6.5028e-11	Unigene028377	-4.83803	3.23364e-20	5.80439e-18	Unigene045964	-2.63812	7.48382e-09	6.24772e-07
Unigene041448	-4.43153	4.50322e-13	6.5028e-11	Unigene022616	1.36905	3.55369e-20	6.32527e-18	Unigene011448	1.82085	7.6775e-09	6.35555e-07
Unigene028501	-2.97278	4.5438e-13	6.50672e-11	Unigene026507	-2.67495	4.08258e-20	7.2061e-18	Unigene033726	1.21985	8.48387e-09	6.96455e-07
Unigene024706	2.37553	5.21849e-13	7.41112e-11	Unigene020207	3.30534	4.78356e-20	8.34613e-18	Unigene022798	1.90159	9.1419e-09	7.44272e-07
Unigene022442	-1.99787	5.87727e-13	8.27828e-11	Unigene023749	3.29768	4.84546e-20	8.34613e-18	Unigene028141	3.46606	1.16428e-08	9.40105e-07
Unigene021281	-3.13879	7.77852e-13	1.08672e-10	Unigene040090	1.7133	4.84667e-20	8.34613e-18	Unigene038901	-4.8423	1.25576e-08	1.00573e-06
Unigene046952	-1.96736	7.88148e-13	1.09222e-10	Unigene030152	2.33904	5.19115e-20	8.86724e-18	Unigene032811	-4.01271	1.30439e-08	1.03112e-06
Unigene041449	-3.73749	8.11131e-13	1.11508e-10	Unigene028169	2.33896	7.02852e-20	1.19097e-17	Unigene039407	-1.80705	1.3084e-08	1.03112e-06
Unigene029231	2.3296	8.63057e-13	1.17704e-10	Unigene027339	-5.90656	1.17413e-19	1.97376e-17	Unigene031468	2.11771	1.34216e-08	1.04107e-06
Unigene017315	-10.0311	9.32018e-13	1.26109e-10	Unigene026561	1.78501	1.18388e-19	1.97447e-17	Unigene041781	-2.22241	1.33886e-08	1.04107e-06
Unigene033432	4.04434	1.08137e-12	1.45174e-10	Unigene024088	1.98017	1.3854e-19	2.29252e-17	Unigene025590	1.19046	1.52578e-08	1.17426e-06
Unigene036004	-4.38015	1.09325e-12	1.45631e-10	Unigene016525	-2.65798	1.88523e-19	3.09543e-17	Unigene029094	-2.25804	1.71624e-08	1.3106e-06
Unigene030134	-2.75789	1.42116e-12	1.87855e-10	Unigene030468	2.41177	2.33339e-19	3.8018e-17	Unigene022244	1.84769	2.10075e-08	1.59189e-06
Unigene031337	-1.61308	1.59854e-12	2.0969e-10	Unigene049476	-2.87647	2.66187e-19	4.3039e-17	Unigene025724	1.51269	2.12732e-08	1.59277e-06
Unigene037377	-2.70554	1.63544e-12	2.12905e-10	Unigene030547	3.25352	2.73932e-19	4.39557e-17	Unigene043342	-2.01556	2.13426e-08	1.59277e-06
Unigene039092	-2.39072	1.68926e-12	2.18258e-10	Unigene021486	1.64264	3.06872e-19	4.88711e-17	Unigene020647	-1.49007	2.15399e-08	1.59541e-06
Unigene027729	-3.89728	2.16744e-12	2.77951e-10	Unigene025364	-2.90041	3.14023e-19	4.96367e-17	Unigene040338	-3.44996	2.25033e-08	1.65433e-06
Unigene044571	-2.21463	2.47059e-12	3.14478e-10	Unigene031468	5.14037	5.40553e-19	8.48107e-17	Unigene045949	-5.43	2.57985e-08	1.88252e-06
Unigene054215	3.41484	2.61309e-12	3.30172e-10	Unigene015614	4.06126	7.15252e-19	1.11395e-16	Unigene025449	-5.5179	3.1882e-08	2.30933e-06
Unigene039481	-2.77694	3.01063e-12	3.77626e-10	Unigene019963	2.75374	7.81732e-19	1.2086e-16	Unigene038460	-1.81677	3.70724e-08	2.6657e-06
Unigene048835	-2.94596	3.59109e-12	4.47169e-10	Unigene029843	-5.43787	1.30669e-18	2.00558e-16	Unigene030230	-3.85056	3.74627e-08	2.67424e-06
Unigene028980	-4.31658	3.66409e-12	4.52976e-10	Unigene019192	-1.21	1.56237e-18	2.38076e-16	Unigene046734	-3.04367	4.05337e-08	2.87264e-06
Unigene019364	1.51827	3.75091e-12	4.60397e-10	Unigene040732	-2.0811	1.57765e-18	2.38686e-16	Unigene029322	1.22807	4.5646e-08	3.21185e-06
Unigene053912	-3.15727	4.30932e-12	5.25186e-10	Unigene022449	1.95947	1.88234e-18	2.82765e-16	Unigene025920	-2.3175	4.78649e-08	3.3441e-06
Unigene026049	2.74723	5.91959e-12	7.16354e-10	Unigene032529	1.30611	2.02791e-18	3.02487e-16	Unigene014075	1.43725	4.95749e-08	3.41512e-06
Unigene035402	-7.12604	7.59306e-12	9.12441e-10	Unigene030134	-3.61469	2.12692e-18	3.15037e-16	Unigene014588	-3.02811	4.9296e-08	3.41512e-06
Unigene024092	-5.11171	7.87382e-12	9.39609e-10	Unigene022005	-6.66421	2.37387e-18	3.49173e-16	Unigene025001	-2.11251	5.55277e-08	3.79863e-06
Unigene020891	-3.91525	8.69208e-12	1.0301e-09	Unigene021951	2.36755	2.55372e-18	3.73037e-16	Unigene024365	-3.9004	6.00301e-08	4.05494e-06
Unigene024950	-6.06483	9.471e-12	1.11472e-09	Unigene048835	-5.37983	3.61033e-18	5.2377e-16	Unigene024394	-2.54957	6.00976e-08	4.05494e-06
Unigene026019	1.96152	1.14397e-11	1.33728e-09	Unigene048257	-2.7063	3.7543e-18	5.40951e-16	Unigene031434	1.7422	6.19443e-08	4.15111e-06
Unigene022896	1.62945	1.15987e-11	1.3467e-09	Unigene029668	-5.67267	4.33094e-18	6.19822e-16	Unigene040122	-3.01085	8.04298e-08	5.35347e-06
Unigene033726	1.59902	1.31239e-11	1.51357e-09	Unigene016804	3.02615	5.05676e-18	7.18841e-16	Unigene028869	-1.87488	8.57829e-08	5.67146e-06
Unigene033277	-7.03453	1.43041e-11	1.62996e-09	Unigene017823	-4.1163	5.27853e-18	7.45364e-16	Unigene043410	-1.87808	9.11435e-08	5.98569e-06
Unigene035546	1.8353	1.43229e-11	1.62996e-09	Unigene021583	-3.32969	8.26348e-18	1.15913e-15	Unigene033569	-1.47681	9.30119e-08	6.06795e-06
Unigene045688	3.396	1.5487e-11	1.75084e-09	Unigene024365	-5.24702	9.92018e-18	1.38236e-15	Unigene029340	-2.69865	9.76488e-08	6.32854e-06
Unigene012465	-1.99834	1.6687e-11	1.87418e-09	Unigene024737	2.24678	1.01182e-17	1.40075e-15	Unigene038161	-1.94026	1.11406e-07	7.17293e-06
Unigene014718	2.7346	1.74951e-11	1.95218e-09	Unigene029712	-3.75573	1.022e-17	1.40565e-15	Unigene022643	-1.49675	1.14635e-07	7.33293e-06
Unigene033425	4.24331	1.87046e-11	2.07368e-09	Unigene024952	-2.94068	1.2392e-17	1.69338e-15	Unigene036804	-2.46709	1.32474e-07	8.41935e-06
Unigene038091	-2.83077	2.01084e-11	2.21502e-09	Unigene037566	-4.16475	1.50349e-17	2.04138e-15	Unigene045371	2.007	1.38218e-07	8.7281e-06
Unigene035986	-4.17761	2.06208e-11	2.25699e-09	Unigene029569	1.44801	1.65006e-17	2.22611e-15	Unigene026049	1.52937	1.4146e-07	8.83874e-06
Unigene022000	-3.32412	2.22503e-11	2.41994e-09	Unigene025118	-1.60372	1.98743e-17	2.66428e-15	Unigene046985	1.81987	1.41764e-07	8.83874e-06
Unigene024846	6.02228	2.34349e-11	2.53274e-09	Unigene016874	2.21227	2.25551e-17	3.00465e-15	Unigene024781	1.24625	1.45707e-07	8.97097e-06
Unigene023133	-2.36587	3.37299e-11	3.6226e-09	Unigene021443	1.77274	2.43747e-17	3.22676e-15	Unigene043330	-1.2432	1.45227e-07	8.97097e-06
Unigene025465	-6.90292	3.5421e-11	3.78059e-09	Unigene047336	2.57592	2.57693e-17	3.39018e-15	Unigene028500	-1.46141	1.56847e-07	9.59691e-06
Unigene037253	1.79557	4.12267e-11	4.37308e-09	Unigene021392	-4.13724	2.68715e-17	3.51337e-15	Unigene035175	-1.8196	1.63216e-07	9.92496e-06
Unigene014099	-6.8794	4.18658e-11	4.41363e-09	Unigene016915	-1.78707	3.18229e-17	4.13522e-15	Unigene025315	-1.40805	1.94844e-07	1.17755e-05
Unigene036750	1.66982	4.62281e-11	4.84381e-09	Unigene021354	2.30808	3.59836e-17	4.64737e-15	Unigene013114	-1.64591	2.09699e-07	1.2596e-05
Unigene029285	-3.25232	4.67009e-11	4.86369e-09	Unigene021359	-8.71574	4.86456e-17	6.20701e-15	Unigene038516	-2.47554	2.193e-07	1.30929e-05
Unigene020795	1.74383	5.14987e-11	5.33105e-09	Unigene021360	3.86321	4.83954e-17	6.20701e-15	Unigene036537	-1.87749	2.2634e-07	1.34318e-05
Unigene016509	1.83563	5.36421e-11	5.51968e-09	Unigene039481	-3.47983	5.22305e-17	6.62452e-15	Unigene045838	-2.26011	2.52499e-07	1.48944e-05
Unigene025118	-1.64166	5.50998e-11	5.63592e-09	Unigene029503	-3.9766	5.33067e-17	6.72076e-15	Unigene033430	-1.52039	3.15983e-07	1.85282e-05
Unigene031859	-4.10404	5.73736e-11	5.83378e-09	Unigene034745	-5.87865	5.70593e-17	7.15132e-15	Unigene029765	1.38091	3.27758e-07	1.9105e-05
Unigene018834	-3.31724	5.94281e-11	6.00713e-09	Unigene020516	3.26133	6.53346e-17	8.14031e-15	Unigene039560	-1.95771	3.3734e-07	1.95478e-05
Unigene044465	2.52331	6.12756e-11	6.15766e-09	Unigene034672	-7.1797	6.90425e-17	8.55199e-15	Unigene027531	-2.15108	3.46775e-07	1.99771e-05
Unigene014907	-10.0985	6.17233e-11	6.16659e-09	Unigene027258	2.01464	7.23617e-17	8.91101e-15	Unigene045145	-1.39702	3.74586e-07	2.14538e-05
Unigene018216	-2.99564	6.30158e-11	6.25932e-09	Unigene020363	-11.6248	9.22651e-17	1.12963e-14	Unigene024042	-2.95932	3.94186e-07	2.24458e-05
Unigene030533	-3.51163	6.994e-11	6.90718e-09	Unigene028825	-12.7929	1.01269e-16	1.23275e-14	Unigene043624	-1.44996	4.02631e-07	2.27949e-05
Unigene018273	-2.88197	7.37882e-11	7.24558e-09	Unigene028515	-3.15092	1.47988e-16	1.79116e-14	Unigene047004	-2.10905	4.17219e-07	2.34858e-05
Unigene019017	1.91603	8.68201e-11	8.4768e-09	Unigene046432	-2.38304	1.52284e-16	1.83269e-14	Unigene036507	1.14719	4.32665e-07	2.42169e-05
Unigene024089	2.39363	9.91107e-11	9.62214e-09	Unigene044357	1.88438	1.59741e-16	1.91156e-14	Unigene022765	2.86931	4.51552e-07	2.51313e-05
Unigene039407	2.124	1.04811e-10	1.01184e-08	Unigene032620	2.05173	1.60773e-16	1.91311e-14	Unigene021047	1.1826	4.6056e-07	2.54886e-05
Unigene021266	3.18144	1.14693e-10	1.10051e-08	Unigene019016	2.16135	1.62234e-16	1.91971e-14	Unigene007839	-1.77799	4.71829e-07	2.59664e-05
Unigene035697	-2.44417	1.15277e-10	1.10051e-08	Unigene017692	2.16889	1.8111e-16	2.13116e-14	Unigene031337	1.04306	5.27955e-07	2.88938e-05
Unigene011754	-9.95251	1.21548e-10	1.15396e-08	Unigene031757	1.76143	1.82397e-16	2.13444e-14	Unigene038462	-1.62264	5.3734e-07	2.91467e-05
Unigene009437	1.63755	1.26375e-10	1.1932e-08	Unigene038914	3.5323	2.00925e-16	2.33834e-14	Unigene038552	-1.99743	5.38493e-07	2.91467e-05
Unigene021251	2.17362	1.32523e-10	1.24441e-08	Unigene029994	-3.59953	2.02688e-16	2.34597e-14	Unigene015655	-1.44808	5.60102e-07	3.01506e-05
Unigene023630	3.24351	1.37278e-10	1.28205e-08	Unigene024426	5.07939	2.09445e-16	2.41101e-14	Unigene031958	-2.52163	6.28252e-07	3.36354e-05
Unigene029273	-9.93505	1.4217e-10	1.32057e-08	Unigene027623	-3.98681	2.22427e-16	2.54661e-14	Unigene020347	1.40803	6.32756e-07	3.36934e-05
Unigene043357	2.74666	1.46152e-10	1.35025e-08	Unigene019451	-1.82119	2.49931e-16	2.84612e-14	Unigene026750	-3.22191	6.62672e-07	3.50967e-05
Unigene034093	-5.73577	1.68386e-10	1.54735e-08	Unigene041874	-1.13114	2.61278e-16	2.95943e-14	Unigene026561	1.18515	6.95609e-07	3.66441e-05
Unigene016525	-2.11686	1.74508e-10	1.59507e-08	Unigene011761	-3.69357	2.79577e-16	3.14986e-14	Unigene019318	-2.08483	7.03443e-07	3.68596e-05
Unigene014536	2.83682	1.82932e-10	1.66323e-08	Unigene019135	-1.52082	2.91776e-16	3.2699e-14	Unigene031852	1.4263	7.50968e-07	3.91417e-05
Unigene021392	-2.49144	2.10736e-10	1.90594e-08	Unigene027284	1.7691	3.49804e-16	3.89957e-14	Unigene037254	-1.5421	7.88681e-07	4.0891e-05
Unigene018788	-3.37486	2.14432e-10	1.92922e-08	Unigene037377	-3.01283	3.8299e-16	4.24718e-14	Unigene021118	1.40713	8.03924e-07	4.14631e-05
Unigene035325	-1.70466	2.3135e-10	2.07058e-08	Unigene013098	2.17544	4.32504e-16	4.74656e-14	Unigene020609	-1.99839	8.16272e-07	4.18807e-05
Unigene035358	2.09648	2.32979e-10	2.07436e-08	Unigene028163	2.16949	4.30336e-16	4.74656e-14	Unigene018706	-3.60066	8.4804e-07	4.32852e-05
Unigene028625	1.8765	2.37423e-10	2.10303e-08	Unigene033427	3.2013	4.62172e-16	5.04601e-14	Unigene038470	-1.83024	9.15071e-07	4.64658e-05
Unigene028515	-2.39159	2.40435e-10	2.11879e-08	Unigene029260	-1.95991	5.73321e-16	6.22745e-14	Unigene016096	1.47057	9.56277e-07	4.83091e-05
Unigene041577	2.39511	2.47614e-10	2.17092e-08	Unigene045371	3.70625	6.13563e-16	6.63055e-14	Unigene029453	-2.52944	9.70636e-07	4.87844e-05
Unigene028857	3.10735	2.5237e-10	2.20139e-08	Unigene050084	-1.74428	8.77716e-16	9.43701e-14	Unigene032218	1.59094	1.03516e-06	5.17634e-05
Unigene028587	1.45255	2.5428e-10	2.20684e-08	Unigene019796	1.67209	9.1765e-16	9.81654e-14	Unigene032438	1.95045	1.05019e-06	5.22498e-05
Unigene040490	-4.13428	2.58565e-10	2.23276e-08	Unigene024205	2.04026	9.71418e-16	1.03395e-13	Unigene018378	-4.6333	1.09213e-06	5.40632e-05
Unigene022824	3.80784	3.30244e-10	2.83745e-08	Unigene027057	2.57695	1.0928e-15	1.15733e-13	Unigene044680	-1.4796	1.11271e-06	5.48066e-05
Unigene033446	-2.3276	3.69732e-10	3.16093e-08	Unigene036750	1.67528	1.12587e-15	1.18642e-13	Unigene028818	2.8164	1.1248e-06	5.51264e-05
Unigene023128	-1.52195	3.96121e-10	3.36977e-08	Unigene018637	1.48296	1.1389e-15	1.19421e-13	Unigene046735	-3.09763	1.15313e-06	5.62349e-05
Unigene023840	-1.68651	4.12596e-10	3.49263e-08	Unigene017441	2.79125	1.44651e-15	1.50929e-13	Unigene045662	-3.13221	1.18258e-06	5.73871e-05
Unigene011564	2.14981	4.38847e-10	3.69664e-08	Unigene023224	2.0407	1.48643e-15	1.54334e-13	Unigene041693	-1.56268	1.19173e-06	5.75478e-05
Unigene021473	1.51433	5.67911e-10	4.76048e-08	Unigene036664	2.9843	1.5032e-15	1.55314e-13	Unigene040722	-3.14214	1.33281e-06	6.39821e-05
Unigene012082	-1.37316	6.04396e-10	5.04172e-08	Unigene026540	-6.86192	1.55972e-15	1.60371e-13	Unigene040827	-2.26198	1.33797e-06	6.39821e-05
Unigene007249	2.78019	6.37828e-10	5.26944e-08	Unigene022644	1.75121	1.56737e-15	1.60379e-13	Unigene018243	-2.34593	1.35761e-06	6.46077e-05
Unigene021583	-2.42492	6.36294e-10	5.26944e-08	Unigene023128	-1.40856	1.63699e-15	1.66698e-13	Unigene022204	-4.00755	1.37917e-06	6.53181e-05
Unigene044357	1.65786	6.90449e-10	5.67687e-08	Unigene045949	-4.49578	1.65781e-15	1.6801e-13	Unigene044120	-1.80642	1.39263e-06	6.56404e-05
Unigene032860	-1.36783	7.16509e-10	5.86309e-08	Unigene027628	-2.44524	1.68755e-15	1.70209e-13	Unigene042229	-2.28956	1.39957e-06	6.5653e-05
Unigene026541	-2.06338	7.47437e-10	6.08719e-08	Unigene045480	-6.86691	1.78132e-15	1.78816e-13	Unigene029994	-2.66373	1.46422e-06	6.83601e-05
Unigene017148	5.11579	7.75594e-10	6.2867e-08	Unigene031379	1.19047	1.9778e-15	1.97603e-13	Unigene011671	1.55488	1.50488e-06	6.99273e-05
Unigene024426	4.14272	8.50576e-10	6.86211e-08	Unigene027576	1.46722	2.36578e-15	2.35256e-13	Unigene015799	-2.32789	1.59029e-06	7.35489e-05
Unigene021869	3.13431	8.74865e-10	7.02508e-08	Unigene032804	-2.48999	2.44834e-15	2.42329e-13	Unigene041739	-1.25236	1.71579e-06	7.89825e-05
Unigene031771	-5.53921	9.00992e-10	7.20123e-08	Unigene023813	2.57509	2.53383e-15	2.49624e-13	Unigene039268	-1.34984	1.72514e-06	7.90434e-05
Unigene024251	-3.77977	9.57014e-10	7.61358e-08	Unigene012082	-1.47369	2.54845e-15	2.49901e-13	Unigene040413	-2.51277	1.74575e-06	7.96176e-05
Unigene039483	-5.51545	1.0552e-09	8.35604e-08	Unigene022217	-3.66104	2.86323e-15	2.79475e-13	Unigene043847	-2.34991	1.95417e-06	8.87122e-05
Unigene039804	-5.51316	1.10951e-09	8.7458e-08	Unigene054215	3.83602	4.72395e-15	4.58981e-13	Unigene034629	1.3327	2.05817e-06	9.3005e-05
Unigene025193	2.6988	1.15465e-09	9.06006e-08	Unigene021281	-3.45975	4.90223e-15	4.74128e-13	Unigene028638	-3.20287	2.08782e-06	9.39136e-05
Unigene041551	1.51001	1.1895e-09	9.29106e-08	Unigene038091	-3.22937	5.09023e-15	4.90074e-13	Unigene017261	1.24204	2.12979e-06	9.53663e-05
Unigene019192	-1.37482	1.24393e-09	9.67226e-08	Unigene045688	3.36205	5.27961e-15	5.06006e-13	Unigene023813	1.47704	2.37528e-06	0.000105878
Unigene014152	-6.3724	1.37633e-09	1.06535e-07	Unigene033989	1.78989	6.47616e-15	6.12373e-13	Unigene017051	2.08772	2.44581e-06	0.00010853
Unigene040277	2.64558	1.54386e-09	1.18967e-07	Unigene037686	1.72749	6.43143e-15	6.12373e-13	Unigene029977	1.66485	2.69537e-06	0.000119068
Unigene029275	-9.35963	1.56068e-09	1.19194e-07	Unigene040727	1.55815	6.47549e-15	6.12373e-13	Unigene021565	1.96221	2.87797e-06	0.000126566
Unigene043835	4.22163	1.55571e-09	1.19194e-07	Unigene030573	-6.83669	7.8933e-15	7.3977e-13	Unigene040780	-2.54798	2.91355e-06	0.000127562
Unigene022262	-1.60898	1.65862e-09	1.26114e-07	Unigene043998	2.19217	7.87769e-15	7.3977e-13	Unigene048150	-1.85263	3.18494e-06	0.000138827
Unigene041752	-2.02977	1.90933e-09	1.44537e-07	Unigene031957	1.80324	8.24699e-15	7.69514e-13	Unigene021004	2.07551	3.47445e-06	0.000150779
Unigene023134	-3.3046	1.9555e-09	1.47383e-07	Unigene022688	3.08682	8.55684e-15	7.94923e-13	Unigene028374	-1.99619	3.52348e-06	0.000152236
Unigene022928	-4.9363	2.03344e-09	1.52588e-07	Unigene039108	-2.792	9.82852e-15	9.09074e-13	Unigene019619	1.03245	3.76503e-06	0.000161962
Unigene034943	-2.26897	2.27476e-09	1.69955e-07	Unigene019181	2.41934	1.05432e-14	9.70941e-13	Unigene020516	1.53598	3.91689e-06	0.000167762
Unigene009932	1.33301	2.63471e-09	1.95995e-07	Unigene025590	1.51046	1.09611e-14	1.00506e-12	Unigene034624	-1.72739	3.95351e-06	0.000168597
Unigene045400	2.21622	2.94903e-09	2.18432e-07	Unigene041577	2.5856	1.26468e-14	1.15462e-12	Unigene043102	1.96945	4.01656e-06	0.000170548
Unigene030468	1.76148	2.98756e-09	2.20336e-07	Unigene017983	2.21134	1.28775e-14	1.17064e-12	Unigene026866	-1.32585	4.12379e-06	0.00017435
Unigene026016	-3.57764	3.03811e-09	2.23106e-07	Unigene029585	1.8519	1.35695e-14	1.22827e-12	Unigene037914	-1.43476	4.2482e-06	0.000178842
Unigene011859	2.5436	3.22485e-09	2.35812e-07	Unigene026683	1.64657	1.75523e-14	1.58202e-12	Unigene028794	-3.86351	4.41239e-06	0.000184964
Unigene034519	1.49516	3.32188e-09	2.41878e-07	Unigene018284	-4.69524	1.76433e-14	1.58348e-12	Unigene019898	-2.78194	4.47017e-06	0.000186592
Unigene028399	-1.37677	3.35074e-09	2.4295e-07	Unigene028236	-3.09663	1.90311e-14	1.70083e-12	Unigene028804	-1.42288	4.52689e-06	0.000187883
Unigene024737	1.86485	3.36917e-09	2.4326e-07	Unigene011671	2.51474	2.09128e-14	1.86115e-12	Unigene042442	-1.10378	4.53925e-06	0.000187883
Unigene016830	-1.69325	3.52143e-09	2.50051e-07	Unigene020992	-5.92283	2.20884e-14	1.95755e-12	Unigene039417	-1.45706	4.56729e-06	0.000188003
Unigene019016	1.86703	3.51244e-09	2.50051e-07	Unigene019318	-2.99727	2.41658e-14	2.13273e-12	Unigene039670	-2.50725	4.94172e-06	0.000201995
Unigene019618	-5.36563	3.50362e-09	2.50051e-07	Unigene021123	-3.49775	2.44508e-14	2.14893e-12	Unigene022835	1.95543	5.15959e-06	0.000210029
Unigene022004	2.49979	3.48188e-09	2.50051e-07	Unigene018602	-2.33788	2.51359e-14	2.19942e-12	Unigene031152	1.39738	5.26597e-06	0.000213478
Unigene020893	-4.32503	3.85513e-09	2.7262e-07	Unigene038549	1.8541	2.52329e-14	2.19942e-12	Unigene035592	-2.97357	5.35614e-06	0.000216243
Unigene020841	1.33211	4.0557e-09	2.84462e-07	Unigene021565	4.57095	2.55628e-14	2.21904e-12	Unigene036071	1.46463	5.43905e-06	0.000218694
Unigene030466	-4.85514	4.05129e-09	2.84462e-07	Unigene023133	-2.5383	3.52923e-14	3.05113e-12	Unigene022766	1.23107	5.56268e-06	0.000222756
Unigene023927	1.45024	4.16e-09	2.90591e-07	Unigene035402	-6.53929	4.80159e-14	4.13425e-12	Unigene033095	1.37294	5.66584e-06	0.000225968
Unigene024275	-3.77999	4.21184e-09	2.93022e-07	Unigene022442	-1.67978	4.85905e-14	4.16678e-12	Unigene024277	-1.65153	5.84603e-06	0.000232215
Unigene024796	3.26264	4.27879e-09	2.96479e-07	Unigene031282	2.12186	4.94844e-14	4.22633e-12	Unigene016022	-1.42649	6.26173e-06	0.000247728
Unigene026454	-5.33786	4.30646e-09	2.97198e-07	Unigene018480	-4.50975	5.00273e-14	4.25553e-12	Unigene035031	1.90868	6.51207e-06	0.000256601
Unigene027057	2.10025	4.46338e-09	3.06795e-07	Unigene048372	-2.13476	5.17467e-14	4.38418e-12	Unigene017601	-6.27551	6.56005e-06	0.000257463
Unigene024579	1.44995	4.4944e-09	3.07696e-07	Unigene023927	1.49477	5.93005e-14	5.0012e-12	Unigene029190	1.48308	6.82106e-06	0.000266644
Unigene025790	-8.17975	4.54074e-09	3.09635e-07	Unigene032905	1.66941	5.95015e-14	5.0012e-12	Unigene034198	1.63486	7.0836e-06	0.000275812
Unigene017823	-2.21275	4.73436e-09	3.21562e-07	Unigene017132	-11.5437	5.98857e-14	5.01359e-12	Unigene033614	-1.78342	8.11122e-06	0.000313348
Unigene048334	2.45608	4.81178e-09	3.25534e-07	Unigene036557	1.36319	7.32437e-14	6.10778e-12	Unigene027623	-2.72167	8.318e-06	0.00032008
Unigene021486	1.32249	5.01762e-09	3.38129e-07	Unigene037907	-3.03275	7.54057e-14	6.2634e-12	Unigene036533	1.26249	8.51375e-06	0.000326338
Unigene038596	1.71266	5.16851e-09	3.46936e-07	Unigene018981	2.18916	7.70606e-14	6.37586e-12	Unigene032821	-2.29888	8.56956e-06	0.000327204
Unigene028718	1.86999	5.3102e-09	3.5506e-07	Unigene019352	-1.66659	7.98298e-14	6.57928e-12	Unigene015982	-4.89722	8.71684e-06	0.000331543
Unigene015421	2.90216	5.33132e-09	3.55091e-07	Unigene041876	2.47758	8.43882e-14	6.92801e-12	Unigene026325	-2.11503	8.89853e-06	0.000337152
Unigene045145	1.70259	5.48484e-09	3.63905e-07	Unigene022218	-3.72205	9.1512e-14	7.48384e-12	Unigene030591	-2.20405	9.17199e-06	0.000346181
Unigene014529	-1.747	5.74076e-09	3.7942e-07	Unigene025153	-1.91938	9.38141e-14	7.6426e-12	Unigene025248	-1.94356	9.79507e-06	0.000368287
Unigene027687	-3.38808	6.10819e-09	4.02158e-07	Unigene055009	2.66714	9.77538e-14	7.93304e-12	Unigene024243	-1.24934	9.8518e-06	0.000369012
Unigene022643	1.6649	6.23105e-09	4.07823e-07	Unigene033446	-2.88797	1.09719e-13	8.8701e-12	Unigene017539	-1.24371	9.98742e-06	0.000372675
Unigene024042	3.58802	6.24171e-09	4.07823e-07	Unigene028575	1.52997	1.16031e-13	9.34469e-12	Unigene023196	1.53666	1.00327e-05	0.000372951
Unigene036664	2.51578	6.33489e-09	4.12344e-07	Unigene053912	-5.91215	1.23397e-13	9.90031e-12	Unigene025329	1.4793	1.08909e-05	0.000403332
Unigene029270	-8.11502	6.36191e-09	4.1254e-07	Unigene039670	-3.54036	1.36822e-13	1.09359e-11	Unigene031957	1.04598	1.13442e-05	0.000416986
Unigene020012	-1.43227	6.53847e-09	4.22395e-07	Unigene019017	2.08422	1.43304e-13	1.138e-11	Unigene044042	-2.67841	1.13026e-05	0.000416986
Unigene035830	-2.85184	6.63551e-09	4.27058e-07	Unigene024058	1.41994	1.43452e-13	1.138e-11	Unigene041289	-2.27084	1.1728e-05	0.000429487
Unigene021949	1.44816	7.47135e-09	4.79058e-07	Unigene017896	1.45446	1.52905e-13	1.20678e-11	Unigene028663	-2.72687	1.17832e-05	0.000429911
Unigene019263	2.08557	7.97747e-09	5.09609e-07	Unigene030230	-2.46665	1.53262e-13	1.20678e-11	Unigene022422	-1.75036	1.21216e-05	0.000440628
Unigene014168	-4.77297	8.25917e-09	5.24185e-07	Unigene026777	-5.75694	1.61741e-13	1.26883e-11	Unigene036538	-1.74304	1.24598e-05	0.000451256
Unigene037310	-2.67421	8.26665e-09	5.24185e-07	Unigene018942	1.98638	2.03628e-13	1.59153e-11	Unigene046968	-2.12019	1.25974e-05	0.000454567
Unigene029274	-8.91817	8.84091e-09	5.58538e-07	Unigene024309	-4.56898	2.26211e-13	1.76153e-11	Unigene036035	-1.45883	1.27897e-05	0.000459025
Unigene042232	-3.07598	9.22802e-09	5.80858e-07	Unigene016089	2.26183	2.33262e-13	1.80979e-11	Unigene044525	1.19635	1.28141e-05	0.000459025
Unigene033096	-2.28336	9.45639e-09	5.93061e-07	Unigene024089	2.67181	2.37411e-13	1.83526e-11	Unigene010642	1.14987	1.35519e-05	0.000483695
Unigene014406	-6.04485	1.02726e-08	6.41904e-07	Unigene029285	-4.95959	2.52333e-13	1.94351e-11	Unigene036895	-1.69575	1.4417e-05	0.000512714
Unigene024872	-7.95228	1.16356e-08	7.24445e-07	Unigene032459	-2.37759	2.54997e-13	1.95692e-11	Unigene021934	-1.93235	1.45828e-05	0.000516745
Unigene022445	1.34985	1.20774e-08	7.49237e-07	Unigene018788	-4.96777	3.01818e-13	2.30787e-11	Unigene021729	1.20024	1.47016e-05	0.000519087
Unigene028236	-2.29241	1.26406e-08	7.81353e-07	Unigene003255	4.18936	3.42791e-13	2.61174e-11	Unigene034535	-1.62759	1.48217e-05	0.00052146
Unigene033380	-2.14223	1.27864e-08	7.87533e-07	Unigene031097	1.41422	4.04748e-13	3.07275e-11	Unigene022323	-2.25337	1.4987e-05	0.000525397
Unigene023167	2.22906	1.34563e-08	8.2583e-07	Unigene017051	4.11762	4.34439e-13	3.28638e-11	Unigene033948	2.14595	1.63481e-05	0.000571081
Unigene029585	1.62052	1.374e-08	8.40245e-07	Unigene026744	1.56482	4.51762e-13	3.40526e-11	Unigene039855	-2.55363	1.65673e-05	0.000576694
Unigene011873	3.82416	1.3944e-08	8.49691e-07	Unigene013099	2.2187	5.28776e-13	3.97164e-11	Unigene034108	-1.32557	1.67548e-05	0.000581166
Unigene018567	1.61756	1.43808e-08	8.73216e-07	Unigene029322	1.62008	5.99028e-13	4.4834e-11	Unigene025566	-2.01141	1.7007e-05	0.000587847
Unigene000755	-4.7	1.63029e-08	9.8298e-07	Unigene019074	1.41935	7.7799e-13	5.80232e-11	Unigene013562	-2.23716	1.78739e-05	0.000615651
Unigene035803	-3.21246	1.62884e-08	9.8298e-07	Unigene031795	-3.33657	7.87953e-13	5.85601e-11	Unigene046982	1.34071	1.83842e-05	0.00063102
Unigene007768	-4.13464	1.65328e-08	9.93357e-07	Unigene017315	-9.96061	8.53362e-13	6.31995e-11	Unigene029530	1.94848	1.9093e-05	0.000653072
Unigene019259	2.93161	1.66336e-08	9.95927e-07	Unigene007249	3.06472	9.54181e-13	7.04199e-11	Unigene013027	-4.03988	2.13615e-05	0.0007246
Unigene038006	-4.13108	1.69993e-08	1.01429e-06	Unigene037235	1.45553	9.99368e-13	7.34986e-11	Unigene017525	-2.25315	2.14048e-05	0.0007246
Unigene036791	-5.15813	1.79131e-08	1.06512e-06	Unigene046985	2.47123	1.26295e-12	9.25628e-11	Unigene019727	1.03497	2.13728e-05	0.0007246
Unigene044486	1.836	1.80204e-08	1.0678e-06	Unigene029941	-2.70778	1.43718e-12	1.04969e-10	Unigene029207	-2.74366	2.15604e-05	0.000727369
Unigene035925	-3.63801	1.90187e-08	1.12308e-06	Unigene021223	1.79231	1.58416e-12	1.15307e-10	Unigene024700	1.77816	2.2173e-05	0.000745482
Unigene034684	-4.11361	1.91197e-08	1.12518e-06	Unigene030533	-4.63047	1.6262e-12	1.17961e-10	Unigene004753	-3.68197	2.29922e-05	0.000767783
Unigene043871	1.91622	2.02259e-08	1.18622e-06	Unigene027570	1.78304	1.73001e-12	1.25063e-10	Unigene015328	1.12294	2.32476e-05	0.000773689
Unigene022580	2.60171	2.03811e-08	1.19126e-06	Unigene039416	-3.12318	1.74494e-12	1.25713e-10	Unigene039092	-2.10342	2.35004e-05	0.000779471
Unigene039864	1.76625	2.05903e-08	1.1994e-06	Unigene043151	-1.38036	1.76484e-12	1.26715e-10	Unigene044571	-1.9853	2.52503e-05	0.000831908
Unigene025348	2.66563	2.12677e-08	1.23467e-06	Unigene009980	1.40405	1.94496e-12	1.39177e-10	Unigene025193	-1.59724	2.62247e-05	0.000861132
Unigene022358	1.59197	2.29185e-08	1.32603e-06	Unigene035697	-2.40476	2.09147e-12	1.49156e-10	Unigene037596	-1.65308	2.66416e-05	0.000871914
Unigene014815	-8.6465	2.3589e-08	1.36024e-06	Unigene044304	7.37595	2.23316e-12	1.58727e-10	Unigene017185	-1.75092	2.74996e-05	0.000894055
Unigene018266	-1.74951	2.5249e-08	1.4511e-06	Unigene030326	3.65857	2.90652e-12	2.05896e-10	Unigene023269	1.15997	2.74883e-05	0.000894055
Unigene037907	-2.0648	2.62758e-08	1.50508e-06	Unigene036063	-2.32865	3.25657e-12	2.29925e-10	Unigene040542	-2.16657	2.78466e-05	0.0008994
Unigene019204	1.28361	2.73119e-08	1.55923e-06	Unigene027139	-5.49206	3.39074e-12	2.38602e-10	Unigene015614	1.39635	2.87939e-05	0.000926956
Unigene030688	-2.69734	2.89965e-08	1.64992e-06	Unigene026928	1.26567	3.54633e-12	2.48725e-10	Unigene008803	-1.87215	3.10637e-05	0.000996771
Unigene022550	-3.49704	2.93366e-08	1.66285e-06	Unigene031431	4.13544	3.64391e-12	2.54725e-10	Unigene023630	-1.83491	3.16253e-05	0.0010115
Unigene025715	-5.87279	2.94173e-08	1.66285e-06	Unigene022012	3.45955	3.68488e-12	2.56741e-10	Unigene020130	1.80967	3.20669e-05	0.0010223
Unigene029712	-2.05672	2.98546e-08	1.68204e-06	Unigene037307	2.3399	4.10334e-12	2.8496e-10	Unigene031045	-1.42393	3.26465e-05	0.00103409
Unigene020509	1.26793	3.09812e-08	1.73981e-06	Unigene023631	2.22734	4.19565e-12	2.90419e-10	Unigene038775	-1.24126	3.25467e-05	0.00103409
Unigene047807	3.27679	3.11103e-08	1.74137e-06	Unigene024661	-2.25861	4.28962e-12	2.94426e-10	Unigene019861	-5.86112	3.30744e-05	0.00104428
Unigene025249	-2.03654	3.39584e-08	1.89462e-06	Unigene027964	-9.63638	4.29525e-12	2.94426e-10	Unigene047352	-1.99888	3.37433e-05	0.001062
Unigene026176	-1.27356	3.51212e-08	1.95315e-06	Unigene038901	-5.47806	4.28983e-12	2.94426e-10	Unigene047016	-1.2418	3.5177e-05	0.00110359
Unigene035175	1.92967	3.71588e-08	2.0598e-06	Unigene029215	-4.62138	4.32868e-12	2.95339e-10	Unigene016872	1.25404	3.62074e-05	0.00113232
Unigene025370	-4.30994	3.82525e-08	2.11361e-06	Unigene038257	-6.06856	4.33645e-12	2.95339e-10	Unigene024016	2.93896	3.67327e-05	0.00113899
Unigene022587	3.26103	4.15293e-08	2.2873e-06	Unigene018273	-6.06835	4.4363e-12	3.01171e-10	Unigene036522	-1.65277	3.67163e-05	0.00113899
Unigene013563	-8.49951	4.26273e-08	2.34028e-06	Unigene018097	1.50054	4.56765e-12	3.09097e-10	Unigene045002	-1.84301	3.67677e-05	0.00113899
Unigene053158	-8.48639	4.39881e-08	2.4073e-06	Unigene028980	-5.06154	4.73177e-12	3.19183e-10	Unigene019311	-2.27122	3.76014e-05	0.00116116
Unigene029886	3.01803	4.6702e-08	2.54771e-06	Unigene037310	-3.72185	5.02574e-12	3.37937e-10	Unigene039779	-1.2341	3.81862e-05	0.00117554
Unigene017456	-4.57117	4.70997e-08	2.56127e-06	Unigene027725	-3.48686	5.30584e-12	3.55642e-10	Unigene043874	-1.5691	4.12199e-05	0.00126498
Unigene028638	4.62223	4.76313e-08	2.58201e-06	Unigene030507	1.65213	5.56844e-12	3.72067e-10	Unigene017320	-2.68379	4.1555e-05	0.00126745
Unigene044304	5.83119	4.91062e-08	2.65359e-06	Unigene024030	2.00112	5.90623e-12	3.93396e-10	Unigene017948	-2.53939	4.1558e-05	0.00126745
Unigene043263	1.60242	5.64108e-08	3.03876e-06	Unigene035704	-10.6716	6.055e-12	4.0204e-10	Unigene026387	-1.36543	4.34088e-05	0.00131982
Unigene022848	1.33716	5.71757e-08	3.0657e-06	Unigene015328	1.92654	6.17168e-12	4.08507e-10	Unigene019804	2.4057	4.36184e-05	0.00132211
Unigene032518	1.49488	5.72678e-08	3.0657e-06	Unigene023445	3.41343	8.72576e-12	5.75764e-10	Unigene026019	-1.10392	4.38043e-05	0.00132367
Unigene020985	1.23261	6.3366e-08	3.38162e-06	Unigene035986	-4.46847	9.11478e-12	5.99566e-10	Unigene019049	-1.34304	4.40353e-05	0.00132658
Unigene023135	-2.54927	6.35671e-08	3.38185e-06	Unigene025249	-2.48155	9.38254e-12	6.15268e-10	Unigene014529	1.20629	4.49728e-05	0.00134251
Unigene007839	1.916	6.91533e-08	3.66768e-06	Unigene017328	2.112	1.00923e-11	6.59768e-10	Unigene042279	-1.58713	4.47111e-05	0.00134251
Unigene041289	2.82004	7.19169e-08	3.80252e-06	Unigene029077	-7.00681	1.04196e-11	6.79068e-10	Unigene044842	-2.01229	4.89693e-05	0.00144864
Unigene035322	-3.05223	7.57955e-08	3.9953e-06	Unigene022664	1.25917	1.16721e-11	7.58367e-10	Unigene022054	-4.47382	4.92974e-05	0.00145398
Unigene003255	3.41262	8.63297e-08	4.52283e-06	Unigene022000	-5.96126	1.25989e-11	8.16078e-10	Unigene033527	-1.92977	5.08515e-05	0.00149534
Unigene021855	-3.9648	8.62948e-08	4.52283e-06	Unigene026750	-3.80171	1.27645e-11	8.24283e-10	Unigene018339	1.77693	5.15917e-05	0.00150364
Unigene041229	3.36902	9.13363e-08	4.77058e-06	Unigene020264	-9.39371	1.38587e-11	8.92225e-10	Unigene042882	-1.73418	5.14934e-05	0.00150364
Unigene022644	1.40504	9.17535e-08	4.77785e-06	Unigene022086	-3.9913	1.47768e-11	9.48448e-10	Unigene035702	-2.71904	5.22817e-05	0.00151925
Unigene025315	1.4613	9.29885e-08	4.82753e-06	Unigene018246	-5.50244	1.54179e-11	9.86606e-10	Unigene001160	-3.57655	5.31747e-05	0.00153652
Unigene024243	1.6485	9.37748e-08	4.85369e-06	Unigene024192	1.56402	1.89407e-11	1.20838e-09	Unigene027221	-2.27548	5.31879e-05	0.00153652
Unigene017469	2.72872	9.64945e-08	4.97876e-06	Unigene030785	-3.29866	1.96809e-11	1.25184e-09	Unigene040721	-1.23427	5.48277e-05	0.00157926
Unigene047461	1.71744	9.67706e-08	4.97876e-06	Unigene029270	-10.3422	2.05577e-11	1.30369e-09	Unigene027407	-1.80044	5.53524e-05	0.00158973
Unigene020647	1.3912	9.96403e-08	5.1111e-06	Unigene020344	1.46113	2.17392e-11	1.3745e-09	Unigene041980	-1.51641	5.57017e-05	0.00159511
Unigene040732	-1.42358	1.13965e-07	5.8285e-06	Unigene033379	-9.28649	2.23505e-11	1.40895e-09	Unigene034209	-1.11751	5.71193e-05	0.00163096
Unigene018602	-1.653	1.16655e-07	5.93075e-06	Unigene029228	2.17307	2.31771e-11	1.45672e-09	Unigene037189	-2.20879	5.8013e-05	0.00164693
Unigene030164	1.33074	1.16483e-07	5.93075e-06	Unigene041440	1.29925	2.53153e-11	1.5864e-09	Unigene030559	-1.37155	5.84187e-05	0.00165369
Unigene030785	-2.37609	1.1801e-07	5.98196e-06	Unigene018834	-3.25036	2.54588e-11	1.59068e-09	Unigene041563	-1.86946	5.9187e-05	0.00167063
Unigene033614	2.2159	1.21556e-07	6.14359e-06	Unigene043263	2.122	3.25764e-11	2.02941e-09	Unigene031431	1.70424	5.98458e-05	0.0016844
Unigene025088	-1.19529	1.22856e-07	6.173e-06	Unigene033096	-2.47685	3.29375e-11	2.04589e-09	Unigene019181	1.14919	6.02218e-05	0.00169016
Unigene032213	1.23139	1.22653e-07	6.173e-06	Unigene032811	-2.69706	3.30776e-11	2.04859e-09	Unigene041025	-1.58235	6.19714e-05	0.00173432
Unigene030490	2.15589	1.2706e-07	6.36561e-06	Unigene019727	1.53545	3.40236e-11	2.10103e-09	Unigene028109	-1.48658	6.40927e-05	0.0017886
Unigene042967	-3.03995	1.30918e-07	6.53982e-06	Unigene025465	-6.83562	3.43872e-11	2.11731e-09	Unigene046212	-1.43734	6.59898e-05	0.00183117
Unigene029841	1.40776	1.31762e-07	6.56288e-06	Unigene012221	2.32906	3.70173e-11	2.27265e-09	Unigene038938	-2.6758	6.7327e-05	0.00186303
Unigene037372	1.9744	1.38462e-07	6.8767e-06	Unigene024872	-10.1645	3.76671e-11	2.30586e-09	Unigene039026	-1.32653	6.88919e-05	0.00190099
Unigene036537	1.83947	1.40834e-07	6.97432e-06	Unigene031859	-4.59428	3.78447e-11	2.31005e-09	Unigene003816	2.71944	7.01273e-05	0.00192968
Unigene034111	1.94126	1.42391e-07	7.03119e-06	Unigene044087	1.08011	4.50933e-11	2.7446e-09	Unigene036699	-1.3541	7.16054e-05	0.00196486
Unigene016507	4.09766	1.45675e-07	7.17273e-06	Unigene024612	1.2784	4.85977e-11	2.94942e-09	Unigene021561	-3.89982	7.42519e-05	0.00203182
Unigene033060	-2.19708	1.48885e-07	7.30984e-06	Unigene032218	1.97848	4.99492e-11	3.02278e-09	Unigene047574	-2.49532	7.96846e-05	0.00216246
Unigene026295	1.27195	1.56286e-07	7.65136e-06	Unigene025960	2.33284	5.0291e-11	3.0348e-09	Unigene031280	-1.07921	8.02109e-05	0.00217076
Unigene015684	1.60362	1.58666e-07	7.74581e-06	Unigene031276	2.74708	5.15755e-11	3.10347e-09	Unigene018711	-2.87072	8.11041e-05	0.00218892
Unigene035996	-2.68062	1.60554e-07	7.81575e-06	Unigene031280	1.92528	5.535e-11	3.32116e-09	Unigene045311	-1.31304	8.17917e-05	0.00220145
Unigene034017	2.15652	1.61559e-07	7.84246e-06	Unigene046952	-1.45323	5.76068e-11	3.44681e-09	Unigene041948	-1.59165	8.27908e-05	0.00222227
Unigene026237	1.16648	1.62654e-07	7.87339e-06	Unigene035546	1.52516	5.88481e-11	3.51116e-09	Unigene017680	-2.87983	8.63296e-05	0.00231096
Unigene020861	1.74973	1.65133e-07	7.97091e-06	Unigene029231	1.96289	6.39575e-11	3.80529e-09	Unigene016858	-2.01158	8.69481e-05	0.00232121
Unigene028575	1.29988	1.67666e-07	8.07053e-06	Unigene036327	1.84201	6.41684e-11	3.80715e-09	Unigene021254	1.81289	9.11832e-05	0.00241464
Unigene010588	-2.27724	1.71863e-07	8.24942e-06	Unigene041449	-2.82761	6.48304e-11	3.83568e-09	Unigene025823	1.25405	9.07988e-05	0.00241464
Unigene022086	-2.38468	1.77339e-07	8.48855e-06	Unigene023167	2.59719	6.67862e-11	3.93267e-09	Unigene048453	-2.11101	9.0985e-05	0.00241464
Unigene020764	-1.18626	1.92481e-07	9.18774e-06	Unigene031793	-1.45237	6.68411e-11	3.93267e-09	Unigene034013	1.73449	9.33701e-05	0.00246592
Unigene011498	1.53185	1.94038e-07	9.23642e-06	Unigene014907	-10.0249	6.73448e-11	3.95133e-09	Unigene036860	1.06142	9.39189e-05	0.00247378
Unigene027155	-4.80007	2.16333e-07	1.02693e-05	Unigene043720	3.9839	7.1374e-11	4.17617e-09	Unigene021266	-1.49305	9.42478e-05	0.00247583
Unigene017601	3.0028	2.28803e-07	1.08313e-05	Unigene026718	1.32732	8.22192e-11	4.79748e-09	Unigene023512	2.45063	9.50441e-05	0.0024835
Unigene043410	1.75815	2.34957e-07	1.10921e-05	Unigene024796	3.42383	8.3202e-11	4.84149e-09	Unigene051719	1.8036	9.5021e-05	0.0024835
Unigene019072	-5.50736	2.38125e-07	1.11927e-05	Unigene017612	-2.85751	8.69996e-11	5.0486e-09	Unigene031962	-1.21093	9.6859e-05	0.00252423
Unigene031097	1.27974	2.38393e-07	1.11927e-05	Unigene043590	-3.23311	1.00009e-10	5.78766e-09	Unigene038496	-1.49513	9.75636e-05	0.00253588
Unigene019352	-1.33224	2.45e-07	1.14716e-05	Unigene014458	-3.72962	1.0218e-10	5.89722e-09	Unigene006476	-4.33273	9.8434e-05	0.00255177
Unigene039108	-1.90347	2.51746e-07	1.17554e-05	Unigene034092	1.31712	1.07171e-10	6.16846e-09	Unigene018088	1.50946	0.000101647	0.00262127
Unigene021596	-2.68291	2.57027e-07	1.19372e-05	Unigene026705	-9.92294	1.1392e-10	6.53916e-09	Unigene030719	-3.44655	0.000101581	0.00262127
Unigene023569	-4.77418	2.5681e-07	1.19372e-05	Unigene024092	-5.72188	1.21076e-10	6.9311e-09	Unigene027465	-1.33018	0.000102049	0.00262476
Unigene034102	-1.44296	2.67968e-07	1.24118e-05	Unigene058156	2.56329	1.25087e-10	7.1414e-09	Unigene024956	-1.03312	0.000103945	0.00266658
Unigene022586	-2.93916	2.75237e-07	1.27111e-05	Unigene022421	-3.71264	1.41037e-10	8.03036e-09	Unigene036052	-1.2903	0.000105591	0.00270177
Unigene030609	2.80405	2.75911e-07	1.27111e-05	Unigene021118	1.82297	1.45208e-10	8.24572e-09	Unigene017274	1.5198	0.000109306	0.00278236
Unigene006442	3.84656	2.86982e-07	1.31507e-05	Unigene032722	1.51168	1.55593e-10	8.81183e-09	Unigene023524	1.23443	0.000112362	0.00285277
Unigene027312	-2.71589	2.86874e-07	1.31507e-05	Unigene014319	-9.82966	1.56756e-10	8.85397e-09	Unigene028192	-1.1997	0.000115583	0.00291951
Unigene037191	-5.46984	2.95493e-07	1.35047e-05	Unigene033059	1.57962	1.60417e-10	9.03666e-09	Unigene021326	1.36077	0.000116114	0.00292542
Unigene026072	-3.497	3.03887e-07	1.38514e-05	Unigene027026	-3.4316	1.65053e-10	9.27319e-09	Unigene019325	-1.01265	0.000117349	0.002949
Unigene026069	1.47874	3.09899e-07	1.40881e-05	Unigene014718	2.59707	1.76041e-10	9.86437e-09	Unigene030264	-2.33009	0.000118078	0.00295865
Unigene038552	1.98855	3.18261e-07	1.44301e-05	Unigene037180	1.22515	1.78493e-10	9.97536e-09	Unigene034728	-1.60923	0.000118334	0.00295865
Unigene049651	3.98082	3.20232e-07	1.44812e-05	Unigene029273	-9.86103	1.80552e-10	1.00639e-08	Unigene039681	-1.39655	0.000119424	0.00297834
Unigene021445	1.50146	3.36904e-07	1.51952e-05	Unigene028128	1.23954	1.8766e-10	1.04326e-08	Unigene046726	-1.09096	0.000120158	0.00298909
Unigene037180	1.17126	3.4033e-07	1.53095e-05	Unigene023287	2.06411	1.93733e-10	1.0742e-08	Unigene022333	-2.00366	0.000126988	0.0031431
Unigene016026	-7.93209	3.42712e-07	1.53764e-05	Unigene044525	1.64627	1.96039e-10	1.08415e-08	Unigene013440	-3.31957	0.000131229	0.00323185
Unigene042936	-2.21214	3.52915e-07	1.5793e-05	Unigene042189	1.77855	2.01224e-10	1.10993e-08	Unigene020921	-3.31957	0.000131229	0.00323185
Unigene006691	-1.58283	3.55939e-07	1.58869e-05	Unigene034108	-1.76642	2.03824e-10	1.12135e-08	Unigene025286	-1.73219	0.000137397	0.0033682
Unigene013905	2.90866	3.76027e-07	1.674e-05	Unigene027624	1.43377	2.07096e-10	1.1364e-08	Unigene036392	1.46368	0.00013745	0.0033682
Unigene045018	-5.4304	3.77199e-07	1.67488e-05	Unigene032898	-1.62004	2.08582e-10	1.14159e-08	Unigene011099	-3.36248	0.000138978	0.00339719
Unigene033159	-3.99571	3.96195e-07	1.7547e-05	Unigene021382	1.94326	2.49478e-10	1.36191e-08	Unigene023749	1.09333	0.000139609	0.00340418
Unigene029452	-2.57799	3.97306e-07	1.75509e-05	Unigene027243	1.78718	2.5426e-10	1.38444e-08	Unigene030553	1.49349	0.000140617	0.00342028
Unigene038199	-4.7024	4.11052e-07	1.81116e-05	Unigene035326	-4.45558	2.5676e-10	1.39447e-08	Unigene020172	-1.18535	0.000149079	0.00359945
Unigene018934	1.84414	4.12478e-07	1.81279e-05	Unigene033527	-2.73655	2.65607e-10	1.43883e-08	Unigene045701	-1.25403	0.000148858	0.00359945
Unigene038914	2.5483	4.19469e-07	1.83881e-05	Unigene016823	-2.17988	3.00715e-10	1.62486e-08	Unigene045125	-2.22094	0.00015026	0.00361909
Unigene026544	4.75599	4.23769e-07	1.85294e-05	Unigene023524	2.08066	3.06672e-10	1.65283e-08	Unigene014562	2.21191	0.000154631	0.00370626
Unigene027905	-2.68867	4.43156e-07	1.93279e-05	Unigene025346	-6.53081	3.17289e-10	1.70571e-08	Unigene036168	-1.45656	0.000155743	0.00372384
Unigene038928	-5.39403	4.48683e-07	1.95194e-05	Unigene019259	3.61588	3.25065e-10	1.74309e-08	Unigene042573	-1.04135	0.00015757	0.00375842
Unigene028332	-2.4137	4.62649e-07	2.00762e-05	Unigene028332	-3.37338	3.39694e-10	1.81693e-08	Unigene011859	-1.4176	0.000158997	0.0037651
Unigene018260	1.7908	4.69594e-07	2.03262e-05	Unigene040490	-3.63189	3.53625e-10	1.88668e-08	Unigene038756	-1.7848	0.000158779	0.0037651
Unigene023938	1.86965	4.79514e-07	2.07034e-05	Unigene027086	-1.08423	3.56227e-10	1.89104e-08	Unigene030238	-1.65127	0.000161253	0.00380206
Unigene036176	-2.55608	4.86244e-07	2.09414e-05	Unigene036354	1.93801	3.55387e-10	1.89104e-08	Unigene045328	1.67468	0.00016133	0.00380206
Unigene034416	1.9215	4.88477e-07	2.0985e-05	Unigene018374	1.22612	3.7673e-10	1.99488e-08	Unigene012107	2.21115	0.00016237	0.00381744
Unigene026325	2.40918	5.5913e-07	2.39603e-05	Unigene025449	-4.44114	3.84454e-10	2.0307e-08	Unigene024631	-3.191	0.000164831	0.00386608
Unigene032804	-1.56329	5.8356e-07	2.4945e-05	Unigene022708	1.36877	3.9884e-10	2.10145e-08	Unigene041931	1.01839	0.000168001	0.00393106
Unigene037254	1.61401	5.967e-07	2.54434e-05	Unigene020509	1.08394	4.08776e-10	2.14723e-08	Unigene017323	1.33153	0.000170446	0.00396817
Unigene034733	1.49974	6.00831e-07	2.55562e-05	Unigene024904	1.48064	4.10571e-10	2.14723e-08	Unigene032940	1.44746	0.000170692	0.00396817
Unigene033427	2.25966	6.21746e-07	2.63804e-05	Unigene030312	1.50151	4.09835e-10	2.14723e-08	Unigene037888	-1.33461	0.000170795	0.00396817
Unigene023631	1.77109	6.23787e-07	2.64018e-05	Unigene024596	1.24327	4.39942e-10	2.29518e-08	Unigene030263	-2.24582	0.000172068	0.00398834
Unigene016580	-4.65215	6.37293e-07	2.69072e-05	Unigene035996	-4.39367	4.41114e-10	2.29564e-08	Unigene017328	1.09307	0.000179459	0.00414018
Unigene029455	-3.02677	6.42803e-07	2.70733e-05	Unigene017261	1.47832	5.16261e-10	2.68013e-08	Unigene043417	2.67644	0.000180563	0.00415591
Unigene026415	1.50492	6.66706e-07	2.80114e-05	Unigene019832	1.66547	6.01007e-10	3.11245e-08	Unigene040142	-1.25618	0.000184324	0.00423258
Unigene027139	-2.36474	7.05889e-07	2.95853e-05	Unigene017529	1.86299	6.08627e-10	3.14423e-08	Unigene036968	-2.00878	0.000185753	0.00425547
Unigene017449	-3.11555	7.15534e-07	2.99166e-05	Unigene024873	1.48545	6.44399e-10	3.32093e-08	Unigene027242	-1.67339	0.000191544	0.00433769
Unigene037192	-3.91949	7.18635e-07	2.99734e-05	Unigene027087	-3.09089	6.50147e-10	3.34242e-08	Unigene029686	-1.44044	0.000191224	0.00433769
Unigene016831	-2.14696	7.55578e-07	3.14379e-05	Unigene021400	1.74186	6.68843e-10	3.43021e-08	Unigene032292	-1.06663	0.000190624	0.00433769
Unigene024504	1.87293	7.69738e-07	3.19497e-05	Unigene018491	1.18116	6.96935e-10	3.56565e-08	Unigene040673	-1.81977	0.000191262	0.00433769
Unigene019796	1.24107	8.01151e-07	3.30236e-05	Unigene012465	-1.39333	7.1156e-10	3.6317e-08	Unigene033380	-2.41875	0.000205044	0.00463278
Unigene028169	1.39586	8.01376e-07	3.30236e-05	Unigene042232	-3.40447	7.13402e-10	3.63235e-08	Unigene019643	-1.40827	0.000210406	0.00474304
Unigene030152	1.91396	7.99504e-07	3.30236e-05	Unigene021869	3.09218	7.15414e-10	3.63385e-08	Unigene046752	-2.47103	0.000213774	0.00480795
Unigene026683	1.30983	8.25198e-07	3.39239e-05	Unigene016831	-2.70964	7.30691e-10	3.70257e-08	Unigene014536	1.02833	0.000214819	0.00482047
Unigene020028	2.68685	8.5171e-07	3.49303e-05	Unigene013631	3.92445	7.84091e-10	3.96368e-08	Unigene028299	-1.87697	0.000219039	0.00490398
Unigene022665	-4.59474	8.62573e-07	3.52916e-05	Unigene035803	-3.94842	7.94916e-10	4.00884e-08	Unigene038841	1.52575	0.00021987	0.00491142
Unigene037307	1.87692	8.81642e-07	3.59861e-05	Unigene018499	1.44006	8.03777e-10	4.0439e-08	Unigene006957	-5.32612	0.000222825	0.00496617
Unigene022392	2.34693	8.84255e-07	3.60072e-05	Unigene025741	1.63055	8.56686e-10	4.29988e-08	Unigene021340	1.61452	0.000236563	0.00524861
Unigene026399	1.66031	8.91522e-07	3.61069e-05	Unigene018459	3.69173	8.58773e-10	4.30016e-08	Unigene039688	-1.26526	0.000244268	0.00539435
Unigene038716	-2.79463	8.91647e-07	3.61069e-05	Unigene041448	-6.36599	8.8312e-10	4.41164e-08	Unigene044304	1.21223	0.000244774	0.00539435
Unigene047004	1.89977	8.93007e-07	3.61069e-05	Unigene034416	2.12441	9.23179e-10	4.60091e-08	Unigene046143	-1.36862	0.000250613	0.00551068
Unigene022708	1.31601	9.03728e-07	3.64546e-05	Unigene027729	-6.35336	9.63031e-10	4.78826e-08	Unigene026101	-1.66512	0.000258578	0.00567316
Unigene018752	1.42832	9.28416e-07	3.73628e-05	Unigene036301	-1.32065	1.00093e-09	4.96503e-08	Unigene043827	-1.16886	0.000267364	0.00582699
Unigene021170	1.713	9.30792e-07	3.73709e-05	Unigene021949	-1.69254	1.24715e-09	6.17192e-08	Unigene045226	-1.39603	0.000273624	0.00595026
Unigene038609	1.56607	9.48162e-07	3.78912e-05	Unigene027716	2.40077	1.26264e-09	6.23405e-08	Unigene043012	-1.20329	0.000277416	0.00601944
Unigene040691	2.11565	9.46539e-07	3.78912e-05	Unigene036004	-6.31381	1.29167e-09	6.36254e-08	Unigene034041	-1.25679	0.000283636	0.00614088
Unigene025641	3.4649	9.92837e-07	3.95845e-05	Unigene022016	-2.2372	1.29742e-09	6.37601e-08	Unigene035032	1.50911	0.000289871	0.00626211
Unigene004753	4.99023	1.00646e-06	4.00347e-05	Unigene024159	1.33596	1.4101e-09	6.91374e-08	Unigene020273	2.10159	0.000298898	0.00641492
Unigene031152	2.25681	1.01996e-06	4.04782e-05	Unigene016830	-1.57818	1.42755e-09	6.98312e-08	Unigene039501	-1.89271	0.000303562	0.00648675
Unigene017107	-5.24202	1.03946e-06	4.1157e-05	Unigene024251	-4.97123	1.46336e-09	7.14182e-08	Unigene040167	1.27906	0.000306637	0.00653827
Unigene027239	1.12466	1.05958e-06	4.1857e-05	Unigene014152	-9.31778	1.46941e-09	7.15487e-08	Unigene029059	1.14033	0.000308932	0.00657299
Unigene014100	-7.58399	1.07151e-06	4.21067e-05	Unigene022495	-3.44765	1.49672e-09	7.27113e-08	Unigene042965	-1.99056	0.000316359	0.0067165
Unigene028591	1.58105	1.07226e-06	4.21067e-05	Unigene033750	1.78604	1.53706e-09	7.45001e-08	Unigene022563	1.06716	0.000333385	0.00706275
Unigene036485	-1.58483	1.07325e-06	4.21067e-05	Unigene020604	2.82256	1.58708e-09	7.67489e-08	Unigene016089	1.01702	0.000339858	0.00718442
Unigene025772	-1.11204	1.08564e-06	4.24956e-05	Unigene039720	6.33762	1.6073e-09	7.73734e-08	Unigene044731	-1.12804	0.000349383	0.00736996
Unigene045780	-4.14363	1.09264e-06	4.26725e-05	Unigene040474	1.0705	1.60465e-09	7.73734e-08	Unigene014882	1.2968	0.000355037	0.00747324
Unigene027108	-3.48587	1.09547e-06	4.26861e-05	Unigene021135	-1.95353	1.62305e-09	7.79541e-08	Unigene013772	-1.97953	0.000355898	0.00747538
Unigene020323	-1.14015	1.14821e-06	4.46401e-05	Unigene020891	-6.26167	1.77276e-09	8.4952e-08	Unigene038042	-2.3832	0.000366698	0.00768584
Unigene025566	2.24124	1.17057e-06	4.54065e-05	Unigene028302	1.38745	1.82391e-09	8.72061e-08	Unigene043590	-1.96744	0.000369114	0.00772005
Unigene008246	-5.20353	1.19688e-06	4.62182e-05	Unigene037335	1.4166	1.94275e-09	9.26788e-08	Unigene028857	-1.32482	0.000370062	0.00772348
Unigene035328	-5.20353	1.19688e-06	4.62182e-05	Unigene029275	-9.28182	1.99555e-09	9.49838e-08	Unigene014317	-1.2162	0.00037795	0.00787143
Unigene022766	1.60842	1.20726e-06	4.65148e-05	Unigene022323	-2.71051	2.03932e-09	9.68494e-08	Unigene018246	-3.07494	0.000386669	0.00803603
Unigene027412	1.06526	1.2241e-06	4.70418e-05	Unigene037597	-1.1181	2.16661e-09	1.02664e-07	Unigene017088	-2.52346	0.00039469	0.00816825
Unigene035326	-2.68268	1.22642e-06	4.70418e-05	Unigene030035	-3.0696	2.18773e-09	1.03434e-07	Unigene037245	-1.41653	0.000405002	0.0083641
Unigene019049	1.68002	1.23276e-06	4.71798e-05	Unigene014715	-2.03919	2.19409e-09	1.03503e-07	Unigene030558	-1.48444	0.000407089	0.00838962
Unigene027552	1.40783	1.25049e-06	4.7646e-05	Unigene039501	-2.90623	2.27559e-09	1.0711e-07	Unigene029647	-1.59217	0.000417736	0.00855533
Unigene036067	1.20026	1.24891e-06	4.7646e-05	Unigene034093	-9.18332	2.37413e-09	1.115e-07	Unigene016507	-1.88974	0.000420133	0.00858658
Unigene030035	-2.24703	1.29353e-06	4.90999e-05	Unigene025051	1.42425	2.45806e-09	1.15186e-07	Unigene018934	-1.11075	0.000425749	0.00868334
Unigene044303	6.82592	1.29436e-06	4.90999e-05	Unigene028804	-1.50016	2.53717e-09	1.18631e-07	Unigene030329	-1.41294	0.000429631	0.00874442
Unigene023950	-5.2345	1.38695e-06	5.24964e-05	Unigene029452	-3.39902	2.60469e-09	1.21327e-07	Unigene039065	-1.18831	0.000431948	0.00877344
Unigene023750	2.00965	1.41528e-06	5.3451e-05	Unigene029977	2.03786	2.60629e-09	1.21327e-07	Unigene036707	-1.44615	0.000454504	0.00917483
Unigene031626	1.577	1.45422e-06	5.4801e-05	Unigene045210	1.80701	2.89693e-09	1.34561e-07	Unigene036932	1.01768	0.000453717	0.00917483
Unigene019191	1.51582	1.46553e-06	5.51065e-05	Unigene019559	4.43953	2.9744e-09	1.37556e-07	Unigene043722	1.11448	0.000457659	0.00921964
Unigene029428	1.79858	1.47153e-06	5.52111e-05	Unigene042464	1.27166	2.97282e-09	1.37556e-07	Unigene045961	-1.78965	0.000459914	0.00923738
Unigene035559	1.857	1.48397e-06	5.55567e-05	Unigene033641	1.23186	3.0411e-09	1.40334e-07	Unigene046973	-1.38575	0.000471128	0.0094331
Unigene022762	-1.29907	1.49841e-06	5.58541e-05	Unigene035830	-2.73977	3.13421e-09	1.44004e-07	Unigene020512	2.1302	0.000476675	0.00948632
Unigene038460	1.5173	1.49815e-06	5.58541e-05	Unigene040380	1.2507	3.12938e-09	1.44004e-07	Unigene058136	-1.0931	0.000476027	0.00948632
Unigene034624	1.78889	1.51657e-06	5.64085e-05	Unigene030875	-8.19777	3.27364e-09	1.50084e-07	Unigene021359	-3.93217	0.000490074	0.00971373
Unigene019325	1.20583	1.54823e-06	5.74619e-05	Unigene038440	-3.46824	3.34479e-09	1.53015e-07	Unigene037829	-1.60076	0.000489602	0.00971373
Unigene020674	-4.48419	1.64776e-06	6.1024e-05	Unigene018796	2.885	3.38912e-09	1.54709e-07	Unigene023889	1.22957	0.000492501	0.00973144
Unigene037214	1.31595	1.6712e-06	6.1759e-05	Unigene026544	5.40802	3.62012e-09	1.64898e-07	Unigene044353	-1.53257	0.000492944	0.00973144
Unigene023508	-2.15072	1.78194e-06	6.57101e-05	Unigene008020	-4.8235	3.63803e-09	1.65359e-07	Unigene032886	-1.81261	0.000494734	0.00974725
Unigene017612	-1.72264	1.78994e-06	6.57908e-05	Unigene047622	-3.04639	3.77277e-09	1.71116e-07	Unigene044594	1.40997	0.000498617	0.00980415
Unigene020196	1.75911	1.79179e-06	6.57908e-05	Unigene044731	-1.76199	3.79404e-09	1.71713e-07
Unigene030612	-2.65755	1.81139e-06	6.60467e-05	Unigene020323	-1.0612	3.8556e-09	1.74127e-07
Unigene032280	-2.79181	1.80886e-06	6.60467e-05	Unigene032876	-1.8982	3.87029e-09	1.74418e-07
Unigene037567	-4.46622	1.80949e-06	6.60467e-05	Unigene044363	1.2701	3.90841e-09	1.75762e-07
Unigene045303	2.10409	1.81413e-06	6.60467e-05	Unigene045911	5.36482	3.91824e-09	1.75831e-07
Unigene037882	-2.63093	1.977e-06	7.1824e-05	Unigene033948	3.30145	3.96437e-09	1.77525e-07
Unigene042824	-4.05912	1.98886e-06	7.2028e-05	Unigene030751	-3.9875	3.97419e-09	1.77589e-07
Unigene047115	-1.60137	1.991e-06	7.2028e-05	Unigene042936	-2.71559	4.20173e-09	1.87362e-07
Unigene020698	1.62997	1.99603e-06	7.20582e-05	Unigene024498	2.83609	4.55342e-09	2.0177e-07
Unigene035838	2.11285	2.02247e-06	7.286e-05	Unigene025790	-8.11596	4.5492e-09	2.0177e-07
Unigene024309	-2.19425	2.14014e-06	7.69376e-05	Unigene018177	1.25845	4.70716e-09	2.08147e-07
Unigene029094	1.64519	2.17586e-06	7.80583e-05	Unigene026214	1.51615	4.99166e-09	2.20267e-07
Unigene028400	-6.5802	2.19839e-06	7.87022e-05	Unigene040385	1.17662	5.01193e-09	2.20702e-07
Unigene033608	2.42893	2.28695e-06	8.17025e-05	Unigene021561	-5.36474	5.15904e-09	2.26709e-07
Unigene036028	1.94502	2.31002e-06	8.23557e-05	Unigene015785	2.48689	5.45795e-09	2.39347e-07
Unigene023213	1.13503	2.45254e-06	8.72556e-05	Unigene031184	1.33575	5.57248e-09	2.43865e-07
Unigene018618	-1.56531	2.49004e-06	8.82662e-05	Unigene024781	1.35828	5.64125e-09	2.46365e-07
Unigene025960	1.78984	2.49122e-06	8.82662e-05	Unigene017148	4.45038	5.69036e-09	2.47561e-07
Unigene041682	-3.27941	2.54309e-06	8.99185e-05	Unigene021958	1.51038	5.69199e-09	2.47561e-07
Unigene046734	2.17282	2.60589e-06	9.19501e-05	Unigene014406	-8.95774	6.05276e-09	2.62712e-07
Unigene026897	-4.39891	2.63691e-06	9.28538e-05	Unigene014743	3.04306	6.09653e-09	2.64071e-07
Unigene023248	-4.00674	2.70086e-06	9.49112e-05	Unigene022550	-4.40344	6.20602e-09	2.68265e-07
Unigene038859	-2.81463	2.72658e-06	9.54248e-05	Unigene019702	1.30592	6.28471e-09	2.70913e-07
Unigene037235	1.1951	2.75632e-06	9.62694e-05	Unigene036115	8.98839	6.29286e-09	2.70913e-07
Unigene023636	1.19503	2.78575e-06	9.69036e-05	Unigene040156	2.48815	6.6845e-09	2.8719e-07
Unigene052394	4.73067	2.78168e-06	9.69036e-05	Unigene042967	-4.72139	6.81447e-09	2.92181e-07
Unigene032799	-1.12987	2.87338e-06	9.97497e-05	Unigene035925	-3.93475	6.95975e-09	2.97807e-07
Unigene038489	2.43472	3.03284e-06	0.000105073	Unigene018547	-3.19438	6.97464e-09	2.97842e-07
Unigene021106	-1.08301	3.05861e-06	0.000105753	Unigene026097	-2.14293	6.9904e-09	2.97915e-07
Unigene037512	-4.00889	3.09968e-06	0.000106958	Unigene036896	-7.99416	7.31147e-09	3.10972e-07
Unigene036983	3.81971	3.11858e-06	0.000107394	Unigene030164	1.19509	7.54568e-09	3.20291e-07
Unigene015655	1.35798	3.14623e-06	0.00010813	Unigene017948	-3.27915	7.94889e-09	3.36015e-07
Unigene027242	2.41705	3.18238e-06	0.000109154	Unigene026415	1.51257	7.96371e-09	3.36015e-07
Unigene022453	-3.98464	3.25457e-06	0.000111408	Unigene023961	1.79834	9.35605e-09	3.93977e-07
Unigene045336	1.94765	3.27506e-06	0.000111886	Unigene027406	-1.85224	9.38647e-09	3.94474e-07
Unigene044881	1.73872	3.2851e-06	0.000112006	Unigene014168	-4.69905	9.75952e-09	4.0934e-07
Unigene027773	-1.83449	3.31799e-06	0.000112904	Unigene023889	2.29604	9.86104e-09	4.1278e-07
Unigene015590	2.64071	3.43024e-06	0.000116493	Unigene030466	-5.17027	1.05777e-08	4.41908e-07
Unigene045002	-1.43298	3.46159e-06	0.000117326	Unigene031771	-5.98587	1.07848e-08	4.4967e-07
Unigene031338	-1.3755	3.52444e-06	0.00011922	Unigene023135	-2.55855	1.09958e-08	4.56672e-07
Unigene023869	-4.98589	3.56682e-06	0.000120417	Unigene030612	-4.33918	1.09798e-08	4.56672e-07
Unigene045412	-1.20614	3.59366e-06	0.000121085	Unigene029274	-8.84043	1.11408e-08	4.61787e-07
Unigene029325	-2.43043	3.61548e-06	0.000121582	Unigene029765	1.22796	1.14785e-08	4.74855e-07
Unigene033276	1.4655	3.65951e-06	0.000122822	Unigene027401	2.32358	1.22327e-08	5.05069e-07
Unigene036115	7.27839	3.69232e-06	0.000123682	Unigene027993	-4.32779	1.22747e-08	5.05818e-07
Unigene028385	1.48731	3.70315e-06	0.000123803	Unigene025715	-8.75823	1.30512e-08	5.36773e-07
Unigene042366	2.83885	3.73797e-06	0.000124725	Unigene020069	1.35163	1.31521e-08	5.39875e-07
Unigene027534	1.38655	3.76844e-06	0.000125498	Unigene013737	3.59605	1.33258e-08	5.45947e-07
Unigene031239	3.40927	3.81854e-06	0.00012692	Unigene030026	-7.85119	1.34195e-08	5.48723e-07
Unigene018981	1.40388	3.93489e-06	0.000130535	Unigene019311	-2.88229	1.41979e-08	5.79435e-07
Unigene023287	1.67884	4.04621e-06	0.000133969	Unigene029404	1.36765	1.42727e-08	5.81366e-07
Unigene019979	1.87829	4.08962e-06	0.000135146	Unigene033102	-1.26384	1.44555e-08	5.8768e-07
Unigene027993	-2.48395	4.34146e-06	0.000143193	Unigene036330	1.52932	1.59857e-08	6.48645e-07
Unigene039818	1.92332	4.40532e-06	0.000145021	Unigene032945	3.45442	1.63407e-08	6.61782e-07
Unigene021039	-4.33089	4.55279e-06	0.000149589	Unigene020378	-1.22946	1.64627e-08	6.65085e-07
Unigene038022	-6.36416	4.68406e-06	0.000153609	Unigene029942	1.808	1.72398e-08	6.94214e-07
Unigene013365	-1.89511	4.76979e-06	0.000156122	Unigene033277	-7.78402	1.73401e-08	6.96928e-07
Unigene026504	-2.57727	4.82145e-06	0.000157513	Unigene029085	-4.34593	1.80125e-08	7.22583e-07
Unigene030559	1.62691	4.96923e-06	0.000162033	Unigene059398	3.07291	1.81269e-08	7.25795e-07
Unigene038198	-4.91684	5.04096e-06	0.00016406	Unigene022734	1.51883	1.83988e-08	7.33909e-07
Unigene043002	-2.16865	5.26039e-06	0.000170878	Unigene039459	-2.07621	1.88085e-08	7.48838e-07
Unigene033989	1.26986	5.40597e-06	0.000175276	Unigene028400	-8.65125	1.97963e-08	7.86688e-07
Unigene013668	-4.91786	5.54204e-06	0.000179208	Unigene023134	-3.06111	1.98525e-08	7.87447e-07
Unigene022117	5.68676	5.54812e-06	0.000179208	Unigene032195	2.02484	2.12838e-08	8.42638e-07
Unigene021135	-1.56767	5.64877e-06	0.000182117	Unigene021599	1.48299	2.21465e-08	8.75159e-07
Unigene039067	2.67493	5.73852e-06	0.000184664	Unigene023148	-7.74453	2.22136e-08	8.76174e-07
Unigene014458	-2.05421	5.82582e-06	0.000187123	Unigene021326	2.03491	2.23575e-08	8.80213e-07
Unigene014421	1.46411	6.05176e-06	0.000194018	Unigene027412	1.04105	2.30794e-08	9.06947e-07
Unigene013929	-2.15185	6.12461e-06	0.000195988	Unigene044303	8.02879	2.36167e-08	9.26344e-07
Unigene027339	-4.25989	6.16431e-06	0.000196891	Unigene029325	-3.45871	2.4291e-08	9.51031e-07
Unigene026317	-3.03962	6.23592e-06	0.000198809	Unigene021996	1.18019	2.50304e-08	9.78173e-07
Unigene024310	-2.99061	6.40248e-06	0.000203741	Unigene017882	2.22274	2.51191e-08	9.79829e-07
Unigene015314	-2.86222	6.51703e-06	0.000207003	Unigene035106	2.81503	2.52689e-08	9.83863e-07
Unigene041848	-1.83545	6.72711e-06	0.000212889	Unigene024026	1.80005	2.53946e-08	9.86943e-07
Unigene026954	-6.24663	6.84882e-06	0.00021595	Unigene031634	-2.29231	2.64317e-08	1.02537e-06
Unigene036668	1.2477	6.84897e-06	0.00021595	Unigene041709	1.02468	2.72751e-08	1.05615e-06
Unigene042155	1.37365	6.86411e-06	0.000216031	Unigene014815	-8.5707	2.78317e-08	1.07573e-06
Unigene043151	-1.04586	6.91385e-06	0.000217199	Unigene038539	-1.31448	2.81342e-08	1.08545e-06
Unigene029119	1.55324	6.96288e-06	0.00021834	Unigene038085	1.5097	2.81971e-08	1.0859e-06
Unigene029453	2.02819	7.00938e-06	0.000219397	Unigene020354	1.4326	2.83466e-08	1.08967e-06
Unigene020362	-6.98343	7.33965e-06	0.000229317	Unigene022057	1.49647	2.84294e-08	1.09088e-06
Unigene012221	1.50488	7.37545e-06	0.000229944	Unigene019618	-5.81424	3.02249e-08	1.15767e-06
Unigene047622	-2.11061	7.38647e-06	0.000229944	Unigene026045	-3.98374	3.19651e-08	1.22212e-06
Unigene046184	-3.25552	7.41025e-06	0.000230267	Unigene049651	4.13013	3.23527e-08	1.23471e-06
Unigene019621	-3.10229	7.83403e-06	0.000242996	Unigene014099	-7.63361	3.26559e-08	1.24404e-06
Unigene027401	1.96822	8.00193e-06	0.000247757	Unigene026016	-5.79625	3.30651e-08	1.25737e-06
Unigene017502	3.4563	8.05722e-06	0.00024902	Unigene036071	1.65591	3.33419e-08	1.26562e-06
Unigene039416	-1.62955	8.1925e-06	0.000252747	Unigene048286	2.94996	3.36219e-08	1.27396e-06
Unigene008020	-2.27145	8.28769e-06	0.000255225	Unigene036485	-1.60421	3.39067e-08	1.28246e-06
Unigene031962	1.28242	8.34397e-06	0.000256499	Unigene024075	2.13729	3.52538e-08	1.32867e-06
Unigene020892	-4.20298	8.42561e-06	0.000258085	Unigene024592	1.38505	3.52095e-08	1.32867e-06
Unigene024856	-2.69525	8.41679e-06	0.000258085	Unigene040430	-1.70912	3.55161e-08	1.33618e-06
Unigene032577	1.29963	8.69035e-06	0.000265721	Unigene011754	-7.62115	3.59704e-08	1.35087e-06
Unigene022092	-4.78624	9.08107e-06	0.000276336	Unigene021252	1.03157	3.66266e-08	1.37308e-06
Unigene027725	-1.79824	9.08578e-06	0.000276336	Unigene048288	3.98304	3.71709e-08	1.39102e-06
Unigene032898	-1.36027	9.07185e-06	0.000276336	Unigene015421	3.14259	3.74031e-08	1.39724e-06
Unigene039779	1.36383	9.27425e-06	0.00028157	Unigene021729	1.39227	3.84562e-08	1.43405e-06
Unigene043058	-3.35731	9.3963e-06	0.000284772	Unigene021254	2.62294	3.8589e-08	1.43647e-06
Unigene039069	1.89627	9.47026e-06	0.000286509	Unigene027224	1.54324	3.86884e-08	1.437e-06
Unigene024438	1.22482	9.76565e-06	0.000294926	Unigene034145	1.27136	3.87388e-08	1.437e-06
Unigene018762	1.38498	9.86732e-06	0.000296953	Unigene024296	-4.53762	3.95582e-08	1.46483e-06
Unigene035749	-2.83306	9.8555e-06	0.000296953	Unigene033432	2.95095	4.23029e-08	1.56373e-06
Unigene035498	1.96335	9.93085e-06	0.000298342	Unigene020199	-2.5898	4.24633e-08	1.56692e-06
Unigene016642	-3.40021	1.0076e-05	0.000302175	Unigene000755	-8.4519	4.31993e-08	1.59131e-06
Unigene023239	1.57151	1.01075e-05	0.00030259	Unigene036860	1.41941	4.4146e-08	1.62336e-06
Unigene023749	1.90321	1.07444e-05	0.00032054	Unigene034684	-4.97819	4.4394e-08	1.62965e-06
Unigene041876	1.63677	1.07277e-05	0.00032054	Unigene015255	2.8054	4.45331e-08	1.63193e-06
Unigene012161	-6.85189	1.08499e-05	0.000323035	Unigene047115	-1.72225	4.48669e-08	1.64132e-06
Unigene018246	-1.81996	1.08656e-05	0.000323035	Unigene042348	-7.55167	4.55127e-08	1.66208e-06
Unigene017930	-2.29462	1.09073e-05	0.000323716	Unigene022392	2.47451	4.59329e-08	1.67454e-06
Unigene037888	1.65169	1.09818e-05	0.000325363	Unigene035039	1.67195	4.65526e-08	1.69421e-06
Unigene025808	-1.79507	1.11267e-05	0.000329091	Unigene039818	2.12975	4.81363e-08	1.74884e-06
Unigene022246	1.31798	1.17351e-05	0.000346487	Unigene011448	1.59132	4.991e-08	1.80708e-06
Unigene027939	-6.81762	1.20787e-05	0.000355929	Unigene039413	2.02436	4.98792e-08	1.80708e-06
Unigene039965	-4.12471	1.20963e-05	0.000355929	Unigene038086	-2.92085	5.09662e-08	1.84217e-06
Unigene039720	4.78137	1.24668e-05	0.000366205	Unigene038022	-8.41246	5.15745e-08	1.86099e-06
Unigene018547	-1.99794	1.25706e-05	0.000368401	Unigene040481	1.36107	5.18841e-08	1.86898e-06
Unigene028302	1.18601	1.25845e-05	0.000368401	Unigene013563	-8.42051	5.25439e-08	1.88953e-06
Unigene048335	2.15441	1.26361e-05	0.000369283	Unigene024772	-4.48222	5.27562e-08	1.89395e-06
Unigene026157	-1.33463	1.27648e-05	0.000372412	Unigene041848	-2.25031	5.28577e-08	1.89438e-06
Unigene016297	-3.16269	1.28155e-05	0.000373256	Unigene053158	-8.41079	5.34629e-08	1.91283e-06
Unigene032825	1.34958	1.30762e-05	0.000379564	Unigene024784	-1.40557	5.42856e-08	1.93573e-06
Unigene044479	-1.97364	1.30722e-05	0.000379564	Unigene038713	-7.52475	5.42659e-08	1.93573e-06
Unigene018714	-4.70513	1.31699e-05	0.000381638	Unigene040297	-1.47631	5.58383e-08	1.98775e-06
Unigene026857	-3.75611	1.31928e-05	0.000381659	Unigene038610	-1.22089	5.75623e-08	2.04568e-06
Unigene003253	-6.78142	1.33693e-05	0.000386114	Unigene024275	-5.71681	5.83458e-08	2.07005e-06
Unigene019575	1.43787	1.34004e-05	0.000386364	Unigene020083	-3.73244	5.91566e-08	2.09531e-06
Unigene016948	1.64693	1.34551e-05	0.000387131	Unigene036507	1.20637	6.24292e-08	2.20753e-06
Unigene045125	2.57379	1.34721e-05	0.000387131	Unigene023430	1.5887	6.30842e-08	2.22698e-06
Unigene046735	2.3031	1.37577e-05	0.000394678	Unigene015800	-2.06039	6.47497e-08	2.28197e-06
Unigene020717	-4.71374	1.39905e-05	0.000400688	Unigene020893	-5.71293	6.56191e-08	2.30877e-06
Unigene046049	-2.50513	1.41241e-05	0.000403842	Unigene037462	-3.46232	6.61768e-08	2.32453e-06
Unigene033102	-1.08528	1.44207e-05	0.000411635	Unigene025370	-8.35823	6.67118e-08	2.33944e-06
Unigene026452	-1.1993	1.44609e-05	0.000412099	Unigene033820	1.48906	6.9411e-08	2.43007e-06
Unigene041232	2.62253	1.4645e-05	0.000416655	Unigene024860	-1.50428	7.01598e-08	2.45224e-06
Unigene018481	-6.73789	1.48032e-05	0.000420413	Unigene036934	1.69738	7.19773e-08	2.51161e-06
Unigene025739	-2.91543	1.4826e-05	0.000420413	Unigene017899	1.64467	7.24106e-08	2.52258e-06
Unigene027624	1.16102	1.4931e-05	0.000421998	Unigene024695	2.21064	7.46345e-08	2.59461e-06
Unigene035735	1.20268	1.4915e-05	0.000421998	Unigene028171	2.29806	7.48456e-08	2.59461e-06
Unigene015862	-6.73915	1.49944e-05	0.000423094	Unigene034271	-3.55185	7.47434e-08	2.59461e-06
Unigene043874	1.66795	1.50864e-05	0.000424348	Unigene013362	3.80498	7.50905e-08	2.59884e-06
Unigene044274	-1.59918	1.55662e-05	0.000437074	Unigene027905	-5.69265	7.53731e-08	2.60437e-06
Unigene026255	1.22407	1.5622e-05	0.000437597	Unigene030378	-1.71708	7.57768e-08	2.61405e-06
Unigene032810	-1.97682	1.56357e-05	0.000437597	Unigene037596	-1.68222	7.91885e-08	2.7273e-06
Unigene017525	2.06821	1.56916e-05	0.000438422	Unigene016121	5.71492	8.07835e-08	2.77772e-06
Unigene029085	-2.33396	1.57418e-05	0.000438422	Unigene011159	4.65246	8.1229e-08	2.78851e-06
Unigene048372	-1.19085	1.57288e-05	0.000438422	Unigene019804	4.52504	8.30864e-08	2.84766e-06
Unigene033639	-2.45217	1.58853e-05	0.000441705	Unigene021598	5.81456	8.35582e-08	2.8592e-06
Unigene039346	1.48972	1.62473e-05	0.00045104	Unigene029773	-3.4385	8.56777e-08	2.927e-06
Unigene048021	2.2185	1.70094e-05	0.000471435	Unigene038859	-4.10956	9.09552e-08	3.10229e-06
Unigene020373	1.74572	1.77095e-05	0.000490048	Unigene046982	1.72482	9.26283e-08	3.15428e-06
Unigene019400	1.23514	1.81057e-05	0.000500207	Unigene024990	-2.33054	9.38929e-08	3.19221e-06
Unigene022703	1.66165	1.81847e-05	0.000501583	Unigene036028	1.9967	9.89388e-08	3.35503e-06
Unigene036798	1.17556	1.83624e-05	0.000505673	Unigene045336	2.08159	9.89987e-08	3.35503e-06
Unigene039563	1.1553	1.85023e-05	0.000508711	Unigene032280	-4.85292	1.02164e-07	3.45124e-06
Unigene015614	2.29812	1.88176e-05	0.000516551	Unigene017449	-3.70044	1.04301e-07	3.51785e-06
Unigene015713	-1.10513	1.9466e-05	0.000533275	Unigene031626	1.56381	1.05412e-07	3.54966e-06
Unigene033058	-1.55944	1.94889e-05	0.000533275	Unigene027403	1.19803	1.09282e-07	3.67414e-06
Unigene031282	2.86675	2.11033e-05	0.000576532	Unigene036791	-5.60602	1.09765e-07	3.68452e-06
Unigene034110	2.21247	2.11756e-05	0.000577589	Unigene024950	-7.32856	1.10543e-07	3.70476e-06
Unigene035738	1.04765	2.17385e-05	0.000592004	Unigene011873	3.74977	1.12247e-07	3.75594e-06
Unigene046262	-2.77291	2.1975e-05	0.000597497	Unigene044388	1.7225	1.14512e-07	3.82569e-06
Unigene045210	1.45116	2.21345e-05	0.000600883	Unigene036372	-2.35116	1.155e-07	3.8526e-06
Unigene022993	2.65	2.24818e-05	0.00060935	Unigene037331	1.82955	1.15835e-07	3.85772e-06
Unigene040032	4.64221	2.26301e-05	0.000612404	Unigene031561	1.14955	1.18494e-07	3.94007e-06
Unigene042187	-4.57763	2.27538e-05	0.000614781	Unigene035411	5.63985	1.23339e-07	4.09475e-06
Unigene019242	-1.99391	2.27966e-05	0.000614971	Unigene035472	1.28449	1.26325e-07	4.1873e-06
Unigene021047	1.08711	2.29888e-05	0.000619185	Unigene029650	1.12888	1.29196e-07	4.2758e-06
Unigene021598	4.64352	2.30369e-05	0.000619508	Unigene033699	1.10973	1.34819e-07	4.4549e-06
Unigene031276	1.92625	2.33281e-05	0.00062636	Unigene027155	-8.13941	1.40226e-07	4.62636e-06
Unigene019164	-1.00329	2.33783e-05	0.000626727	Unigene029190	1.62187	1.42158e-07	4.68281e-06
Unigene035002	-2.32412	2.41405e-05	0.000646154	Unigene021855	-4.82892	1.45677e-07	4.79129e-06
Unigene018097	1.07727	2.43807e-05	0.000651567	Unigene009932	1.10526	1.49528e-07	4.91031e-06
Unigene019911	-3.6356	2.46541e-05	0.000656999	Unigene021756	-7.23754	1.58889e-07	5.20965e-06
Unigene030908	-1.29647	2.46604e-05	0.000656999	Unigene039063	-3.80622	1.62686e-07	5.3259e-06
Unigene039855	2.26474	2.47007e-05	0.000657055	Unigene016872	1.50035	1.62994e-07	5.32775e-06
Unigene013772	2.36558	2.5017e-05	0.000664439	Unigene036804	-2.10325	1.64811e-07	5.37883e-06
Unigene042442	1.05024	2.53772e-05	0.000672966	Unigene029455	-3.23978	1.6538e-07	5.3891e-06
Unigene014814	-6.55391	2.54726e-05	0.000674455	Unigene018567	1.42587	1.66203e-07	5.40055e-06
Unigene022978	1.85091	2.58352e-05	0.000683004	Unigene043835	3.72225	1.66241e-07	5.40055e-06
Unigene012814	-6.54669	2.66618e-05	0.000703773	Unigene043070	3.7256	1.67603e-07	5.43644e-06
Unigene029951	-2.5984	2.67697e-05	0.000705538	Unigene026429	3.93271	1.70237e-07	5.51345e-06
Unigene026009	1.02513	2.68494e-05	0.000706554	Unigene015834	2.09736	1.74622e-07	5.64684e-06
Unigene027496	1.80401	2.6934e-05	0.000707698	Unigene043507	2.26043	1.76967e-07	5.71392e-06
Unigene022772	1.64822	2.698e-05	0.000707824	Unigene040157	2.78624	1.80174e-07	5.80862e-06
Unigene041680	-2.82599	2.70926e-05	0.000709695	Unigene056313	2.78765	1.90798e-07	6.14178e-06
Unigene030290	-3.19941	2.7404e-05	0.000716759	Unigene007768	-5.50676	1.95261e-07	6.27592e-06
Unigene015687	-4.53251	2.75576e-05	0.000719681	Unigene033370	1.26964	1.95699e-07	6.28045e-06
Unigene030670	2.16169	2.85035e-05	0.000742127	Unigene022993	3.19765	2.00968e-07	6.43978e-06
Unigene033218	-2.81761	2.86875e-05	0.000745788	Unigene017107	-8.05103	2.02681e-07	6.48486e-06
Unigene046432	-1.18205	2.91927e-05	0.000757776	Unigene038199	-8.02512	2.07893e-07	6.64159e-06
Unigene041739	1.11417	2.98785e-05	0.000774407	Unigene047071	3.03175	2.102e-07	6.70519e-06
Unigene036301	-1.06249	3.02861e-05	0.000783733	Unigene011099	-4.45452	2.15069e-07	6.8502e-06
Unigene038085	1.28081	3.03295e-05	0.000783733	Unigene008246	-8.01084	2.17347e-07	6.90199e-06
Unigene030365	-2.8157	3.03811e-05	0.000783887	Unigene035328	-8.01084	2.17347e-07	6.90199e-06
Unigene038496	1.62078	3.09386e-05	0.000797076	Unigene035153	2.20678	2.18386e-07	6.91426e-06
Unigene037247	-3.93852	3.14485e-05	0.000808998	Unigene025502	2.51538	2.22688e-07	7.03992e-06
Unigene023430	1.36256	3.18733e-05	0.000818699	Unigene047460	3.38801	2.24595e-07	7.08963e-06
Unigene047487	-2.71826	3.22635e-05	0.000827488	Unigene024715	-4.00153	2.27165e-07	7.1601e-06
Unigene043237	2.19085	3.26146e-05	0.000835245	Unigene043150	-1.77264	2.31881e-07	7.29789e-06
Unigene022688	1.9195	3.30665e-05	0.000845558	Unigene020226	2.30747	2.33496e-07	7.33781e-06
Unigene043902	1.50078	3.366e-05	0.000858179	Unigene035905	1.32828	2.37703e-07	7.45894e-06
Unigene021311	-4.48536	3.37121e-05	0.000858234	Unigene014963	-1.40006	2.47164e-07	7.74434e-06
Unigene025170	-5.74391	3.40297e-05	0.000865039	Unigene029392	2.92451	2.52332e-07	7.89461e-06
Unigene016226	-3.92395	3.41455e-05	0.000866701	Unigene043624	-1.0987	2.55293e-07	7.97546e-06
Unigene026859	1.55736	3.4369e-05	0.000871086	Unigene022765	2.64835	2.58116e-07	8.05177e-06
Unigene017844	-3.15574	3.54955e-05	0.000898314	Unigene024631	-4.02294	2.62118e-07	8.16458e-06
Unigene021862	-1.32542	3.56641e-05	0.000901252	Unigene027937	2.7355	2.74076e-07	8.52452e-06
Unigene034727	2.27327	3.57383e-05	0.000901803	Unigene034250	2.82788	2.8169e-07	8.74848e-06
Unigene033430	1.02274	3.58062e-05	0.00090219	Unigene026810	-2.44431	2.83761e-07	8.79992e-06
Unigene008407	3.40631	3.6063e-05	0.00090733	Unigene016580	-7.96912	2.8547e-07	8.83997e-06
Unigene024715	-2.3797	3.6312e-05	0.00091226	Unigene024919	1.52675	2.9168e-07	9.0191e-06
Unigene041275	2.36986	3.69838e-05	0.000926429	Unigene022226	-2.05679	2.99489e-07	9.24706e-06
Unigene028210	-4.46217	3.70536e-05	0.000926824	Unigene035987	4.05059	3.29036e-07	1.01446e-05
Unigene033434	-2.778	3.75694e-05	0.000938361	Unigene042366	3.06609	3.32711e-07	1.0243e-05
Unigene044589	-2.28964	3.78181e-05	0.000943203	Unigene022665	-7.90957	3.37549e-07	1.03768e-05
Unigene024115	-2.09634	3.88297e-05	0.000967027	Unigene027331	1.1445	3.39378e-07	1.04179e-05
Unigene020544	1.59578	3.89972e-05	0.000969795	Unigene041410	1.28487	3.47951e-07	1.06656e-05
Unigene011615	-6.41288	3.928e-05	0.000974007	Unigene021596	-2.49126	3.51297e-07	1.07526e-05
Unigene029272	-6.41288	3.928e-05	0.000974007	Unigene034872	-1.83076	3.59286e-07	1.09655e-05
Unigene020965	-1.71116	4.10369e-05	0.00101611	Unigene042923	2.69154	3.59276e-07	1.09655e-05
Unigene024614	-1.75215	4.14449e-05	0.00102473	Unigene015061	2.67849	3.60271e-07	1.09797e-05
Unigene018281	-2.99555	4.20162e-05	0.00103736	Unigene043237	2.50927	3.68908e-07	1.12268e-05
Unigene022045	1.887	4.33313e-05	0.0010683	Unigene058625	5.44217	3.94587e-07	1.1991e-05
Unigene041552	-2.60851	4.38217e-05	0.00107884	Unigene035174	2.31096	4.00648e-07	1.21578e-05
Unigene039026	1.36954	4.42064e-05	0.00108676	Unigene046104	2.14348	4.01372e-07	1.21623e-05
Unigene023459	-2.96788	4.4765e-05	0.00109892	Unigene025641	2.62035	4.02901e-07	1.21912e-05
Unigene028225	1.65539	4.49061e-05	0.00110081	Unigene011158	5.45876	4.06467e-07	1.22816e-05
Unigene038440	-1.8372	4.4975e-05	0.00110093	Unigene043012	-1.58261	4.10158e-07	1.23754e-05
Unigene032413	1.86209	4.53377e-05	0.00110823	Unigene016026	-7.85143	4.38424e-07	1.31907e-05
Unigene020556	-3.15013	4.5673e-05	0.00111484	Unigene020273	4.43925	4.38218e-07	1.31907e-05
Unigene032358	-2.87808	4.59403e-05	0.00111977	Unigene033907	1.49893	4.456e-07	1.33876e-05
Unigene021880	1.88643	4.61739e-05	0.00112228	Unigene033329	2.71766	4.47228e-07	1.34175e-05
Unigene014316	1.58012	4.63911e-05	0.00112597	Unigene028802	3.46793	4.51748e-07	1.35339e-05
Unigene039594	-1.68781	4.6515e-05	0.00112738	Unigene037214	1.20697	4.57662e-07	1.36917e-05
Unigene031996	1.18409	4.71978e-05	0.00114232	Unigene034323	2.19637	4.62494e-07	1.38168e-05
Unigene024661	1.13403	4.7542e-05	0.00114742	Unigene032313	2.2558	4.66133e-07	1.39059e-05
Unigene038361	1.20862	4.75216e-05	0.00114742	Unigene042481	2.38897	4.72689e-07	1.40816e-05
Unigene041010	1.36656	4.76403e-05	0.00114818	Unigene024007	1.01612	4.78175e-07	1.4225e-05
Unigene021194	3.40576	4.83303e-05	0.00116318	Unigene021379	-4.70761	4.83553e-07	1.43648e-05
Unigene030318	-2.45082	4.94368e-05	0.00118814	Unigene028365	1.82283	4.87153e-07	1.44515e-05
Unigene033882	1.24237	4.95813e-05	0.00118995	Unigene028943	1.59027	4.92338e-07	1.45849e-05
Unigene024488	-1.99969	4.98759e-05	0.00119535	Unigene035749	-3.91197	4.97438e-07	1.46949e-05
Unigene022314	-2.75706	5.04222e-05	0.00120676	Unigene020674	-7.78891	5.03441e-07	1.48308e-05
Unigene048714	1.53367	5.05784e-05	0.00120882	Unigene042826	-2.12716	5.02758e-07	1.48308e-05
Unigene047803	3.09098	5.1061e-05	0.00121866	Unigene038928	-5.32882	5.06295e-07	1.48942e-05
Unigene036964	4.46451	5.11986e-05	0.00122025	Unigene023869	-7.77397	5.17004e-07	1.51671e-05
Unigene027221	2.06879	5.16084e-05	0.00122831	Unigene042511	1.42956	5.16875e-07	1.51671e-05
Unigene030507	1.13175	5.21377e-05	0.00123919	Unigene016993	1.09474	5.29195e-07	1.54605e-05
Unigene024596	-1.05039	5.30934e-05	0.00125842	Unigene021098	1.31513	5.28224e-07	1.54605e-05
Unigene025515	-1.94393	5.35752e-05	0.00126809	Unigene024310	-4.60955	5.28873e-07	1.54605e-05
Unigene027628	-1.16649	5.44034e-05	0.00128593	Unigene036176	-2.38582	5.64864e-07	1.64799e-05
Unigene037252	1.0724	5.51717e-05	0.0013023	Unigene023569	-3.23181	5.76019e-07	1.6772e-05
Unigene019155	1.18105	5.55868e-05	0.00130314	Unigene033450	-1.48359	5.76462e-07	1.6772e-05
Unigene021948	1.54108	5.55557e-05	0.00130314	Unigene033060	-1.95901	5.88998e-07	1.71133e-05
Unigene024022	-4.36079	5.53278e-05	0.00130314	Unigene019575	1.72025	6.00694e-07	1.74292e-05
Unigene026289	1.04813	5.54707e-05	0.00130314	Unigene025170	-7.73201	6.10267e-07	1.76586e-05
Unigene043827	1.35535	5.58632e-05	0.00130784	Unigene025584	-1.43965	6.10034e-07	1.76586e-05
Unigene017703	1.18407	5.59585e-05	0.00130829	Unigene036031	-1.6243	6.31055e-07	1.82352e-05
Unigene031327	1.26117	5.64823e-05	0.00131874	Unigene037991	1.72771	6.32001e-07	1.82376e-05
Unigene014882	-1.22846	5.69101e-05	0.00132333	Unigene044479	-2.26457	6.44776e-07	1.85809e-05
Unigene022020	-1.25884	5.68843e-05	0.00132333	Unigene022374	1.58972	6.55681e-07	1.88439e-05
Unigene027716	1.70221	5.68504e-05	0.00132333	Unigene043863	-3.64774	6.54859e-07	1.88439e-05
Unigene027937	2.23643	5.73722e-05	0.00133228	Unigene023506	2.57378	6.57382e-07	1.88672e-05
Unigene019387	2.96251	5.76445e-05	0.00133679	Unigene023598	2.89588	6.86251e-07	1.96691e-05
Unigene032905	1.05693	5.91341e-05	0.00136765	Unigene038198	-7.69394	6.89184e-07	1.97265e-05
Unigene041725	1.70067	5.93264e-05	0.00137025	Unigene022572	1.47904	6.97019e-07	1.99158e-05
Unigene035476	-1.23707	6.00189e-05	0.00138438	Unigene027531	-1.97746	6.97679e-07	1.99158e-05
Unigene009214	-6.23486	6.03023e-05	0.00138905	Unigene022385	1.14413	7.11348e-07	2.02787e-05
Unigene019351	-5.53814	6.18215e-05	0.00142024	Unigene049145	6.99165	7.19332e-07	2.04787e-05
Unigene024841	-4.33334	6.17919e-05	0.00142024	Unigene029887	3.44778	7.24497e-07	2.05981e-05
Unigene021659	1.29481	6.22839e-05	0.00142895	Unigene034697	-3.32232	7.558e-07	2.14593e-05
Unigene037450	1.23541	6.27249e-05	0.00143715	Unigene043342	-1.67673	7.74183e-07	2.19518e-05
Unigene015898	1.19181	6.3119e-05	0.00144426	Unigene035494	1.73738	7.7818e-07	2.20356e-05
Unigene046244	1.77744	6.37088e-05	0.00145581	Unigene017539	1.02345	8.07785e-07	2.28434e-05
Unigene025076	3.28866	6.49972e-05	0.00148328	Unigene018941	1.43171	8.36008e-07	2.361e-05
Unigene021179	-2.26938	6.53673e-05	0.00148975	Unigene032227	1.71514	8.38858e-07	2.36589e-05
Unigene018942	1.25458	6.5792e-05	0.00149744	Unigene021251	1.61776	8.64134e-07	2.42836e-05
Unigene024904	1.09146	6.58846e-05	0.00149757	Unigene035617	1.50203	8.64448e-07	2.42836e-05
Unigene015834	1.28173	6.72808e-05	0.00152728	Unigene023508	-2.11274	8.82261e-07	2.47512e-05
Unigene030326	2.37351	6.76893e-05	0.00153453	Unigene044587	-2.23334	8.8728e-07	2.48591e-05
Unigene021400	1.24731	6.97788e-05	0.00157981	Unigene021875	4.38334	8.93311e-07	2.4995e-05
Unigene031757	1.06885	7.0569e-05	0.00159425	Unigene027687	-6.78814	9.05612e-07	2.53058e-05
Unigene038737	1.11271	7.0602e-05	0.00159425	Unigene038822	1.00512	9.19496e-07	2.56429e-05
Unigene045369	-2.45901	7.0849e-05	0.00159773	Unigene039483	-6.77312	9.20097e-07	2.56429e-05
Unigene042923	2.24385	7.23074e-05	0.00162848	Unigene026795	-2.76613	9.27363e-07	2.58114e-05
Unigene027724	-3.02573	7.24632e-05	0.00162985	Unigene016509	1.44709	9.32048e-07	2.59077e-05
Unigene025286	1.60466	7.3261e-05	0.00164551	Unigene039804	-6.77196	9.45991e-07	2.62609e-05
Unigene036372	-1.61879	7.33506e-05	0.00164551	Unigene051719	2.63855	9.51857e-07	2.63891e-05
Unigene000096	4.37046	7.34873e-05	0.00164642	Unigene021179	-3.61969	9.62246e-07	2.66423e-05
Unigene029680	1.0738	7.37921e-05	0.0016511	Unigene048334	2.00506	9.67462e-07	2.67517e-05
Unigene023166	1.48581	7.42543e-05	0.00165928	Unigene027108	-3.43011	9.92597e-07	2.74109e-05
Unigene015173	1.80082	7.49618e-05	0.00167291	Unigene047461	1.44812	9.95941e-07	2.74675e-05
Unigene043863	-2.20778	7.53916e-05	0.00168032	Unigene024136	2.36599	1.00271e-06	2.75823e-05
Unigene045838	1.48445	7.55072e-05	0.00168072	Unigene030688	-1.93829	1.00263e-06	2.75823e-05
Unigene018711	2.7287	7.60687e-05	0.00169103	Unigene026076	-2.03918	1.00625e-06	2.76439e-05
Unigene024445	-2.88156	7.67356e-05	0.0017025	Unigene008407	3.98839	1.01698e-06	2.79024e-05
Unigene042833	1.86423	7.80662e-05	0.00172872	Unigene021039	-7.61752	1.04482e-06	2.8629e-05
Unigene034523	-1.77629	7.84732e-05	0.0017355	Unigene039378	3.72534	1.05842e-06	2.89644e-05
Unigene033450	-1.24825	7.89536e-05	0.00174388	Unigene022649	3.517	1.08254e-06	2.95863e-05
Unigene033907	1.26345	7.91864e-05	0.00174678	Unigene037667	1.98879	1.09082e-06	2.9774e-05
Unigene037516	1.00618	7.98198e-05	0.00175849	Unigene043417	7.63904	1.09339e-06	2.98059e-05
Unigene034202	1.85918	8.02173e-05	0.00176251	Unigene034027	2.10028	1.09584e-06	2.98342e-05
Unigene048257	-1.42693	8.01798e-05	0.00176251	Unigene041682	-5.27404	1.11221e-06	3.0241e-05
Unigene049145	5.55505	8.03101e-05	0.00176251	Unigene042910	1.11318	1.11378e-06	3.02449e-05
Unigene037739	-3.73712	8.04506e-05	0.00176335	Unigene022580	2.46026	1.1796e-06	3.19911e-05
Unigene000307	-1.9178	8.09836e-05	0.00176826	Unigene032810	-2.23225	1.20129e-06	3.25377e-05
Unigene017380	-4.27203	8.09719e-05	0.00176826	Unigene043692	-2.18188	1.20897e-06	3.2704e-05
Unigene029271	-5.49041	8.08176e-05	0.00176826	Unigene045337	4.61062	1.2341e-06	3.33413e-05
Unigene020958	-6.12468	8.15737e-05	0.00177889	Unigene014588	-2.71705	1.24706e-06	3.36201e-05
Unigene018401	-2.51971	8.19865e-05	0.00178359	Unigene025571	1.88999	1.2476e-06	3.36201e-05
Unigene019861	2.37853	8.19969e-05	0.00178359	Unigene025329	1.47572	1.26043e-06	3.39227e-05
Unigene030862	-3.17289	8.29013e-05	0.00180098	Unigene028818	2.4715	1.28453e-06	3.45274e-05
Unigene015927	-2.67445	8.33187e-05	0.00180776	Unigene024408	1.42445	1.28788e-06	3.45737e-05
Unigene020083	-1.95592	8.36922e-05	0.00181358	Unigene014100	-7.50671	1.29188e-06	3.45932e-05
Unigene017441	1.61022	8.42293e-05	0.00182292	Unigene022045	2.14491	1.3225e-06	3.53684e-05
Unigene034323	1.82258	8.47464e-05	0.0018318	Unigene048294	2.33367	1.33042e-06	3.55355e-05
Unigene032661	1.46925	8.50932e-05	0.00183699	Unigene041237	-2.52633	1.33942e-06	3.57309e-05
Unigene026045	-1.93261	8.66759e-05	0.00186881	Unigene015314	-3.26141	1.34982e-06	3.5963e-05
Unigene026809	-1.09947	8.69583e-05	0.00187255	Unigene030318	-4.05239	1.35558e-06	3.60711e-05
Unigene046074	-2.65835	8.77445e-05	0.00188475	Unigene033159	-5.12587	1.42238e-06	3.78011e-05
Unigene047352	1.7616	8.76518e-05	0.00188475	Unigene020373	1.83835	1.43664e-06	3.81322e-05
Unigene052596	1.32202	8.78579e-05	0.00188483	Unigene020727	4.13133	1.49379e-06	3.95996e-05
Unigene011729	1.20549	8.83759e-05	0.00189358	Unigene023094	1.21381	1.50548e-06	3.98593e-05
Unigene033946	1.06448	8.90715e-05	0.00190611	Unigene020892	-7.47722	1.51132e-06	3.9964e-05
Unigene024845	-1.30098	8.98686e-05	0.00192077	Unigene018714	-7.46114	1.51851e-06	4.01043e-05
Unigene026453	-3.38742	9.174e-05	0.00195591	Unigene025508	1.47976	1.52276e-06	4.01664e-05
Unigene033486	-2.73354	9.1733e-05	0.00195591	Unigene034110	2.34934	1.56473e-06	4.1222e-05
Unigene036073	-3.38665	9.1863e-05	0.0019561	Unigene046543	-1.33903	1.62543e-06	4.2768e-05
Unigene038822	1.04628	9.30322e-05	0.00197855	Unigene035393	1.91707	1.63198e-06	4.28869e-05
Unigene027258	1.10847	9.33605e-05	0.00198307	Unigene041015	1.335	1.6341e-06	4.28897e-05
Unigene043323	-3.37473	9.41272e-05	0.00199443	Unigene029886	2.59809	1.63932e-06	4.29733e-05
Unigene031925	-2.97523	9.48173e-05	0.00200658	Unigene026454	-6.59479	1.7628e-06	4.60962e-05
Unigene013737	2.62996	9.51301e-05	0.00201072	Unigene040413	-2.09689	1.77612e-06	4.63872e-05
Unigene038733	-3.14628	9.53845e-05	0.00201362	Unigene021820	1.72603	1.78942e-06	4.66769e-05
Unigene024205	1.11595	9.60044e-05	0.00202422	Unigene027167	1.62404	1.82881e-06	4.75873e-05
Unigene046546	1.94456	9.6413e-05	0.00203034	Unigene044881	1.66605	1.82758e-06	4.75873e-05
Unigene033730	-2.17437	9.7128e-05	0.0020429	Unigene020133	-4.04968	1.86418e-06	4.8448e-05
Unigene012468	-1.82076	9.74829e-05	0.00204786	Unigene022928	-6.57537	1.91386e-06	4.96783e-05
Unigene038375	-2.4137	9.78187e-05	0.0020524	Unigene014207	-4.00114	1.94348e-06	5.03854e-05
Unigene045598	-2.62673	9.94648e-05	0.00208439	Unigene020774	-2.52071	1.95853e-06	5.07134e-05
Unigene044106	-2.7231	0.000100464	0.00210278	Unigene020556	-7.38881	1.96821e-06	5.09018e-05
Unigene012335	-1.52949	0.000101309	0.00211788	Unigene016032	3.82963	1.99028e-06	5.14098e-05
Unigene047382	-2.37654	0.00010204	0.00213057	Unigene034598	-2.34256	2.04415e-06	5.2737e-05
Unigene017776	-3.66904	0.000104752	0.00218454	Unigene023950	-5.15257	2.11282e-06	5.44423e-05
Unigene029045	1.56836	0.000105369	0.00219475	Unigene023056	-1.96319	2.14329e-06	5.51605e-05
Unigene030790	1.47457	0.000106291	0.00221127	Unigene046184	-3.98392	2.17412e-06	5.5886e-05
Unigene022226	-1.44021	0.000106525	0.00221319	Unigene027170	1.3876	2.18614e-06	5.61269e-05
Unigene023511	-3.3481	0.000106641	0.00221319	Unigene021880	2.21373	2.21191e-06	5.67196e-05
Unigene021875	3.18908	0.000107272	0.0022236	Unigene039379	1.71426	2.24692e-06	5.75479e-05
Unigene020192	1.18593	0.000109426	0.00226551	Unigene022810	1.27204	2.30443e-06	5.89494e-05
Unigene030751	-1.86144	0.000110795	0.0022911	Unigene031103	-2.74011	2.31275e-06	5.90197e-05
Unigene040827	1.54131	0.000111149	0.00229565	Unigene041552	-3.98133	2.31245e-06	5.90197e-05
Unigene009213	-5.96993	0.000114662	0.0023597	Unigene039547	4.07248	2.34623e-06	5.9802e-05
Unigene036586	2.52055	0.000114874	0.00236124	Unigene000307	-2.55713	2.38639e-06	6.07345e-05
Unigene014357	1.35242	0.00011558	0.00236829	Unigene044210	-1.04149	2.38855e-06	6.07345e-05
Unigene014509	2.46669	0.000115388	0.00236829	Unigene018618	-1.56481	2.40566e-06	6.10962e-05
Unigene047462	2.42751	0.00011563	0.00236829	Unigene029271	-7.43984	2.42035e-06	6.13957e-05
Unigene037034	1.23261	0.000116572	0.00238473	Unigene033645	1.69491	2.43069e-06	6.15843e-05
Unigene033440	3.02232	0.000116928	0.00238916	Unigene029440	-1.98933	2.45449e-06	6.21131e-05
Unigene034005	-2.25446	0.000119083	0.00243031	Unigene028698	1.41997	2.57833e-06	6.51689e-05
Unigene032177	1.43137	0.000119468	0.00243529	Unigene029518	2.65671	2.61242e-06	6.59518e-05
Unigene021098	1.11629	0.000119926	0.00244172	Unigene006442	3.69778	2.71665e-06	6.84201e-05
Unigene024695	1.71036	0.000121842	0.00247778	Unigene026317	-3.17061	2.71447e-06	6.84201e-05
Unigene023059	1.32067	0.000124831	0.00253258	Unigene029884	-1.7926	2.8273e-06	7.11225e-05
Unigene024498	2.01271	0.000126476	0.00256294	Unigene026897	-4.34616	2.83407e-06	7.12081e-05
Unigene025741	1.16887	0.000127766	0.00258602	Unigene025823	1.41056	2.84934e-06	7.15071e-05
Unigene041258	-1.77153	0.000128924	0.00260639	Unigene032438	1.63634	2.85605e-06	7.15906e-05
Unigene008827	-5.91269	0.000130763	0.00264045	Unigene023916	2.96031	2.86467e-06	7.17217e-05
Unigene040508	-1.97854	0.000131677	0.00265579	Unigene036393	2.50464	2.8787e-06	7.19878e-05
Unigene038197	-2.67513	0.000132091	0.00265826	Unigene041680	-4.45693	2.89086e-06	7.22068e-05
Unigene041693	1.14284	0.000132109	0.00265826	Unigene013668	-4.33487	2.95216e-06	7.36509e-05
Unigene018517	-5.90934	0.000132541	0.00266253	Unigene020130	1.86642	2.99234e-06	7.45655e-05
Unigene025811	-5.27237	0.00013263	0.00266253	Unigene024016	5.05459	3.02838e-06	7.52865e-05
Unigene027576	-1.06904	0.000134993	0.0027068	Unigene022605	-2.45255	3.09264e-06	7.67938e-05
Unigene046717	1.20841	0.000139947	0.00280285	Unigene024497	1.74052	3.11935e-06	7.73664e-05
Unigene037335	1.03832	0.000140527	0.00281119	Unigene045780	-4.97011	3.1637e-06	7.83747e-05
Unigene035614	1.6311	0.000142062	0.00283859	Unigene021948	1.75329	3.22676e-06	7.98435e-05
Unigene036024	1.22109	0.000143493	0.00286386	Unigene044817	1.50135	3.25761e-06	8.05127e-05
Unigene044553	-3.06235	0.000144035	0.00287135	Unigene020546	1.37742	3.28552e-06	8.1029e-05
Unigene041998	-4.10392	0.000144629	0.00287984	Unigene024856	-2.887	3.28817e-06	8.1029e-05
Unigene041519	-1.96845	0.000147093	0.00292552	Unigene037516	1.06456	3.28997e-06	8.1029e-05
Unigene041129	-3.06087	0.000147308	0.0029264	Unigene026504	-2.53313	3.32984e-06	8.19156e-05
Unigene018459	2.49099	0.000147785	0.00293249	Unigene022592	1.7847	3.35542e-06	8.23537e-05
Unigene016576	-2.55792	0.000148434	0.00293519	Unigene017065	-3.6509	3.43969e-06	8.43241e-05
Unigene029773	-1.83029	0.00014831	0.00293519	Unigene017502	3.61095	3.4589e-06	8.46971e-05
Unigene041879	1.51541	0.000148331	0.00293519	Unigene019795	1.45947	3.57966e-06	8.75528e-05
Unigene029942	1.27689	0.000149093	0.00294484	Unigene030669	1.31761	3.59938e-06	8.79336e-05
Unigene037462	-1.80665	0.000149461	0.00294873	Unigene018733	7.26488	3.61117e-06	8.812e-05
Unigene033780	-1.83737	0.000150783	0.0029714	Unigene023130	1.29098	3.6426e-06	8.87847e-05
Unigene031042	2.61544	0.000156456	0.00307069	Unigene033295	3.01776	3.81015e-06	9.2549e-05
Unigene033063	-1.68273	0.000156279	0.00307069	Unigene020560	-2.01601	3.9265e-06	9.52659e-05
Unigene036895	1.37235	0.000156536	0.00307069	Unigene016226	-7.16618	3.94006e-06	9.54855e-05
Unigene045356	1.30539	0.000156389	0.00307069	Unigene022949	1.67662	3.96547e-06	9.5882e-05
Unigene000292	-5.84194	0.000156888	0.00307164	Unigene012268	4.01305	4.02441e-06	9.70855e-05
Unigene039547	3.32427	0.000156942	0.00307164	Unigene025001	-1.66728	4.02403e-06	9.70855e-05
Unigene029027	-3.25919	0.000157862	0.00308612	Unigene037567	-4.91817	4.14496e-06	9.97663e-05
Unigene031793	-1.09161	0.000158275	0.00309069	Unigene022439	1.27209	4.2925e-06	0.000103083
Unigene042407	-3.57337	0.000159851	0.00311792	Unigene025248	-1.76376	4.30004e-06	0.000103147
Unigene028109	1.37478	0.000161414	0.00313772	Unigene036429	1.14575	4.33509e-06	0.00010387
Unigene031707	-4.07272	0.00016136	0.00313772	Unigene029951	-3.12508	4.41821e-06	0.000105742
Unigene037119	-4.07193	0.000162119	0.00314785	Unigene032996	-3.87503	4.4331e-06	0.000105979
Unigene024788	-2.75604	0.000162939	0.00315935	Unigene043268	1.46569	4.46732e-06	0.000106677
Unigene034271	-1.91927	0.000163263	0.00315935	Unigene040338	-2.72798	4.56135e-06	0.0001088
Unigene034741	-2.07611	0.00016314	0.00315935	Unigene019621	-4.88687	4.66993e-06	0.000111264
Unigene039488	-2.75515	0.000163976	0.00316856	Unigene038006	-6.31565	4.72697e-06	0.000112497
Unigene043882	1.06963	0.000164107	0.00316856	Unigene042824	-4.88431	4.90462e-06	0.000116593
Unigene058625	4.15438	0.000164819	0.00317874	Unigene022276	4.94967	4.97306e-06	0.000118088
Unigene025309	-1.54728	0.000165345	0.00318245	Unigene043058	-3.85595	5.01001e-06	0.000118832
Unigene025720	-2.8674	0.000165382	0.00318245	Unigene047382	-4.86952	5.07314e-06	0.000120195
Unigene025623	1.08301	0.000165831	0.00318752	Unigene041258	-2.22926	5.09308e-06	0.000120533
Unigene042882	1.51315	0.000166102	0.00318916	Unigene019002	1.20008	5.10333e-06	0.00012064
Unigene022359	1.09461	0.000167041	0.0032036	Unigene033866	2.74065	5.22158e-06	0.000123161
Unigene012513	-2.53573	0.000167446	0.0032078	Unigene027119	1.19859	5.29057e-06	0.000124649
Unigene033563	2.38438	0.000171272	0.0032738	Unigene026478	-1.89137	5.39106e-06	0.000126876
Unigene039681	1.34723	0.000171126	0.0032738	Unigene040737	1.27724	5.42032e-06	0.000127423
Unigene047460	2.54539	0.000172244	0.00328295	Unigene038609	1.40067	5.44125e-06	0.000127773
Unigene017806	2.18667	0.000173084	0.00329378	Unigene025250	3.20226	5.48474e-06	0.000128651
Unigene024873	1.03595	0.000174376	0.00331469	Unigene024706	1.68778	5.55972e-06	0.000130266
Unigene025920	1.3247	0.000175276	0.00332475	Unigene040032	4.92793	5.59013e-06	0.000130834
Unigene031040	1.05861	0.00017566	0.00332475	Unigene024841	-7.05297	5.68212e-06	0.00013284
Unigene032195	1.40572	0.000175679	0.00332475	Unigene040155	1.92432	5.73923e-06	0.00013388
Unigene036032	-2.31801	0.000175664	0.00332475	Unigene042858	1.16436	5.77992e-06	0.00013468
Unigene038930	-3.5431	0.000176284	0.00333253	Unigene011034	-3.09063	5.8073e-06	0.00013517
Unigene017845	-3.54169	0.000178234	0.00336569	Unigene016297	-3.56799	5.93088e-06	0.000137895
Unigene036031	-1.28732	0.000179024	0.0033769	Unigene019072	-6.24664	5.96826e-06	0.000138358
Unigene040817	-2.0525	0.000179705	0.00338603	Unigene043402	3.6612	5.9704e-06	0.000138358
Unigene045337	3.61149	0.000181129	0.00340912	Unigene019401	1.69995	5.98246e-06	0.000138486
Unigene022126	1.28929	0.000181804	0.00341808	Unigene026809	-1.07255	6.05448e-06	0.000139847
Unigene020616	2.38881	0.000182949	0.00343585	Unigene038716	-2.12244	6.04862e-06	0.000139847
Unigene036466	-5.16334	0.000183231	0.00343738	Unigene037677	-2.06304	6.12474e-06	0.000141316
Unigene024787	-1.09382	0.000183897	0.00344612	Unigene039721	3.18032	6.31488e-06	0.000145545
Unigene027849	1.28219	0.00018489	0.00345343	Unigene042004	2.3687	6.34846e-06	0.000146159
Unigene039459	1.20783	0.000184794	0.00345343	Unigene022314	-4.21746	6.4024e-06	0.000147241
Unigene042177	1.72095	0.000184729	0.00345343	Unigene022772	1.73986	6.41412e-06	0.000147351
Unigene046822	3.12826	0.000185987	0.00346639	Unigene043444	-3.81583	6.56951e-06	0.000150681
Unigene047071	2.33552	0.000185944	0.00346639	Unigene037805	1.95061	6.61696e-06	0.000151518
Unigene036252	-1.39658	0.00018802	0.00349668	Unigene016642	-4.26843	6.65779e-06	0.000152288
Unigene027085	-3.00327	0.000189984	0.00352939	Unigene003148	-3.12891	6.68441e-06	0.000152732
Unigene046241	1.84235	0.000191374	0.00355138	Unigene017456	-6.20947	6.85768e-06	0.000156354
Unigene039562	1.83519	0.000192547	0.00356929	Unigene037191	-6.20947	6.85768e-06	0.000156354
Unigene023251	-1.83156	0.000197251	0.00363716	Unigene034629	1.08737	6.87404e-06	0.000156558
Unigene033356	-1.54785	0.000197267	0.00363716	Unigene016948	1.61949	7.00378e-06	0.000159342
Unigene034121	-2.19338	0.000198576	0.00365737	Unigene039069	1.834	7.16903e-06	0.000162926
Unigene010712	1.84065	0.00019941	0.0036688	Unigene023932	1.47126	7.20041e-06	0.000163464
Unigene041915	-2.35692	0.000200067	0.00367695	Unigene019351	-3.79723	7.2651e-06	0.000164756
Unigene044725	1.47018	0.000202595	0.00371944	Unigene033040	1.42399	7.28985e-06	0.000165141
Unigene024973	-1.40457	0.00020369	0.00373156	Unigene035735	1.92248	7.32277e-06	0.000165709
Unigene034728	1.48578	0.000203486	0.00373156	Unigene026954	-6.18615	7.33154e-06	0.00016573
Unigene021937	1.30974	0.000205391	0.00375871	Unigene013905	2.56186	7.39826e-06	0.00016706
Unigene003674	2.56056	0.000206801	0.00378051	Unigene015821	1.80202	7.59228e-06	0.00017121
Unigene024274	-3.20636	0.000208998	0.00381661	Unigene039363	-2.18312	7.59819e-06	0.00017121
Unigene017320	2.10138	0.00021153	0.00385873	Unigene010712	2.20345	7.70554e-06	0.000173444
Unigene042285	1.28686	0.000213671	0.00389367	Unigene021910	1.26915	7.88012e-06	0.000176917
Unigene042433	1.62187	0.000213994	0.00389541	Unigene038839	-6.95596	7.8849e-06	0.000176917
Unigene030898	1.11368	0.00021446	0.00389908	Unigene023562	-1.02402	7.92044e-06	0.000177527
Unigene039081	2.47825	0.000214649	0.00389908	Unigene045018	-6.16918	8.06682e-06	0.000180617
Unigene020266	-2.97247	0.000218832	0.00397087	Unigene047003	-2.71564	8.26062e-06	0.000184566
Unigene019795	1.11739	0.000219586	0.00398035	Unigene040817	-2.74083	8.57822e-06	0.000191258
Unigene044042	1.84323	0.000220052	0.00398458	Unigene023196	1.33923	8.74147e-06	0.000194562
Unigene024497	1.4491	0.000221706	0.00400609	Unigene033992	1.10101	8.74476e-06	0.000194562
Unigene016874	1.14709	0.000222565	0.00401739	Unigene025623	1.15342	8.95493e-06	0.00019882
Unigene034029	-2.27609	0.000225615	0.00406817	Unigene017776	-6.90393	8.97612e-06	0.000199082
Unigene017529	1.07811	0.000227608	0.00409981	Unigene022586	-2.06372	9.01087e-06	0.000199644
Unigene032781	-2.17182	0.000228441	0.0041105	Unigene040988	-1.74246	9.02209e-06	0.000199683
Unigene047809	4.04449	0.000232851	0.00418548	Unigene020362	-6.89818	9.03609e-06	0.000199784
Unigene013114	1.07248	0.000233856	0.00419914	Unigene020040	-1.5984	9.26929e-06	0.000204727
Unigene033986	1.03251	0.000235558	0.00422528	Unigene000534	6.97267	9.3367e-06	0.000206001
Unigene042193	-1.85341	0.000237499	0.00425472	Unigene017052	-6.93878	9.70832e-06	0.000213755
Unigene021359	-3.4143	0.000239907	0.00428987	Unigene022703	1.70104	9.76777e-06	0.00021484
Unigene011511	4.50192	0.000240586	0.00429753	Unigene021971	1.42429	9.78585e-06	0.000215015
Unigene030734	2.2258	0.000242916	0.00433015	Unigene010952	2.77957	1.00262e-05	0.000220067
Unigene035747	-3.16218	0.000242842	0.00433015	Unigene034118	3.83225	1.01196e-05	0.000221888
Unigene026097	-1.40058	0.0002442	0.00434852	Unigene015211	6.1861	1.02983e-05	0.000225571
Unigene029421	1.8428	0.000245829	0.00437301	Unigene026072	-6.08276	1.03406e-05	0.000226032
Unigene027407	1.49163	0.000246157	0.00437432	Unigene037463	1.07428	1.0331e-05	0.000226032
Unigene022150	1.25881	0.000251023	0.00445618	Unigene004545	-6.86296	1.04079e-05	0.000227267
Unigene036568	1.21251	0.000252496	0.00447308	Unigene022978	1.82523	1.05269e-05	0.000229392
Unigene031695	-1.71936	0.000256003	0.00452588	Unigene047487	-2.99963	1.05242e-05	0.000229392
Unigene023094	1.04641	0.000257644	0.00455021	Unigene025644	1.45146	1.06298e-05	0.000231397
Unigene001372	1.84931	0.000258181	0.00455501	Unigene026430	1.88841	1.07764e-05	0.000234107
Unigene011158	3.98798	0.000261723	0.00460804	Unigene030605	-3.32502	1.07682e-05	0.000234107
Unigene045017	-3.93466	0.000261585	0.00460804	Unigene035015	1.49618	1.07877e-05	0.000234114
Unigene019386	2.89565	0.000263036	0.00461469	Unigene038375	-3.35155	1.14241e-05	0.000247671
Unigene030378	-1.18736	0.000263175	0.00461469	Unigene020795	1.13194	1.159e-05	0.000251009
Unigene039827	-3.44079	0.000262887	0.00461469	Unigene030365	-3.12933	1.16168e-05	0.000251333
Unigene044587	-1.50917	0.000262599	0.00461469	Unigene021648	1.21972	1.17602e-05	0.000254175
Unigene017052	-5.02414	0.000264657	0.00463595	Unigene029398	1.2899	1.17787e-05	0.000254317
Unigene034734	1.00217	0.000265213	0.00464095	Unigene046262	-3.04587	1.18311e-05	0.000255188
Unigene022594	1.45613	0.000265746	0.00464556	Unigene034121	-3.1482	1.19167e-05	0.000256773
Unigene042588	1.43185	0.000267092	0.00466433	Unigene023344	3.80339	1.20563e-05	0.000259516
Unigene038784	-3.14183	0.000271011	0.00472317	Unigene036032	-3.26552	1.20977e-05	0.000260144
Unigene035421	-5.57895	0.000273191	0.00475635	Unigene033608	2.21772	1.23098e-05	0.000264436
Unigene027565	-5.57815	0.000273548	0.00475774	Unigene029122	-1.3115	1.25253e-05	0.000268521
Unigene010889	-5.57827	0.000274608	0.00476173	Unigene020698	1.57663	1.25765e-05	0.000269345
Unigene023270	-5.57827	0.000274608	0.00476173	Unigene030490	1.74144	1.27876e-05	0.00027342
Unigene031468	2.51935	0.000276162	0.00477903	Unigene052394	4.06433	1.28374e-05	0.000274101
Unigene040121	1.12909	0.000276135	0.00477903	Unigene020616	2.75141	1.30351e-05	0.000277763
Unigene016588	-3.12791	0.000278116	0.00480398	Unigene041702	2.08798	1.30724e-05	0.000278279
Unigene025753	1.71246	0.000279729	0.00482617	Unigene012161	-6.7686	1.33448e-05	0.000283506
Unigene033469	-2.01441	0.00028956	0.00498576	Unigene031707	-6.7686	1.33448e-05	0.000283506
Unigene026364	3.98903	0.000291043	0.00500628	Unigene022556	1.19747	1.35291e-05	0.000287134
Unigene029344	1.12688	0.000292902	0.00503323	Unigene021704	2.116	1.3722e-05	0.000290937
Unigene038839	-2.7596	0.000298213	0.00511937	Unigene029309	-1.48637	1.38515e-05	0.000293388
Unigene045729	2.36159	0.00030108	0.00516343	Unigene003674	2.98463	1.40776e-05	0.000297881
Unigene035267	1.41712	0.000304645	0.00520898	Unigene034198	1.40001	1.42149e-05	0.000300484
Unigene042020	-1.67626	0.000306325	0.0052325	Unigene044642	1.56006	1.43826e-05	0.000303726
Unigene025618	-2.60863	0.00031817	0.00542404	Unigene018339	1.78025	1.4445e-05	0.00030474
Unigene024729	-2.4283	0.00031937	0.00543911	Unigene039974	2.57708	1.45794e-05	0.00030727
Unigene032329	-5.50131	0.000320817	0.00545833	Unigene032455	-4.05364	1.4601e-05	0.00030742
Unigene020880	-3.86732	0.000322398	0.00547981	Unigene026734	2.7161	1.48008e-05	0.000311317
Unigene030329	1.41636	0.000327026	0.00555299	Unigene023479	1.22986	1.49803e-05	0.000314263
Unigene012630	-5.49804	0.000327979	0.00556367	Unigene027939	-6.73508	1.49854e-05	0.000314263
Unigene019457	-1.23318	0.000335454	0.00566809	Unigene028384	-2.46888	1.49785e-05	0.000314263
Unigene034232	-2.87669	0.000334819	0.00566809	Unigene021292	-2.65465	1.52643e-05	0.000319796
Unigene039397	-2.71905	0.000335418	0.00566809	Unigene045400	1.58062	1.53865e-05	0.000322038
Unigene042046	2.21397	0.000337682	0.00570013	Unigene038003	1.0732	1.55041e-05	0.000324177
Unigene017991	-1.15103	0.00033983	0.00572514	Unigene029670	1.58077	1.56999e-05	0.000327949
Unigene019971	-2.26354	0.000339637	0.00572514	Unigene036210	1.24028	1.60323e-05	0.000334563
Unigene043454	1.07276	0.000342537	0.00576508	Unigene026074	1.06304	1.6178e-05	0.00033727
Unigene021247	1.38413	0.000355387	0.0059755	Unigene019299	-2.63638	1.63702e-05	0.000340725
Unigene020494	-2.63476	0.000357543	0.00600588	Unigene032781	-2.94254	1.63759e-05	0.000340725
Unigene056584	-1.57646	0.000361209	0.00606154	Unigene029052	-3.27207	1.64744e-05	0.000342102
Unigene021269	-3.82942	0.000362644	0.00607429	Unigene003253	-6.71093	1.65217e-05	0.000342748
Unigene034987	-2.58075	0.000363029	0.00607429	Unigene027496	-3.43628	1.66218e-05	0.000344487
Unigene035069	1.15722	0.000362688	0.00607429	Unigene024845	-1.24519	1.68175e-05	0.000348203
Unigene024767	-2.0512	0.000365015	0.00610157	Unigene033434	-3.29344	1.69581e-05	0.000350429
Unigene036404	1.59398	0.000366904	0.00612719	Unigene034005	-3.08694	1.73159e-05	0.000357473
Unigene017463	-3.827	0.000368144	0.00614193	Unigene018216	-1.50276	1.75387e-05	0.000361721
Unigene022810	1.07902	0.000368931	0.00614909	Unigene029519	2.66551	1.77536e-05	0.000365797
Unigene031103	-1.74863	0.00036931	0.00614945	Unigene032573	-1.71057	1.81468e-05	0.000373536
Unigene039417	1.07487	0.000369853	0.00615251	Unigene014134	2.91506	1.8285e-05	0.000375649
Unigene037169	3.41987	0.000371771	0.00617248	Unigene018481	-6.66426	1.82765e-05	0.000375649
Unigene039650	-1.52828	0.000372142	0.00617268	Unigene043357	1.78388	1.83865e-05	0.000377368
Unigene011872	2.18962	0.000373635	0.00619145	Unigene018247	-6.66291	1.84818e-05	0.000378958
Unigene008826	-5.42276	0.000375074	0.00619737	Unigene030697	-2.07604	1.86282e-05	0.000381591
Unigene016019	-5.42364	0.000374551	0.00619737	Unigene025824	-2.28592	1.87747e-05	0.00038422
Unigene020208	2.40059	0.00037488	0.00619737	Unigene015862	-6.66358	1.88193e-05	0.000384503
Unigene058442	-3.82223	0.000375911	0.00620524	Unigene033730	-2.72111	1.8843e-05	0.000384503
Unigene036330	1.0606	0.000377272	0.00622173	Unigene044301	6.00467	1.8838e-05	0.000384503
Unigene039065	1.20615	0.000392922	0.00646122	Unigene007930	1.16065	1.8865e-05	0.000384581
Unigene020575	-3.33157	0.000394296	0.00647762	Unigene039965	-4.58199	1.90708e-05	0.000388029
Unigene003148	-1.91014	0.000394884	0.00648108	Unigene033986	1.0537	1.91372e-05	0.000389007
Unigene044699	1.24769	0.000400877	0.00657316	Unigene018281	-4.6244	1.91871e-05	0.000389647
Unigene039974	2.14942	0.000405853	0.00664207	Unigene028997	1.56036	1.97934e-05	0.000401575
Unigene046726	1.01465	0.000405766	0.00664207	Unigene042965	-2.34132	1.98765e-05	0.000402875
Unigene019463	-2.29893	0.000406278	0.00664271	Unigene017637	-6.62617	2.07431e-05	0.000420037
Unigene031479	-3.78937	0.000410095	0.00669238	Unigene024009	-2.90551	2.09295e-05	0.000423408
Unigene017065	-2.07801	0.000410701	0.00669591	Unigene028333	-1.07545	2.1005e-05	0.000424529
Unigene027035	-3.03681	0.000411517	0.00670285	Unigene024759	1.6725	2.11798e-05	0.000427655
Unigene022572	1.10111	0.000416507	0.0067777	Unigene045017	-6.6233	2.12047e-05	0.000427749
Unigene032464	1.47633	0.000421429	0.00684483	Unigene031937	-2.49535	2.16392e-05	0.000435684
Unigene038469	-2.17278	0.000421115	0.00684483	Unigene037192	-5.85201	2.18578e-05	0.000439667
Unigene019793	1.23854	0.000422116	0.00684952	Unigene043814	1.83912	2.22605e-05	0.000447343
Unigene023439	-2.44652	0.000424408	0.00688021	Unigene041400	3.73919	2.24662e-05	0.000451049
Unigene022374	1.19128	0.000425959	0.00689886	Unigene028546	-3.37672	2.26255e-05	0.000453818
Unigene022702	1.41957	0.00042637	0.006899	Unigene023751	-1.78201	2.27981e-05	0.000456745
Unigene025228	1.51825	0.00042882	0.0069256	Unigene031695	-2.08191	2.28146e-05	0.000456745
Unigene027420	2.09325	0.000430034	0.00692596	Unigene024445	-3.60379	2.31582e-05	0.000463186
Unigene041355	-1.85977	0.000430454	0.00692596	Unigene033469	-2.62126	2.35332e-05	0.000470242
Unigene044765	-2.29302	0.000430433	0.00692596	Unigene045819	-3.16312	2.37299e-05	0.000473725
Unigene046130	-1.74402	0.000429828	0.00692596	Unigene040277	1.84326	2.38927e-05	0.000476526
Unigene013814	1.31793	0.000436707	0.0070102	Unigene028583	2.51168	2.41013e-05	0.000480236
Unigene028383	-2.35502	0.000436745	0.0070102	Unigene028441	-1.6897	2.46979e-05	0.000491198
Unigene045871	-1.54698	0.000436913	0.0070102	Unigene029045	1.62227	2.49434e-05	0.000495616
Unigene029346	-3.30566	0.00044223	0.00708889	Unigene022492	1.75517	2.52421e-05	0.00050108
Unigene032127	1.15552	0.000444831	0.00712166	Unigene017196	1.2723	2.52954e-05	0.000501669
Unigene040816	-2.80865	0.000445104	0.00712166	Unigene023968	1.2314	2.58398e-05	0.000511662
Unigene030411	-2.65517	0.000445622	0.00712332	Unigene015799	-2.19055	2.60337e-05	0.00051376
Unigene031306	1.52333	0.000447682	0.00714297	Unigene034943	-1.32216	2.60148e-05	0.00051376
Unigene042826	-1.34277	0.000450205	0.00717655	Unigene045871	-2.13682	2.60506e-05	0.00051376
Unigene037236	1.14249	0.000456845	0.00726906	Unigene026654	-1.00361	2.64538e-05	0.000521226
Unigene046022	-1.8477	0.000456855	0.00726906	Unigene039871	-2.88769	2.66249e-05	0.000524109
Unigene035905	1.02228	0.00046134	0.00733365	Unigene020735	2.87028	2.66878e-05	0.000524859
Unigene021746	1.17932	0.000463555	0.00735524	Unigene035975	1.3419	2.68362e-05	0.000527288
Unigene041015	1.06154	0.000463189	0.00735524	Unigene021525	-3.00279	2.68883e-05	0.000527823
Unigene014714	-2.06624	0.000466247	0.00738432	Unigene039970	-1.33397	2.69542e-05	0.000528611
Unigene016810	-1.62035	0.000469993	0.0074368	Unigene046130	-2.28285	2.69784e-05	0.000528611
Unigene047930	1.63481	0.000481907	0.00760431	Unigene017930	-2.00368	2.72373e-05	0.000532794
Unigene028173	1.64176	0.000490376	0.00770962	Unigene045598	-3.16342	2.72673e-05	0.000532794
Unigene043814	1.56812	0.000490371	0.00770962	Unigene011872	2.57887	2.73124e-05	0.000533183
Unigene017030	1.11254	0.000496925	0.00779831	Unigene045369	-2.68561	2.79822e-05	0.000545757
Unigene019748	1.98579	0.000501349	0.0078534	Unigene038197	-4.49434	2.80102e-05	0.000545799
Unigene022661	1.17709	0.000517485	0.00809142	Unigene035031	1.64873	2.84271e-05	0.000553414
Unigene038775	1.00842	0.000517106	0.00809142	Unigene018266	-1.02796	2.85915e-05	0.000556103
Unigene022057	1.03077	0.000518081	0.00809336	Unigene021705	-1.30277	2.87753e-05	0.000559164
Unigene013564	-5.25128	0.000520405	0.00809767	Unigene021773	-2.76063	2.89262e-05	0.000561581
Unigene017637	-4.72827	0.000519557	0.00809767	Unigene036917	1.45654	2.90503e-05	0.000563475
Unigene020216	-3.71072	0.000520043	0.00809767	Unigene033063	-1.83015	2.94002e-05	0.00056974
Unigene028749	-5.25031	0.000521184	0.00809767	Unigene044486	1.28286	2.98775e-05	0.00057846
Unigene051679	-5.25031	0.000521184	0.00809767	Unigene058442	-6.50449	3.00301e-05	0.000580354
Unigene038421	-3.71074	0.000521667	0.00809785	Unigene019911	-4.47222	3.06366e-05	0.000591535
Unigene015272	-5.25021	0.000523436	0.0081162	Unigene022387	1.2549	3.077e-05	0.000593109
Unigene036309	1.17091	0.000523793	0.0081162	Unigene029428	1.51546	3.07741e-05	0.000593109
Unigene021168	3.20342	0.000526625	0.00815273	Unigene023610	-2.04876	3.0934e-05	0.000595649
Unigene034492	-2.40534	0.000528401	0.00817285	Unigene046822	3.49659	3.15149e-05	0.000606283
Unigene018738	-2.24519	0.000534008	0.00824742	Unigene014814	-6.47318	3.15881e-05	0.000607139
Unigene044301	4.85873	0.000534181	0.00824742	Unigene048453	-2.16196	3.16269e-05	0.000607334
Unigene026490	-3.70481	0.000536173	0.00826416	Unigene025175	1.26789	3.23099e-05	0.000619887
Unigene034117	3.30841	0.000536379	0.00826416	Unigene034676	1.58042	3.23564e-05	0.000620217
Unigene045970	1.18271	0.000541921	0.00833695	Unigene041519	-2.16692	3.24795e-05	0.000622015
Unigene021599	1.0427	0.000549853	0.00845141	Unigene035115	1.99727	3.29886e-05	0.000630625
Unigene038041	2.07577	0.000554928	0.00852179	Unigene022653	1.47182	3.3288e-05	0.000635201
Unigene045208	-2.30588	0.000555472	0.00852252	Unigene031306	1.80836	3.36337e-05	0.000641219
Unigene020212	-2.48728	0.00055734	0.00853749	Unigene035273	1.08295	3.38291e-05	0.000644364
Unigene041614	1.90607	0.000557441	0.00853749	Unigene007369	2.19946	3.40552e-05	0.000648089
Unigene028299	1.64193	0.000559418	0.00856014	Unigene012814	-6.45995	3.42517e-05	0.000651243
Unigene019898	1.57767	0.000565951	0.00863704	Unigene033264	-1.9589	3.45465e-05	0.000656259
Unigene027215	-1.90982	0.000565902	0.00863704	Unigene045802	-2.56824	3.49918e-05	0.000664122
Unigene041781	1.09728	0.000568808	0.00867294	Unigene023938	1.6869	3.51038e-05	0.000665651
Unigene026386	-1.30268	0.000569495	0.00867571	Unigene038082	1.32213	3.52683e-05	0.000668173
Unigene035605	-2.9445	0.000575717	0.00876273	Unigene015708	1.32888	3.56786e-05	0.000675343
Unigene026884	-1.33341	0.0005815	0.00884292	Unigene046106	2.14736	3.606e-05	0.000681953
Unigene009352	-3.22365	0.000583388	0.00885596	Unigene020974	-1.51897	3.6616e-05	0.000690899
Unigene027900	-2.60134	0.000584504	0.00886207	Unigene030898	1.13625	3.6604e-05	0.000690899
Unigene033750	1.13665	0.000584822	0.00886207	Unigene034130	-2.25701	3.66309e-05	0.000690899
Unigene042224	-2.01403	0.000586414	0.00887836	Unigene019510	-1.93903	3.70244e-05	0.000697078
Unigene015626	-2.2946	0.000591926	0.0089414	Unigene031117	1.90859	3.69921e-05	0.000697078
Unigene023056	-1.26657	0.000592139	0.0089414	Unigene032142	1.87379	3.71936e-05	0.000699643
Unigene040988	-1.30203	0.00059853	0.00902998	Unigene034210	1.15029	3.75669e-05	0.000706038
Unigene036035	1.05737	0.000599606	0.00903828	Unigene021311	-4.42451	3.77034e-05	0.000707976
Unigene011917	1.58932	0.000602334	0.00907144	Unigene033425	2.79235	3.79661e-05	0.000712277
Unigene005325	-3.6608	0.000612432	0.00921545	Unigene033218	-2.62836	3.83211e-05	0.000718301
Unigene019298	-2.21736	0.000613444	0.00922259	Unigene015376	1.79757	3.88076e-05	0.000726777
Unigene034041	1.1636	0.000614593	0.00922404	Unigene018200	3.03681	3.90661e-05	0.000730971
Unigene046692	-1.38914	0.000614614	0.00922404	Unigene019971	-3.10006	3.92913e-05	0.000734536
Unigene022383	-1.67309	0.000619923	0.00929559	Unigene034828	-6.38643	4.01601e-05	0.000750116
Unigene038666	1.12917	0.000628055	0.00940932	Unigene023057	1.18437	4.02045e-05	0.000750283
Unigene035269	1.09192	0.00062897	0.00941483	Unigene021170	1.34987	4.03006e-05	0.000751414
Unigene037544	2.05043	0.000632835	0.00946443	Unigene016534	2.2275	4.07353e-05	0.000758531
Unigene038086	-1.51196	0.000635384	0.00949429	Unigene020512	2.69065	4.07539e-05	0.000758531
Unigene043070	2.51533	0.000639454	0.00954681	Unigene029299	-2.63095	4.08441e-05	0.000759542
Unigene026132	-1.88855	0.000642425	0.00958133	Unigene016386	-3.07473	4.11855e-05	0.000765219
Unigene027073	-2.36732	0.000642881	0.00958133	Unigene041497	2.47123	4.13897e-05	0.000768339
Unigene027373	-2.1419	0.000646342	0.00962457	Unigene034619	1.18611	4.14308e-05	0.000768428
Unigene040120	1.05583	0.000648557	0.00964918	Unigene026490	-6.37895	4.19029e-05	0.000776505
Unigene029686	1.25865	0.000649431	0.00965383	Unigene017884	1.37112	4.23516e-05	0.000784133
Unigene043815	-2.35523	0.000650976	0.00966844	Unigene042648	1.66993	4.25746e-05	0.000787574
Unigene036393	1.87041	0.000653302	0.0096946	Unigene037247	-4.39857	4.27734e-05	0.000790561
Unigene027183	1.67311	0.000656883	0.00973933	Unigene023248	-5.6348	4.28198e-05	0.000790729
Unigene044817	1.1784	0.000658164	0.00974991	Unigene017680	-2.99932	4.31501e-05	0.000796135
Unigene011159	3.04513	0.000664883	0.00984096	Unigene023883	-3.48783	4.35447e-05	0.000802583
Unigene034809	-3.62585	0.000666086	0.00985028	Unigene037512	-5.64574	4.35754e-05	0.000802583
Unigene013631	2.33488	0.000667473	0.00985551	Unigene029090	1.00286	4.38638e-05	0.000807193
Unigene016032	2.7771	0.000667587	0.00985551	Unigene023846	1.00729	4.3969e-05	0.000808427
Unigene031399	-3.17154	0.00067203	0.00990408	Unigene035794	-1.06412	4.41048e-05	0.000810219
Unigene034828	-3.17101	0.000675339	0.00993581	Unigene026322	2.62655	4.44857e-05	0.000815805
Unigene046859	-3.17101	0.000675339	0.00993581	Unigene006549	2.8012	4.48952e-05	0.0008226
				Unigene026545	-6.3438	4.49765e-05	0.000822667
				Unigene027425	-1.99458	4.49535e-05	0.000822667
				Unigene017277	4.45388	4.54522e-05	0.00083065
				Unigene045094	1.20952	4.56896e-05	0.000834269
				Unigene028500	1.25994	4.67854e-05	0.000852807
				Unigene033253	1.12714	4.67494e-05	0.000852807
				Unigene042585	-1.28164	4.68659e-05	0.000853539
				Unigene022453	-5.61221	4.70681e-05	0.000855881
				Unigene034854	1.96608	4.70753e-05	0.000855881
				Unigene028437	1.20019	4.78023e-05	0.00086761
				Unigene022204	-3.3464	4.80072e-05	0.000870582
				Unigene033241	-2.90791	4.85373e-05	0.000879442
				Unigene030862	-3.8045	4.89357e-05	0.000885904
				Unigene044432	2.48175	4.93336e-05	0.000892344
				Unigene025228	1.69896	4.96181e-05	0.000896723
				Unigene028210	-4.39793	5.03167e-05	0.000908575
				Unigene027378	1.012	5.04852e-05	0.000910687
				Unigene027442	1.56197	5.05614e-05	0.000910687
				Unigene034809	-6.29688	5.05627e-05	0.000910687
				Unigene036802	1.96098	5.0663e-05	0.000911719
				Unigene032991	1.80229	5.10941e-05	0.000917918
				Unigene019462	-1.91511	5.128e-05	0.000920477
				Unigene046049	-2.11815	5.13557e-05	0.000921055
				Unigene021862	-1.21388	5.19776e-05	0.000931419
				Unigene011615	-6.32021	5.23199e-05	0.000935969
				Unigene029272	-6.32021	5.23199e-05	0.000935969
				Unigene021860	4.41155	5.49434e-05	0.000982073
				Unigene034989	1.90731	5.506e-05	0.000983326
				Unigene023815	-2.52833	5.51451e-05	0.000984017
				Unigene027773	-1.37494	5.52136e-05	0.000984411
				Unigene048335	1.93897	5.71965e-05	0.00101805
				Unigene012900	-6.25034	5.73361e-05	0.00101882
				Unigene026579	1.36634	5.75975e-05	0.00102261
				Unigene018738	-3.19946	5.78181e-05	0.00102567
				Unigene017826	1.47674	5.81155e-05	0.00103008
				Unigene028790	-1.00623	5.83658e-05	0.00103365
				Unigene034743	1.68069	5.88721e-05	0.00104175
				Unigene045442	-2.25765	5.89375e-05	0.00104203
				Unigene022092	-5.52213	6.00587e-05	0.00106097
				Unigene022661	1.2808	6.06234e-05	0.00106986
				Unigene023363	3.2828	6.06631e-05	0.00106986
				Unigene031925	-3.18696	6.27317e-05	0.00110542
				Unigene011474	6.38242	6.37589e-05	0.00112259
				Unigene035569	1.09605	6.40883e-05	0.00112652
				Unigene017733	-2.86282	6.45612e-05	0.00113389
				Unigene017346	-6.20312	6.46988e-05	0.00113443
				Unigene032358	-5.50064	6.4655e-05	0.00113443
				Unigene036656	-1.76104	6.56828e-05	0.00115073
				Unigene012083	1.7381	6.59342e-05	0.00115418
				Unigene046022	-2.24669	6.69097e-05	0.00117028
				Unigene031434	1.10477	6.72489e-05	0.00117525
				Unigene003816	2.38049	6.73253e-05	0.00117561
				Unigene034017	1.63171	6.74978e-05	0.00117765
				Unigene025568	3.08876	6.80948e-05	0.00118709
				Unigene014562	2.18474	6.82929e-05	0.00118957
				Unigene032724	2.0528	6.93244e-05	0.00120654
				Unigene023970	1.07658	6.94866e-05	0.00120773
				Unigene045368	1.9656	6.9907e-05	0.00121369
				Unigene037236	1.20875	7.3035e-05	0.00126696
				Unigene019148	-6.15131	7.47283e-05	0.00129527
				Unigene024805	2.073	7.51764e-05	0.00130197
				Unigene016017	-5.4424	7.58158e-05	0.0013109
				Unigene033058	-1.31407	7.6172e-05	0.00131384
				Unigene036073	-4.2479	7.60974e-05	0.00131384
				Unigene044765	-3.00041	7.61128e-05	0.00131384
				Unigene009214	-6.14677	7.65513e-05	0.00131824
				Unigene037658	-6.14757	7.65228e-05	0.00131824
				Unigene029069	-1.85686	7.92506e-05	0.00136361
				Unigene036391	-2.03177	8.0524e-05	0.00138328
				Unigene029059	1.14599	8.08439e-05	0.00138765
				Unigene044051	1.27699	8.19233e-05	0.00140503
				Unigene020922	1.7771	8.24327e-05	0.00141263
				Unigene026229	2.15354	8.28435e-05	0.00141852
				Unigene027336	-1.20061	8.29547e-05	0.00141928
				Unigene020717	-5.44408	8.3537e-05	0.00142809
				Unigene044553	-4.22133	8.41223e-05	0.00143693
				Unigene008405	-6.10149	8.42795e-05	0.00143846
				Unigene026453	-3.35577	8.45512e-05	0.00144193
				Unigene040616	1.02789	8.52451e-05	0.00145143
				Unigene026857	-5.40048	8.56436e-05	0.00145704
				Unigene030290	-5.39988	8.60352e-05	0.00146253
				Unigene034492	-3.35426	8.63457e-05	0.00146645
				Unigene041129	-4.21864	8.65425e-05	0.00146645
				Unigene041355	-2.1679	8.6517e-05	0.00146645
				Unigene043323	-4.21829	8.64906e-05	0.00146645
				Unigene004151	2.61998	8.75078e-05	0.00148162
				Unigene032250	-3.6844	8.77424e-05	0.0014844
				Unigene017850	2.95407	8.94009e-05	0.00151125
				Unigene040542	-1.77233	9.02695e-05	0.00152472
				Unigene027073	-4.21259	9.14252e-05	0.00154301
				Unigene038717	-6.08693	9.20269e-05	0.00155193
				Unigene023511	-3.66769	9.30167e-05	0.00156737
				Unigene007769	2.78151	9.48366e-05	0.00159677
				Unigene045328	1.5085	9.5771e-05	0.00161122
				Unigene027703	2.28235	9.6118e-05	0.00161577
				Unigene018031	-6.07888	9.66203e-05	0.00162217
				Unigene048450	-2.07031	9.66519e-05	0.00162217
				Unigene020496	3.74972	9.6871e-05	0.00162456
				Unigene028993	1.23945	9.79806e-05	0.00164058
				Unigene040549	-2.15408	9.81987e-05	0.00164293
				Unigene019242	-1.65323	9.85945e-05	0.00164825
				Unigene017813	1.47889	0.000100215	0.00167401
				Unigene028737	1.51715	0.000100388	0.00167559
				Unigene042074	2.32884	0.00010174	0.00169682
				Unigene025668	-1.92604	0.000102466	0.00170758
				Unigene038503	-6.03709	0.000102955	0.00171437
				Unigene027085	-4.16583	0.000103527	0.00172255
				Unigene028794	-3.09286	0.000106008	0.00176244
				Unigene040039	1.42372	0.000107499	0.00178442
				Unigene013852	-6.02931	0.000107773	0.00178619
				Unigene020958	-6.02931	0.000107773	0.00178619
				Unigene022037	1.71562	0.000107931	0.0017874
				Unigene024407	-1.08119	0.000108316	0.00179238
				Unigene042187	-5.31499	0.00010972	0.00181419
				Unigene019191	1.25783	0.000109881	0.00181544
				Unigene025739	-2.23496	0.000110334	0.00182008
				Unigene030409	-1.50252	0.00011033	0.00182008
				Unigene037372	1.38493	0.000111682	0.00183952
				Unigene048586	-2.6112	0.000111686	0.00183952
				Unigene027215	-2.29232	0.000112852	0.00185728
				Unigene038469	-2.56278	0.000113577	0.00186777
				Unigene028141	1.57683	0.000114298	0.00187816
				Unigene019876	1.02768	0.000114592	0.00188153
				Unigene033639	-1.9499	0.000115647	0.00189738
				Unigene032819	2.14786	0.000115911	0.00190024
				Unigene034111	1.34172	0.000116504	0.00190467
				Unigene041915	-2.46632	0.000116451	0.00190467
				Unigene044120	-1.2675	0.000116541	0.00190467
				Unigene047951	-3.06936	0.000116508	0.00190467
				Unigene035000	1.11867	0.000117761	0.00192312
				Unigene020212	-4.13486	0.000117902	0.00192395
				Unigene029155	-5.97971	0.000120257	0.00195935
				Unigene036410	-2.13492	0.000120242	0.00195935
				Unigene017044	1.70834	0.000120689	0.00196489
				Unigene020686	1.41878	0.000121834	0.00197896
				Unigene021116	2.97149	0.000123627	0.00200654
				Unigene032582	-4.12958	0.000124047	0.00201182
				Unigene015687	-5.26831	0.000124644	0.00201841
				Unigene039107	-1.94805	0.000124559	0.00201841
				Unigene054734	-5.93999	0.000124813	0.0020196
				Unigene026197	-3.27218	0.000126044	0.00203642
				Unigene034450	2.16336	0.000126395	0.00203897
				Unigene015676	-5.93676	0.000126838	0.00204301
				Unigene030204	-5.93676	0.000126838	0.00204301
				Unigene053895	4.21214	0.000126982	0.00204378
				Unigene029876	1.83699	0.000127833	0.00205435
				Unigene029027	-4.10786	0.000128327	0.00206072
				Unigene035268	-1.35566	0.000129192	0.00207147
				Unigene038161	-1.34285	0.000129135	0.00207147
				Unigene022358	1.09887	0.000129976	0.00208247
				Unigene027865	1.23051	0.000132003	0.00211335
				Unigene038841	1.3551	0.000132114	0.00211353
				Unigene017777	-4.10444	0.000132706	0.00212139
				Unigene019732	2.10874	0.000133047	0.00212524
				Unigene012468	-1.69333	0.000134813	0.00215021
				Unigene024788	-2.73408	0.000135028	0.00215039
				Unigene027552	-1.339	0.000134944	0.00215039
				Unigene038722	1.41769	0.000135184	0.00215127
				Unigene041632	-2.76284	0.000139702	0.00221982
				Unigene049283	2.28614	0.00014001	0.00222306
				Unigene022054	-4.11461	0.00014119	0.00224011
				Unigene030411	-4.07793	0.000143208	0.00227043
				Unigene048043	1.98054	0.000143805	0.00227819
				Unigene009213	-5.88037	0.000144234	0.00228325
				Unigene034029	-2.36593	0.000144341	0.00228325
				Unigene028247	-1.26626	0.000144479	0.00228373
				Unigene037211	1.32225	0.000145146	0.00229258
				Unigene036285	1.37421	0.000145255	0.00229258
				Unigene028742	2.56473	0.000146051	0.00230172
				Unigene033440	2.95897	0.000145952	0.00230172
				Unigene017844	-2.66296	0.000147197	0.00231806
				Unigene025811	-5.2153	0.000147924	0.00232777
				Unigene033935	1.59123	0.00014875	0.00233903
				Unigene016688	2.58948	0.000149306	0.00234603
				Unigene022629	2.15191	0.000149585	0.00234868
				Unigene028184	-3.56495	0.000149846	0.00235102
				Unigene044274	-1.25946	0.000150445	0.00235868
				Unigene014457	-3.36447	0.000150719	0.00236123
				Unigene039488	-5.19684	0.000151957	0.00237887
				Unigene012513	-2.50827	0.000152425	0.00238443
				Unigene034987	-3.01423	0.000154253	0.00241125
				Unigene024274	-3.54952	0.000154596	0.00241482
				Unigene016810	-1.75084	0.000156244	0.00243817
				Unigene041738	-1.19238	0.000156321	0.00243817
				Unigene023915	1.09274	0.00015665	0.00244043
				Unigene037179	1.10671	0.000156811	0.00244043
				Unigene042224	-2.35288	0.000156715	0.00244043
				Unigene026399	1.20066	0.000157845	0.00245471
				Unigene023459	-2.42577	0.000160043	0.00248706
				Unigene009422	1.76426	0.000162592	0.00252297
				Unigene023192	1.19208	0.000162474	0.00252297
				Unigene021540	1.80119	0.000163014	0.00252627
				Unigene027516	2.59135	0.000163043	0.00252627
				Unigene008827	-5.82277	0.000163868	0.00253719
				Unigene012072	-5.82188	0.000164765	0.00254922
				Unigene028328	1.30452	0.000165423	0.00255753
				Unigene041384	-3.21324	0.000165711	0.00256012
				Unigene034232	-3.53644	0.000166099	0.00256424
				Unigene018517	-5.81825	0.000167589	0.0025816
				Unigene023095	-5.81825	0.000167589	0.0025816
				Unigene036182	-5.81825	0.000167589	0.0025816
				Unigene042407	-4.04086	0.000169647	0.0026114
				Unigene056832	1.636	0.000170435	0.00261783
				Unigene042935	1.56923	0.000170665	0.00261946
				Unigene040034	-2.99736	0.000171333	0.0026278
				Unigene018759	-5.81282	0.000172313	0.00263826
				Unigene019519	-5.81282	0.000172313	0.00263826
				Unigene030000	2.66622	0.000172388	0.00263826
				Unigene040489	2.06489	0.000175059	0.00267721
				Unigene043722	1.12215	0.00017619	0.00269255
				Unigene018794	1.13907	0.000178034	0.00271878
				Unigene034117	3.6055	0.000178964	0.00273101
				Unigene034336	1.09949	0.000180261	0.00274882
				Unigene059248	5.91421	0.000182106	0.00277496
				Unigene035747	-4.01374	0.000182695	0.00278193
				Unigene058213	2.90138	0.000184705	0.00281052
				Unigene020494	-5.12187	0.000186618	0.00283758
				Unigene039801	1.2786	0.00018885	0.00286946
				Unigene021372	1.02188	0.000195249	0.00296457
				Unigene024022	-5.097	0.000198511	0.00301193
				Unigene038733	-5.09658	0.000199263	0.00302119
				Unigene021636	1.03468	0.000200146	0.00303047
				Unigene040816	-3.98417	0.000200162	0.00303047
				Unigene021784	1.16864	0.000201655	0.00304871
				Unigene000292	-5.74597	0.000202716	0.00306257
				Unigene036964	4.06568	0.000204681	0.00309006
				Unigene040708	-1.18564	0.000207693	0.0031333
				Unigene019261	4.12907	0.000208227	0.00313911
				Unigene025056	-1.12409	0.000210646	0.00317333
				Unigene024729	-2.56399	0.000211481	0.00318138
				Unigene036466	-5.08536	0.000215466	0.00323672
				Unigene024355	-2.05318	0.000217622	0.00326679
				Unigene017789	-5.69561	0.000218486	0.00327744
				Unigene017221	-5.69423	0.000219799	0.00328783
				Unigene027214	-5.69458	0.000219743	0.00328783
				Unigene009931	1.42956	0.000223063	0.00333195
				Unigene025357	-5.69043	0.000223727	0.00333716
				Unigene027717	-1.22611	0.000223598	0.00333716
				Unigene011818	1.60449	0.000224726	0.0033497
				Unigene045208	-2.64157	0.000225246	0.00335508
				Unigene026853	-2.52773	0.000227978	0.0033934
				Unigene027900	-3.14744	0.000228788	0.00340147
				Unigene045875	-1.31767	0.000228842	0.00340147
				Unigene032335	-2.43748	0.000230877	0.00342932
				Unigene008651	5.76081	0.000238704	0.00354309
				Unigene038978	-2.7731	0.000240935	0.00357369
				Unigene016651	-2.77268	0.000242388	0.00359274
				Unigene014714	-2.1672	0.000243226	0.00360012
				Unigene038395	-1.23415	0.000243069	0.00360012
				Unigene020960	-1.47943	0.000245989	0.00363847
				Unigene049501	-3.42382	0.000252358	0.00372747
				Unigene022024	1.15393	0.000254489	0.00375633
				Unigene024504	1.38367	0.000255258	0.00376506
				Unigene026364	3.99069	0.000256881	0.00378636
				Unigene027312	-1.4629	0.000260636	0.00383637
				Unigene017380	-5.00604	0.000262856	0.00386232
				Unigene023036	-5.6202	0.000262946	0.00386232
				Unigene032607	1.19117	0.000262599	0.00386232
				Unigene037739	-4.98947	0.000263304	0.00386489
				Unigene027961	2.23366	0.000266655	0.00390596
				Unigene022594	1.4014	0.00026756	0.0039138
				Unigene032031	1.26552	0.000267546	0.0039138
				Unigene034838	1.31453	0.000268566	0.0039258
				Unigene027252	-2.41138	0.000271107	0.00395749
				Unigene027373	-2.41138	0.000271107	0.00395749
				Unigene028890	3.04288	0.000274229	0.0040003
				Unigene013936	-3.94221	0.000275739	0.0040168
				Unigene027749	-3.94221	0.000275739	0.0040168
				Unigene034871	1.31665	0.000276848	0.00403019
				Unigene030067	-2.10357	0.000280582	0.00408174
				Unigene032229	-3.40444	0.000284134	0.00412491
				Unigene039476	1.11578	0.000286502	0.00415359
				Unigene021108	2.43337	0.000287207	0.00416096
				Unigene018650	-3.88122	0.000287429	0.00416134
				Unigene010967	3.50927	0.000290599	0.00420436
				Unigene020106	-5.55755	0.000294509	0.00425802
				Unigene041590	-2.88034	0.000295313	0.00426382
				Unigene017746	4.06757	0.000297834	0.00429729
				Unigene034013	1.34044	0.000299511	0.00431854
				Unigene035322	-1.41216	0.000302312	0.00435596
				Unigene038938	-2.18423	0.000303965	0.0043768
				Unigene019386	2.81106	0.000304628	0.00438338
				Unigene059523	5.03284	0.000304936	0.00438482
				Unigene019586	1.87148	0.000305719	0.0043931
				Unigene016334	-4.93208	0.00030595	0.00439344
				Unigene044106	-2.24315	0.000307012	0.0044057
				Unigene037244	1.05894	0.000308774	0.00442799
				Unigene017041	2.46396	0.000310141	0.00444459
				Unigene017070	1.74059	0.000310962	0.00445333
				Unigene024616	1.01183	0.000313199	0.00448235
				Unigene024446	2.78694	0.000314085	0.00449198
				Unigene035170	2.78487	0.00031531	0.00450646
				Unigene024767	-2.02904	0.00031884	0.00455385
				Unigene034884	1.82672	0.00032153	0.00458917
				Unigene016689	3.00992	0.000323105	0.00460854
				Unigene022275	5.80464	0.000324343	0.00462309
				Unigene030249	-5.53394	0.000325226	0.00462945
				Unigene015178	-3.84507	0.000326446	0.00464368
				Unigene006085	3.46515	0.000335522	0.00476001
				Unigene020077	1.87664	0.000338387	0.00479743
				Unigene025351	1.94176	0.000343041	0.00486017
				Unigene014105	-5.48343	0.000343991	0.00486386
				Unigene035421	-5.48363	0.000343933	0.00486386
				Unigene042820	-5.48343	0.000343991	0.00486386
				Unigene030571	5.00197	0.000344347	0.00486565
				Unigene031419	-2.55887	0.000344878	0.00486991
				Unigene023738	-2.12892	0.000346371	0.00488773
				Unigene010889	-5.48077	0.00034828	0.00490409
				Unigene021426	-5.48018	0.000348456	0.00490409
				Unigene023270	-5.48077	0.00034828	0.00490409
				Unigene042108	-5.48018	0.000348456	0.00490409
				Unigene020054	2.66997	0.000354779	0.00498644
				Unigene047571	-2.21936	0.000355338	0.00499099
				Unigene026020	1.78803	0.000358018	0.00502197
				Unigene025948	-2.7441	0.000361429	0.00506646
				Unigene041674	-4.90127	0.000365297	0.0051173
				Unigene042020	-1.56557	0.000365808	0.00512107
				Unigene041614	1.95309	0.000368193	0.00514766
				Unigene032825	-1.21922	0.000369027	0.00515592
				Unigene016588	-3.04939	0.00037078	0.00517699
				Unigene026268	-1.81078	0.000372589	0.00519881
				Unigene038041	2.12182	0.000374525	0.00522239
				Unigene021733	-2.49533	0.000376412	0.00524525
				Unigene027035	-3.02026	0.000380677	0.0053012
				Unigene041998	-4.82524	0.000384684	0.00535348
				Unigene038078	-1.78026	0.000386485	0.00537501
				Unigene030943	2.20166	0.000387051	0.00537935
				Unigene038784	-2.81779	0.000388218	0.00539203
				Unigene020842	1.70547	0.000391264	0.00542367
				Unigene025773	-5.45081	0.000391162	0.00542367
				Unigene028718	1.09674	0.000390817	0.00542367
				Unigene033961	-1.59271	0.00039457	0.00546591
				Unigene044302	1.84875	0.000397389	0.00550137
				Unigene044960	-2.08984	0.000398132	0.00550806
				Unigene028829	-1.98459	0.00039955	0.00552407
				Unigene015763	1.21682	0.000400943	0.00553971
				Unigene032127	-1.28037	0.000401277	0.00554071
				Unigene024259	-3.77485	0.000404362	0.00556921
				Unigene027246	-5.40526	0.000404221	0.00556921
				Unigene029346	-3.77516	0.000404393	0.00556921
				Unigene032329	-5.40486	0.000404368	0.00556921
				Unigene037119	-4.81075	0.000413991	0.00568403
				Unigene038930	-4.81075	0.000413991	0.00568403
				Unigene041253	1.36819	0.000413385	0.00568403
				Unigene017845	-4.80915	0.000417716	0.00573034
				Unigene031239	2.60388	0.000419587	0.00575201
				Unigene020293	-4.80738	0.00042329	0.00579554
				Unigene012630	-5.39225	0.000425734	0.00582524
				Unigene032694	1.60553	0.000426311	0.00582936
				Unigene043815	-2.52367	0.000427116	0.0058366
				Unigene028656	-1.31193	0.000429989	0.00587208
				Unigene048305	-1.99134	0.000430632	0.00587707
				Unigene019110	1.48009	0.000434872	0.00593112
				Unigene001765	-4.79961	0.000440589	0.00600136
				Unigene032085	-2.98373	0.000444017	0.00604417
				Unigene023254	1.68778	0.000450881	0.00613367
				Unigene046616	-1.43868	0.000453173	0.00616089
				Unigene011128	-2.98131	0.000454619	0.00617658
				Unigene017274	1.20794	0.00045533	0.00618227
				Unigene023477	1.53853	0.00046491	0.00628838
				Unigene027082	-1.4363	0.000464326	0.00628838
				Unigene035871	1.15317	0.000464926	0.00628838
				Unigene042193	-1.6209	0.000464441	0.00628838
				Unigene012403	5.43032	0.000468694	0.0063353
				Unigene025507	-2.2328	0.000470702	0.00635838
				Unigene008826	-5.32505	0.00047209	0.006369
				Unigene016019	-5.32526	0.000471997	0.006369
				Unigene036612	1.41086	0.000473626	0.00638566
				Unigene021918	-1.86578	0.000475084	0.00640125
				Unigene031797	-1.11055	0.000475723	0.00640578
				Unigene042096	-1.03129	0.0004761	0.00640678
				Unigene018762	1.00966	0.00047712	0.00641643
				Unigene031190	-2.06801	0.000484723	0.00651455
				Unigene001450	3.39594	0.000486855	0.00653905
				Unigene000800	5.50036	0.000497935	0.00668363
				Unigene016213	4.84476	0.000499025	0.00669025
				Unigene043613	-1.26181	0.00049906	0.00669025
				Unigene029916	1.00243	0.000499395	0.0066905
				Unigene019298	-2.32232	0.00050036	0.00669919
				Unigene046005	-2.04801	0.000501643	0.00671213
				Unigene043997	1.19146	0.000513474	0.00685453
				Unigene045792	-1.35337	0.000513904	0.00685453
				Unigene048643	-1.57402	0.000513685	0.00685453
				Unigene022416	-1.06469	0.000523804	0.00698219
				Unigene016720	1.57252	0.000525032	0.00699235
				Unigene021167	5.43027	0.000525557	0.00699235
				Unigene023652	-1.87921	0.00052544	0.00699235
				Unigene039827	-4.71262	0.000526571	0.00700144
				Unigene017463	-3.71453	0.000534499	0.0070988
				Unigene039226	1.66861	0.000542668	0.00720191
				Unigene039560	-1.15239	0.000546584	0.00724934
				Unigene028248	1.2088	0.000547211	0.00725312
				Unigene044662	-3.22296	0.00055055	0.00729281
				Unigene015060	1.24046	0.000554204	0.00733662
				Unigene029435	-5.23993	0.000554698	0.00733858
				Unigene026318	-5.23819	0.000558439	0.00738346
				Unigene039397	-2.45834	0.000559378	0.00739126
				Unigene017676	1.08945	0.000560866	0.0074063
				Unigene040815	-2.1389	0.000562251	0.00741996
				Unigene026658	1.41009	0.000562902	0.00742393
				Unigene022587	1.98379	0.000567009	0.00747344
				Unigene017185	-1.19752	0.00056824	0.0074815
				Unigene042496	-2.5911	0.000568681	0.0074815
				Unigene043262	1.26847	0.000568635	0.0074815
				Unigene029704	-5.23256	0.000570045	0.00749479
				Unigene036808	-2.2718	0.000571918	0.00751476
				Unigene019309	3.73814	0.000574121	0.00753903
				Unigene024881	1.79212	0.000575053	0.00754341
				Unigene029350	-3.66043	0.000575166	0.00754341
				Unigene029236	1.14789	0.000576416	0.00755512
				Unigene032058	-1.74298	0.000577487	0.00756447
				Unigene019400	1.22532	0.000579836	0.00758586
				Unigene041951	-3.65719	0.00058536	0.0076534
				Unigene018757	-1.89894	0.00059333	0.00775282
				Unigene041145	1.53932	0.000595776	0.00777998
				Unigene044331	1.24408	0.000597633	0.00779943
				Unigene040690	-2.7157	0.000599841	0.00782342
				Unigene031950	-1.61398	0.000602723	0.00785133
				Unigene031819	-1.64279	0.000605092	0.00787251
				Unigene013819	-3.20978	0.000606211	0.0078774
				Unigene042155	-1.18542	0.000608535	0.00790274
				Unigene041176	-2.71381	0.000611066	0.00793075
				Unigene027724	-2.12283	0.000614039	0.00796445
				Unigene028383	-2.18121	0.000620555	0.00803913
				Unigene016650	-3.64716	0.000623457	0.00807179
				Unigene022190	1.02941	0.000629011	0.00813375
				Unigene011525	2.99261	0.00063073	0.00815101
				Unigene025723	-1.31522	0.000633485	0.00817663
				Unigene041147	-2.27359	0.000642149	0.00828341
				Unigene023797	-1.69271	0.00064462	0.00830516
				Unigene036589	-2.55222	0.000644309	0.00830516
				Unigene045335	-3.16678	0.0006452	0.00830759
				Unigene020609	-1.27908	0.000648604	0.00834127
				Unigene027849	1.09806	0.000649918	0.0083531
				Unigene013564	-5.1492	0.00065622	0.00841051
				Unigene028150	-5.14896	0.00065637	0.00841051
				Unigene028749	-5.14896	0.00065637	0.00841051
				Unigene034434	-2.02019	0.000655628	0.00841051
				Unigene051679	-5.14896	0.00065637	0.00841051
				Unigene039420	3.68688	0.000664708	0.00851219
				Unigene015272	-5.14497	0.000665502	0.00851722
				Unigene030876	-5.14424	0.000665963	0.00851797
				Unigene005475	3.72969	0.000667586	0.00853358
				Unigene038039	-2.11107	0.000668835	0.00854439
				Unigene020880	-4.6088	0.000670082	0.00855
				Unigene041672	-4.64559	0.000669849	0.00855
				Unigene044656	-3.61352	0.000670772	0.00855365
				Unigene046322	1.32948	0.000675407	0.0086024
				Unigene020575	-4.60678	0.000676802	0.00861498
				Unigene001049	3.6929	0.000683636	0.00869153
				Unigene050119	3.6929	0.000683636	0.00869153
				Unigene025932	1.91191	0.000685025	0.00870397
				Unigene038061	-5.13531	0.000685454	0.00870419
				Unigene034000	2.51731	0.000688797	0.00874141
				Unigene046074	-1.90602	0.000694057	0.00880288
				Unigene021169	5.23288	0.000698673	0.0088558
				Unigene021516	-1.99332	0.00069926	0.0088558
				Unigene034296	-1.24028	0.000699483	0.0088558
				Unigene028643	-1.38471	0.000704162	0.00890971
				Unigene014171	2.32892	0.000707636	0.00893765
				Unigene034746	-2.15534	0.000706814	0.00893765
				Unigene015134	3.68713	0.000716253	0.00903033
				Unigene017030	1.20308	0.000716003	0.00903033
				Unigene054324	4.71947	0.000717884	0.00904551
				Unigene025206	2.17049	0.000721443	0.00908495
				Unigene015898	1.11639	0.00072192	0.00908556
				Unigene044442	1.82189	0.000723018	0.00909397
				Unigene042021	-2.66562	0.000723488	0.00909448
				Unigene021269	-4.5726	0.000726433	0.00912045
				Unigene021606	2.11067	0.000726846	0.00912045
				Unigene036390	-4.5726	0.000726433	0.00912045
				Unigene024617	1.23966	0.00072747	0.00912287
				Unigene027209	-1.08018	0.000728449	0.00912484
				Unigene041043	-3.57849	0.000728488	0.00912484
				Unigene029456	2.64091	0.000729749	0.00913523
				Unigene017917	1.31996	0.00073435	0.00917655
				Unigene024115	-1.45574	0.000735444	0.00918481
				Unigene028204	-1.76208	0.000743389	0.00927183
				Unigene032363	-1.9405	0.000743725	0.00927183
				Unigene046241	1.63077	0.000745223	0.00928504
				Unigene015662	1.35337	0.000750793	0.00934894
				Unigene038498	1.96983	0.000752209	0.00936107
				Unigene017794	1.26052	0.000752664	0.00936123
				Unigene043036	-1.40469	0.00075745	0.00941523
				Unigene038213	-1.30304	0.000758898	0.0094277
				Unigene018985	3.64056	0.000769694	0.00955621
				Unigene020380	2.05808	0.00077141	0.0095719
				Unigene015675	5.31917	0.000775397	0.00961011
				Unigene022458	-5.05367	0.000776435	0.00961173
				Unigene026111	-5.05367	0.000776435	0.00961173
				Unigene018475	-5.05092	0.00078236	0.00966813
				Unigene022448	-5.05092	0.00078236	0.00966813
				Unigene035999	-5.05142	0.000781974	0.00966813
				Unigene008344	3.7042	0.000786735	0.00971086
				Unigene044554	-2.83399	0.000786442	0.00971086
				Unigene024442	-4.5535	0.000793151	0.00978158
				Unigene031479	-4.53429	0.000793388	0.00978158
				Unigene018504	-5.04332	0.000800011	0.00985176
				Unigene022433	-2.21073	0.000799624	0.00985176
				Unigene048211	1.39288	0.000800607	0.00985337
				Unigene044500	5.12071	0.000806721	0.00992285
				Unigene053745	5.11382	0.000812894	0.00999298
				Unigene018394	1.19984	0.000813623	0.00999365
				Unigene032823	1.15729	0.000813892	0.00999365
