# Supplementary material for: Integrated metabolome and transcriptome revealed the flavonoid biosynthetic pathway in developing Vernonia amygdalina leaves
Source: PeerJ. 2021 Apr 26;9:e11239. doi: 10.7717/peerj.11239 (PMC8083182; doi:10.7717/peerj.11239)
Supplement: Supplemental Information 9 [file peerj-09-11239-s009.xlsx]

## Sheet: Sheet1
Supplementary Table S6 The genes are involved in material supplying and flavonoid scaffold biosynthesis.
Gene designation	ID	Length	10DAG TPM	20DAG TPM	30DAG TPM	TAIR_ID	TAIR_annotation	Nr.ID	Nr.annotation	Swissprot.ID	Swissprot.annotation	Pathway	K_ID
Va-PAL2	Unigene043150	1606	199.262	78.7689	45.3477	AT2G37040.1	PHE ammonia lyase 1|Chr2:15557602-15560237 REVERSE LENGTH=725	AAO13347.1	phenylalanine ammonia-lyase2 [Lactuca sativa]	sp|O04058|PALY_HELAN	Phenylalanine ammonia-lyase OS=Helianthus annuus GN=PAL PE=2 SV=2	ko00940//Phenylpropanoid biosynthesis;ko00360//Phenylalanine metabolism	K10775
Va-PAL1	Unigene043151	1275	1805.44	740.625	572.549	AT2G37040.1	PHE ammonia lyase 1|Chr2:15557602-15560237 REVERSE LENGTH=725	AAL55242.1	phenylalanine ammonia-lyase [Lactuca sativa]	sp|O04058|PALY_HELAN	Phenylalanine ammonia-lyase OS=Helianthus annuus GN=PAL PE=2 SV=2	ko00940//Phenylpropanoid biosynthesis;ko00360//Phenylalanine metabolism	K10775
Va-PAL4	Unigene027086	1003	2114.87	1220.28	819.528	AT3G53260.1	phenylalanine ammonia-lyase 2|Chr3:19744256-19746619 REVERSE LENGTH=717	CAL91038.1	phenylalanine ammonia-lyase 4, partial [Cynara cardunculus var. scolymus]	sp|O23865|PAL1_DAUCA	Phenylalanine ammonia-lyase 1 OS=Daucus carota GN=PAL1 PE=3 SV=1	ko00940//Phenylpropanoid biosynthesis;ko00360//Phenylalanine metabolism	K10775
Va-C4H1	Unigene031793	1874	575.942	218.012	171.581	AT2G30490.1	cinnamate-4-hydroxylase|Chr2:12993861-12995683 REVERSE LENGTH=505	KVH94141.1	cytochrome P450 [Cynara cardunculus var. scolymus]	sp|Q04468|TCMO_HELTU	Trans-cinnamate 4-monooxygenase OS=Helianthus tuberosus GN=CYP73A1 PE=1 SV=1	ko00940//Phenylpropanoid biosynthesis;ko00360//Phenylalanine metabolism;ko00130//Ubiquinone and other terpenoid-quinone biosynthesis;ko00941//Flavonoid biosynthesis;ko00945//Stilbenoid, diarylheptanoid and gingerol biosynthesis;ko01220//Degradation of aromatic compounds	K00487
Va-C4H2	Unigene031795	1786	130.055	51.5988	9.50853	AT2G30490.1	cinnamate-4-hydroxylase|Chr2:12993861-12995683 REVERSE LENGTH=505	KVH94141.1	cytochrome P450 [Cynara cardunculus var. scolymus]	sp|Q04468|TCMO_HELTU	Trans-cinnamate 4-monooxygenase OS=Helianthus tuberosus GN=CYP73A1 PE=1 SV=1	ko00940//Phenylpropanoid biosynthesis;ko00360//Phenylalanine metabolism;ko00130//Ubiquinone and other terpenoid-quinone biosynthesis;ko00941//Flavonoid biosynthesis;ko00945//Stilbenoid, diarylheptanoid and gingerol biosynthesis;ko01220//Degradation of aromatic compounds	K00487
Va-4CL4	Unigene035578	1973	7.41871	3.43072	2.70096	AT3G21230.1	4-coumarate:CoA ligase 4 | Chr3:7448231-7451947 REVERSE LENGTH=570	KVH91651.1	AMP-binding, conserved site-containing protein [Cynara cardunculus var. scolymus]	sp|Q84P24|4CLL6_ARATH	4-coumarate--CoA ligase-like 6 OS=Arabidopsis thaliana GN=4CLL6 PE=2 SV=2	ko00940//Phenylpropanoid biosynthesis;ko00360//Phenylalanine metabolism;ko00130//Ubiquinone and other terpenoid-quinone biosynthesis	K01904
Va-4CL2	Unigene036393	2316	8.98314	39.9245	53.2741	AT3G21240.1	4-coumarate:CoA ligase 2 | Chr3:7454497-7457314 REVERSE LENGTH=556	KVH90732.1	AMP-binding, conserved site-containing protein [Cynara cardunculus var. scolymus]	sp|Q9M0X9|4CLL7_ARATH	4-coumarate--CoA ligase-like 7 OS=Arabidopsis thaliana GN=4CLL7 PE=1 SV=1	ko00940//Phenylpropanoid biosynthesis;ko00360//Phenylalanine metabolism;ko00130//Ubiquinone and other terpenoid-quinone biosynthesis	K01904
Va-4CL3	Unigene037914	2054	167.843	230.277	73.1381	AT1G65060.1	4-coumarate:CoA ligase 3 | Chr1:24167385-24171457 REVERSE LENGTH=561	KVI06105.1	AMP-binding, conserved site-containing protein [Cynara cardunculus var. scolymus]	sp|O24145|4CL1_TOBAC	4-coumarate--CoA ligase 1 OS=Nicotiana tabacum GN=4CL1 PE=2 SV=1	ko00940//Phenylpropanoid biosynthesis;ko00360//Phenylalanine metabolism;ko00130//Ubiquinone and other terpenoid-quinone biosynthesis	K01904
Va-4CL1	Unigene039700	1908	11.9118	11.7564	14.0096	AT1G51680.1	4-coumarate:CoA ligase 1 | Chr1:19159007-19161464 REVERSE LENGTH=561	XP_009786809.1	PREDICTED: 4-coumarate--CoA ligase-like 7 [Nicotiana sylvestris]	sp|Q9M0X9|4CLL7_ARATH	4-coumarate--CoA ligase-like 7 OS=Arabidopsis thaliana GN=4CLL7 PE=1 SV=1	ko00940//Phenylpropanoid biosynthesis;ko00360//Phenylalanine metabolism;ko00130//Ubiquinone and other terpenoid-quinone biosynthesis	K01904
Va-ACLα3	Unigene037241	2039	45.1814	24.9129	21.3533	AT1G09430.1	ATP-citrate lyase A-3|Chr1:3042135-3044978 FORWARD LENGTH=424	XP_015874770.1	PREDICTED: ATP-citrate synthase alpha chain protein 2 [Ziziphus jujuba]	sp|Q2QZ86|ACLA2_ORYSJ	ATP-citrate synthase alpha chain protein 2 OS=Oryza sativa subsp. japonica GN=ACLA-2 PE=2 SV=2	ko00020//Citrate cycle (TCA cycle)	K01648
Va-ACLα1	Unigene039032	1512	103.552	58.1265	47.4471	AT1G10670.4	ATP-citrate lyase A-1|Chr1:3535787-3538098 FORWARD LENGTH=423	KVH97799.1	ATP-grasp fold, subdomain 2 [Cynara cardunculus var. scolymus]	sp|Q9SGY2|ACLA1_ARATH	ATP-citrate synthase alpha chain protein 1 OS=Arabidopsis thaliana GN=ACLA-1 PE=1 SV=1	ko00020//Citrate cycle (TCA cycle)	K01648
Va-ACLα2	Unigene053866	1634	0	1.40933	3.92355	AT1G60810.2	ATP-citrate lyase A-2|Chr1:22388691-22390993 REVERSE LENGTH=423	XP_014535725.1	ATP citrate lyase subunit (Acl), putatibe [Penicillium digitatum Pd1]// XP_014535725.1 ATP citrate lyase subunit (Acl), putatibe [Penicillium digitatum Pd1]// EKV15818.1 ATP citrate lyase subunit (Acl), putatibe [Penicillium digitatum Pd1]	sp|O13907|ACL2_SCHPO	Probable ATP-citrate synthase subunit 2 OS=Schizosaccharomyces pombe (strain 972 / ATCC 24843) GN=SPAC22A12.16 PE=1 SV=1	ko00020//Citrate cycle (TCA cycle)	K01648
Va-ACLβ2	Unigene045792	4062	84.094	40.2124	23.9225	AT5G49460.2	ATP citrate lyase subunit B 2|Chr5:20055048-20058195 FORWARD LENGTH=608	XP_015574748.1	PREDICTED: ATP-citrate synthase beta chain protein 2 [Ricinus communis]// XP_015574749.1 PREDICTED: ATP-citrate synthase beta chain protein 2 [Ricinus communis]	sp|Q9FGX1|ACLB2_ARATH	ATP-citrate synthase beta chain protein 2 OS=Arabidopsis thaliana GN=ACLB-2 PE=1 SV=1	ko00020//Citrate cycle (TCA cycle)	K01648
Va-ACC1	Unigene048181	7358	55.4567	25.8677	21.8499	AT1G36160.2	acetyl-CoA carboxylase 1|Chr1:13534196-13543773 FORWARD LENGTH=2254	KVI07315.1	Acetyl-CoA carboxylase, central domain-containing protein [Cynara cardunculus var. scolymus]	sp|Q38970|ACC1_ARATH	Acetyl-CoA carboxylase 1 OS=Arabidopsis thaliana GN=ACC1 PE=1 SV=1	ko01212//Fatty acid metabolism;ko00620//Pyruvate metabolism;ko00061//Fatty acid biosynthesis;ko00640//Propanoate metabolism	K11262
Va-CHS1	Unigene021123	1451	145.227	6.54252	9.37496	AT5G13930.1	Chalcone and stilbene synthase family protein|Chr5:4488762-4490035 FORWARD LENGTH=395	AHN85848.1	chalcone synthase [Eschenbachia blinii]	sp|P48385|CHSY_CALCH	Chalcone synthase OS=Callistephus chinensis GN=CHS PE=2 SV=2	ko04712//Circadian rhythm - plant;ko00941//Flavonoid biosynthesis	K00660
Va-CHS3	Unigene032526	1339	17.4965	1.0129	0.194092	AT5G13930.1	Chalcone and stilbene synthase family protein|Chr5:4488762-4490035 FORWARD LENGTH=395	KVI02820.1	Chalcone/stilbene synthase, active site-containing protein [Cynara cardunculus var. scolymus]	sp|P48392|CHS3_GERHY	Chalcone synthase 3 OS=Gerbera hybrida GN=CHS3 PE=2 SV=1	ko04712//Circadian rhythm - plant;ko00941//Flavonoid biosynthesis	K00660
Va-CHI	Unigene030870	2370	22.2773	8.36631	6.52573	AT3G55120.1	Chalcone-flavanone isomerase family protein|Chr3:20430248-20431415 REVERSE LENGTH=246	Q8LKP9.1	RecName: Full=Chalcone--flavonone isomerase; Short=Chalcone isomerase// AAM48130.1 chalcone isomerase [Saussurea medusa]	sp|Q8LKP9|CFI_SAUME	Chalcone-flavonone isomerase OS=Saussurea medusa GN=CHI PE=2 SV=1	ko00941//Flavonoid biosynthesis	K01859
Va-FNSII	Unigene025723	1738	83.5275	21.878	24.2037	AT5G06900.1	Cytochrome P450%2C family 93%2C subfamily D%2C polypeptide 1|Chr5:2136160-2137925 REVERSE LENGTH=507	ACB56919.1	flavone synthase II [Pilosella officinarum]	sp|P93149|C93B1_GLYEC	Licodione synthase OS=Glycyrrhiza echinata GN=CYP93B1 PE=1 SV=2	ko00941//Flavonoid biosynthesis	K13077
Va-IFS1	Unigene006274	1519	0.0829476	2.24002	3.45083	AT5G06900.1	Cytochrome P450%2C family 93%2C subfamily D%2C polypeptide 1|Chr5:2136160-2137925 REVERSE LENGTH=508	KVH94728.1	cytochrome P450 [Cynara cardunculus var. scolymus]	sp|Q42798|C93A1_SOYBN	3,9-dihydroxypterocarpan 6A-monooxygenase OS=Glycine max GN=CYP93A1 PE=1 SV=1	ko00943//Isoflavonoid biosynthesis	K13257
Va-IFS2	Unigene016535	1611	11.7489	0	0	AT5G06900.1	Cytochrome P450%2C family 93%2C subfamily D%2C polypeptide 1|Chr5:2136160-2137925 REVERSE LENGTH=509	KVH94728.1	cytochrome P450 [Cynara cardunculus var. scolymus]	sp|Q42798|C93A1_SOYBN	3,9-dihydroxypterocarpan 6A-monooxygenase OS=Glycine max GN=CYP93A1 PE=1 SV=1	ko00943//Isoflavonoid biosynthesis	K13258
Va-IFS3	Unigene026889	1981	2.65041	10.8894	17.036	AT5G06900.1	Cytochrome P450%2C family 93%2C subfamily D%2C polypeptide 1|Chr5:2136160-2137925 REVERSE LENGTH=510	KVH94728.1	cytochrome P450 [Cynara cardunculus var. scolymus]	sp|Q9XHC6|C93E1_SOYBN	Beta-amyrin 24-hydroxylase OS=Glycine max GN=CYP93E1 PE=1 SV=1	ko00943//Isoflavonoid biosynthesis	K13259
Va-F3H	Unigene050425	1151	3.60952	0.119276	0	AT3G51240.1	Flavanone 3-hydroxylase|Chr3:19025409-19026658 FORWARD LENGTH=358	AKN79608.1	flavanone 3-hydroxylase [Erigeron breviscapus]	sp|Q05963|FL3H_CALCH	Naringenin,2-oxoglutarate 3-dioxygenase OS=Callistephus chinensis GN=FHT PE=2 SV=1	ko00941//Flavonoid biosynthesis	K00475
Va-FLS1	Unigene014590	1303	8.57428	17.8714	0.598362	AT5G08640.1	flavonol synthase 1| Chr5:2804009-2805175 FORWARD LENGTH=336	KVI07025.1	Isopenicillin N synthase [Cynara cardunculus var. scolymus]	sp|Q39224|SRG1_ARATH	Protein SRG1 OS=Arabidopsis thaliana GN=SRG1 PE=2 SV=1	ko00941//Flavonoid biosynthesis	K05278
Va-FLS2	Unigene015982	1316	21.6381	45.276	0.526735	AT5G08640.1	flavonol synthase 1| Chr5:2804009-2805175 FORWARD LENGTH=337	KVI04852.1	Isopenicillin N synthase [Cynara cardunculus var. scolymus]	sp|D4N501|DIOX2_PAPSO	Probable 2-oxoglutarate/Fe(II)-dependent dioxygenase OS=Papaver somniferum GN=DIOX2 PE=2 SV=1	ko00941//Flavonoid biosynthesis	K05278
Va-FLS3	Unigene024442	1152	26.5408	13.0565	0.225674	AT5G08640.1	flavonol synthase 1| Chr5:2804009-2805175 FORWARD LENGTH=338	KVH91742.1	Non-heme dioxygenase N-terminal domain-containing protein [Cynara cardunculus var. scolymus]	sp|Q9ZSA7|DLO2_ARATH	Protein DMR6-LIKE OXYGENASE 2 OS=Arabidopsis thaliana GN=DLO2 PE=2 SV=1	ko00941//Flavonoid biosynthesis	K05278
Va-F3'5'H	Unigene026557	2119	48.0181	9.87869	10.9375	AT5G07990.1	Cytochrome P450 superfamily protein|Chr5:2560437-2562859 FORWARD LENGTH=513	ACN65825.1	flavonoid 3'-hydroxylase [Cichorium intybus]	sp|Q9SD85|F3PH_ARATH	Flavonoid 3'-monooxygenase OS=Arabidopsis thaliana GN=CYP75B1 PE=1 SV=1	ko00941//Flavonoid biosynthesis;ko00944//Flavone and flavonol biosynthesis	K05280
