# Supplementary material for: Integrated metabolome and transcriptome revealed the flavonoid biosynthetic pathway in developing Vernonia amygdalina leaves
Source: PeerJ. 2021 Apr 26;9:e11239. doi: 10.7717/peerj.11239 (PMC8083182; doi:10.7717/peerj.11239)
Supplement: Supplemental Information 10 [file peerj-09-11239-s010.xlsx]

## Sheet: Sheet1
Supplementary Table S7 The genes are involved in flavonoid modifications.
ID	Length	Name	10DAG FPKM	20DAG FPKM	30DAG FPKM	tair_id	tair_annotation	Nr.ID	Nr.annotation	Swissprot.ID	Swissprot.annotation	KOG.Protein.or.Domain	KOG.ID	KOG.Function.Description	KO.ID	KEGG.Gene	GO.BiologicalProcess	GO.MolecularFunction	GO.CellularComponent
Unigene000883	1621	FGT-like1	3.5062	8.838	19.5371	AT2G22590.1	UDP-Glycosyltransferase superfamily protein|Chr2:9593012-9594424 FORWARD LENGTH=470	XP_019262060.1	PREDICTED: UDP-glycosyltransferase 91A1-like [Nicotiana attenuata]// OIT38067.1 udp-glycosyltransferase 91a1 [Nicotiana attenuata]	sp|Q940V3|U91A1_ARATH	UDP-glycosyltransferase 91A1 OS=Arabidopsis thaliana GN=UGT91A1 PE=2 SV=1	At2g22590	KOG1192	UDP-glucuronosyl and UDP-glucosyl transferase	--	--	-	-	-
Unigene002192	1488	FGT-like2	6.48948	4.11061	2.96963	AT4G34131.1	UDP-glucosyl transferase 73B3|Chr4:16343268-16344713 REVERSE LENGTH=481	KVH93295.1	UDP-glucuronosyl/UDP-glucosyltransferase, partial [Cynara cardunculus var. scolymus]	sp|Q9AT54|SCGT_TOBAC	Scopoletin glucosyltransferase OS=Nicotiana tabacum GN=TOGT1 PE=1 SV=1	At2g15480	KOG1192	UDP-glucuronosyl and UDP-glucosyl transferase	--	--	-	-	-
Unigene007839	1537	FGT-like3	43.7176	162.04	40.8429	AT3G21760.1	UDP-Glycosyltransferase superfamily protein|Chr3:7667099-7668556 FORWARD LENGTH=485	Q6VAB2.1	RecName: Full=UDP-glycosyltransferase 71E1// AAR06914.1 UDP-glycosyltransferase 71E1 [Stevia rebaudiana]	sp|Q6VAB2|U71E1_STERE	UDP-glycosyltransferase 71E1 OS=Stevia rebaudiana GN=UGT71E1 PE=2 SV=1	At3g21760	KOG1192	UDP-glucuronosyl and UDP-glucosyl transferase	--	--	-	-	-
Unigene010018	1373	FGT-like4	0.925	0.65	0.75	AT2G22590.1	UDP-Glycosyltransferase superfamily protein|Chr2:9593012-9594424 FORWARD LENGTH=470	KVI08654.1	UDP-glucuronosyl/UDP-glucosyltransferase [Cynara cardunculus var. scolymus]	sp|Q6VAA8|U91D1_STERE	UDP-glycosyltransferase 91D1 OS=Stevia rebaudiana GN=UGT91D1 PE=2 SV=1	At2g22590	KOG1192	UDP-glucuronosyl and UDP-glucosyl transferase	--	--	-	-	-
Unigene010019	1550	FGT-like5	4.84337	0.585827	0.0838635	AT3G11340.1	UDP-Glycosyltransferase superfamily protein|Chr3:3556728-3558149 FORWARD LENGTH=447	KVI09874.1	UDP-glucuronosyl/UDP-glucosyltransferase [Cynara cardunculus var. scolymus]	sp|Q6VAB4|U76G1_STERE	UDP-glycosyltransferase 76G1 OS=Stevia rebaudiana GN=UGT76G1 PE=1 SV=1	At5g05880	KOG1192	UDP-glucuronosyl and UDP-glucosyl transferase	--	--	-	-	-
Unigene012465	1575	FGT-like6	512.528	106.808	159.21	AT3G16520.3	UDP-glucosyl transferase 88A1|Chr3:5619355-5620833 REVERSE LENGTH=462	ANW09830.1	UDP-glycosyltransferase 1 [Carthamus tinctorius]	sp|Q6VAA7|U88B1_STERE	UDP-glycosyltransferase 88B1 OS=Stevia rebaudiana GN=UGT88B1 PE=2 SV=1	At3g16520	KOG1192	UDP-glucuronosyl and UDP-glucosyl transferase	--	--	-	GO:0003824//catalytic activity;GO:0016740//transferase activity	-
Unigene013508	1389	FGT-like7	4.55248	0.784996	0.0311947	AT2G16890.2	UDP-Glycosyltransferase superfamily protein|Chr2:7316938-7319022 FORWARD LENGTH=478	KVI09181.1	UDP-glucuronosyl/UDP-glucosyltransferase [Cynara cardunculus var. scolymus]	sp|Q9ZVX4|U90A1_ARATH	UDP-glycosyltransferase 90A1 OS=Arabidopsis thaliana GN=UGT90A1 PE=2 SV=1	At2g16890	KOG1192	UDP-glucuronosyl and UDP-glucosyl transferase	--	--	-	-	-
Unigene014304	1722	FGT-like8	60.4983	15.8995	19.4975	AT2G36780.1	UDP-Glycosyltransferase superfamily protein|Chr2:15417618-15419108 REVERSE LENGTH=496	KVH99933.1	UDP-glucuronosyl/UDP-glucosyltransferase [Cynara cardunculus var. scolymus]	sp|Q9ZQ96|U73C3_ARATH	UDP-glycosyltransferase 73C3 OS=Arabidopsis thaliana GN=UGT73C3 PE=2 SV=1	At2g36780	KOG1192	UDP-glucuronosyl and UDP-glucosyl transferase	K13496//UDP-glucosyl transferase 73C [EC:2.4.1.-]	vvi:100246902	-	GO:0003824//catalytic activity;GO:0016740//transferase activity;GO:0016757//transferase activity, transferring glycosyl groups	-
Unigene019388	1768	FGT-like9	2.40035	2.58446	2.49938	AT3G16520.3	UDP-glucosyl transferase 88A1|Chr3:5619355-5620833 REVERSE LENGTH=462	ACB56924.1	glycosyltransferase UGT88A8 [Pilosella officinarum]	sp|Q6VAA7|U88B1_STERE	UDP-glycosyltransferase 88B1 OS=Stevia rebaudiana GN=UGT88B1 PE=2 SV=1	At3g16520	KOG1192	UDP-glucuronosyl and UDP-glucosyl transferase	--	--	-	-	-
Unigene020576	1636	FGT-like10	25.7689	48.2651	52.4322	AT1G22360.1	UDP-glucosyl transferase 85A2|Chr1:7895068-7897527 REVERSE LENGTH=481	KVH50258.1	UDP-glucuronosyl/UDP-glucosyltransferase [Cynara cardunculus var. scolymus]	sp|F8WKW1|UGT2_GARJA	7-deoxyloganetin glucosyltransferase OS=Gardenia jasminoides GN=UGT85A24 PE=1 SV=1	At1g22360	KOG1192	UDP-glucuronosyl and UDP-glucosyl transferase	--	--	-	GO:0003824//catalytic activity;GO:0016757//transferase activity, transferring glycosyl groups;GO:0016740//transferase activity	-
Unigene021344	1603	FGT-like11	35.8643	19.9244	27.4856	AT2G23260.1	UDP-glucosyl transferase 84B1|Chr2:9900046-9901416 REVERSE LENGTH=456	KVH93314.1	UDP-glucuronosyl/UDP-glucosyltransferase [Cynara cardunculus var. scolymus]	sp|O22182|U84B1_ARATH	UDP-glycosyltransferase 84B1 OS=Arabidopsis thaliana GN=UGT84B1 PE=2 SV=1	At2g23260	KOG1192	UDP-glucuronosyl and UDP-glucosyl transferase	K13692//UDP-glucose:(indol-3-yl)acetate beta-D-glucosyltransferase [EC:2.4.1.121]	vvi:100252177	-	GO:0016740//transferase activity;GO:0003824//catalytic activity	-
Unigene021742	1530	FGT-like12	5.98325	0.769172	0.622923	AT2G16890.2	UDP-Glycosyltransferase superfamily protein|Chr2:7316938-7319022 FORWARD LENGTH=478	ACB56926.1	glycosyltransferase UGT90A7 [Pilosella officinarum]	sp|Q9ZVX4|U90A1_ARATH	UDP-glycosyltransferase 90A1 OS=Arabidopsis thaliana GN=UGT90A1 PE=2 SV=1	At2g16890	KOG1192	UDP-glucuronosyl and UDP-glucosyl transferase	--	--	-	-	-
Unigene023459	1685	FGT-like13	40.8094	2.96176	4.24242	AT1G24100.1	UDP-glucosyl transferase 74B1|Chr1:8525547-8527010 REVERSE LENGTH=460	KVH96080.1	UDP-glucuronosyl/UDP-glucosyltransferase [Cynara cardunculus var. scolymus]	sp|O48676|U74B1_ARATH	UDP-glycosyltransferase 74B1 OS=Arabidopsis thaliana GN=UGT74B1 PE=1 SV=1	At1g24100	KOG1192	UDP-glucuronosyl and UDP-glucosyl transferase	K11820//N-hydroxythioamide S-beta-glucosyltransferase [EC:2.4.1.195]	tcc:TCM_010198	GO:0006950//response to stress;GO:0071704//organic substance metabolic process;GO:0019757//glycosinolate metabolic process;GO:0044699//single-organism process;GO:0006790//sulfur compound metabolic process;GO:0044711//single-organism biosynthetic process;GO:0051707//response to other organism;GO:0044281//small molecule metabolic process;GO:0043207//response to external biotic stimulus;GO:0019758//…	GO:0016740//transferase activity;GO:0003824//catalytic activity;GO:0035251//UDP-glucosyltransferase activity;GO:0046527//glucosyltransferase activity;GO:0016758//transferase activity, transferring hexosyl groups;GO:0016757//transferase activity, transferring glycosyl groups;GO:0008194//UDP-glycosyltransferase activity	-
Unigene024075	1623	FGT-like14	24.4444	43.6939	101.006	AT1G22380.1	UDP-glucosyl transferase 85A3|Chr1:7900522-7902332 REVERSE LENGTH=488	KVF86493.1	UDP-glucuronosyl/UDP-glucosyltransferase [Cynara cardunculus var. scolymus]	sp|U3U992|UGT8_CATRO	7-deoxyloganetic acid glucosyltransferase OS=Catharanthus roseus GN=UGT709C2 PE=1 SV=1	At1g22360	KOG1192	UDP-glucuronosyl and UDP-glucosyl transferase	--	--	-	-	-
Unigene024486	1523	FGT-like15	3.99552	7.19881	10.0702	AT1G22360.1	UDP-glucosyl transferase 85A2|Chr1:7895068-7897527 REVERSE LENGTH=481	KVH87569.1	UDP-glucuronosyl/UDP-glucosyltransferase [Cynara cardunculus var. scolymus]	sp|U3U992|UGT8_CATRO	7-deoxyloganetic acid glucosyltransferase OS=Catharanthus roseus GN=UGT709C2 PE=1 SV=1	At1g22360	KOG1192	UDP-glucuronosyl and UDP-glucosyl transferase	--	--	-	-	-
Unigene024906	1691	FGT-like16	3.58539	4.88992	5.50844	AT2G15490.1	UDP-glycosyltransferase 73B4|Chr2:6761750-6763398 FORWARD LENGTH=484	KVH94932.1	UDP-glucuronosyl/UDP-glucosyltransferase [Cynara cardunculus var. scolymus]	sp|Q9ZSK5|ZOG_PHALU	Zeatin O-glucosyltransferase OS=Phaseolus lunatus GN=ZOG1 PE=2 SV=1	At2g15480	KOG1192	UDP-glucuronosyl and UDP-glucosyl transferase	K13495//cis-zeatin O-glucosyltransferase [EC:2.4.1.215]	sot:102581540	-	-	-
Unigene026141	1521	FGT-like17	50.8819	25.5183	58.4171	AT2G23250.1	UDP-glucosyl transferase 84B2|Chr2:9897809-9899125 REVERSE LENGTH=438	KVH93314.1	UDP-glucuronosyl/UDP-glucosyltransferase [Cynara cardunculus var. scolymus]	sp|O22183|U84B2_ARATH	UDP-glycosyltransferase 84B2 OS=Arabidopsis thaliana GN=UGT84B2 PE=3 SV=1	At2g23250	KOG1192	UDP-glucuronosyl and UDP-glucosyl transferase	K13692//UDP-glucose:(indol-3-yl)acetate beta-D-glucosyltransferase [EC:2.4.1.121]	vvi:100252177	-	GO:0016740//transferase activity;GO:0003824//catalytic activity	-
Unigene026252	1365	FGT-like18	1.43841	2.84989	1.33296	AT3G46670.1	UDP-glucosyl transferase 76E11|Chr3:17192795-17194227 REVERSE LENGTH=451	KVH94641.1	UDP-glucuronosyl/UDP-glucosyltransferase [Cynara cardunculus var. scolymus]	sp|U3UA11|UGT7_CATRO	UDP-glucose iridoid glucosyltransferase OS=Catharanthus roseus GN=UGT76A2 PE=1 SV=1	At3g46670	KOG1192	UDP-glucuronosyl and UDP-glucosyl transferase	--	--	-	-	-
Unigene026419	1782	FGT-like19	34.8241	10.4757	20.6642	AT3G16520.3	UDP-glucosyl transferase 88A1|Chr3:5619355-5620833 REVERSE LENGTH=462	Q6VAA7.1	RecName: Full=UDP-glycosyltransferase 88B1// AAR06919.1 UDP-glycosyltransferase 88B1 [Stevia rebaudiana]	sp|Q6VAA7|U88B1_STERE	UDP-glycosyltransferase 88B1 OS=Stevia rebaudiana GN=UGT88B1 PE=2 SV=1	At3g16520	KOG1192	UDP-glucuronosyl and UDP-glucosyl transferase	--	--	-	-	-
Unigene026791	1734	FGT-like20	75.2082	79.5887	57.5649	AT3G16520.3	UDP-glucosyl transferase 88A1|Chr3:5619355-5620833 REVERSE LENGTH=462	ACB56924.1	glycosyltransferase UGT88A8 [Pilosella officinarum]	sp|Q6VAA7|U88B1_STERE	UDP-glycosyltransferase 88B1 OS=Stevia rebaudiana GN=UGT88B1 PE=2 SV=1	At3g16520	KOG1192	UDP-glucuronosyl and UDP-glucosyl transferase	--	--	-	GO:0016757//transferase activity, transferring glycosyl groups;GO:0003824//catalytic activity;GO:0016740//transferase activity	-
Unigene027820	1573	FGT-like21	13.4758	4.1627	6.19673	AT5G03490.1	UDP-Glycosyltransferase superfamily protein|Chr5:871550-872947 FORWARD LENGTH=465	AIL51398.1	glycosyltransferase [Actinidia deliciosa]	sp|Q9LZD8|U89A2_ARATH	UDP-glycosyltransferase 89A2 OS=Arabidopsis thaliana GN=UGT89A2 PE=2 SV=1	At5g03490	KOG1192	UDP-glucuronosyl and UDP-glucosyl transferase	--	--	-	GO:0003824//catalytic activity;GO:0016740//transferase activity	-
Unigene028391	1435	FGT-like22	15.497	7.59631	30.0088	AT1G22360.1	UDP-glucosyl transferase 85A2|Chr1:7895068-7897527 REVERSE LENGTH=481	Q6VAB3.1	RecName: Full=UDP-glycosyltransferase 85A8// AAR06913.1 UDP-glycosyltransferase 85A8 [Stevia rebaudiana]	sp|Q6VAB3|U85A8_STERE	UDP-glycosyltransferase 85A8 OS=Stevia rebaudiana GN=UGT85A8 PE=2 SV=1	At1g22360	KOG1192	UDP-glucuronosyl and UDP-glucosyl transferase	--	--	-	GO:0016757//transferase activity, transferring glycosyl groups;GO:0003824//catalytic activity;GO:0016740//transferase activity	-
Unigene028693	1591	FGT-like23	20.6214	24.3594	46.1285	AT4G01070.1	UDP-Glycosyltransferase superfamily protein|Chr4:461858-463300 REVERSE LENGTH=480	KVH97274.1	UDP-glucuronosyl/UDP-glucosyltransferase [Cynara cardunculus var. scolymus]	sp|Q9AR73|HQGT_RAUSE	Hydroquinone glucosyltransferase OS=Rauvolfia serpentina GN=AS PE=1 SV=1	At4g01070	KOG1192	UDP-glucuronosyl and UDP-glucosyl transferase	K08237//hydroquinone glucosyltransferase [EC:2.4.1.218]	sly:101244237	-	GO:0016740//transferase activity;GO:0016757//transferase activity, transferring glycosyl groups;GO:0003824//catalytic activity	-
Unigene031238	1541	FGT-like24	1.26475	2.26369	2.86755	AT1G22340.1	UDP-glucosyl transferase 85A7|Chr1:7890464-7892090 REVERSE LENGTH=487	Q6VAA4.1	RecName: Full=UDP-glycosyltransferase 85C1// AAR06922.1 UDP-glycosyltransferase 85C1 [Stevia rebaudiana]	sp|Q6VAA4|U85C1_STERE	UDP-glycosyltransferase 85C1 OS=Stevia rebaudiana GN=UGT85C1 PE=2 SV=1	At1g22340	KOG1192	UDP-glucuronosyl and UDP-glucosyl transferase	--	--	-	-	-
Unigene031849	1674	FGT-like25	15.0469	30.3859	27.0182	AT5G12890.1	UDP-Glycosyltransferase superfamily protein|Chr5:4069658-4071124 REVERSE LENGTH=488	KVI09446.1	UDP-glucuronosyl/UDP-glucosyltransferase [Cynara cardunculus var. scolymus]	sp|Q9LXV0|U92A1_ARATH	UDP-glycosyltransferase 92A1 OS=Arabidopsis thaliana GN=UGT92A1 PE=2 SV=1	At5g12890	KOG1192	UDP-glucuronosyl and UDP-glucosyl transferase	--	--	-	-	-
Unigene033204	2267	FGT-like26	46.1133	45.6251	14.963	AT2G36780.1	UDP-Glycosyltransferase superfamily protein|Chr2:15417618-15419108 REVERSE LENGTH=496	KVH90492.1	UDP-glucuronosyl/UDP-glucosyltransferase [Cynara cardunculus var. scolymus]	sp|Q9ZQ96|U73C3_ARATH	UDP-glycosyltransferase 73C3 OS=Arabidopsis thaliana GN=UGT73C3 PE=2 SV=1	At2g36780	KOG1192	UDP-glucuronosyl and UDP-glucosyl transferase	K13496//UDP-glucosyl transferase 73C [EC:2.4.1.-]	sot:102581302	-	GO:0016757//transferase activity, transferring glycosyl groups;GO:0003824//catalytic activity;GO:0016740//transferase activity	-
Unigene034194	1805	FGT-like27	11.4613	4.00196	17.3771	AT2G36800.1	don-glucosyltransferase 1|Chr2:15423493-15424980 REVERSE LENGTH=495	KVH99932.1	UDP-glucuronosyl/UDP-glucosyltransferase [Cynara cardunculus var. scolymus]	sp|Q6VAA9|U73E1_STERE	UDP-glycosyltransferase 73E1 OS=Stevia rebaudiana GN=UGT73E1 PE=2 SV=1	At2g36800	KOG1192	UDP-glucuronosyl and UDP-glucosyl transferase	K13496//UDP-glucosyl transferase 73C [EC:2.4.1.-]	sly:101261181	-	-	-
Unigene034195	1744	FGT-like28	7.40849	13.1655	20.6682	AT2G36770.1	UDP-Glycosyltransferase superfamily protein|Chr2:15415227-15416717 REVERSE LENGTH=496	KVH99932.1	UDP-glucuronosyl/UDP-glucosyltransferase [Cynara cardunculus var. scolymus]	sp|Q6VAA9|U73E1_STERE	UDP-glycosyltransferase 73E1 OS=Stevia rebaudiana GN=UGT73E1 PE=2 SV=1	At2g36770	KOG1192	UDP-glucuronosyl and UDP-glucosyl transferase	K13496//UDP-glucosyl transferase 73C [EC:2.4.1.-]	sot:102603165	-	-	-
Unigene034198	1681	FGT-like29	55.7776	39.8603	136.414	AT2G36780.1	UDP-Glycosyltransferase superfamily protein|Chr2:15417618-15419108 REVERSE LENGTH=496	Q6VAA9.1	RecName: Full=UDP-glycosyltransferase 73E1// AAR06917.1 UDP-glycosyltransferase 73E1 [Stevia rebaudiana]	sp|Q6VAA9|U73E1_STERE	UDP-glycosyltransferase 73E1 OS=Stevia rebaudiana GN=UGT73E1 PE=2 SV=1	At2g36780	KOG1192	UDP-glucuronosyl and UDP-glucosyl transferase	K13496//UDP-glucosyl transferase 73C [EC:2.4.1.-]	sot:102603165	-	GO:0016740//transferase activity;GO:0003824//catalytic activity;GO:0016757//transferase activity, transferring glycosyl groups	-
Unigene034448	1683	FGT-like30	16.0356	9.96718	23.6822	AT5G12890.1	UDP-Glycosyltransferase superfamily protein|Chr5:4069658-4071124 REVERSE LENGTH=488	KVH94710.1	UDP-glucuronosyl/UDP-glucosyltransferase [Cynara cardunculus var. scolymus]	sp|Q9LXV0|U92A1_ARATH	UDP-glycosyltransferase 92A1 OS=Arabidopsis thaliana GN=UGT92A1 PE=2 SV=1	At5g12890	KOG1192	UDP-glucuronosyl and UDP-glucosyl transferase	--	--	-	-	-
Unigene034659	1582	FGT-like31	33.2406	7.31935	18.6766	AT1G22400.1	UDP-Glycosyltransferase superfamily protein|Chr1:7903851-7906607 REVERSE LENGTH=489	KVE39115.1	UDP-glucuronosyl/UDP-glucosyltransferase [Cynara cardunculus var. scolymus]	sp|Q6VAB0|U85C2_STERE	UDP-glycosyltransferase 85C2 OS=Stevia rebaudiana GN=UGT85C2 PE=1 SV=1	At1g22400	KOG1192	UDP-glucuronosyl and UDP-glucosyl transferase	--	--	-	-	-
Unigene036593	1714	FGT-like32	187.742	217.117	136.594	AT4G15550.1	indole-3-acetate beta-D-glucosyltransferase|Chr4:8877877-8879301 REVERSE LENGTH=474	KVI08356.1	UDP-glucuronosyl/UDP-glucosyltransferase [Cynara cardunculus var. scolymus]	sp|F8WKW0|UGT1_GARJA	Crocetin glucosyltransferase, chloroplastic OS=Gardenia jasminoides GN=UGT75L6 PE=1 SV=1	At1g05560	KOG1192	UDP-glucuronosyl and UDP-glucosyl transferase	K12338//anthocyanidin 3-O-glucoside 5-O-glucosyltransferase [EC:2.4.1.298]	vvi:100260080	-	-	-
Unigene037034	1671	FGT-like33	74.9921	173.627	32.3825	AT1G73880.1	UDP-glucosyl transferase 89B1|Chr1:27785143-27786564 FORWARD LENGTH=473	KVH99304.1	UDP-glucuronosyl/UDP-glucosyltransferase [Cynara cardunculus var. scolymus]	sp|Q9C9B0|U89B1_ARATH	UDP-glycosyltransferase 89B1 OS=Arabidopsis thaliana GN=UGT89B1 PE=2 SV=2	At1g73880	KOG1192	UDP-glucuronosyl and UDP-glucosyl transferase	--	--	-	-	-
Unigene037372	2926	FGT-like34	38.3135	148.168	93.8106	AT2G36780.1	UDP-Glycosyltransferase superfamily protein|Chr2:15417618-15419108 REVERSE LENGTH=496	KVH90497.1	UDP-glucuronosyl/UDP-glucosyltransferase [Cynara cardunculus var. scolymus]	sp|Q9ZQ96|U73C3_ARATH	UDP-glycosyltransferase 73C3 OS=Arabidopsis thaliana GN=UGT73C3 PE=2 SV=1	At2g36780	KOG1192	UDP-glucuronosyl and UDP-glucosyl transferase	K13496//UDP-glucosyl transferase 73C [EC:2.4.1.-]	sot:102581302	-	GO:0016740//transferase activity;GO:0016757//transferase activity, transferring glycosyl groups;GO:0003824//catalytic activity	-
Unigene037820	1789	FGT-like35	330.235	143.404	240.273	AT1G22360.1	UDP-glucosyl transferase 85A2|Chr1:7895068-7897527 REVERSE LENGTH=481	KVI07929.1	UDP-glucuronosyl/UDP-glucosyltransferase [Cynara cardunculus var. scolymus]	sp|F8WKW1|UGT2_GARJA	7-deoxyloganetin glucosyltransferase OS=Gardenia jasminoides GN=UGT85A24 PE=1 SV=1	At1g22360	KOG1192	UDP-glucuronosyl and UDP-glucosyl transferase	--	--	-	GO:0003824//catalytic activity;GO:0016740//transferase activity;GO:0016757//transferase activity, transferring glycosyl groups	-
Unigene038536	2521	FGT-like36	5.0124	7.25276	9.64095	AT1G22380.1	UDP-glucosyl transferase 85A3|Chr1:7900522-7902332 REVERSE LENGTH=488	AIE12477.1	UGT4 [Panax ginseng]	sp|U3U992|UGT8_CATRO	7-deoxyloganetic acid glucosyltransferase OS=Catharanthus roseus GN=UGT709C2 PE=1 SV=1	At1g22360	KOG1192	UDP-glucuronosyl and UDP-glucosyl transferase	--	--	-	-	-
Unigene041227	1728	FGT-like37	25.3137	26.7234	51.5454	AT1G22400.1	UDP-Glycosyltransferase superfamily protein|Chr1:7903851-7906607 REVERSE LENGTH=489	KVH40371.1	UDP-glucuronosyl/UDP-glucosyltransferase [Cynara cardunculus var. scolymus]	sp|F8WKW1|UGT2_GARJA	7-deoxyloganetin glucosyltransferase OS=Gardenia jasminoides GN=UGT85A24 PE=1 SV=1	At1g22400	KOG1192	UDP-glucuronosyl and UDP-glucosyl transferase	--	--	-	-	-
Unigene041419	1664	FGT-like38	12.542	3.62603	3.22845	AT5G17050.1	UDP-glucosyl transferase 78D2|Chr5:5607828-5609392 REVERSE LENGTH=460	BAP47702.1	UDP-glucose:flavonoid 3-O-glucosyltransferase [Gynura bicolor]	sp|Q9SBQ8|KGLT_PETHY	Kaempferol 3-O-beta-D-galactosyltransferase OS=Petunia hybrida PE=1 SV=1	At5g17050	KOG1192	UDP-glucuronosyl and UDP-glucosyl transferase	K12930//anthocyanidin 3-O-glucosyltransferase [EC:2.4.1.115]	pop:POPTR_0013s12310g	-	-	-
Unigene041765	1572	FGT-like39	60.846	46.3231	29.6815	AT2G43840.2	UDP-glycosyltransferase 74 F1|Chr2:18157681-18159166 FORWARD LENGTH=449	KVI01672.1	UDP-glucuronosyl/UDP-glucosyltransferase [Cynara cardunculus var. scolymus]	sp|Q6VAA6|U74G1_STERE	UDP-glycosyltransferase 74G1 OS=Stevia rebaudiana GN=UGT74G1 PE=1 SV=1	At2g43820	KOG1192	UDP-glucuronosyl and UDP-glucosyl transferase	K13691//pathogen-inducible salicylic acid glucosyltransferase [EC:2.4.1.-]	bvg:104894469	-	GO:0003824//catalytic activity;GO:0016740//transferase activity;GO:0016757//transferase activity, transferring glycosyl groups	-
Unigene041879	1998	FGT-like40	30.8452	91.3	65.1141	AT2G36800.1	don-glucosyltransferase 1|Chr2:15423493-15424980 REVERSE LENGTH=495	KVH90497.1	UDP-glucuronosyl/UDP-glucosyltransferase [Cynara cardunculus var. scolymus]	sp|Q9ZQ97|U73C4_ARATH	UDP-glycosyltransferase 73C4 OS=Arabidopsis thaliana GN=UGT73C4 PE=2 SV=1	At2g36770	KOG1192	UDP-glucuronosyl and UDP-glucosyl transferase	K13496//UDP-glucosyl transferase 73C [EC:2.4.1.-]	vvi:100248767	-	GO:0003824//catalytic activity;GO:0016757//transferase activity, transferring glycosyl groups;GO:0016740//transferase activity	-
Unigene042167	2874	FGT-like41	23.1951	20.94	26.2471	AT1G22380.1	UDP-glucosyl transferase 85A3|Chr1:7900522-7902332 REVERSE LENGTH=488	Q6VAA4.1	RecName: Full=UDP-glycosyltransferase 85C1// AAR06922.1 UDP-glycosyltransferase 85C1 [Stevia rebaudiana]	sp|Q6VAA4|U85C1_STERE	UDP-glycosyltransferase 85C1 OS=Stevia rebaudiana GN=UGT85C1 PE=2 SV=1	At1g22400	KOG1192	UDP-glucuronosyl and UDP-glucosyl transferase	--	--	-	GO:0003824//catalytic activity;GO:0016740//transferase activity	-
Unigene042168	1494	FGT-like42	10.4763	14.9457	25.3149	AT1G22380.1	UDP-glucosyl transferase 85A3|Chr1:7900522-7902332 REVERSE LENGTH=488	ABB88577.1	UDP-glucosyltransferase [Ixeris dentata var. albiflora]	sp|Q6VAB0|U85C2_STERE	UDP-glycosyltransferase 85C2 OS=Stevia rebaudiana GN=UGT85C2 PE=1 SV=1	At1g22340	KOG1192	UDP-glucuronosyl and UDP-glucosyl transferase	--	--	-	GO:0003824//catalytic activity;GO:0016740//transferase activity	-
Unigene046010	2197	FGT-like43	80.5675	127.866	83.9242	AT4G15480.1	UDP-Glycosyltransferase superfamily protein|Chr4:8849000-8850472 REVERSE LENGTH=490	KVH97118.1	UDP-glucuronosyl/UDP-glucosyltransferase [Cynara cardunculus var. scolymus]	sp|Q9MB73|LGT_CITUN	Limonoid UDP-glucosyltransferase OS=Citrus unshiu PE=2 SV=1	At4g15480	KOG1192	UDP-glucuronosyl and UDP-glucosyl transferase	--	--	-	GO:0016757//transferase activity, transferring glycosyl groups;GO:0016740//transferase activity;GO:0003824//catalytic activity	-
Unigene048139	4127	FGT-like44	3.90476	4.88939	1.41707	AT5G49690.1	UDP-Glycosyltransferase superfamily protein|Chr5:20189968-20191350 REVERSE LENGTH=460	KVI06805.1	UDP-glucuronosyl/UDP-glucosyltransferase [Cynara cardunculus var. scolymus]	sp|Q9LTA3|U91C1_ARATH	UDP-glycosyltransferase 91C1 OS=Arabidopsis thaliana GN=UGT91C1 PE=2 SV=1	At5g49690	KOG1192	UDP-glucuronosyl and UDP-glucosyl transferase	--	--	-	GO:0003824//catalytic activity;GO:0016740//transferase activity	GO:0016020//membrane
Unigene049282	1346	FGT-like45	1.36852	2.04873	0.0321913	AT2G15490.3	UDP-glycosyltransferase 73B4|Chr2:6761750-6763398 FORWARD LENGTH=481	KVH87544.1	UDP-glucuronosyl/UDP-glucosyltransferase [Cynara cardunculus var. scolymus]	sp|Q9ZSK5|ZOG_PHALU	Zeatin O-glucosyltransferase OS=Phaseolus lunatus GN=ZOG1 PE=2 SV=1	At2g36770	KOG1192	UDP-glucuronosyl and UDP-glucosyl transferase	K13495//cis-zeatin O-glucosyltransferase [EC:2.4.1.215]	vvi:100262460	-	-	-
Unigene054070	1668	FGT-like46	56.8584	31.6053	18.7522	AT2G22590.1	UDP-Glycosyltransferase superfamily protein|Chr2:9593012-9594424 FORWARD LENGTH=470	KVI04038.1	UDP-glucuronosyl/UDP-glucosyltransferase [Cynara cardunculus var. scolymus]	sp|Q940V3|U91A1_ARATH	UDP-glycosyltransferase 91A1 OS=Arabidopsis thaliana GN=UGT91A1 PE=2 SV=1	At2g22590	KOG1192	UDP-glucuronosyl and UDP-glucosyl transferase	--	--	-	-	-
Unigene009737	1242	FMT-like1	10.9482	18.3608	33.6603	AT5G54160.1	O-methyltransferase 1|Chr5:21982075-21984167 FORWARD LENGTH=363	BAQ21905.1	O-methyltransferase [Carthamus tinctorius]	sp|Q8W013|COMT1_CATRO	Caffeic acid 3-O-methyltransferase OS=Catharanthus roseus GN=COMT1 PE=2 SV=1	At5g54160	KOG3178	Hydroxyindole-O-methyltransferase and related SAM-dependent methyltransferases	K13066//caffeic acid 3-O-methyltransferase [EC:2.1.1.68]	tcc:TCM_040757	-	-	-
Unigene016334	1212	FMT-like2	31.561	3.29448	0.178752	AT5G54160.1	O-methyltransferase 1|Chr5:21982075-21984167 FORWARD LENGTH=363	XP_011468886.1	PREDICTED: LOW QUALITY PROTEIN: caffeic acid 3-O-methyltransferase-like [Fragaria vesca subsp. vesca]	sp|P28002|COMT1_MEDSA	Caffeic acid 3-O-methyltransferase OS=Medicago sativa PE=1 SV=1	At5g54160	KOG3178	Hydroxyindole-O-methyltransferase and related SAM-dependent methyltransferases	K13066//caffeic acid 3-O-methyltransferase [EC:2.1.1.68]	fve:101294295	GO:0008152//metabolic process	GO:0016741//transferase activity, transferring one-carbon groups;GO:0005515//protein binding;GO:0003824//catalytic activity;GO:0016740//transferase activity;GO:0005488//binding;GO:0008168//methyltransferase activity	-
Unigene026068	1309	FMT-like3	76.1277	70.4558	73.8369	AT5G54160.1	O-methyltransferase 1|Chr5:21982075-21984167 FORWARD LENGTH=363	KVH88410.1	Caffeate O-methyltransferase (COMT) family [Cynara cardunculus var. scolymus]	sp|Q43239|COMT1_ZINVI	Caffeic acid 3-O-methyltransferase OS=Zinnia violacea PE=2 SV=1	At5g54160	KOG3178	Hydroxyindole-O-methyltransferase and related SAM-dependent methyltransferases	K13066//caffeic acid 3-O-methyltransferase [EC:2.1.1.68]	sly:101251452	-	-	-
Unigene026069	1524	FMT-like4	108.982	289.152	170.302	AT5G54160.1	O-methyltransferase 1|Chr5:21982075-21984167 FORWARD LENGTH=363	Q43239.1	RecName: Full=Caffeic acid 3-O-methyltransferase; Short=CAOMT; Short=COMT; AltName: Full=S-adenosysl-L-methionine:caffeic acid 3-O-methyltransferase// AAA86718.1 S-adenosyl-L-methionine:caffeic acid 3-O-methyltransferase [Zinnia violacea]	sp|Q43239|COMT1_ZINVI	Caffeic acid 3-O-methyltransferase OS=Zinnia violacea PE=2 SV=1	At5g54160	KOG3178	Hydroxyindole-O-methyltransferase and related SAM-dependent methyltransferases	K13066//caffeic acid 3-O-methyltransferase [EC:2.1.1.68]	vvi:100854172	-	-	-
Unigene031444	1238	FMT-like5	73.1283	49.2683	50.216	AT3G53140.1	O-methyltransferase family protein|Chr3:19695692-19697355 FORWARD LENGTH=359	KVI08129.1	Caffeate O-methyltransferase (COMT) family [Cynara cardunculus var. scolymus]	sp|Q6T1F5|COMT1_AMMMJ	Caffeic acid 3-O-methyltransferase OS=Ammi majus GN=COMT PE=1 SV=1	At3g53140	KOG3178	Hydroxyindole-O-methyltransferase and related SAM-dependent methyltransferases	--	--	-	-	-
Unigene039650	1241	FMT-like6	80.9412	20.1741	29.3932	AT5G54160.1	O-methyltransferase 1|Chr5:21982075-21984167 FORWARD LENGTH=363	EOY32732.1	Caffeic acid 3-O-methyltransferase 1 isoform 1 [Theobroma cacao]	sp|Q8W013|COMT1_CATRO	Caffeic acid 3-O-methyltransferase OS=Catharanthus roseus GN=COMT1 PE=2 SV=1	At5g54160	KOG3178	Hydroxyindole-O-methyltransferase and related SAM-dependent methyltransferases	K13066//caffeic acid 3-O-methyltransferase [EC:2.1.1.68]	tcc:TCM_040757	-	GO:0016740//transferase activity;GO:0003824//catalytic activity	-
Unigene039651	3931	FMT-like7	12.0499	8.314	14.7125	AT5G54160.1	O-methyltransferase 1|Chr5:21982075-21984167 FORWARD LENGTH=363	XP_018857512.1	PREDICTED: caffeic acid 3-O-methyltransferase-like [Juglans regia]	sp|Q8LL87|COMT1_COFCA	Caffeic acid 3-O-methyltransferase OS=Coffea canephora PE=2 SV=1	At5g54160	KOG3178	Hydroxyindole-O-methyltransferase and related SAM-dependent methyltransferases	K13066//caffeic acid 3-O-methyltransferase [EC:2.1.1.68]	fve:101294295	GO:0008152//metabolic process	GO:0016741//transferase activity, transferring one-carbon groups;GO:0016740//transferase activity;GO:0005515//protein binding;GO:0003824//catalytic activity;GO:0008168//methyltransferase activity;GO:0005488//binding	-
Unigene039652	1196	FMT-like8	4.97548	1.12978	0	AT5G54160.1	O-methyltransferase 1|Chr5:21982075-21984167 FORWARD LENGTH=363	XP_017982534.1	PREDICTED: caffeic acid 3-O-methyltransferase isoform X2 [Theobroma cacao]	sp|Q8W013|COMT1_CATRO	Caffeic acid 3-O-methyltransferase OS=Catharanthus roseus GN=COMT1 PE=2 SV=1	At5g54160	KOG3178	Hydroxyindole-O-methyltransferase and related SAM-dependent methyltransferases	K13066//caffeic acid 3-O-methyltransferase [EC:2.1.1.68]	tcc:TCM_040757	-	GO:0016740//transferase activity;GO:0003824//catalytic activity	-
Unigene053882	1161	FMT-like9	10.3391	0.311601	0.671623	AT5G54160.1	O-methyltransferase 1|Chr5:21982075-21984167 FORWARD LENGTH=363	XP_006478222.1	PREDICTED: caffeic acid 3-O-methyltransferase-like [Citrus sinensis]	sp|P28002|COMT1_MEDSA	Caffeic acid 3-O-methyltransferase OS=Medicago sativa PE=1 SV=1	At5g54160	KOG3178	Hydroxyindole-O-methyltransferase and related SAM-dependent methyltransferases	K13066//caffeic acid 3-O-methyltransferase [EC:2.1.1.68]	cit:102626016	-	GO:0016740//transferase activity;GO:0003824//catalytic activity	-
Unigene011671	1551	FAT-like1	33.9663	56.1353	175.47	AT1G33540.1	serine carboxypeptidase-like 18|Chr1:12162349-12164700 REVERSE LENGTH=464	KVH97339.1	Peptidase S10, serine carboxypeptidase [Cynara cardunculus var. scolymus]	sp|Q9C7Z9|SCP18_ARATH	Serine carboxypeptidase-like 18 OS=Arabidopsis thaliana GN=SCPL18 PE=2 SV=2	At1g73280	KOG1282	Serine carboxypeptidases (lysosomal cathepsin A)	K16296//serine carboxypeptidase-like clade I [EC:3.4.16.-]	sot:102604189	-	-	-
Unigene014118	1797	FAT-like2	3.36766	0.757956	1.61531	AT3G12203.1	serine carboxypeptidase-like 17|Chr3:3891357-3893956 REVERSE LENGTH=437	KVH00728.1	Peptidase S10, serine carboxypeptidase [Cynara cardunculus var. scolymus]	sp|Q9C7D6|SCP17_ARATH	Serine carboxypeptidase-like 17 OS=Arabidopsis thaliana GN=SCPL17 PE=2 SV=1	At3g12203	KOG1282	Serine carboxypeptidases (lysosomal cathepsin A)	K16296//serine carboxypeptidase-like clade I [EC:3.4.16.-]	sot:102586969	-	-	-
Unigene016121	1494	FAT-like3	0.858275	17.181	58.1109	AT3G29670.1	HXXXD-type acyl-transferase family protein|Chr3:11527952-11529307 FORWARD LENGTH=451	KVI04210.1	Chloramphenicol acetyltransferase-like domain-containing protein [Cynara cardunculus var. scolymus]	sp|Q8GSN8|3MAT_DAHPI	Malonyl-coenzyme A:anthocyanin 3-O-glucoside-6''-O-malonyltransferase OS=Dahlia pinnata GN=3MAT PE=1 SV=1	--	--	--	--	--	-	-	-
Unigene022998	1639	FAT-like4	3.95696	20.1767	21.9393	AT1G03940.1	HXXXD-type acyl-transferase family protein|Chr1:1009542-1010951 REVERSE LENGTH=469	KVI04210.1	Chloramphenicol acetyltransferase-like domain-containing protein [Cynara cardunculus var. scolymus]	sp|Q8GSN8|3MAT_DAHPI	Malonyl-coenzyme A:anthocyanin 3-O-glucoside-6''-O-malonyltransferase OS=Dahlia pinnata GN=3MAT PE=1 SV=1	--	--	--	--	--	-	-	-
Unigene025804	1611	FAT-like5	16.6431	0.702092	0.779874	AT1G28110.2	serine carboxypeptidase-like 45|Chr1:9804153-9806832 REVERSE LENGTH=461	XP_010249188.1	PREDICTED: serine carboxypeptidase-like 45 [Nelumbo nucifera]	sp|Q93Y09|SCP45_ARATH	Serine carboxypeptidase-like 45 OS=Arabidopsis thaliana GN=SCPL45 PE=2 SV=1	At1g28110	KOG1282	Serine carboxypeptidases (lysosomal cathepsin A)	K16297//serine carboxypeptidase-like clade II [EC:3.4.16.-]	vvi:100255776	GO:0044238//primary metabolic process;GO:0043170//macromolecule metabolic process;GO:0071704//organic substance metabolic process;GO:0019538//protein metabolic process;GO:0008152//metabolic process	GO:0003824//catalytic activity;GO:0004180//carboxypeptidase activity;GO:0008238//exopeptidase activity;GO:0016787//hydrolase activity;GO:0008233//peptidase activity;GO:0070011//peptidase activity, acting on L-amino acid peptides	-
Unigene026654	1851	FAT-like6	284.979	143.215	114.544	AT4G30810.1	serine carboxypeptidase-like 29|Chr4:15003474-15006017 FORWARD LENGTH=479	KVI11734.1	Peptidase S10, serine carboxypeptidase [Cynara cardunculus var. scolymus]	sp|P55748|CBP22_HORVU	Serine carboxypeptidase II-2 (Fragment) OS=Hordeum vulgare GN=CXP;2-2 PE=1 SV=1	At4g30810	KOG1282	Serine carboxypeptidases (lysosomal cathepsin A)	K16297//serine carboxypeptidase-like clade II [EC:3.4.16.-]	vvi:100241649	-	-	-
Unigene027060	1495	FAT-like7	14.7311	6.55535	5.9693	AT5G23210.1	serine carboxypeptidase-like 34|Chr5:7810892-7814837 FORWARD LENGTH=499	XP_017220342.1	PREDICTED: serine carboxypeptidase-like 34 [Daucus carota subsp. sativus]	sp|Q0WPR4|SCP34_ARATH	Serine carboxypeptidase-like 34 OS=Arabidopsis thaliana GN=SCPL34 PE=2 SV=2	At5g23210	KOG1282	Serine carboxypeptidases (lysosomal cathepsin A)	K16297//serine carboxypeptidase-like clade II [EC:3.4.16.-]	csv:101211962	-	-	-
Unigene032701	1766	FAT-like8	8.53315	1.08099	0.662355	AT4G30610.1	alpha/beta-Hydrolases superfamily protein|Chr4:14944219-14948391 FORWARD LENGTH=465	XP_019170644.1	PREDICTED: serine carboxypeptidase 24-like [Ipomoea nil]	sp|Q9M099|SCP24_ARATH	Serine carboxypeptidase 24 OS=Arabidopsis thaliana GN=SCPL24 PE=1 SV=1	At4g30610	KOG1282	Serine carboxypeptidases (lysosomal cathepsin A)	K16297//serine carboxypeptidase-like clade II [EC:3.4.16.-]	tcc:TCM_037034	-	-	-
Unigene034450	1557	FAT-like9	8.01421	17.7913	39.4273	AT2G22970.1	serine carboxypeptidase-like 11|Chr2:9774875-9778224 FORWARD LENGTH=433	XP_016557336.1	PREDICTED: serine carboxypeptidase-like 17 isoform X1 [Capsicum annuum]	sp|Q2V465|SCP11_ARATH	Serine carboxypeptidase-like 11 OS=Arabidopsis thaliana GN=SCPL11 PE=2 SV=2	At2g22970	KOG1282	Serine carboxypeptidases (lysosomal cathepsin A)	K16296//serine carboxypeptidase-like clade I [EC:3.4.16.-]	jcu:105630826	-	-	-
Unigene034966	2277	FAT-like10	66.7003	29.9451	37.9762	AT3G07990.1	serine carboxypeptidase-like 27|Chr3:2552544-2554644 FORWARD LENGTH=459	KVI09745.1	Peptidase S10, serine carboxypeptidase [Cynara cardunculus var. scolymus]	sp|Q9SFB5|SCP27_ARATH	Serine carboxypeptidase-like 27 OS=Arabidopsis thaliana GN=SCPL27 PE=2 SV=1	At3g07990	KOG1282	Serine carboxypeptidases (lysosomal cathepsin A)	K16297//serine carboxypeptidase-like clade II [EC:3.4.16.-]	sot:102588799	-	-	-
Unigene039413	1859	FAT-like11	27.7937	59.0378	106.011	AT3G12220.1	serine carboxypeptidase-like 16|Chr3:3896531-3898915 REVERSE LENGTH=435	KVH97339.1	Peptidase S10, serine carboxypeptidase [Cynara cardunculus var. scolymus]	sp|Q9C7D4|SCP16_ARATH	Serine carboxypeptidase-like 16 OS=Arabidopsis thaliana GN=SCPL16 PE=2 SV=1	At3g12220	KOG1282	Serine carboxypeptidases (lysosomal cathepsin A)	K16296//serine carboxypeptidase-like clade I [EC:3.4.16.-]	pmum:103335121	-	-	-
Unigene039783	2581	FAT-like12	82.0941	78.6817	104.368	AT3G12220.2	serine carboxypeptidase-like 16|Chr3:3896531-3898752 REVERSE LENGTH=405	KVE54081.1	Peptidase S10, serine carboxypeptidase [Cynara cardunculus var. scolymus]	sp|Q9C7D4|SCP16_ARATH	Serine carboxypeptidase-like 16 OS=Arabidopsis thaliana GN=SCPL16 PE=2 SV=1	At3g12220	KOG1282	Serine carboxypeptidases (lysosomal cathepsin A)	K16296//serine carboxypeptidase-like clade I [EC:3.4.16.-]	sot:102586969	-	-	-
Unigene040284	1876	FAT-like13	45.0245	21.9811	20.5298	AT4G12910.2	serine carboxypeptidase-like 20|Chr4:7550872-7553051 REVERSE LENGTH=455	XP_002321240.1	serine carboxypeptidase S10 family protein [Populus trichocarpa]// EEE99555.1 serine carboxypeptidase S10 family protein [Populus trichocarpa]	sp|P37890|CBP1_ORYSJ	Serine carboxypeptidase 1 OS=Oryza sativa subsp. japonica GN=CBP1 PE=2 SV=1	At3g25420	KOG1282	Serine carboxypeptidases (lysosomal cathepsin A)	K16296//serine carboxypeptidase-like clade I [EC:3.4.16.-]	pop:POPTR_0014s17580g	-	-	-
Unigene040285	1851	FAT-like14	42.5298	13.9022	8.28529	AT4G12910.1	serine carboxypeptidase-like 20|Chr4:7550576-7553051 REVERSE LENGTH=497	XP_011089617.1	PREDICTED: serine carboxypeptidase 1 [Sesamum indicum]	sp|P37890|CBP1_ORYSJ	Serine carboxypeptidase 1 OS=Oryza sativa subsp. japonica GN=CBP1 PE=2 SV=1	At3g25420	KOG1282	Serine carboxypeptidases (lysosomal cathepsin A)	K16296//serine carboxypeptidase-like clade I [EC:3.4.16.-]	pop:POPTR_0014s17580g	-	-	-
Unigene040413	2043	FAT-like15	90.9311	111.661	15.2893	AT1G33540.1	serine carboxypeptidase-like 18|Chr1:12162349-12164700 REVERSE LENGTH=464	KVH87783.1	Peptidase S10, serine carboxypeptidase, partial [Cynara cardunculus var. scolymus]	sp|O64811|SCP9_ARATH	Serine carboxypeptidase-like 9 OS=Arabidopsis thaliana GN=SCPL9 PE=2 SV=1	At2g23010	KOG1282	Serine carboxypeptidases (lysosomal cathepsin A)	K16296//serine carboxypeptidase-like clade I [EC:3.4.16.-]	pxb:103935152	-	-	-
Unigene040414	1898	FAT-like16	11.9462	29.5064	10.2256	AT1G33540.1	serine carboxypeptidase-like 18|Chr1:12162349-12164700 REVERSE LENGTH=464	KVH87783.1	Peptidase S10, serine carboxypeptidase, partial [Cynara cardunculus var. scolymus]	sp|Q9C7Z9|SCP18_ARATH	Serine carboxypeptidase-like 18 OS=Arabidopsis thaliana GN=SCPL18 PE=2 SV=2	At1g33540	KOG1282	Serine carboxypeptidases (lysosomal cathepsin A)	K16296//serine carboxypeptidase-like clade I [EC:3.4.16.-]	fve:101307753	-	-	-
Unigene041497	1805	FAT-like17	6.47683	15.4114	40.2512	AT3G29670.1	HXXXD-type acyl-transferase family protein|Chr3:11527952-11529307 FORWARD LENGTH=451	KVI04168.1	Chloramphenicol acetyltransferase-like domain-containing protein [Cynara cardunculus var. scolymus]	sp|Q8GSN8|3MAT_DAHPI	Malonyl-coenzyme A:anthocyanin 3-O-glucoside-6''-O-malonyltransferase OS=Dahlia pinnata GN=3MAT PE=1 SV=1	--	--	--	--	--	-	-	-
Unigene042708	1524	FAT-like18	151.202	133.292	228.868	AT3G29670.1	HXXXD-type acyl-transferase family protein|Chr3:11527952-11529307 FORWARD LENGTH=451	KVI04210.1	Chloramphenicol acetyltransferase-like domain-containing protein [Cynara cardunculus var. scolymus]	sp|Q8GSN8|3MAT_DAHPI	Malonyl-coenzyme A:anthocyanin 3-O-glucoside-6''-O-malonyltransferase OS=Dahlia pinnata GN=3MAT PE=1 SV=1	--	--	--	--	--	-	-	-
