# Supplementary material for: Integrated metabolome and transcriptome revealed the flavonoid biosynthetic pathway in developing Vernonia amygdalina leaves
Source: PeerJ. 2021 Apr 26;9:e11239. doi: 10.7717/peerj.11239 (PMC8083182; doi:10.7717/peerj.11239)
Supplement: Supplemental Information 11 [file peerj-09-11239-s011.xls]

## Sheet: Pearson
Table S8 The correlation analysis between the expressions of genes and the contents of flavonoids.
		Baicalin	Rhoifolin	Orientin	5-Hydroxy-2-(4-hydroxyphenyl)-4-oxo-4H-chromen-7-yl 6-O-acetyl-β-D-glucopyranoside	5-Hydroxy-2-(3-hydroxy-4-methoxyphenyl)-4-oxo-4H-chromen-7-yl β-D-glucopyranosiduronic acid	Apigetrin	3-(4-Methoxyphenyl)-4-oxo-4H-chromen-7-yl 4-O-(carboxyacetyl)-β-D-glucopyranoside	Ononin	Biochanin A-β-D-glucoside	Malonylgenistin	kaempferol 7-O-β-D-glucopyranoside	Tiliroside	Kaempferol-3-Glucuronide	5-[3-(α-L-glycero-Hexopyranosyloxy)-5,7-dihydroxy-4-oxo-4H-chromen-2-yl]-2,3-dihydroxyphenyl α-L-erythro-hexopyranoside	2-(3,4-Dihydroxyphenyl)-5,7-dihydroxy-4-oxo-4H-chromen-3-yl β-D-xylopyranosyl-(1->2)-β-D-glucopyranosyl-(1->3)-β-D-glucopyranoside	Mangiferin	Irisxanthone
Unigene000883	FGT-like1	0.981	0.808	-0.755	-0.755	-0.755	-0.755	-0.293	-0.755	-0.19	0.945	-0.755	-0.985	-0.755	-0.755	-0.755	-0.987	-0.958
Unigene002192	FGT-like2	-0.981	-0.972	0.948	0.948	0.948	0.948	-0.094	0.948	-0.199	-0.749	0.948	0.843	0.948	0.948	0.948	0.974	0.995
Unigene007839	FGT-like3	-0.017	0.406	-0.482	-0.482	-0.482	-0.482	0.996	-0.482	1.000*	-0.518	-0.482	0.378	-0.482	-0.482	-0.482	0.048	-0.081
Unigene010018	FGT-like4	-0.632	-0.9	0.933	0.933	0.933	0.933	-0.707	0.933	-0.778	-0.156	0.933	0.308	0.933	0.933	0.933	0.607	0.704
Unigene010019	FGT-like5	-0.912	-1.000**	0.995	0.995	0.995	0.995	-0.316	0.995	-0.415	-0.581	0.995	0.701	0.995	0.995	0.995	0.898	0.947
Unigene012465	FGT-like6	-0.803	-0.979	0.993	0.993	0.993	0.993	-0.511	0.993	-0.599	-0.394	0.993	0.532	0.993	0.993	0.993	0.784	0.857
Unigene013508	FGT-like7	-0.935	-0.997*	0.988	0.988	0.988	0.988	-0.258	0.988	-0.359	-0.629	0.988	0.742	0.988	0.988	0.988	0.923	0.965
Unigene014304	FGT-like8	-0.83	-0.988	0.997*	0.997*	0.997*	0.997*	-0.471	0.997*	-0.562	-0.436	0.997*	0.571	0.997*	0.997*	0.997*	0.812	0.88
Unigene019388	FGT-like9	0.541	0.845	-0.887	-0.887	-0.887	-0.887	0.782	-0.887	0.843	0.044	-0.887	-0.199	-0.887	-0.887	-0.887	-0.514	-0.62
Unigene020576	FGT-like10	0.931	0.998*	-0.989	-0.989	-0.989	-0.989	0.268	-0.989	0.369	0.62	-0.989	-0.735	-0.989	-0.989	-0.989	-0.919	-0.962
Unigene021344	FGT-like11	-0.529	-0.837	0.88	0.88	0.88	0.88	-0.79	0.88	-0.851	-0.03	0.88	0.185	0.88	0.88	0.88	0.502	0.609
Unigene021742	FGT-like12	-0.88	-0.998*	1.000*	1.000*	1.000*	1.000*	-0.383	1.000*	-0.479	-0.521	1.000*	0.648	1.000*	1.000*	1.000*	0.864	0.922
Unigene023459	FGT-like13	-0.853	-0.993	1.000*	1.000*	1.000*	1.000*	-0.433	1.000*	-0.526	-0.474	1.000*	0.606	1.000*	1.000*	1.000*	0.836	0.9
Unigene024075	FGT-like14	0.96	0.753	-0.694	-0.694	-0.694	-0.694	-0.376	-0.694	-0.276	0.97	-0.694	-0.996	-0.694	-0.694	-0.694	-0.968	-0.928
Unigene024486	FGT-like15	1.000*	0.918	-0.881	-0.881	-0.881	-0.881	-0.075	-0.881	0.032	0.85	-0.881	-0.922	-0.881	-0.881	-0.881	-0.998*	-0.998*
Unigene024906	FGT-like16	0.98	0.972	-0.949	-0.949	-0.949	-0.949	0.097	-0.949	0.202	0.747	-0.949	-0.842	-0.949	-0.949	-0.949	-0.974	-0.995
Unigene026141	FGT-like17	0.214	-0.217	0.299	0.299	0.299	0.299	-0.993	0.299	-0.976	0.677	0.299	-0.554	0.299	0.299	0.299	-0.245	-0.119
Unigene026252	FGT-like18	-0.058	0.368	-0.445	-0.445	-0.445	-0.445	0.999*	-0.445	0.998*	-0.553	-0.445	0.416	-0.445	-0.445	-0.445	0.089	-0.039
Unigene026419	FGT-like19	-0.582	-0.871	0.909	0.909	0.909	0.909	-0.749	0.909	-0.815	-0.094	0.909	0.248	0.909	0.909	0.909	0.557	0.659
Unigene026791	FGT-like20	-0.754	-0.407	0.328	0.328	0.328	0.328	0.73	0.328	0.654	-0.982	0.328	0.941	0.328	0.328	0.328	0.774	0.687
Unigene027820	FGT-like21	-0.746	-0.957	0.978	0.978	0.978	0.978	-0.586	0.978	-0.669	-0.309	0.978	0.454	0.978	0.978	0.978	0.725	0.807
Unigene028391	FGT-like22	0.635	0.25	-0.168	-0.168	-0.168	-0.168	-0.833	-0.168	-0.77	0.938	-0.168	-0.872	-0.168	-0.168	-0.168	-0.659	-0.557
Unigene028693	FGT-like23	0.924	0.677	-0.613	-0.613	-0.613	-0.613	-0.474	-0.613	-0.378	0.991	-0.613	-1.000*	-0.613	-0.613	-0.613	-0.936	-0.883
Unigene031238	FGT-like24	0.991	0.956	-0.928	-0.928	-0.928	-0.928	0.035	-0.928	0.141	0.787	-0.928	-0.874	-0.928	-0.928	-0.928	-0.986	-0.999*
Unigene031849	FGT-like25	0.745	0.957	-0.978	-0.978	-0.978	-0.978	0.587	-0.978	0.67	0.308	-0.978	-0.453	-0.978	-0.978	-0.978	-0.724	-0.806
Unigene033204	FGT-like26	-0.871	-0.582	0.512	0.512	0.512	0.512	0.578	0.512	0.488	-1.000**	0.512	0.99	0.512	0.512	0.512	0.886	0.819
Unigene034194	FGT-like27	0.438	0.018	0.066	0.066	0.066	0.066	-0.939	0.066	-0.897	0.831	0.066	-0.734	0.066	0.066	0.066	-0.465	-0.348
Unigene034195	FGT-like28	0.997	0.87	-0.826	-0.826	-0.826	-0.826	-0.181	-0.826	-0.076	0.901	-0.826	-0.958	-0.826	-0.826	-0.826	-0.999*	-0.984
Unigene034198	FGT-like29	0.776	0.438	-0.361	-0.361	-0.361	-0.361	-0.706	-0.361	-0.627	0.988	-0.361	-0.952	-0.361	-0.361	-0.361	-0.796	-0.711
Unigene034448	FGT-like30	0.553	0.15	-0.066	-0.066	-0.066	-0.066	-0.885	-0.066	-0.831	0.897	-0.066	-0.817	-0.066	-0.066	-0.066	-0.579	-0.469
Unigene034659	FGT-like31	-0.564	-0.859	0.899	0.899	0.899	0.899	-0.764	0.899	-0.828	-0.071	0.899	0.226	0.899	0.899	0.899	0.538	0.641
Unigene036593	FGT-like32	-0.624	-0.237	0.154	0.154	0.154	0.154	0.841	0.154	0.779	-0.933	0.154	0.865	0.154	0.154	0.154	0.648	0.546
Unigene037034	FGT-like33	-0.29	0.14	-0.223	-0.223	-0.223	-0.223	0.982	-0.223	0.956	-0.733	-0.223	0.617	-0.223	-0.223	-0.223	0.32	0.196
Unigene037372	FGT-like34	0.509	0.824	-0.869	-0.869	-0.869	-0.869	0.805	-0.869	0.863	0.006	-0.869	-0.162	-0.869	-0.869	-0.869	-0.482	-0.59
Unigene037820	FGT-like35	-0.485	-0.808	0.855	0.855	0.855	0.855	-0.821	0.855	-0.876	0.021	0.855	0.135	0.855	0.855	0.855	0.457	0.568
Unigene038536	FGT-like36	1.000*	0.897	-0.857	-0.857	-0.857	-0.857	-0.124	-0.857	-0.018	0.875	-0.857	-0.94	-0.857	-0.857	-0.857	-1.000**	-0.993
Unigene041227	FGT-like37	0.887	0.61	-0.541	-0.541	-0.541	-0.541	-0.55	-0.541	-0.458	0.999*	-0.541	-0.994	-0.541	-0.541	-0.541	-0.901	-0.838
Unigene041419	FGT-like38	-0.886	-0.999*	0.999*	0.999*	0.999*	0.999*	-0.371	0.999*	-0.467	-0.532	0.999*	0.658	0.999*	0.999*	0.999*	0.871	0.927
Unigene041765	FGT-like39	-0.999*	-0.888	0.846	0.846	0.846	0.846	0.145	0.846	0.039	-0.885	0.846	0.947	0.846	0.846	0.846	1.000**	0.99
Unigene041879	FGT-like40	0.569	0.862	-0.902	-0.902	-0.902	-0.902	0.76	-0.902	0.825	0.077	-0.902	-0.232	-0.902	-0.902	-0.902	-0.543	-0.646
Unigene042167	FGT-like41	0.569	0.17	-0.086	-0.086	-0.086	-0.086	-0.876	-0.086	-0.82	0.906	-0.086	-0.829	-0.086	-0.086	-0.086	-0.595	-0.487
Unigene042168	FGT-like42	0.974	0.787	-0.732	-0.732	-0.732	-0.732	-0.326	-0.732	-0.224	0.956	-0.732	-0.99	-0.732	-0.732	-0.732	-0.98	-0.947
Unigene046010	FGT-like43	0.068	0.482	-0.554	-0.554	-0.554	-0.554	0.986	-0.554	0.998*	-0.444	-0.554	0.299	-0.554	-0.554	-0.554	-0.037	-0.164
Unigene048139	FGT-like44	-0.692	-0.323	0.242	0.242	0.242	0.242	0.789	0.242	0.719	-0.961	0.242	0.907	0.242	0.242	0.242	0.714	0.619
Unigene049282	FGT-like45	-0.648	-0.267	0.185	0.185	0.185	0.185	0.824	0.185	0.759	-0.943	0.185	0.88	0.185	0.185	0.185	0.672	0.571
Unigene054070	FGT-like46	-0.984	-0.968	0.943	0.943	0.943	0.943	-0.08	0.943	-0.185	-0.759	0.943	0.851	0.943	0.943	0.943	0.977	0.996
* p<0.05 ** p<0.01
		8-(2,3-Dihydroxy-3-methylbutyl)-5,7-dimethoxy-2-phenyl-2,3-dihydro-4H-chromen-4-one	Pratol	Diosmetin	Nepetin	Prunetin	Tectorigenin	Kaempferide	Bonanzin	Isorhamnetin	5-Hydroxy-2-(3-hydroxy-4-methoxyphenyl)-4-oxo-4H-chromen-7-yl β-D-glucopyranosiduronic acid	Ononin	Biochanin A-β-D-glucoside	Irisxanthone
Unigene009737	FMT-like1	-1.000**	0.616	0.507	-0.354	0.174	-0.645	0.651	0.816	-0.448	-0.751	-0.751	-0.197	-0.956
Unigene016334	FMT-like2	0.812	-0.962	-0.918	0.837	-0.722	0.972	-0.973	-0.317	0.889	0.996	0.996	-0.42	0.945
Unigene026068	FMT-like3	0.221	-0.901	-0.95	0.989	-0.999*	0.884	-0.881	0.391	0.969	0.806	0.806	-0.916	0.492
Unigene026069	FMT-like4	-0.15	0.868	0.926	-0.976	1.000*	-0.848	0.844	-0.456	-0.949	-0.761	-0.761	0.942	-0.428
Unigene031444	FMT-like5	0.732	-0.989	-0.96	0.899	-0.803	0.994	-0.994	-0.196	0.939	0.999*	0.999*	-0.53	0.897
Unigene039650	FMT-like6	0.656	-0.999*	-0.984	0.94	-0.861	1.000**	-1.000**	-0.091	0.97	0.99	0.99	-0.617	0.845
Unigene039651	FMT-like7	-0.579	-0.278	-0.403	0.552	-0.697	0.242	-0.235	0.946	0.463	0.096	0.096	-0.91	-0.32
Unigene039652	FMT-like8	0.88	-0.92	-0.86	0.761	-0.627	0.934	-0.936	-0.436	0.823	0.976	0.976	-0.301	0.979
Unigene053882	FMT-like9	0.734	-0.988	-0.959	0.898	-0.801	0.993	-0.994	-0.199	0.938	0.999*	0.999*	-0.527	0.899
* p<0.05 ** p<0.01
